# Supplementary material
Source: PubMed Central journal article supplement (PMC4752401)
Supplement: NIHMS720769-supplement-Supp_TableS1___FigureS1.pdf [file NIHMS720769-supplement-Supp_TableS1___FigureS1.pdf]

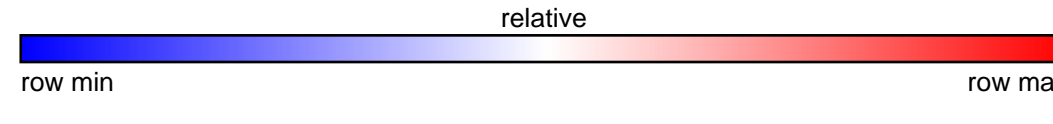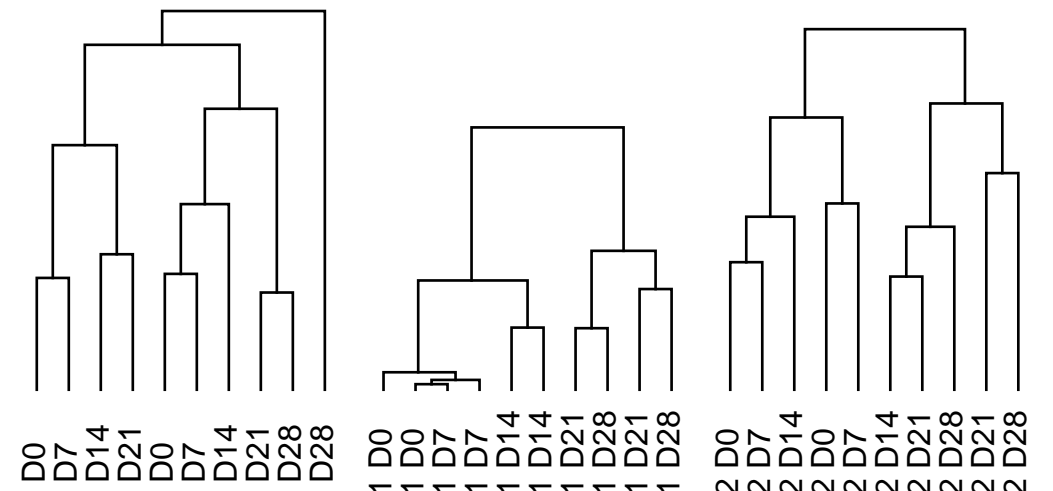

row min row max

Annotation-1

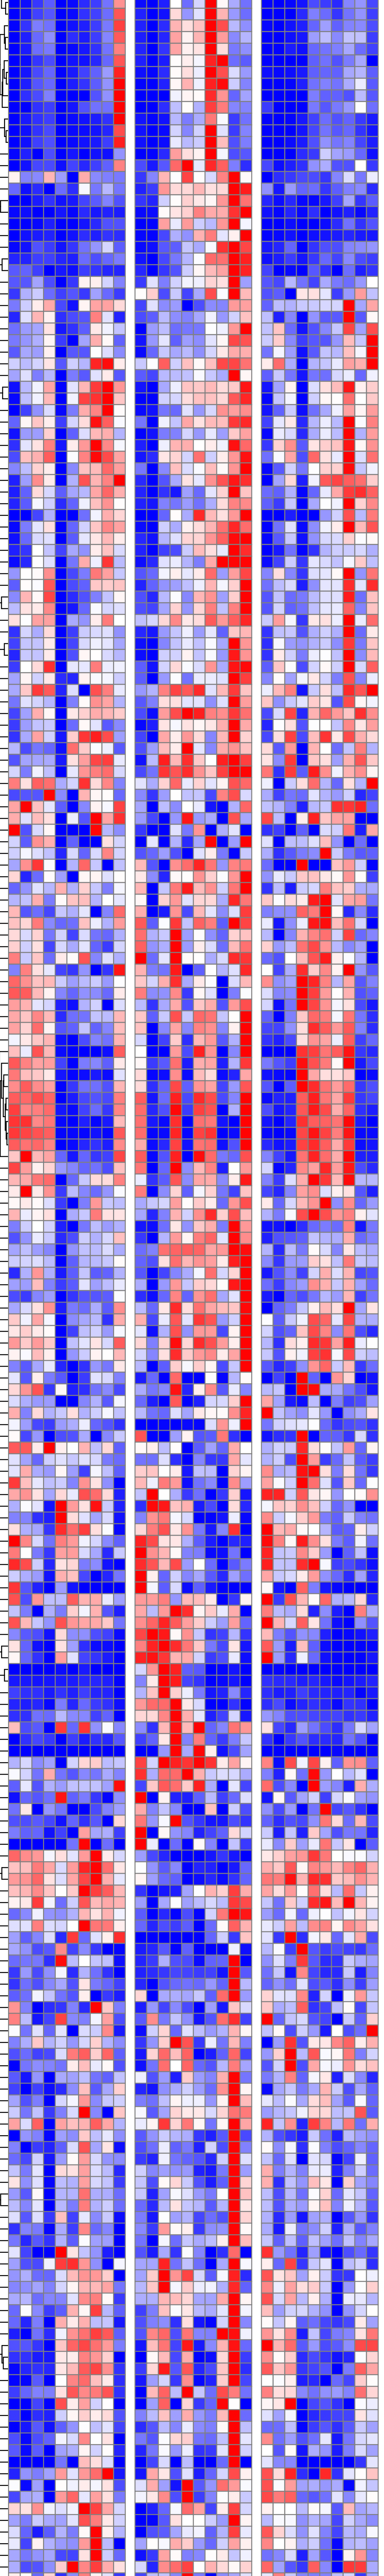

| Annotation                                                                                     | Annotation-1           |
|------------------------------------------------------------------------------------------------|------------------------|
| glutamine                                                                                      | Amino acid             |
| beta-alanine                                                                                   | Amino acid             |
| pyroglutamine*                                                                                 | Amino acid             |
| alanine                                                                                        | Amino acid             |
| 3-indoxyl sulfate                                                                              | Amino acid             |
| p-cresol sulfate                                                                               | Amino acid             |
| phenylalanine                                                                                  | Amino acid             |
| tyrosine                                                                                       | Amino acid             |
| glutaroyl carnitine                                                                            | Amino acid             |
| lysine                                                                                         | Amino acid             |
| 3-methyl-2-oxobutyrate                                                                         | Amino acid             |
| tryptophan betaine                                                                             | Amino acid             |
| 3-methyl-2-oxovalerate                                                                         | Amino acid             |
| 2-palmitoylglycerophosphocholine*                                                              | Lipid                  |
| 1-arachidonoylglycerophosphoethanolamine*                                                      | Lipid                  |
| nicotinamide adenine dinucleotide (NAD+)                                                       | Cofactors and vitamins |
| maltose                                                                                        | Carbohydrate           |
| myristoleate (14:1n5)                                                                          | Lipid                  |
| 2-hydroxybutyrate (AHB)                                                                        | Amino acid             |
| spermidine                                                                                     | Amino acid             |
| creatine                                                                                       | Amino acid             |
| adenosine 5'-monophosphate (AMP)                                                               | Nucleotide             |
| cis-vaccenate (18:1n7)                                                                         | Lipid                  |
| docosapentaenoate (n3 DPA; 22:5n3)                                                             | Lipid                  |
| xylulose                                                                                       | Carbohydrate           |
| xylofuranose                                                                                   | Carbohydrate           |
| terephthalic acid                                                                              | Xenobiotics            |
| erythritol                                                                                     | Xenobiotics            |
| malonate (17:0)                                                                                | Lipid                  |
| ornithine                                                                                      | Amino acid             |
| 5-oxoproline                                                                                   | Amino acid             |
| S-methylglutathione                                                                            | Amino acid             |
| ribitol                                                                                        | Carbohydrate           |
| ribose 5-phosphate                                                                             | Carbohydrate           |
| Isobar: ribulose 5-phosphate, xylulose 5-phosphate                                             | Carbohydrate           |
| 1-myristoylglycerophosphocholine                                                               | Lipid                  |
| cysteine                                                                                       | Amino acid             |
| S-methylcysteine                                                                               | Amino acid             |
| gamma-glutamylleucine                                                                          | Peptide                |
| threonine                                                                                      | Amino acid             |
| betaine                                                                                        | Amino acid             |
| glycodeoxycholate                                                                              | Lipid                  |
| urate                                                                                          | Nucleotide             |
| glycine                                                                                        | Amino acid             |
| 2-ethylhexanoate (isobar with 2-propylpentanoate)                                              | Xenobiotics            |
| lactate                                                                                        | Carbohydrate           |
| heptanoate (7:0)                                                                               | Lipid                  |
| trans-4-hydroxyproline                                                                         | Amino acid             |
| 2-methylbutyrylcarnitine                                                                       | Amino acid             |
| erucamide                                                                                      | Lipid                  |
| 10-heptadecenoate (17:1n7)                                                                     | Lipid                  |
| glycerophosphorylcholine (GPC)                                                                 | Lipid                  |
| serine                                                                                         | Amino acid             |
| ribulose                                                                                       | Carbohydrate           |
| arabitol                                                                                       | Carbohydrate           |
| butyrylcarnitine                                                                               | Lipid                  |
| deoxycarnitine                                                                                 | Lipid                  |
| palmitoylcarnitine                                                                             | Lipid                  |
| 2-docosahexaenoylglycerophosphoethanolamine*                                                   | Lipid                  |
| biliverdin                                                                                     | Cofactors and vitamins |
| 1-linoleoylglycerophosphocholine                                                               | Lipid                  |
| androsterone sulfate                                                                           | Lipid                  |
| 15-methylpalmitate (isobar with 2-methylpalmitate)                                             | Lipid                  |
| alpha-hydroxyisocaproate                                                                       | Amino acid             |
| isobutyrylcarnitine                                                                            | Amino acid             |
| 3-phosphoglycerate                                                                             | Carbohydrate           |
| trehalose                                                                                      | Carbohydrate           |
| 2-stearoylglycerophosphocholine*                                                               | Lipid                  |
| 1-palmitoylglycerol (1-monopalmitin)                                                           | Lipid                  |
| piperine                                                                                       | Xenobiotics            |
| 2-hydroxyglutarate                                                                             | Lipid                  |
| 1-stearoylglycerophosphocholine                                                                | Lipid                  |
| sedoheptulose-7-phosphate                                                                      | Carbohydrate           |
| linolenate (alpha or gamma; (18:3n3 or 6))                                                     | Lipid                  |
| glycochenodeoxycholate                                                                         | Lipid                  |
| Isobar: sorbitol, mannitol                                                                     | Carbohydrate           |
| 1,6-anhydroglucose                                                                             | Carbohydrate           |
| isomaltose                                                                                     | Carbohydrate           |
| pyruvate                                                                                       | Carbohydrate           |
| 1-oleoylglycerophosphoethanolamine                                                             | Lipid                  |
| methionine                                                                                     | Amino acid             |
| erythronate*                                                                                   | Carbohydrate           |
| phenol sulfate                                                                                 | Amino acid             |
| pyrophosphate (PPi)                                                                            | Energy                 |
| glutathione, oxidized (GSSG)                                                                   | Amino acid             |
| glycocholate                                                                                   | Lipid                  |
| 2-aminobutyrate                                                                                | Amino acid             |
| S-adenosylhomocysteine (SAH)                                                                   | Amino acid             |
| beta-sitosterol                                                                                | Lipid                  |
| mannose-6-phosphate                                                                            | Carbohydrate           |
| fructose                                                                                       | Carbohydrate           |
| N-6-trimethyllysine                                                                            | Amino acid             |
| adenosine 5 diphosphoribose                                                                    | Cofactors and vitamins |
| caprate (10:0)                                                                                 | Lipid                  |
| xylitol                                                                                        | Carbohydrate           |
| caprylate (8:0)                                                                                | Lipid                  |
| oleate (18:1n9)                                                                                | Lipid                  |
| Isobar: fructose 1,6-diphosphate, glucose 1,6-diphosphate, myo-inositol 1,4 or 1,3-diphosphate | Carbohydrate           |
| ratiidine                                                                                      | Xenobiotics            |
| pelargonate (9:0)                                                                              | Lipid                  |
| heme*                                                                                          | Cofactors and vitamins |
| eracthioneine                                                                                  | Xenobiotics            |
| hypoxanthine                                                                                   | Nucleotide             |
| trigonelline (N'-methylnicotinate)                                                             | Cofactors and vitamins |
| arabonate                                                                                      | Cofactors and vitamins |
| phosphoethanolamine                                                                            | Lipid                  |
| 6-phosphoaluronate                                                                             | Carbohydrate           |
| 1-palmitoylglycerophosphoethanolamine                                                          | Lipid                  |
| fumarate                                                                                       | Energy                 |
| 3-dehydrocarnitine*                                                                            | Lipid                  |
| 9,10-epoxystearate                                                                             | Lipid                  |
| propionylcarnitine                                                                             | Lipid                  |
| dihomo-linoleate (20:2n6)                                                                      | Lipid                  |
| uridine                                                                                        | Nucleotide             |
| kvnurenine                                                                                     | Amino acid             |
| paraxanthine                                                                                   | Xenobiotics            |
| glucose-6-phosphate (G6P)                                                                      | Carbohydrate           |
| phosphoenolpyruvate (PEP)                                                                      | Carbohydrate           |
| stachydrine                                                                                    | Xenobiotics            |
| theobromine                                                                                    | Xenobiotics            |
| catechol sulfate                                                                               | Xenobiotics            |
| glycerol 3-phosphate (G3P)                                                                     | Lipid                  |
| 7-beta-hydroxycholesterol                                                                      | Lipid                  |
| dihydroxycetone phosphate (DHAP)                                                               | Carbohydrate           |
| caproate (6:0)                                                                                 | Lipid                  |
| adenine                                                                                        | Nucleotide             |
| arabinose                                                                                      | Carbohydrate           |
| C-glycosyltryptophan*                                                                          | Amino acid             |
| alutamide                                                                                      | Amino acid             |
| 9,10-epoxystearate (12(Z)-E)-enoic acid                                                        | Lipid                  |
| homostachydrine*                                                                               | Xenobiotics            |
| homocysteine                                                                                   | Amino acid             |
| phenylacetylglutamine                                                                          | Amino acid             |
| 1,5-anhydroglucitol (1,5-AG)                                                                   | Carbohydrate           |
| 1,3-dihydroxyacetone                                                                           | Carbohydrate           |
| linoleate (18:2n6)                                                                             | Lipid                  |
| dihomo-linolenate (20:3n3 or n6)                                                               | Lipid                  |
| oleoylcarnitine                                                                                | Lipid                  |
| inosine 5'-monophosphate (IMP)                                                                 | Nucleotide             |
| 2-arachidonoylglycerophosphoethanolamine*                                                      | Lipid                  |
| eicosapentaenoate (EPA; 20:5n3)                                                                | Lipid                  |
| malate                                                                                         | Energy                 |
| N-acetylmethionine                                                                             | Amino acid             |
| 4-methyl-2-oxopentanoate                                                                       | Amino acid             |
| pipecolate                                                                                     | Amino acid             |
| stearoyl sphingomyelin                                                                         | Lipid                  |
| threitol                                                                                       | Carbohydrate           |
| mead acid (20:3n9)                                                                             | Lipid                  |
| docosahexaenoate (DHA; 22:6n3)                                                                 | Lipid                  |
| arachidonate (20:4n6)                                                                          | Lipid                  |
| adenosine 5'-diphosphate (ADP)                                                                 | Nucleotide             |
| beta-hydroxybutyrate                                                                           | Amino acid             |
| quanosine                                                                                      | Nucleotide             |
| theophylline                                                                                   | Xenobiotics            |
| adrenate (22:4n6)                                                                              | Lipid                  |
| azelate (nonanedioate)                                                                         | Lipid                  |
| threonate                                                                                      | Cofactors and vitamins |
| urea                                                                                           | Amino acid             |
| mannose                                                                                        | Carbohydrate           |
| 1,2-propanediol                                                                                | Lipid                  |
| 2-hydroxypalmitate                                                                             | Lipid                  |
| lathosterol                                                                                    | Lipid                  |
| leucine                                                                                        | Amino acid             |
| valine                                                                                         | Amino acid             |
| alpha-hydroxyisovalerate                                                                       | Amino acid             |
| phosphate                                                                                      | Energy                 |
| proline                                                                                        | Amino acid             |
| cis-aconitate                                                                                  | Energy                 |
| palmitoyl sphingomyelin                                                                        | Lipid                  |
| allantoin                                                                                      | Nucleotide             |
| aspartate                                                                                      | Amino acid             |
| histidine                                                                                      | Amino acid             |
| asparagine                                                                                     | Amino acid             |
| tryptophan                                                                                     | Amino acid             |
| hydroxyisovaleryl carnitine                                                                    | Amino acid             |
| citruilline                                                                                    | Amino acid             |
| palmitate (16:0)                                                                               | Lipid                  |
| stearoylcarnitine                                                                              | Lipid                  |
| glycerate                                                                                      | Carbohydrate           |
| pentadecanoate (15:0)                                                                          | Lipid                  |
| 2-oleoylglycerophosphocholine*                                                                 | Lipid                  |
| dimethylglycine                                                                                | Amino acid             |
| citrate                                                                                        | Energy                 |
| 2-docosapentaenoylglycerophosphoethanolamine*                                                  | Lipid                  |
| carnitine                                                                                      | Lipid                  |
| N-acetylneuraminic acid                                                                        | Carbohydrate           |
| glutathione, reduced (GSH)                                                                     | Amino acid             |
| N-acetylglycine                                                                                | Amino acid             |
| laurate (12:0)                                                                                 | Lipid                  |
| hexanoylcarnitine                                                                              | Energy                 |
| acetylphosphate                                                                                | Energy                 |
| fructose-6-phosphate                                                                           | Carbohydrate           |
| 1-palmitoylglycerophosphocholine                                                               | Lipid                  |
| acetylcarnitine                                                                                | Lipid                  |
| 5-methylthioadenosine (MTA)                                                                    | Amino acid             |
| hippurate                                                                                      | Xenobiotics            |
| isovalerylcarnitine                                                                            | Amino acid             |
| choline                                                                                        | Lipid                  |
| arginine                                                                                       | Amino acid             |
| myristate (14:0)                                                                               | Lipid                  |
| glucose                                                                                        | Carbohydrate           |
| palmitoleate (16:1n7)                                                                          | Lipid                  |
| creatinine                                                                                     | Amino acid             |
| 2,3-diphosphoglycerate                                                                         | Carbohydrate           |
| isoleucine                                                                                     | Amino acid             |
| 1-oleoylglycerophosphocholine                                                                  | Lipid                  |
| 2-arachidonoylglycerophosphocholine*                                                           | Lipid                  |
| pseudouridine                                                                                  | Nucleotide             |
| glycolate (hydroxyacetate)                                                                     | Xenobiotics            |
| 13-methylmristic acid                                                                          | Lipid                  |
| ophthalmate                                                                                    | Amino acid             |
| alpha-tocopherol                                                                               | Cofactors and vitamins |
| nicotinamide                                                                                   | Cofactors and vitamins |
| caffeine                                                                                       | Xenobiotics            |
| adenosine                                                                                      | Nucleotide             |
| N1-Methyl-2-pyridone-5-carboxamide                                                             | Cofactors and vitamins |
| stearate (18:0)                                                                                | Lipid                  |
| ethanolamine                                                                                   | Lipid                  |
| succinylcarnitine                                                                              | Energy                 |
| octanoylcarnitine                                                                              | Lipid                  |
| campesterol                                                                                    | Lipid                  |
| 2-linoleoylglycerophosphocholine*                                                              | Lipid                  |
| myo-inositol                                                                                   | Lipid                  |
| cholesterol                                                                                    | Lipid                  |
| pantothenate                                                                                   | Cofactors and vitamins |

## PATHWAY SORT

| ORDER | BIOCHEMICAL NAME                                   | SUPER PATHWAY | SUB PATHWAY                                      | CAS          | KEGG                                               |
|-------|----------------------------------------------------|---------------|--------------------------------------------------|--------------|----------------------------------------------------|
| 905   | 1,2-propanediol                                    | Lipid         | Ketone bodies                                    | 57-55-6;     | <a href="#">C00717,C02912,C00583,C01506,C02917</a> |
| 532   | 1,3-dihydroxyacetone                               | Carbohydrate  | Glycolysis, gluconeogenesis, pyruvate metabolism | 62147-49-3;  | <a href="#">C00184</a>                             |
| 515   | 1,5-anhydroglucitol (1,5-AG)                       | Carbohydrate  | Glycolysis, gluconeogenesis, pyruvate metabolism | 154-58-5;    | <a href="#">C07326</a>                             |
| 523   | 1,6-anhydroglucose                                 | Carbohydrate  | Glycolysis, gluconeogenesis, pyruvate metabolism | 498-07-7;    |                                                    |
| 636   | 10-heptadecenoate (17:1n7)                         | Lipid         | Long chain fatty acid                            | 29743-97-3;  |                                                    |
| 742   | 13-methylmyristic acid                             | Lipid         | Fatty acid, branched                             | 2485-71-4;   |                                                    |
| 744   | 15-methylpalmitate (isobar with 2-methylpalmitate) | Lipid         | Fatty acid, branched                             |              |                                                    |
| 919   | 1-arachidonoylglycerophosphoethanolamine*          | Lipid         | Lysolipid                                        |              |                                                    |
| 938   | 1-linoleoylglycerophosphocholine                   | Lipid         | Lysolipid                                        |              | <a href="#">C04100</a>                             |
| 926   | 1-myristoylglycerophosphocholine                   | Lipid         | Lysolipid                                        | 20559-16-4;  |                                                    |
| 936   | 1-oleoylglycerophosphocholine                      | Lipid         | Lysolipid                                        | 19420-56-5;  |                                                    |
| 915   | 1-oleoylglycerophosphoethanolamine                 | Lipid         | Lysolipid                                        |              |                                                    |
| 970   | 1-palmitoylglycerol (1-monopalmitin)               | Lipid         | Monoacylglycerol                                 | 542-44-9;    |                                                    |
| 929   | 1-palmitoylglycerophosphocholine                   | Lipid         | Lysolipid                                        | 17364-16-8;  |                                                    |
| 909   | 1-palmitoylglycerophosphoethanolamine              | Lipid         | Lysolipid                                        |              |                                                    |
| 934   | 1-stearoylglycerophosphocholine                    | Lipid         | Lysolipid                                        | 19420-57-6;  |                                                    |
| 533   | 2,3-diphosphoglycerate                             | Carbohydrate  | Glycolysis, gluconeogenesis, pyruvate metabolism | 102783-53-9; | <a href="#">C01159</a>                             |
| 263   | 2-aminobutyrate                                    | Amino acid    | Butanoate metabolism                             | 1492-24-6;   | <a href="#">C02261</a>                             |
| 945   | 2-arachidonoylglycerophosphocholine*               | Lipid         | Lysolipid                                        |              |                                                    |
| 920   | 2-arachidonoylglycerophosphoethanolamine*          | Lipid         | Lysolipid                                        |              |                                                    |
| 923   | 2-docosahexaenoylglycerophosphoethanolamine*       | Lipid         | Lysolipid                                        |              |                                                    |
| 922   | 2-docosapentaenoylglycerophosphoethanolamine*      | Lipid         | Lysolipid                                        |              |                                                    |
| 1360  | 2-ethylhexanoate (isobar with 2-propylpentanoate)  | Xenobiotics   | Chemical                                         |              |                                                    |
| 229   | 2-hydroxybutyrate (AHB)                            | Amino acid    | Cysteine, methionine, SAM, taurine metabolism    | 3347-90-8;   | <a href="#">C05984</a>                             |
| 714   | 2-hydroxyglutarate                                 | Lipid         | Fatty acid, dicarboxylate                        | 40951-21-1;  | <a href="#">C02630</a>                             |
| 706   | 2-hydroxypalmitate                                 | Lipid         | Fatty acid, monohydroxy                          | 764-67-0;    |                                                    |
| 939   | 2-linoleoylglycerophosphocholine*                  | Lipid         | Lysolipid                                        |              |                                                    |

## PATHWAY SORT

| ORDER | BIOCHEMICAL NAME                   | SUPER PATHWAY          | SUB PATHWAY                                      | CAS                  | KEGG                   |
|-------|------------------------------------|------------------------|--------------------------------------------------|----------------------|------------------------|
| 202   | 2-methylbutyrylcarnitine           | Amino acid             | Valine, leucine and isoleucine metabolism        | 31023-25-3;          |                        |
| 937   | 2-oleoylglycerophosphocholine*     | Lipid                  | Lysolipid                                        |                      |                        |
| 930   | 2-palmitoylglycerophosphocholine*  | Lipid                  | Lysolipid                                        |                      |                        |
| 935   | 2-stearoylglycerophosphocholine*   | Lipid                  | Lysolipid                                        |                      |                        |
| 821   | 3-dehydrocarnitine*                | Lipid                  | Carnitine metabolism                             | 10457-99-5;          | <a href="#">C02636</a> |
| 170   | 3-indoxyl sulfate                  | Amino acid             | Tryptophan metabolism                            | 2642-37-7;           |                        |
| 172   | 3-methyl-2-oxobutyrate             | Amino acid             | Valine, leucine and isoleucine metabolism        | 3715-29-5;           | <a href="#">C00141</a> |
| 173   | 3-methyl-2-oxovalerate             | Amino acid             | Valine, leucine and isoleucine metabolism        | 51829-07-3;          | <a href="#">C00671</a> |
| 529   | 3-phosphoglycerate                 | Carbohydrate           | Glycolysis, gluconeogenesis, pyruvate metabolism | 80731-10-8;          | <a href="#">C00597</a> |
| 193   | 4-methyl-2-oxopentanoate           | Amino acid             | Valine, leucine and isoleucine metabolism        | 816-66-0;            | <a href="#">C00233</a> |
| 266   | 5-methylthioadenosine (MTA)        | Amino acid             | Polyamine metabolism                             | 2457-80-9;           | <a href="#">C00170</a> |
| 282   | 5-oxoproline                       | Amino acid             | Glutathione metabolism                           | 98-79-3;             | <a href="#">C01879</a> |
| 545   | 6-phosphogluconate                 | Carbohydrate           | Nucleotide sugars, pentose metabolism            | 921-62-0;53411-70-4; | <a href="#">C00345</a> |
| 1024  | 7-beta-hydroxycholesterol          | Lipid                  | Sterol/Steroid                                   | 566-27-8;            | <a href="#">C03594</a> |
| 712.5 | 9,10-epoxyoctadec-12(Z)-enoic acid | Lipid                  | Long chain fatty acid                            |                      | <a href="#">C14825</a> |
| 672   | 9,10-epoxystearate                 | Lipid                  | Fatty acid, oxidized                             |                      |                        |
| 822   | acetylcarnitine                    | Lipid                  | Carnitine metabolism                             | 5080-50-2;           | <a href="#">C02571</a> |
| 601   | acetylphosphate                    | Energy                 | Oxidative phosphorylation                        | 94249-01-1;          | <a href="#">C00227</a> |
| 1105  | adenine                            | Nucleotide             | Purine metabolism, adenine containing            | 73-24-5;             | <a href="#">C00147</a> |
| 1106  | adenosine                          | Nucleotide             | Purine metabolism, adenine containing            | 58-61-7;             | <a href="#">C00212</a> |
| 1116  | adenosine 5'-diphosphate (ADP)     | Nucleotide             | Purine metabolism, adenine containing            | 20398-34-9;          | <a href="#">C00008</a> |
| 1232  | adenosine 5'diphosphoribose        | Cofactors and vitamins | Nicotinate and nicotinamide metabolism           | 68414-18-6;          | <a href="#">C00301</a> |
| 1114  | adenosine 5'-monophosphate (AMP)   | Nucleotide             | Purine metabolism, adenine containing            | 149022-20-8;         | <a href="#">C00020</a> |
| 665   | adrenate (22:4n6)                  | Lipid                  | Long chain fatty acid                            | 2091-25-0;           | <a href="#">C16527</a> |

PATHWAY SORT

| ORDER | BIOCHEMICAL NAME         | SUPER PATHWAY          | SUB PATHWAY                                 | CAS                     | KEGG                   |
|-------|--------------------------|------------------------|---------------------------------------------|-------------------------|------------------------|
| 27    | alanine                  | Amino acid             | Alanine and aspartate metabolism            | 56-41-7;                | <a href="#">C00041</a> |
| 1150  | allantoin                | Nucleotide             | Purine metabolism, urate metabolism         | 97-59-6;                | <a href="#">C02350</a> |
| 179   | alpha-hydroxyisocaproate | Amino acid             | Valine, leucine and isoleucine metabolism   | 10303-64-7;             | <a href="#">C03264</a> |
| 198   | alpha-hydroxyisovalerate | Amino acid             | Valine, leucine and isoleucine metabolism   | 600-37-3;               |                        |
| 1266  | alpha-tocopherol         | Cofactors and vitamins | Tocopherol metabolism                       | 59-02-9;10191-41-0;     | <a href="#">C02477</a> |
| 1034  | androsterone sulfate     | Lipid                  | Sterol/Steroid                              | 2479-86-9 ;             | <a href="#">C00523</a> |
| 566   | arabinose                | Carbohydrate           | Nucleotide sugars, pentose metabolism       | 28697-53-2;             | <a href="#">C00181</a> |
| 546   | arabitol                 | Carbohydrate           | Nucleotide sugars, pentose metabolism       | 488-82-4;               | <a href="#">C00474</a> |
| 1202  | arabonate                | Cofactors and vitamins | Ascorbate and aldarate metabolism           | 7643-75-7;              |                        |
| 659   | arachidonate (20:4n6)    | Lipid                  | Long chain fatty acid                       | 506-32-1;               | <a href="#">C00219</a> |
| 241   | arginine                 | Amino acid             | Urea cycle; arginine-, proline-, metabolism | 1119-34-2;              | <a href="#">C00062</a> |
| 25    | asparagine               | Amino acid             | Alanine and aspartate metabolism            | 70-47-3;                | <a href="#">C00152</a> |
| 24    | aspartate                | Amino acid             | Alanine and aspartate metabolism            | 56-84-8;                | <a href="#">C00049</a> |
| 721   | azelate (nonanedioate)   | Lipid                  | Fatty acid, dicarboxylate                   | 123-99-9;               | <a href="#">C08261</a> |
| 26    | beta-alanine             | Amino acid             | Alanine and aspartate metabolism            | 56-41-7;107-95-9;       | <a href="#">C00099</a> |
| 7     | beta-hydroxypyruvate     | Amino acid             | Glycine, serine and threonine metabolism    | 3369-79-7;              | <a href="#">C00168</a> |
| 22    | betaine                  | Amino acid             | Glycine, serine and threonine metabolism    | 107-43-7;               |                        |
| 1057  | beta-sitosterol          | Lipid                  | Sterol/Steroid                              | 83-46-5;                | <a href="#">C01753</a> |
| 1216  | biliverdin               | Cofactors and vitamins | Hemoglobin and porphyrin metabolism         | 55482-27-4;55482-27-4 ; | <a href="#">C00500</a> |

PATHWAY SORT

| ORDER | BIOCHEMICAL NAME                   | SUPER PATHWAY | SUB PATHWAY                                      | CAS                   | KEGG                   |
|-------|------------------------------------|---------------|--------------------------------------------------|-----------------------|------------------------|
| 811   | butyrylcarnitine                   | Lipid         | Fatty acid metabolism (also BCAA metabolism)     | 25576-40-3;           |                        |
| 1612  | caffeine                           | Xenobiotics   | Xanthine metabolism                              | 58-08-2;              | <a href="#">C07481</a> |
| 1059  | campesterol                        | Lipid         | Sterol/Steroid                                   | 474-62-4;             | <a href="#">C01789</a> |
| 622   | caprate (10:0)                     | Lipid         | Medium chain fatty acid                          | 112-37-8;             | <a href="#">C01571</a> |
| 618   | caproate (6:0)                     | Lipid         | Medium chain fatty acid                          | 142-62-1;             | <a href="#">C01585</a> |
| 620   | caprylate (8:0)                    | Lipid         | Medium chain fatty acid                          | 124-07-2;             | <a href="#">C06423</a> |
| 820   | carnitine                          | Lipid         | Carnitine metabolism                             | 461-05-2;             |                        |
| 1300  | catechol sulfate                   | Xenobiotics   | Benzoate metabolism                              |                       | <a href="#">C00090</a> |
| 164   | C-glycosyltryptophan*              | Amino acid    | Tryptophan metabolism                            |                       |                        |
| 1020  | cholesterol                        | Lipid         | Sterol/Steroid                                   | 57-88-5;              | <a href="#">C00187</a> |
| 881   | choline                            | Lipid         | Glycerolipid metabolism                          | 67-48-1;              |                        |
| 582   | cis-aconitate                      | Energy        | Krebs cycle                                      | 585-84-2;             | <a href="#">C00417</a> |
| 641   | cis-vaccenate (18:1n7)             | Lipid         | Long chain fatty acid                            | 693-72-1;             | <a href="#">C08367</a> |
| 579   | citrate                            | Energy        | Krebs cycle                                      | 77-92-9;              | <a href="#">C00158</a> |
| 248   | citrulline                         | Amino acid    | Urea cycle; arginine-, proline-, metabolism      | 372-75-8;             | <a href="#">C00327</a> |
| 259   | creatine                           | Amino acid    | Creatine metabolism                              | 57-00-1;              | <a href="#">C00300</a> |
| 260   | creatinine                         | Amino acid    | Creatine metabolism                              | 60-27-5;              | <a href="#">C00791</a> |
| 213   | cysteine                           | Amino acid    | Cysteine, methionine, SAM, taurine metabolism    | 52-90-4;56-89-3;      | <a href="#">C00097</a> |
| 819   | deoxycarnitine                     | Lipid         | Carnitine metabolism                             | 6249-56-5;            | <a href="#">C01181</a> |
| 655   | dihomo-linoleate (20:2n6)          | Lipid         | Long chain fatty acid                            | 2091-39-6;            | <a href="#">C16525</a> |
| 609   | dihomo-linolenate (20:3n3 or n6)   | Lipid         | Essential fatty acid                             |                       | <a href="#">C03242</a> |
| 531   | dihydroxyacetone phosphate (DHAP)  | Carbohydrate  | Glycolysis, gluconeogenesis, pyruvate metabolism | 102783-56-2;          | <a href="#">C00111</a> |
| 3     | dimethylglycine                    | Amino acid    | Glycine, serine and threonine metabolism         | 1118-68-9;            | <a href="#">C01026</a> |
| 613   | docosahexaenoate (DHA; 22:6n3)     | Lipid         | Essential fatty acid                             | 6217-54-5;            | <a href="#">C06429</a> |
| 611   | docosapentaenoate (n3 DPA; 22:5n3) | Lipid         | Essential fatty acid                             | 2234-74-4 ;           | <a href="#">C16513</a> |
| 610   | eicosapentaenoate (EPA; 20:5n3)    | Lipid         | Essential fatty acid                             | 10-2005-9;10417-94-4; | <a href="#">C06428</a> |
| 1565  | ergothioneine                      | Xenobiotics   | Food component/Plant                             | 58511-63-0;           | <a href="#">C05570</a> |
| 735   | erucamide                          | Lipid         | Fatty acid, amide                                | 112-84-5;             |                        |
| 1632  | erythritol                         | Xenobiotics   | Sugar, sugar substitute, starch                  | 149-32-6;             | <a href="#">C00503</a> |
| 453   | erythronate*                       | Carbohydrate  | Aminosugars metabolism                           | 13752-84-6;           |                        |

**PATHWAY SORT**

| <b>ORDER</b> | <b>BIOCHEMICAL NAME</b>        | <b>SUPER PATHWAY</b>   | <b>SUB PATHWAY</b>                                           | <b>CAS</b>         | <b>KEGG</b>            |
|--------------|--------------------------------|------------------------|--------------------------------------------------------------|--------------------|------------------------|
| 876          | ethanolamine                   | Lipid                  | Glycerolipid metabolism                                      | 141-43-5;          | <a href="#">C00189</a> |
| 472          | fructose                       | Carbohydrate           | Fructose, mannose, galactose, starch, and sucrose metabolism | 57-48-7;           | <a href="#">C00095</a> |
| 524          | fructose-6-phosphate           | Carbohydrate           | Glycolysis, gluconeogenesis, pyruvate metabolism             | 103213-47-4;       | <a href="#">C05345</a> |
| 594          | fumarate                       | Energy                 | Krebs cycle                                                  | 100-17-8;          | <a href="#">C00122</a> |
| 404          | gamma-glutamylleucine          | Peptide                | gamma-glutamyl                                               | 2566-39-4;         |                        |
| 521          | glucose                        | Carbohydrate           | Glycolysis, gluconeogenesis, pyruvate metabolism             | 50-99-7;           | <a href="#">C00293</a> |
| 519          | glucose-6-phosphate (G6P)      | Carbohydrate           | Glycolysis, gluconeogenesis, pyruvate metabolism             | 103192-55-8;       | <a href="#">C00668</a> |
| 39           | glutamate                      | Amino acid             | Glutamate metabolism                                         | 56-86-0;           | <a href="#">C00025</a> |
| 44           | glutamine                      | Amino acid             | Glutamate metabolism                                         | 56-85-9;           | <a href="#">C00064</a> |
| 80           | glutaroyl carnitine            | Amino acid             | Lysine metabolism                                            | 102636-82-8;       |                        |
| 283          | glutathione, oxidized (GSSG)   | Amino acid             | Glutathione metabolism                                       | 103239-24-3;       | <a href="#">C00127</a> |
| 280          | glutathione, reduced (GSH)     | Amino acid             | Glutathione metabolism                                       | 70-18-8;           | <a href="#">C00051</a> |
| 517          | glycerate                      | Carbohydrate           | Glycolysis, gluconeogenesis, pyruvate metabolism             | 600-19-1;          | <a href="#">C00258</a> |
| 882          | glycerol 3-phosphate (G3P)     | Lipid                  | Glycerolipid metabolism                                      | 29849-82-9;        | <a href="#">C00093</a> |
| 883          | glycerophosphorylcholine (GPC) | Lipid                  | Glycerolipid metabolism                                      | 28319-77-9;        | <a href="#">C00670</a> |
| 1            | glycine                        | Amino acid             | Glycine, serine and threonine metabolism                     | 56-40-6;           | <a href="#">C00037</a> |
| 851          | glycochenodeoxycholate         | Lipid                  | Bile acid metabolism                                         | 16564-43-5;        | <a href="#">C05466</a> |
| 840          | glycocholate                   | Lipid                  | Bile acid metabolism                                         | 475-31-0;863-57-0; | <a href="#">C01921</a> |
| 849          | glycodeoxycholate              | Lipid                  | Bile acid metabolism                                         | 360-65-6;          | <a href="#">C05464</a> |
| 1318         | glycolate (hydroxyacetate)     | Xenobiotics            | Chemical                                                     | 79-14-1;           | <a href="#">C00160</a> |
| 1128         | guanosine                      | Nucleotide             | Purine metabolism, guanine containing                        | 118-00-3;          | <a href="#">C00387</a> |
| 1212         | heme*                          | Cofactors and vitamins | Hemoglobin and porphyrin metabolism                          | 14875-96-8;        |                        |
| 619          | heptanoate (7:0)               | Lipid                  | Medium chain fatty acid                                      | 111-14-8;          | <a href="#">C17714</a> |
| 823          | hexanoylcarnitine              | Lipid                  | Carnitine metabolism                                         | 6920-35-0;         | <a href="#">C01585</a> |
| 1288         | hippurate                      | Xenobiotics            | Benzoate metabolism                                          | 495-69-2;          | <a href="#">C01586</a> |
| 50           | histidine                      | Amino acid             | Histidine metabolism                                         | 5934-29-2;         | <a href="#">C00135</a> |

PATHWAY SORT

| ORDER | BIOCHEMICAL NAME                                                        | SUPER PATHWAY | SUB PATHWAY                                                  | CAS         | KEGG                                                      |
|-------|-------------------------------------------------------------------------|---------------|--------------------------------------------------------------|-------------|-----------------------------------------------------------|
| 231   | homocysteine                                                            | Amino acid    | Cysteine, methionine, SAM, taurine metabolism                | 454-29-5;   | <a href="#">C00155</a>                                    |
| 1585  | homostachydrine*                                                        | Xenobiotics   | Food component/Plant                                         | 1195-94-4;  | <a href="#">C08283</a>                                    |
| 206   | hydroxyisovaleroyl carnitine                                            | Amino acid    | Valine, leucine and isoleucine metabolism                    | 99159-87-2; |                                                           |
| 1098  | hypoxanthine                                                            | Nucleotide    | Purine metabolism, (hypo)xanthine/inosine containing         | 68-94-0;    | <a href="#">C00262</a>                                    |
| 1101  | inosine 5'-monophosphate (IMP)                                          | Nucleotide    | Purine metabolism, (hypo)xanthine/inosine containing         | 4691-65-0;  | <a href="#">C00130</a>                                    |
|       | Isobar: fructose 1,6-diphosphate, glucose 1,6-diphosphate, myo-inositol |               |                                                              |             |                                                           |
| 527   | 1,4 or 1,3-diphosphate                                                  | Carbohydrate  | Glycolysis, gluconeogenesis, pyruvate metabolism             |             |                                                           |
| 561   | Isobar: ribulose 5-phosphate, xylulose 5-phosphate                      | Carbohydrate  | Nucleotide sugars, pentose metabolism                        |             |                                                           |
| 496   | Isobar: sorbitol, mannitol                                              | Carbohydrate  | Fructose, mannose, galactose, starch, and sucrose metabolism |             | <a href="#">C00392,C01722,C01697,C01489,C00794,C01507</a> |
| 200   | isobutyrylcarnitine                                                     | Amino acid    | Valine, leucine and isoleucine metabolism                    | 25518-49-4; |                                                           |
| 180   | isoleucine                                                              | Amino acid    | Valine, leucine and isoleucine metabolism                    | 73-32-5;    | <a href="#">C00407</a>                                    |
| 478   | isomaltose                                                              | Carbohydrate  | Fructose, mannose, galactose, starch, and sucrose metabolism | 499-40-1;   | <a href="#">C00252</a>                                    |
| 205   | isovalerylcarnitine                                                     | Amino acid    | Valine, leucine and isoleucine metabolism                    |             |                                                           |
| 144   | kynurenine                                                              | Amino acid    | Tryptophan metabolism                                        | 2922-83-0;  | <a href="#">C00328</a>                                    |
| 536   | lactate                                                                 | Carbohydrate  | Glycolysis, gluconeogenesis, pyruvate metabolism             | 79-33-4;    | <a href="#">C00186</a>                                    |
| 1018  | lathosterol                                                             | Lipid         | Sterol/Steroid                                               | 80-99-9 ;   | <a href="#">C01189</a>                                    |
| 625   | laurate (12:0)                                                          | Lipid         | Medium chain fatty acid                                      | 143-07-7;   | <a href="#">C02679</a>                                    |
| 181   | leucine                                                                 | Amino acid    | Valine, leucine and isoleucine metabolism                    | 61-90-5;    | <a href="#">C00123</a>                                    |

**PATHWAY SORT**

| <b>ORDER</b> | <b>BIOCHEMICAL NAME</b>                    | <b>SUPER PATHWAY</b>   | <b>SUB PATHWAY</b>                                           | <b>CAS</b>              | <b>KEGG</b>            |
|--------------|--------------------------------------------|------------------------|--------------------------------------------------------------|-------------------------|------------------------|
| 604          | linoleate (18:2n6)                         | Lipid                  | Essential fatty acid                                         | 60-33-3;                | <a href="#">C01595</a> |
| 608          | linolenate [alpha or gamma; (18:3n3 or 6)] | Lipid                  | Essential fatty acid                                         |                         | <a href="#">C06427</a> |
| 69           | lysine                                     | Amino acid             | Lysine metabolism                                            | 56-87-1;                | <a href="#">C00047</a> |
| 598          | malate                                     | Energy                 | Krebs cycle                                                  | 6915-15-7;              | <a href="#">C00149</a> |
| 482          | maltose                                    | Carbohydrate           | Fructose, mannose, galactose, starch, and sucrose metabolism | 6363-53-7;              | <a href="#">C00208</a> |
| 487          | mannose                                    | Carbohydrate           | Fructose, mannose, galactose, starch, and sucrose metabolism | 3458-28-4;              | <a href="#">C00159</a> |
| 489          | mannose-6-phosphate                        | Carbohydrate           | Fructose, mannose, galactose, starch, and sucrose metabolism | 70442-25-0;104872-94-8; | <a href="#">C00275</a> |
| 635          | margarate (17:0)                           | Lipid                  | Long chain fatty acid                                        | 506-12-7;               |                        |
| 658          | mead acid (20:3n9)                         | Lipid                  | Long chain fatty acid                                        | 20590-32-3;             |                        |
| 225          | methionine                                 | Amino acid             | Cysteine, methionine, SAM, taurine metabolism                | 63-68-3;                | <a href="#">C00073</a> |
| 890          | myo-inositol                               | Lipid                  | Inositol metabolism                                          | 87-89-8;                | <a href="#">C00137</a> |
| 629          | myristate (14:0)                           | Lipid                  | Long chain fatty acid                                        | 544-63-8;               | <a href="#">C06424</a> |
| 630          | myristoleate (14:1n5)                      | Lipid                  | Long chain fatty acid                                        | 544-64-9 ;              | <a href="#">C08322</a> |
| 1242.1       | N1-Methyl-2-pyridone-5-carboxamide         | Cofactors and vitamins | Nicotinate and nicotinamide metabolism                       | 701-44-0;               | <a href="#">C05842</a> |
| 75           | N-6-trimethyllysine                        | Amino acid             | Lysine metabolism                                            | 23284-33-5;             |                        |
| 4            | N-acetyl glycine                           | Amino acid             | Glycine, serine and threonine metabolism                     | 543-24-8;               |                        |
| 227          | N-acetylmethionine                         | Amino acid             | Cysteine, methionine, SAM, taurine metabolism                | 65-82-7;                | <a href="#">C02712</a> |
| 455          | N-acetylneuraminat                         | Carbohydrate           | Aminosugars metabolism                                       | 131-48-6;               | <a href="#">C00270</a> |
| 1221         | nicotinamide                               | Cofactors and vitamins | Nicotinate and nicotinamide metabolism                       | 98-92-0;                | <a href="#">C00153</a> |
| 1224         | nicotinamide adenine dinucleotide (NAD+)   | Cofactors and vitamins | Nicotinate and nicotinamide metabolism                       | 53-84-9;                | <a href="#">C00003</a> |
| 825          | octanoylcarnitine                          | Lipid                  | Carnitine metabolism                                         | 3671-77-0;              |                        |
| 639          | oleate (18:1n9)                            | Lipid                  | Long chain fatty acid                                        | 112-80-1;               | <a href="#">C00712</a> |
| 835          | oleoylcarnitine                            | Lipid                  | Carnitine metabolism                                         |                         |                        |



PATHWAY SORT

| ORDER | BIOCHEMICAL NAME          | SUPER PATHWAY          | SUB PATHWAY                                      | CAS          | KEGG                   |
|-------|---------------------------|------------------------|--------------------------------------------------|--------------|------------------------|
| 285   | ophthalmate               | Amino acid             | Glutathione metabolism                           | 495-27-2;    |                        |
| 244   | ornithine                 | Amino acid             | Urea cycle; arginine-, proline-, metabolism      | 3184-13-2;   | <a href="#">C00077</a> |
| 632   | palmitate (16:0)          | Lipid                  | Long chain fatty acid                            | 57-10-3;     | <a href="#">C00249</a> |
| 633   | palmitoleate (16:1n7)     | Lipid                  | Long chain fatty acid                            | 373-49-9;    | <a href="#">C08362</a> |
| 1004  | palmitoyl sphingomyelin   | Lipid                  | Sphingolipid                                     |              |                        |
| 833   | palmitoylcarnitine        | Lipid                  | Carnitine metabolism                             | 6865-14-1;   |                        |
| 1243  | pantothenate              | Cofactors and vitamins | Pantothenate and CoA metabolism                  | 137-08-6;    | <a href="#">C00864</a> |
| 1613  | paraxanthine              | Xenobiotics            | Xanthine metabolism                              | 611-59-6;    | <a href="#">C13747</a> |
| 88    | p-cresol sulfate          | Amino acid             | Phenylalanine & tyrosine metabolism              | 3233-57-7;   | <a href="#">C01468</a> |
| 621   | pelargonate (9:0)         | Lipid                  | Medium chain fatty acid                          | 112-05-0;    | <a href="#">C01601</a> |
| 631   | pentadecanoate (15:0)     | Lipid                  | Long chain fatty acid                            | 1002-84-2;   | <a href="#">C16537</a> |
| 135   | phenol sulfate            | Amino acid             | Phenylalanine & tyrosine metabolism              | 937-34-8;    | <a href="#">C02180</a> |
| 128   | phenylacetylglutamine     | Amino acid             | Phenylalanine & tyrosine metabolism              | 28047-15-6;  | <a href="#">C05597</a> |
| 83    | phenylalanine             | Amino acid             | Phenylalanine & tyrosine metabolism              | 63-91-2;     | <a href="#">C00079</a> |
| 602   | phosphate                 | Energy                 | Oxidative phosphorylation                        | 7664-38-2 ;  | <a href="#">C00009</a> |
| 534   | phosphoenolpyruvate (PEP) | Carbohydrate           | Glycolysis, gluconeogenesis, pyruvate metabolism | 10526-80-4;  | <a href="#">C00074</a> |
| 877   | phosphoethanolamine       | Lipid                  | Glycerolipid metabolism                          | 1071-23-4;   | <a href="#">C00346</a> |
| 74    | pipecolate                | Amino acid             | Lysine metabolism                                | 4043-87-2;   | <a href="#">C00408</a> |
| 1531  | piperine                  | Xenobiotics            | Food component/Plant                             | 94-62-2;     | <a href="#">C03882</a> |
| 246   | proline                   | Amino acid             | Urea cycle; arginine-, proline-, metabolism      | 147-85-3;    | <a href="#">C00148</a> |
| 809   | propionylcarnitine        | Lipid                  | Fatty acid metabolism (also BCAA metabolism)     | 17298-37-2 ; | <a href="#">C03017</a> |
| 1181  | pseudouridine             | Nucleotide             | Pyrimidine metabolism, uracil containing         | 1445-07-4;   | <a href="#">C02067</a> |
| 45    | pyroglutamine*            | Amino acid             | Glutamate metabolism                             |              |                        |
| 603   | pyrophosphate (PPi)       | Energy                 | Oxidative phosphorylation                        | 1466-09-3;   | <a href="#">C00013</a> |

**PATHWAY SORT**

| <b>ORDER</b> | <b>BIOCHEMICAL NAME</b>      | <b>SUPER PATHWAY</b>   | <b>SUB PATHWAY</b>                               | <b>CAS</b>              | <b>KEGG</b>            |
|--------------|------------------------------|------------------------|--------------------------------------------------|-------------------------|------------------------|
| 535          | pyruvate                     | Carbohydrate           | Glycolysis, gluconeogenesis, pyruvate metabolism | 127-17-3;               | <a href="#">C00022</a> |
| 1469         | ranitidine                   | Xenobiotics            | Drug                                             | 66357-59-3;             | <a href="#">D00422</a> |
| 548          | ribitol                      | Carbohydrate           | Nucleotide sugars, pentose metabolism            | 488-81-3;               | <a href="#">C00474</a> |
| 557          | ribose 5-phosphate           | Carbohydrate           | Nucleotide sugars, pentose metabolism            | 18265-46-8;108321-05-7; | <a href="#">C00117</a> |
| 559          | ribulose                     | Carbohydrate           | Nucleotide sugars, pentose metabolism            | 488-84-6;               | <a href="#">C00309</a> |
| 224          | S-adenosylhomocysteine (SAH) | Amino acid             | Cysteine, methionine, SAM, taurine metabolism    | 979-92-0;               | <a href="#">C00021</a> |
| 551          | sedoheptulose-7-phosphate    | Carbohydrate           | Nucleotide sugars, pentose metabolism            | 2646-35-7;              | <a href="#">C05382</a> |
| 8            | serine                       | Amino acid             | Glycine, serine and threonine metabolism         | 56-45-1;                | <a href="#">C00065</a> |
| 216          | S-methylcysteine             | Amino acid             | Cysteine, methionine, SAM, taurine metabolism    | 1187-84-4;              |                        |
| 281          | S-methylglutathione          | Amino acid             | Glutathione metabolism                           | 2922-56-7;              | <a href="#">C11347</a> |
| 270          | spermidine                   | Amino acid             | Polyamine metabolism                             | 124-20-9;               | <a href="#">C00315</a> |
| 1584         | stachydrine                  | Xenobiotics            | Food component/Plant                             | 4136-37-2;              | <a href="#">C10172</a> |
| 637          | stearate (18:0)              | Lipid                  | Long chain fatty acid                            | 57-11-4;                | <a href="#">C01530</a> |
| 1005         | stearoyl sphingomyelin       | Lipid                  | Sphingolipid                                     | 85187-10-6;85187-10-6;  | <a href="#">C00550</a> |
| 834          | stearoylcarnitine            | Lipid                  | Carnitine metabolism                             | 18822-91-8;             |                        |
| 591          | succinylcarnitine            | Energy                 | Krebs cycle                                      |                         |                        |
| 1662         | terephthalic acid            | Xenobiotics            | Phthalate                                        | 100-21-0;               | <a href="#">C06337</a> |
| 1614         | theobromine                  | Xenobiotics            | Xanthine metabolism                              | 83-67-0;                | <a href="#">C07480</a> |
| 1615         | theophylline                 | Xenobiotics            | Xanthine metabolism                              | 58-55-9;                | <a href="#">C07130</a> |
| 549          | threitol                     | Carbohydrate           | Nucleotide sugars, pentose metabolism            | 2418-52-2;              | <a href="#">C16884</a> |
| 1199         | threonate                    | Cofactors and vitamins | Ascorbate and aldarate metabolism                | 70753-61-6;             | <a href="#">C01620</a> |
| 17           | threonine                    | Amino acid             | Glycine, serine and threonine metabolism         | 72-19-5;                | <a href="#">C00188</a> |
| 252          | trans-4-hydroxyproline       | Amino acid             | Urea cycle; arginine-, proline-, metabolism      | 51-35-4;                | <a href="#">C01157</a> |

PATHWAY SORT

| ORDER | BIOCHEMICAL NAME                                | SUPER PATHWAY          | SUB PATHWAY                                                  | CAS               | KEGG                          |
|-------|-------------------------------------------------|------------------------|--------------------------------------------------------------|-------------------|-------------------------------|
| 501   | trehalose                                       | Carbohydrate           | Fructose, mannose, galactose, starch, and sucrose metabolism | 6138-23-4;        | <a href="#">C01083</a>        |
| 1242  | trigonelline (N <sup>1</sup> -methylnicotinate) | Cofactors and vitamins | Nicotinate and nicotinamide metabolism                       | 6138-41-6 ;       |                               |
| 145   | tryptophan                                      | Amino acid             | Tryptophan metabolism                                        | 73-22-3;          | <a href="#">C00078</a>        |
| 151   | tryptophan betaine                              | Amino acid             | Tryptophan metabolism                                        | 20671-76-5;       | <a href="#">C09213</a>        |
| 99    | tyrosine                                        | Amino acid             | Phenylalanine & tyrosine metabolism                          | 60-18-4;          | <a href="#">C00082</a>        |
| 1149  | urate                                           | Nucleotide             | Purine metabolism, urate metabolism                          | 69-93-2;120K5305; | <a href="#">C00366</a>        |
| 245   | urea                                            | Amino acid             | Urea cycle; arginine-, proline-, metabolism                  | 57-13-6;          | <a href="#">C00086</a>        |
| 1180  | uridine                                         | Nucleotide             | Pyrimidine metabolism, uracil containing                     | 58-96-8;          | <a href="#">C00299</a>        |
| 190   | valine                                          | Amino acid             | Valine, leucine and isoleucine metabolism                    | 72-18-4;          | <a href="#">C00183</a>        |
| 565   | xylitol                                         | Carbohydrate           | Nucleotide sugars, pentose metabolism                        | 87-99-0;          | <a href="#">C00379</a>        |
| 570   | xylonate                                        | Carbohydrate           | Nucleotide sugars, pentose metabolism                        | 73686-31-7;       | <a href="#">C00502,C05411</a> |
| 569   | xylose                                          | Carbohydrate           | Nucleotide sugars, pentose metabolism                        | 609-06-3;         | <a href="#">C00181</a>        |

| SAMPLE NAME       | DARM-00001       | DARM-00002       |
|-------------------|------------------|------------------|
| CLIENT IDENTIFIER | NHSCi 2003 T2 D0 | NHSCi 2003 T2 D7 |
| SAMPLE ID         | 997731           | 997714           |
| PARENT SAMPLE ID  | 991346           | 991347           |
| ACTUAL            | NHSCi 2003 T2 D0 | NHSCi 2003 T2 D7 |
| COND DAY          | T2 D0            | T2 D7            |
| BRADFORD PROTEIN  | 168.571          | 179.95           |
| Group HMDB        | T2 D0            | T2 D7            |

PATHWAY SORT  
ORDER

| BIOCHEMICAL NAME                                       | Group HMDB                | T2 D0     | T2 D7     |
|--------------------------------------------------------|---------------------------|-----------|-----------|
| 905 1,2-propanediol                                    | <a href="#">HMDB01881</a> | 848,843   | 3,867,385 |
| 532 1,3-dihydroxyacetone                               | <a href="#">HMDB01882</a> | 72,358    | 86,588    |
| 515 1,5-anhydroglucitol (1,5-AG)                       | <a href="#">HMDB02712</a> | 9,119,645 | 7,888,787 |
| 523 1,6-anhydroglucose                                 | <a href="#">HMDB00640</a> | 383,268   | 291,235   |
| 636 10-heptadecenoate (17:1n7)                         |                           | 62,398    | 92,393    |
| 742 13-methylmyristic acid                             |                           | 62,907    | 119,838   |
| 744 15-methylpalmitate (isobar with 2-methylpalmitate) |                           | 113,326   | 278,457   |
| 919 1-arachidonoylglycerophosphoethanolamine*          | <a href="#">HMDB11517</a> | 34,842    | 42,908    |
| 938 1-linoleoylglycerophosphocholine                   |                           | 272,671   | 354,976   |
| 926 1-myristoylglycerophosphocholine                   | <a href="#">HMDB10379</a> |           |           |
| 936 1-oleoylglycerophosphocholine                      |                           | 83,831    | 44,483    |
| 915 1-oleoylglycerophosphoethanolamine                 | <a href="#">HMDB11506</a> | 20,885    | 24,750    |
| 970 1-palmitoylglycerol (1-monopalmitin)               |                           | 15,799    | 43,332    |
| 929 1-palmitoylglycerophosphocholine                   |                           | 339,238   | 368,197   |
| 909 1-palmitoylglycerophosphoethanolamine              | <a href="#">HMDB11503</a> | 20,300    | 27,592    |
| 934 1-stearoylglycerophosphocholine                    |                           | 234,253   | 155,235   |
| 533 2,3-diphosphoglycerate                             | <a href="#">HMDB01294</a> | 439,404   | 176,181   |
| 263 2-aminobutyrate                                    | <a href="#">HMDB00650</a> | 1,286,677 | 1,365,578 |
| 945 2-arachidonoylglycerophosphocholine*               |                           | 30,785    | 33,968    |
| 920 2-arachidonoylglycerophosphoethanolamine*          |                           | 106,856   | 90,289    |
| 923 2-docosahexaenoylglycerophosphoethanolamine*       |                           | 50,987    |           |
| 922 2-docosapentaenoylglycerophosphoethanolamine*      |                           | 32,223    | 51,932    |
| 1360 2-ethylhexanoate (isobar with 2-propylpentanoate) |                           | 34,165    | 41,323    |
| 229 2-hydroxybutyrate (AHB)                            | <a href="#">HMDB00008</a> | 1,395,042 | 1,168,788 |
| 714 2-hydroxyglutarate                                 | <a href="#">HMDB00606</a> | 67,436    | 55,569    |
| 706 2-hydroxypalmitate                                 |                           | 44,836    | 57,604    |
| 939 2-linoleoylglycerophosphocholine*                  |                           |           | 88,889    |

| SAMPLE NAME       | DARM-00001       | DARM-00002       |
|-------------------|------------------|------------------|
| CLIENT IDENTIFIER | NHSCi 2003 T2 D0 | NHSCi 2003 T2 D7 |
| SAMPLE ID         | 997731           | 997714           |
| PARENT SAMPLE ID  | 991346           | 991347           |
| ACTUAL            | NHSCi 2003 T2 D0 | NHSCi 2003 T2 D7 |
| COND DAY          | T2 D0            | T2 D7            |
| BRADFORD PROTEIN  | 168,571          | 179,95           |

PATHWAY SORT

| ORDER | BIOCHEMICAL NAME                   | Group HMDB                | T2 D0      | T2 D7      |
|-------|------------------------------------|---------------------------|------------|------------|
| 202   | 2-methylbutyrylcarnitine           | <a href="#">HMDB00378</a> | 47,519     | 54,219     |
| 937   | 2-oleoylglycerophosphocholine*     |                           |            |            |
| 930   | 2-palmitoylglycerophosphocholine*  |                           |            |            |
| 935   | 2-stearoylglycerophosphocholine*   |                           | 65,500     |            |
| 821   | 3-dehydrocarnitine*                | <a href="#">HMDB12154</a> | 1,065,773  | 977,149    |
| 170   | 3-indoxyl sulfate                  | <a href="#">HMDB00682</a> | 11,032     | 8,631      |
| 172   | 3-methyl-2-oxobutyrate             | <a href="#">HMDB00019</a> | 38,821     | 44,517     |
| 173   | 3-methyl-2-oxovalerate             | <a href="#">HMDB03736</a> | 53,292     | 53,366     |
| 529   | 3-phosphoglycerate                 | <a href="#">HMDB00807</a> | 2,151,451  | 1,081,048  |
| 193   | 4-methyl-2-oxopentanoate           | <a href="#">HMDB00695</a> | 116,549    | 122,839    |
| 266   | 5-methylthioadenosine (MTA)        | <a href="#">HMDB01173</a> | 46,891     | 84,011     |
| 282   | 5-oxoproline                       | <a href="#">HMDB00267</a> | 46,823     | 170,475    |
| 545   | 6-phosphogluconate                 | <a href="#">HMDB01316</a> | 188,497    | 90,500     |
| 1024  | 7-beta-hydroxycholesterol          | <a href="#">HMDB06119</a> | 37,063     | 32,538     |
| 712.5 | 9,10-epoxyoctadec-12(Z)-enoic acid | <a href="#">HMDB04701</a> | 15,263     | 86,068     |
| 672   | 9,10-epoxystearate                 |                           | 292,557    | 5,466,700  |
| 822   | acetylcarnitine                    | <a href="#">HMDB00201</a> | 3,688,832  | 3,081,463  |
| 601   | acetylphosphate                    | <a href="#">HMDB01494</a> | 3,238,971  | 3,234,994  |
| 1105  | adenine                            | <a href="#">HMDB00034</a> | 46,158,980 | 36,248,408 |
| 1106  | adenosine                          | <a href="#">HMDB00050</a> |            | 15,757     |
| 1116  | adenosine 5'-diphosphate (ADP)     | <a href="#">HMDB01341</a> | 251,985    | 267,661    |
| 1232  | adenosine 5'diphosphoribose        | <a href="#">HMDB01178</a> | 131,568    | 117,241    |
| 1114  | adenosine 5'-monophosphate (AMP)   | <a href="#">HMDB00045</a> | 2,991,014  | 4,314,713  |
| 665   | adrenate (22:4n6)                  | <a href="#">HMDB02226</a> | 34,852     | 145,403    |

| PATHWAY SORT |                          | SAMPLE NAME               | DARM-00001       | DARM-00002       |
|--------------|--------------------------|---------------------------|------------------|------------------|
| ORDER        | BIOCHEMICAL NAME         | CLIENT IDENTIFIER         | NHSCi 2003 T2 D0 | NHSCi 2003 T2 D7 |
|              |                          | SAMPLE ID                 | 997731           | 997714           |
|              |                          | PARENT SAMPLE ID          | 991346           | 991347           |
|              |                          | ACTUAL                    | NHSCi 2003 T2 D0 | NHSCi 2003 T2 D7 |
|              |                          | COND DAY                  | T2 D0            | T2 D7            |
|              |                          | BRADFORD PROTEIN          | 168,571          | 179,95           |
|              |                          | Group HMDB                | T2 D0            | T2 D7            |
| 27           | alanine                  | <a href="#">HMDB00161</a> | 49,301,460       | 46,689,744       |
| 1150         | allantoin                | <a href="#">HMDB00462</a> | 39,195           | 27,663           |
| 179          | alpha-hydroxyisocaproate | <a href="#">HMDB00746</a> |                  |                  |
| 198          | alpha-hydroxyisovalerate | <a href="#">HMDB00407</a> | 406,667          | 337,453          |
| 1266         | alpha-tocopherol         | <a href="#">HMDB01893</a> | 259,705          | 236,793          |
| 1034         | androsterone sulfate     | <a href="#">HMDB02759</a> | 6,335            | 4,875            |
| 566          | arabinose                | <a href="#">HMDB00646</a> | 359,692          | 285,425          |
| 546          | arabitol                 | <a href="#">HMDB01851</a> | 608,598          | 484,073          |
| 1202         | arabonate                | <a href="#">HMDB00539</a> | 109,163          | 89,223           |
| 659          | arachidonate (20:4n6)    | <a href="#">HMDB01043</a> | 850,050          | 1,218,465        |
| 241          | arginine                 | <a href="#">HMDB00517</a> | 1,044,174        | 521,652          |
| 25           | asparagine               | <a href="#">HMDB00168</a> | 1,333,427        | 1,139,404        |
| 24           | aspartate                | <a href="#">HMDB00191</a> | 5,837,734        | 5,138,599        |
| 721          | azelate (nonanedioate)   | <a href="#">HMDB00784</a> | 7,020            | 18,214           |
| 26           | beta-alanine             | <a href="#">HMDB00056</a> | 84,654           | 94,481           |
| 7            | beta-hydroxypyruvate     | <a href="#">HMDB01352</a> | 341,291          | 239,597          |
| 22           | betaine                  | <a href="#">HMDB00043</a> | 1,105,156        | 991,686          |
| 1057         | beta-sitosterol          | <a href="#">HMDB00852</a> | 24,409           |                  |
| 1216         | biliverdin               | <a href="#">HMDB01008</a> |                  |                  |

| SAMPLE NAME       | DARM-00001       | DARM-00002       |
|-------------------|------------------|------------------|
| CLIENT IDENTIFIER | NHSCi 2003 T2 D0 | NHSCi 2003 T2 D7 |
| SAMPLE ID         | 997731           | 997714           |
| PARENT SAMPLE ID  | 991346           | 991347           |
| ACTUAL            | NHSCi 2003 T2 D0 | NHSCi 2003 T2 D7 |
| COND DAY          | T2 D0            | T2 D7            |
| BRADFORD PROTEIN  | 168,571          | 179,95           |

PATHWAY SORT

ORDER            BIOCHEMICAL NAME

|                                        | Group HMDB                | T2 D0       | T2 D7       |
|----------------------------------------|---------------------------|-------------|-------------|
| 811 butyrylcarnitine                   |                           | 16,911      | 14,330      |
| 1612 caffeine                          | <a href="#">HMDB01847</a> | 2,855,568   | 2,509,127   |
| 1059 campesterol                       | <a href="#">HMDB02869</a> | 237,124     | 110,634     |
| 622 caprate (10:0)                     | <a href="#">HMDB00511</a> | 15,587      | 28,666      |
| 618 caproate (6:0)                     | <a href="#">HMDB00535</a> | 77,173      | 55,538      |
| 620 caprylate (8:0)                    | <a href="#">HMDB00482</a> | 13,339      | 30,641      |
| 820 carnitine                          |                           | 834,820     | 718,340     |
| 1300 catechol sulfate                  |                           | 91,756      | 83,703      |
| 164 C-glycosyltryptophan*              |                           | 28,900      | 25,554      |
| 1020 cholesterol                       | <a href="#">HMDB00067</a> | 34,703,420  | 32,446,710  |
| 881 choline                            |                           | 645,180     | 780,927     |
| 582 cis-aconitate                      | <a href="#">HMDB00072</a> | 560,918     | 929,571     |
| 641 cis-vaccenate (18:1n7)             |                           | 292,696     | 194,918     |
| 579 citrate                            | <a href="#">HMDB00094</a> | 394,077,408 | 320,473,280 |
| 248 citrulline                         | <a href="#">HMDB00904</a> | 148,972     | 145,526     |
| 259 creatine                           | <a href="#">HMDB00064</a> | 3,278,860   | 3,139,046   |
| 260 creatinine                         | <a href="#">HMDB00562</a> | 324,911     | 388,210     |
| 213 cysteine                           | <a href="#">HMDB00574</a> | 634,807     | 652,845     |
| 819 deoxycarnitine                     | <a href="#">HMDB01161</a> | 548,836     | 478,623     |
| 655 dihomol-inoate (20:2n6)            |                           | 35,591      | 56,119      |
| 609 dihomol-inoate (20:3n3 or n6)      | <a href="#">HMDB02925</a> | 81,689      | 109,604     |
| 531 dihydroxyacetone phosphate (DHAP)  | <a href="#">HMDB01473</a> | 23,885      | 69,834      |
| 3 dimethylglycine                      | <a href="#">HMDB00092</a> | 267,234     | 277,681     |
| 613 docosahexaenoate (DHA; 22:6n3)     | <a href="#">HMDB02183</a> | 127,566     | 212,381     |
| 611 docosapentaenoate (n3 DPA; 22:5n3) | <a href="#">HMDB01976</a> | 51,249      | 73,295      |
| 610 eicosapentaenoate (EPA; 20:5n3)    | <a href="#">HMDB01999</a> | 178,046     | 249,841     |
| 1565 ergothioneine                     | <a href="#">HMDB03045</a> | 535,149     | 531,221     |
| 735 erucamide                          |                           | 139,553     | 198,771     |
| 1632 erythritol                        | <a href="#">HMDB02994</a> | 918,980     | 1,080,344   |
| 453 erythronate*                       | <a href="#">HMDB00613</a> | 313,920     | 376,749     |

| SAMPLE NAME       | DARM-00001       | DARM-00002       |
|-------------------|------------------|------------------|
| CLIENT IDENTIFIER | NHSCi 2003 T2 D0 | NHSCi 2003 T2 D7 |
| SAMPLE ID         | 997731           | 997714           |
| PARENT SAMPLE ID  | 991346           | 991347           |
| ACTUAL            | NHSCi 2003 T2 D0 | NHSCi 2003 T2 D7 |
| COND DAY          | T2 D0            | T2 D7            |
| BRADFORD PROTEIN  | 168,571          | 179,95           |

PATHWAY SORT

| ORDER | BIOCHEMICAL NAME               | Group HMDB                | T2 D0         | T2 D7       |
|-------|--------------------------------|---------------------------|---------------|-------------|
| 876   | ethanolamine                   | <a href="#">HMDB00149</a> | 321,089       | 658,117     |
| 472   | fructose                       | <a href="#">HMDB00660</a> | 65,757,520    | 63,837,628  |
| 524   | fructose-6-phosphate           | <a href="#">HMDB00124</a> | 496,403       | 512,296     |
| 594   | fumarate                       | <a href="#">HMDB00134</a> | 275,184       | 296,538     |
| 404   | gamma-glutamylleucine          | <a href="#">HMDB11171</a> | 29,809        | 24,092      |
| 521   | glucose                        | <a href="#">HMDB00122</a> | 1,100,230,656 | 954,082,560 |
| 519   | glucose-6-phosphate (G6P)      | <a href="#">HMDB01401</a> | 1,454,115     | 1,323,591   |
| 39    | glutamate                      | <a href="#">HMDB03339</a> | 5,532,164     | 4,146,794   |
| 44    | glutamine                      | <a href="#">HMDB00641</a> | 1,830,972     | 1,718,438   |
| 80    | glutaroyl carnitine            | <a href="#">HMDB13130</a> | 19,378        | 14,312      |
| 283   | glutathione, oxidized (GSSG)   | <a href="#">HMDB03337</a> | 1,549,227     | 1,150,501   |
| 280   | glutathione, reduced (GSH)     | <a href="#">HMDB00125</a> | 26,491,108    | 17,362,302  |
| 517   | glycerate                      | <a href="#">HMDB00139</a> | 264,687       | 360,365     |
| 882   | glycerol 3-phosphate (G3P)     | <a href="#">HMDB00126</a> | 322,127       | 285,538     |
| 883   | glycerophosphorylcholine (GPC) | <a href="#">HMDB00086</a> | 184,227       | 155,277     |
| 1     | glycine                        | <a href="#">HMDB00123</a> | 31,483,824    | 30,068,884  |
| 851   | glycochenodeoxycholate         | <a href="#">HMDB00637</a> | 16,931        | 16,697      |
| 840   | glycocholate                   | <a href="#">HMDB00138</a> | 6,120         | 4,136       |
| 849   | glycodeoxycholate              | <a href="#">HMDB00631</a> | 6,487         |             |
| 1318  | glycolate (hydroxyacetate)     | <a href="#">HMDB00115</a> | 425,658       | 396,184     |
| 1128  | guanosine                      | <a href="#">HMDB00133</a> | 40,847        | 33,118      |
| 1212  | heme*                          |                           | 1,775,876     | 524,329     |
| 619   | heptanoate (7:0)               | <a href="#">HMDB00666</a> | 10,987        | 17,158      |
| 823   | hexanoylcarnitine              | <a href="#">HMDB00705</a> | 70,206        | 34,266      |
| 1288  | hippurate                      | <a href="#">HMDB00714</a> | 58,525        | 52,699      |
| 50    | histidine                      | <a href="#">HMDB00177</a> | 36,496        | 39,560      |



| PATHWAY SORT |                                                                         | SAMPLE NAME               | DARM-00001       | DARM-00002       |
|--------------|-------------------------------------------------------------------------|---------------------------|------------------|------------------|
| ORDER        | BIOCHEMICAL NAME                                                        | CLIENT IDENTIFIER         | NHSCi 2003 T2 D0 | NHSCi 2003 T2 D7 |
|              |                                                                         | SAMPLE ID                 | 997731           | 997714           |
|              |                                                                         | PARENT SAMPLE ID          | 991346           | 991347           |
|              |                                                                         | ACTUAL                    | NHSCi 2003 T2 D0 | NHSCi 2003 T2 D7 |
|              |                                                                         | COND DAY                  | T2 D0            | T2 D7            |
|              |                                                                         | BRADFORD PROTEIN          | 168,571          | 179,95           |
|              |                                                                         | Group HMDB                | T2 D0            | T2 D7            |
|              | 231 homocysteine                                                        | <a href="#">HMDB00742</a> | 16,193           | 24,733           |
|              | 1585 homostachydrine*                                                   |                           | 49,015           | 41,677           |
|              | 206 hydroxyisovaleroyl carnitine                                        |                           | 193,039          | 159,446          |
|              | 1098 hypoxanthine                                                       | <a href="#">HMDB00157</a> | 255,963          | 315,974          |
|              | 1101 inosine 5'-monophosphate (IMP)                                     | <a href="#">HMDB00175</a> | 104,400          | 190,719          |
|              | Isobar: fructose 1,6-diphosphate, glucose 1,6-diphosphate, myo-inositol |                           |                  |                  |
|              | 527 1,4 or 1,3-diphosphate                                              |                           | 73,077           | 72,990           |
|              | 561 Isobar: ribulose 5-phosphate, xylulose 5-phosphate                  |                           | 87,743           | 122,479          |
|              | 496 Isobar: sorbitol, mannitol                                          | <a href="#">HMDB00247</a> | 18,878,152       | 16,521,461       |
|              | 200 isobutyrylcarnitine                                                 |                           | 155,407          | 137,258          |
|              | 180 isoleucine                                                          | <a href="#">HMDB00172</a> | 4,247,789        | 3,651,103        |
|              | 478 isomaltose                                                          | <a href="#">HMDB02923</a> | 2,211,305        | 1,527,311        |
|              | 205 isovalerylcarnitine                                                 | <a href="#">HMDB00688</a> | 90,170           | 74,684           |
|              | 144 kynurenine                                                          | <a href="#">HMDB00684</a> | 115,490          | 109,456          |
|              | 536 lactate                                                             | <a href="#">HMDB00190</a> | 226,508,752      | 661,456,640      |
|              | 1018 lathosterol                                                        | <a href="#">HMDB01170</a> | 75,256           | 82,920           |
|              | 625 laurate (12:0)                                                      | <a href="#">HMDB00638</a> | 110,171          | 127,732          |
|              | 181 leucine                                                             | <a href="#">HMDB00687</a> | 7,866,940        | 7,253,589        |

| SAMPLE NAME       | DARM-00001       | DARM-00002       |
|-------------------|------------------|------------------|
| CLIENT IDENTIFIER | NHSCi 2003 T2 D0 | NHSCi 2003 T2 D7 |
| SAMPLE ID         | 997731           | 997714           |
| PARENT SAMPLE ID  | 991346           | 991347           |
| ACTUAL            | NHSCi 2003 T2 D0 | NHSCi 2003 T2 D7 |
| COND DAY          | T2 D0            | T2 D7            |
| BRADFORD PROTEIN  | 168,571          | 179,95           |

PATHWAY SORT

| ORDER  | BIOCHEMICAL NAME                           | Group HMDB                | T2 D0      | T2 D7      |
|--------|--------------------------------------------|---------------------------|------------|------------|
| 604    | linoleate (18:2n6)                         | <a href="#">HMDB00673</a> | 1,811,663  | 2,917,321  |
| 608    | linolenate [alpha or gamma; (18:3n3 or 6)] | <a href="#">HMDB01388</a> | 446,144    | 662,587    |
| 69     | lysine                                     | <a href="#">HMDB00182</a> | 2,060,373  | 2,375,808  |
| 598    | malate                                     | <a href="#">HMDB00156</a> | 802,391    | 1,133,712  |
| 482    | maltose                                    | <a href="#">HMDB00163</a> | 1,213,462  | 1,061,234  |
| 487    | mannose                                    | <a href="#">HMDB00169</a> | 15,465,050 | 13,156,129 |
| 489    | mannose-6-phosphate                        | <a href="#">HMDB01078</a> | 223,451    | 283,027    |
| 635    | margarate (17:0)                           | <a href="#">HMDB02259</a> | 281,578    | 453,773    |
| 658    | mead acid (20:3n9)                         | <a href="#">HMDB10378</a> | 16,233     | 21,473     |
| 225    | methionine                                 | <a href="#">HMDB00696</a> | 846,151    | 600,002    |
| 890    | myo-inositol                               | <a href="#">HMDB00211</a> | 1,625,582  | 1,678,786  |
| 629    | myristate (14:0)                           | <a href="#">HMDB00806</a> | 391,047    | 759,814    |
| 630    | myristoleate (14:1n5)                      | <a href="#">HMDB02000</a> | 15,905     | 17,880     |
| 1242.1 | N1-Methyl-2-pyridone-5-carboxamide         | <a href="#">HMDB04193</a> | 296,358    | 288,787    |
| 75     | N-6-trimethyllysine                        |                           | 95,814     | 90,583     |
| 4      | N-acetylglycine                            | <a href="#">HMDB00532</a> | 97,087     | 71,552     |
| 227    | N-acetylmethionine                         | <a href="#">HMDB11745</a> |            | 4,377      |
| 455    | N-acetylneuraminat                         | <a href="#">HMDB00230</a> | 28,716     | 46,233     |
| 1221   | nicotinamide                               | <a href="#">HMDB01406</a> | 2,316,366  | 2,552,832  |
| 1224   | nicotinamide adenine dinucleotide (NAD+)   | <a href="#">HMDB00902</a> | 3,710      | 3,123      |
| 825    | octanoylcarnitine                          |                           | 56,396     | 54,946     |
| 639    | oleate (18:1n9)                            | <a href="#">HMDB00207</a> | 504,038    | 723,002    |
| 835    | oleoylcarnitine                            | <a href="#">HMDB05065</a> | 75,050     | 74,734     |

|                          |                  |                  |
|--------------------------|------------------|------------------|
| <b>SAMPLE NAME</b>       | DARM-00001       | DARM-00002       |
| <b>CLIENT IDENTIFIER</b> | NHSCi 2003 T2 D0 | NHSCi 2003 T2 D7 |
| <b>SAMPLE ID</b>         | 997731           | 997714           |
| <b>PARENT SAMPLE ID</b>  | 991346           | 991347           |
| <b>ACTUAL</b>            | NHSCi 2003 T2 D0 | NHSCi 2003 T2 D7 |
| <b>COND DAY</b>          | T2 D0            | T2 D7            |
| <b>BRADFORD PROTEIN</b>  | 168,571          | 179,95           |

**PATHWAY SORT**

| <b>ORDER</b> | <b>BIOCHEMICAL NAME</b>   | <b>Group HMDB</b>         | <b>T2 D0</b>  | <b>T2 D7</b>  |
|--------------|---------------------------|---------------------------|---------------|---------------|
| 285          | ophthalmate               | <a href="#">HMDB05765</a> | 116,806       | 21,847        |
| 244          | ornithine                 | <a href="#">HMDB03374</a> | 12,248,723    | 12,194,642    |
| 632          | palmitate (16:0)          | <a href="#">HMDB00220</a> | 5,527,414     | 8,850,880     |
| 633          | palmitoleate (16:1n7)     | <a href="#">HMDB03229</a> | 349,886       | 541,673       |
| 1004         | palmitoyl sphingomyelin   |                           | 14,824,070    | 13,545,406    |
| 833          | palmitoylcarnitine        |                           | 64,191        | 29,147        |
| 1243         | pantothenate              | <a href="#">HMDB00210</a> | 97,336        | 91,691        |
| 1613         | paraxanthine              | <a href="#">HMDB01860</a> | 520,139       | 445,282       |
| 88           | p-cresol sulfate          |                           | 81,049        | 73,182        |
| 621          | pelargonate (9:0)         | <a href="#">HMDB00847</a> | 170,061       | 292,268       |
| 631          | pentadecanoate (15:0)     | <a href="#">HMDB00826</a> | 164,538       | 256,296       |
| 135          | phenol sulfate            |                           | 22,748        | 21,602        |
| 128          | phenylacetylglutamine     | <a href="#">HMDB06344</a> | 83,959        | 75,806        |
| 83           | phenylalanine             | <a href="#">HMDB00159</a> | 8,846,152     | 8,204,792     |
| 602          | phosphate                 | <a href="#">HMDB01429</a> | 1,032,504,064 | 1,055,862,016 |
| 534          | phosphoenolpyruvate (PEP) | <a href="#">HMDB00263</a> | 464,449       | 166,197       |
| 877          | phosphoethanolamine       | <a href="#">HMDB00224</a> | 82,493        | 71,777        |
| 74           | pipecolate                | <a href="#">HMDB00070</a> | 107,952       | 92,948        |
| 1531         | piperine                  |                           | 97,887        | 107,407       |
| 246          | proline                   | <a href="#">HMDB00162</a> | 1,868,739     | 2,240,127     |
| 809          | propionylcarnitine        | <a href="#">HMDB00824</a> | 824,474       | 702,798       |
| 1181         | pseudouridine             | <a href="#">HMDB00767</a> | 14,590        | 12,637        |
| 45           | pyroglutamine*            |                           | 81,527        | 64,527        |
| 603          | pyrophosphate (PPi)       | <a href="#">HMDB00250</a> | 171,761       | 114,179       |

|                          |                  |                  |
|--------------------------|------------------|------------------|
| <b>SAMPLE NAME</b>       | DARM-00001       | DARM-00002       |
| <b>CLIENT IDENTIFIER</b> | NHSCi 2003 T2 D0 | NHSCi 2003 T2 D7 |
| <b>SAMPLE ID</b>         | 997731           | 997714           |
| <b>PARENT SAMPLE ID</b>  | 991346           | 991347           |
| <b>ACTUAL</b>            | NHSCi 2003 T2 D0 | NHSCi 2003 T2 D7 |
| <b>COND DAY</b>          | T2 D0            | T2 D7            |
| <b>BRADFORD PROTEIN</b>  | 168,571          | 179,95           |

**PATHWAY SORT**

| <b>ORDER</b> | <b>BIOCHEMICAL NAME</b>      | <b>Group HMDB</b>                   | T2 D0     | T2 D7     |
|--------------|------------------------------|-------------------------------------|-----------|-----------|
| 535          | pyruvate                     | <a href="#">HMDB00243</a>           | 1,815,000 | 3,412,879 |
| 1469         | ranitidine                   | <a href="#">HMDB01930</a>           | 366,122   | 357,222   |
| 548          | ribitol                      | <a href="#">HMDB00508</a>           | 190,964   | 165,369   |
| 557          | ribose 5-phosphate           | <a href="#">HMDB00618</a>           | 174,472   | 170,644   |
| 559          | ribulose                     | <a href="#">HMDB00621,HMDB03371</a> | 19,113    |           |
| 224          | S-adenosylhomocysteine (SAH) | <a href="#">HMDB00939</a>           | 138,810   | 191,407   |
| 551          | sedoheptulose-7-phosphate    | <a href="#">HMDB01068</a>           | 67,916    | 22,290    |
| 8            | serine                       | <a href="#">HMDB03406</a>           | 6,312,563 | 6,207,909 |
| 216          | S-methylcysteine             | <a href="#">HMDB02108</a>           | 188,357   | 196,891   |
| 281          | S-methylglutathione          |                                     | 39,472    | 24,727    |
| 270          | spermidine                   | <a href="#">HMDB01257</a>           | 1,003,105 | 942,647   |
| 1584         | stachydrine                  | <a href="#">HMDB04827</a>           | 187,777   | 130,368   |
| 637          | stearate (18:0)              | <a href="#">HMDB00827</a>           | 5,386,088 | 9,103,771 |
| 1005         | stearoyl sphingomyelin       | <a href="#">HMDB01348</a>           | 1,530,340 | 1,164,523 |
| 834          | stearoylcarnitine            | <a href="#">HMDB00848</a>           | 19,274    |           |
| 591          | succinylcarnitine            |                                     | 328,477   | 332,975   |
| 1662         | terephthalic acid            | <a href="#">HMDB02428</a>           | 284,825   | 189,503   |
| 1614         | theobromine                  | <a href="#">HMDB02825</a>           | 317,888   | 279,210   |
| 1615         | theophylline                 | <a href="#">HMDB01889</a>           | 123,980   | 186,516   |
| 549          | threitol                     | <a href="#">HMDB04136</a>           | 1,015,173 | 1,097,957 |
| 1199         | threonate                    | <a href="#">HMDB00943</a>           | 553,578   | 487,811   |
| 17           | threonine                    | <a href="#">HMDB00167</a>           | 166,448   | 163,121   |
| 252          | trans-4-hydroxyproline       | <a href="#">HMDB00725</a>           | 39,682    | 36,742    |

| PATHWAY SORT<br>ORDER | BIOCHEMICAL NAME                                | SAMPLE NAME               | DARM-00001       | DARM-00002       |
|-----------------------|-------------------------------------------------|---------------------------|------------------|------------------|
|                       |                                                 | CLIENT IDENTIFIER         | NHSCi 2003 T2 D0 | NHSCi 2003 T2 D7 |
|                       |                                                 | SAMPLE ID                 | 997731           | 997714           |
|                       |                                                 | PARENT SAMPLE ID          | 991346           | 991347           |
|                       |                                                 | ACTUAL                    | NHSCi 2003 T2 D0 | NHSCi 2003 T2 D7 |
|                       |                                                 | COND DAY                  | T2 D0            | T2 D7            |
|                       |                                                 | BRADFORD PROTEIN          | 168,571          | 179,95           |
|                       |                                                 | Group HMDB                | T2 D0            | T2 D7            |
| 501                   | trehalose                                       | <a href="#">HMDB00975</a> | 80,991           | 488,438          |
| 1242                  | trigonelline (N <sup>1</sup> -methylnicotinate) | <a href="#">HMDB00875</a> | 262,040          | 245,429          |
| 145                   | tryptophan                                      | <a href="#">HMDB00929</a> | 4,334,128        | 3,534,535        |
| 151                   | tryptophan betaine                              |                           | 1,527,459        | 1,476,027        |
| 99                    | tyrosine                                        | <a href="#">HMDB00158</a> | 2,068,021        | 1,810,748        |
| 1149                  | urate                                           | <a href="#">HMDB00289</a> | 180,006          | 175,475          |
| 245                   | urea                                            | <a href="#">HMDB00294</a> | 32,700,246       | 27,281,750       |
| 1180                  | uridine                                         | <a href="#">HMDB00296</a> | 13,411           | 21,360           |
| 190                   | valine                                          | <a href="#">HMDB00883</a> | 8,529,817        | 8,012,101        |
| 565                   | xylitol                                         | <a href="#">HMDB00568</a> |                  |                  |
| 570                   | xylonate                                        |                           | 53,934           | 53,665           |
| 569                   | xylose                                          | <a href="#">HMDB00098</a> | 108,343          |                  |

| PATHWAY SORT<br>ORDER | BIOCHEMICAL NAME                                   | DARM-00003        | DARM-00004        | DARM-00005        | DARM-00006       |
|-----------------------|----------------------------------------------------|-------------------|-------------------|-------------------|------------------|
|                       |                                                    | NHSCi 2003 T2 D14 | NHSCi 2003 T2 D21 | NHSCi 2003 T2 D28 | NHSCi 2003 T1 D0 |
|                       |                                                    | 997743            | 997745            | 997721            | 997727           |
|                       |                                                    | 991348            | 991349            | 991350            | 991351           |
|                       |                                                    | NHSCi 2003 T2 D14 | NHSCi 2003 T2 D21 | NHSCi 2003 T2 D28 | NHSCi 2003 T1 D0 |
|                       |                                                    | T2 D14            | T2 D21            | T2 D28            | T1 D0            |
|                       |                                                    | 177.746           | 178.439           | 181.508           | 193.651          |
|                       |                                                    | T2 D14            | T2 D21            | T2 D28            | T1 D0            |
| 905                   | 1,2-propanediol                                    | 8,051,589         | 7,677,646         | 9,385,429         | 597,231          |
| 532                   | 1,3-dihydroxyacetone                               | 116,949           | 78,807            | 64,825            | 76,373           |
| 515                   | 1,5-anhydroglucitol (1,5-AG)                       | 9,382,562         | 7,753,035         | 7,340,280         | 8,019,994        |
| 523                   | 1,6-anhydroglucose                                 | 270,657           | 368,639           | 345,543           | 301,535          |
| 636                   | 10-heptadecenoate (17:1n7)                         | 66,109            | 68,237            | 110,751           | 66,773           |
| 742                   | 13-methylmyristic acid                             | 133,631           | 124,948           | 169,573           | 48,932           |
| 744                   | 15-methylpalmitate (isobar with 2-methylpalmitate) | 262,782           | 235,729           | 364,262           | 136,907          |
| 919                   | 1-arachidonoylglycerophosphoethanolamine*          | 26,206            | 25,676            | 30,731            | 26,039           |
| 938                   | 1-linoleoylglycerophosphocholine                   | 221,573           | 229,916           | 307,841           | 260,253          |
| 926                   | 1-myristoylglycerophosphocholine                   | 30,969            | 152,570           | 51,715            |                  |
| 936                   | 1-oleoylglycerophosphocholine                      | 92,141            | 1,158,769         | 588,839           |                  |
| 915                   | 1-oleoylglycerophosphoethanolamine                 | 13,225            | 14,470            | 12,040            | 17,656           |
| 970                   | 1-palmitoylglycerol (1-monopalmitin)               | 40,748            | 41,028            | 35,678            | 33,251           |
| 929                   | 1-palmitoylglycerophosphocholine                   | 523,311           | 6,332,508         | 4,069,074         | 281,646          |
| 909                   | 1-palmitoylglycerophosphoethanolamine              | 20,110            | 23,692            | 23,426            | 16,617           |
| 934                   | 1-stearoylglycerophosphocholine                    | 241,127           | 2,352,217         | 1,270,107         | 136,578          |
| 533                   | 2,3-diphosphoglycerate                             | 34,908            | 8,377             | 7,875             | 570,388          |
| 263                   | 2-aminobutyrate                                    | 1,657,761         | 1,601,627         | 1,277,481         | 1,167,143        |
| 945                   | 2-arachidonoylglycerophosphocholine*               |                   | 294,864           |                   |                  |
| 920                   | 2-arachidonoylglycerophosphoethanolamine*          | 253,359           | 2,075,197         | 747,720           | 92,488           |
| 923                   | 2-docosahexaenoylglycerophosphoethanolamine*       | 77,956            | 388,022           | 235,282           | 32,009           |
| 922                   | 2-docosapentaenoylglycerophosphoethanolamine*      | 125,217           | 377,775           | 252,566           |                  |
| 1360                  | 2-ethylhexanoate (isobar with 2-propylpentanoate)  | 40,014            |                   |                   | 59,440           |
| 229                   | 2-hydroxybutyrate (AHB)                            | 1,335,219         | 1,444,275         | 1,148,063         | 1,377,727        |
| 714                   | 2-hydroxyglutarate                                 | 123,980           | 98,129            | 136,377           | 69,535           |
| 706                   | 2-hydroxypalmitate                                 | 49,809            | 39,241            | 61,456            | 27,626           |
| 939                   | 2-linoleoylglycerophosphocholine*                  |                   | 522,782           | 299,920           |                  |

| PATHWAY SORT<br>ORDER | BIOCHEMICAL NAME                         | DARM-00003        | DARM-00004        | DARM-00005        | DARM-00006       |
|-----------------------|------------------------------------------|-------------------|-------------------|-------------------|------------------|
|                       |                                          | NHSCi 2003 T2 D14 | NHSCi 2003 T2 D21 | NHSCi 2003 T2 D28 | NHSCi 2003 T1 D0 |
|                       |                                          | 997743            | 997745            | 997721            | 997727           |
|                       |                                          | 991348            | 991349            | 991350            | 991351           |
|                       |                                          | NHSCi 2003 T2 D14 | NHSCi 2003 T2 D21 | NHSCi 2003 T2 D28 | NHSCi 2003 T1 D0 |
|                       |                                          | T2 D14            | T2 D21            | T2 D28            | T1 D0            |
|                       |                                          | 177.746           | 178.439           | 181.508           | 193.651          |
|                       |                                          | T2 D14            | T2 D21            | T2 D28            | T1 D0            |
|                       | 202 2-methylbutyrocarnitine              | 52,946            | 42,758            | 60,727            | 65,388           |
|                       | 937 2-oleoylglycerophosphocholine*       | 35,455            | 241,064           | 125,842           |                  |
|                       | 930 2-palmitoylglycerophosphocholine*    | 45,335            | 651,755           | 268,904           | 29,782           |
|                       | 935 2-stearoylglycerophosphocholine*     |                   | 235,000           | 115,914           |                  |
|                       | 821 3-dehydrocarnitine*                  | 1,019,450         | 1,082,581         | 1,080,486         | 1,035,201        |
|                       | 170 3-indoxyl sulfate                    | 9,820             | 10,439            | 10,683            | 9,098            |
|                       | 172 3-methyl-2-oxobutyrate               | 49,853            | 37,613            | 33,197            | 16,717           |
|                       | 173 3-methyl-2-oxovalerate               | 67,151            | 65,721            | 56,937            | 34,771           |
|                       | 529 3-phosphoglycerate                   | 806,390           | 412,047           | 502,682           | 3,678,014        |
|                       | 193 4-methyl-2-oxopentanoate             | 148,392           | 116,731           | 109,200           | 68,101           |
|                       | 266 5-methylthioadenosine (MTA)          | 135,496           | 140,410           | 120,676           | 37,812           |
|                       | 282 5-oxoproline                         | 288,258           | 395,101           | 514,532           | 51,196           |
|                       | 545 6-phosphogluconate                   | 75,132            | 72,614            | 55,320            | 48,049           |
|                       | 1024 7-beta-hydroxycholesterol           | 31,754            | 44,742            | 30,148            | 11,625           |
|                       | 712.5 9,10-epoxyoctadec-12(Z)-enoic acid | 136,205           | 137,891           | 156,214           | 6,467            |
|                       | 672 9,10-epoxystearate                   | 6,637,511         | 6,963,358         | 8,534,965         | 228,260          |
|                       | 822 acetylcarnitine                      | 3,131,799         | 2,845,848         | 3,060,649         | 3,595,378        |
|                       | 601 acetylphosphate                      | 3,348,130         | 3,581,780         | 2,763,060         | 2,475,165        |
|                       | 1105 adenine                             | 27,343,090        | 22,142,156        | 18,066,456        | 45,361,896       |
|                       | 1106 adenosine                           | 16,563            | 22,620            | 34,703            | 26,151           |
|                       | 1116 adenosine 5'-diphosphate (ADP)      | 171,632           | 191,221           | 232,063           | 300,865          |
|                       | 1232 adenosine 5'diphosphoribose         | 120,812           | 112,168           | 111,040           | 130,405          |
|                       | 1114 adenosine 5'-monophosphate (AMP)    | 4,124,498         | 4,000,580         | 6,321,126         | 5,120,702        |
|                       | 665 adenate (22:4n6)                     | 67,195            | 98,837            | 94,853            | 30,373           |

| PATHWAY SORT<br>ORDER | BIOCHEMICAL NAME         | DARM-00003        | DARM-00004        | DARM-00005        | DARM-00006       |
|-----------------------|--------------------------|-------------------|-------------------|-------------------|------------------|
|                       |                          | NHSCi 2003 T2 D14 | NHSCi 2003 T2 D21 | NHSCi 2003 T2 D28 | NHSCi 2003 T1 D0 |
|                       |                          | 997743            | 997745            | 997721            | 997727           |
|                       |                          | 991348            | 991349            | 991350            | 991351           |
|                       |                          | NHSCi 2003 T2 D14 | NHSCi 2003 T2 D21 | NHSCi 2003 T2 D28 | NHSCi 2003 T1 D0 |
|                       |                          | T2 D14            | T2 D21            | T2 D28            | T1 D0            |
|                       |                          | 177.746           | 178.439           | 181.508           | 193.651          |
|                       |                          | T2 D14            | T2 D21            | T2 D28            | T1 D0            |
|                       |                          | 59,739,956        | 61,392,076        | 58,225,072        | 41,559,608       |
| 27                    | alanine                  |                   |                   |                   |                  |
| 1150                  | allantoin                | 29,024            | 17,404            | 30,483            | 27,655           |
| 179                   | alpha-hydroxyisocaproate | 100,719           | 221,084           | 384,224           |                  |
| 198                   | alpha-hydroxyisovalerate | 438,288           | 501,453           | 660,874           | 464,662          |
| 1266                  | alpha-tocopherol         | 277,769           | 285,258           | 215,883           | 207,352          |
| 1034                  | androsterone sulfate     | 5,868             | 5,622             | 5,121             | 5,870            |
| 566                   | arabinose                | 422,619           | 325,189           | 357,407           | 330,072          |
| 546                   | arabitol                 | 650,198           | 631,961           | 512,654           | 573,008          |
| 1202                  | arabonate                | 82,115            | 110,045           | 108,000           | 116,187          |
| 659                   | arachidonate (20:4n6)    | 686,066           | 821,476           | 1,533,608         | 875,136          |
| 241                   | arginine                 | 888,856           | 726,576           | 1,393,776         | 799,142          |
| 25                    | asparagine               | 1,190,101         | 1,147,523         | 847,738           | 1,213,263        |
| 24                    | aspartate                | 6,475,535         | 7,133,001         | 6,279,271         | 5,994,289        |
| 721                   | azelate (nonanedioate)   | 32,441            | 41,591            | 54,554            | 7,597            |
| 26                    | beta-alanine             | 94,272            | 92,691            | 63,966            | 52,945           |
| 7                     | beta-hydroxypyruvate     | 312,144           | 199,096           | 304,607           | 291,640          |
| 22                    | betaine                  | 1,224,881         | 1,213,351         | 1,091,302         | 1,268,964        |
| 1057                  | beta-sitosterol          | 15,749            | 34,902            | 16,481            | 25,809           |
| 1216                  | biliverdin               |                   | 40,654            | 22,159            | 20,846           |



| DARM-00003        | DARM-00004        | DARM-00005        | DARM-00006       |
|-------------------|-------------------|-------------------|------------------|
| NHSCi 2003 T2 D14 | NHSCi 2003 T2 D21 | NHSCi 2003 T2 D28 | NHSCi 2003 T1 D0 |
| 997743            | 997745            | 997721            | 997727           |
| 991348            | 991349            | 991350            | 991351           |
| NHSCi 2003 T2 D14 | NHSCi 2003 T2 D21 | NHSCi 2003 T2 D28 | NHSCi 2003 T1 D0 |
| T2 D14            | T2 D21            | T2 D28            | T1 D0            |
| 177.746           | 178.439           | 181.508           | 193.651          |

**PATHWAY SORT**

**ORDER**

**BIOCHEMICAL NAME**

|                                        | T2 D14      | T2 D21      | T2 D28      | T1 D0       |
|----------------------------------------|-------------|-------------|-------------|-------------|
| 811 butyrylcarnitine                   | 18,440      | 12,914      |             | 18,606      |
| 1612 caffeine                          | 2,755,255   | 2,649,273   | 2,555,892   | 2,809,313   |
| 1059 campesterol                       | 228,484     | 178,116     |             | 274,885     |
| 622 caprate (10:0)                     | 37,090      | 31,072      | 29,263      | 13,557      |
| 618 caproate (6:0)                     | 61,238      | 43,343      | 41,458      | 87,353      |
| 620 caprylate (8:0)                    | 61,964      | 42,845      | 49,939      | 32,025      |
| 820 carnitine                          | 823,844     | 802,720     | 810,327     | 748,275     |
| 1300 catechol sulfate                  | 91,434      | 84,050      | 82,170      | 87,304      |
| 164 C-glycosyltryptophan*              | 27,003      | 27,122      | 27,774      | 30,009      |
| 1020 cholesterol                       | 36,413,804  | 37,031,008  | 33,649,312  | 32,803,384  |
| 881 choline                            | 758,785     | 844,880     | 906,633     | 782,707     |
| 582 cis-aconitate                      | 971,813     | 965,590     | 1,091,042   | 634,631     |
| 641 cis-vaccenate (18:1n7)             | 103,745     | 137,179     | 194,116     | 115,498     |
| 579 citrate                            | 324,530,176 | 289,676,608 | 256,915,088 | 380,581,440 |
| 248 citrulline                         | 158,595     | 144,180     | 165,608     | 173,532     |
| 259 creatine                           | 3,155,329   | 3,110,639   | 3,065,868   | 3,188,870   |
| 260 creatinine                         | 368,395     | 396,776     | 310,196     | 370,502     |
| 213 cysteine                           | 854,325     | 1,614,778   | 1,506,844   | 421,175     |
| 819 deoxycarnitine                     | 540,779     | 475,548     | 514,399     | 578,492     |
| 655 dihomo-linoleate (20:2n6)          | 41,016      | 41,834      | 77,060      | 32,538      |
| 609 dihomo-linolenate (20:3n3 or n6)   | 72,443      | 85,727      | 153,773     | 82,068      |
| 531 dihydroxyacetone phosphate (DHAP)  | 20,946      | 40,825      |             | 3,139,871   |
| 3 dimethylglycine                      | 246,687     | 437,855     | 240,986     | 191,525     |
| 613 docosahexaenoate (DHA; 22:6n3)     | 158,153     | 210,643     | 370,969     | 137,766     |
| 611 docosapentaenoate (n3 DPA; 22:5n3) | 79,287      | 82,416      | 143,061     | 55,064      |
| 610 eicosapentaenoate (EPA; 20:5n3)    | 140,590     | 215,800     | 301,430     | 193,132     |
| 1565 ergothioneine                     | 497,357     | 461,335     | 520,948     | 539,562     |
| 735 erucamide                          | 206,975     | 497,591     | 207,158     | 129,960     |
| 1632 erythritol                        | 1,549,809   | 1,873,237   | 1,975,202   | 986,028     |
| 453 erythronate*                       | 456,321     | 497,722     | 470,756     | 313,095     |

|              |                                | DARM-00003        | DARM-00004        | DARM-00005        | DARM-00006       |
|--------------|--------------------------------|-------------------|-------------------|-------------------|------------------|
|              |                                | NHSCi 2003 T2 D14 | NHSCi 2003 T2 D21 | NHSCi 2003 T2 D28 | NHSCi 2003 T1 D0 |
|              |                                | 997743            | 997745            | 997721            | 997727           |
|              |                                | 991348            | 991349            | 991350            | 991351           |
| PATHWAY SORT |                                | NHSCi 2003 T2 D14 | NHSCi 2003 T2 D21 | NHSCi 2003 T2 D28 | NHSCi 2003 T1 D0 |
| ORDER        | BIOCHEMICAL NAME               | T2 D14            | T2 D21            | T2 D28            | T1 D0            |
| 876          | ethanolamine                   | 177,746           | 178,439           | 181,508           | 193,651          |
| 472          | fructose                       | 80,913,064        | 86,507,560        | 78,355,280        | 53,150,484       |
| 524          | fructose-6-phosphate           | 504,742           | 395,047           | 424,315           | 261,733          |
| 594          | fumarate                       | 271,306           | 297,773           | 418,249           | 312,444          |
| 404          | gamma-glutamylleucine          | 23,286            | 31,492            | 23,785            | 26,039           |
| 521          | glucose                        | 1,053,598,976     | 1,032,565,824     | 1,029,962,432     | 1,050,528,832    |
| 519          | glucose-6-phosphate (G6P)      | 1,583,868         | 930,779           | 1,246,771         | 114,535          |
| 39           | glutamate                      | 5,364,870         | 5,119,386         | 5,471,777         | 6,288,394        |
| 44           | glutamine                      | 1,462,849         | 1,421,720         | 1,185,657         | 1,966,634        |
| 80           | glutaroyl carnitine            | 9,352             |                   |                   | 12,120           |
| 283          | glutathione, oxidized (GSSG)   | 1,146,104         | 1,135,917         | 833,181           | 1,568,169        |
| 280          | glutathione, reduced (GSH)     | 26,106,000        | 22,982,382        | 17,035,302        | 26,459,132       |
| 517          | glycerate                      | 470,668           | 586,381           | 575,996           | 309,751          |
| 882          | glycerol 3-phosphate (G3P)     | 295,061           | 213,688           | 282,810           | 1,280,181        |
| 883          | glycerophosphorylcholine (GPC) | 148,839           | 150,884           | 168,429           | 155,419          |
| 1            | glycine                        | 43,565,284        | 53,847,536        | 62,256,112        | 28,291,758       |
| 851          | glycochenodeoxycholate         | 15,191            | 13,326            | 16,755            | 16,503           |
| 840          | glycocholate                   | 8,157             | 7,388             |                   | 7,500            |
| 849          | glycodeoxycholate              |                   | 11,419            | 10,286            |                  |
| 1318         | glycolate (hydroxyacetate)     | 465,396           | 478,215           | 395,415           | 380,381          |
| 1128         | guanosine                      | 41,014            | 34,133            | 38,393            | 41,859           |
| 1212         | heme*                          | 946,633           | 6,250,787         | 1,578,698         | 865,836          |
| 619          | heptanoate (7:0)               | 24,130            | 10,702            | 13,956            | 18,239           |
| 823          | hexanoylcarnitine              | 43,055            | 33,403            | 54,792            | 65,873           |
| 1288         | hippurate                      | 55,127            | 55,540            | 59,143            | 54,622           |
| 50           | histidine                      | 34,184            | 52,873            | 45,252            | 54,626           |

| PATHWAY SORT<br>ORDER | BIOCHEMICAL NAME                                                        | DARM-00003        | DARM-00004        | DARM-00005        | DARM-00006       |
|-----------------------|-------------------------------------------------------------------------|-------------------|-------------------|-------------------|------------------|
|                       |                                                                         | NHSCi 2003 T2 D14 | NHSCi 2003 T2 D21 | NHSCi 2003 T2 D28 | NHSCi 2003 T1 D0 |
|                       |                                                                         | 997743            | 997745            | 997721            | 997727           |
|                       |                                                                         | 991348            | 991349            | 991350            | 991351           |
|                       |                                                                         | NHSCi 2003 T2 D14 | NHSCi 2003 T2 D21 | NHSCi 2003 T2 D28 | NHSCi 2003 T1 D0 |
|                       |                                                                         | T2 D14            | T2 D21            | T2 D28            | T1 D0            |
|                       |                                                                         | 177.746           | 178.439           | 181.508           | 193.651          |
|                       |                                                                         | T2 D14            | T2 D21            | T2 D28            | T1 D0            |
|                       | 231 homocysteine                                                        | 48,090            | 76,061            | 65,983            | 19,970           |
|                       | 1585 homostachydrine*                                                   | 47,338            | 40,840            | 38,924            | 50,487           |
|                       | 206 hydroxyisovaleroyl carnitine                                        | 209,280           | 189,954           | 206,345           | 201,272          |
|                       | 1098 hypoxanthine                                                       | 1,190,940         | 3,661,084         | 6,129,222         | 366,999          |
|                       | 1101 inosine 5'-monophosphate (IMP)                                     | 269,325           | 175,203           | 195,010           | 82,146           |
|                       | Isobar: fructose 1,6-diphosphate, glucose 1,6-diphosphate, myo-inositol |                   |                   |                   |                  |
|                       | 527 1,4 or 1,3-diphosphate                                              | 71,000            | 58,710            | 67,460            | 329,423          |
|                       | 561 Isobar: ribulose 5-phosphate, xylulose 5-phosphate                  | 57,383            | 93,775            | 46,916            | 502,465          |
|                       | 496 Isobar: sorbitol, mannitol                                          | 20,448,232        | 19,889,494        | 17,503,946        | 19,898,894       |
|                       | 200 isobutyrylcarnitine                                                 | 137,471           | 127,764           | 121,604           | 169,915          |
|                       | 180 isoleucine                                                          | 4,536,709         | 4,544,457         | 4,538,633         | 4,536,955        |
|                       | 478 isomaltose                                                          | 2,297,650         | 1,930,628         | 1,563,279         | 1,479,343        |
|                       | 205 isovalerylcarnitine                                                 | 91,865            | 90,039            | 121,197           | 96,932           |
|                       | 144 kynurenine                                                          | 141,188           | 136,305           | 105,439           | 139,786          |
|                       | 536 lactate                                                             | 1,195,250,304     | 1,454,435,840     | 1,537,938,432     | 316,614,048      |
|                       | 1018 lathosterol                                                        | 116,987           | 77,676            | 76,679            | 68,518           |
|                       | 625 laurate (12:0)                                                      | 133,004           | 138,376           | 150,163           | 119,533          |
|                       | 181 leucine                                                             | 8,524,241         | 9,170,862         | 9,180,339         | 8,183,361        |

| DARM-00003        | DARM-00004        | DARM-00005        | DARM-00006       |
|-------------------|-------------------|-------------------|------------------|
| NHSCi 2003 T2 D14 | NHSCi 2003 T2 D21 | NHSCi 2003 T2 D28 | NHSCi 2003 T1 D0 |
| 997743            | 997745            | 997721            | 997727           |
| 991348            | 991349            | 991350            | 991351           |
| NHSCi 2003 T2 D14 | NHSCi 2003 T2 D21 | NHSCi 2003 T2 D28 | NHSCi 2003 T1 D0 |
| T2 D14            | T2 D21            | T2 D28            | T1 D0            |
| 177.746           | 178.439           | 181.508           | 193.651          |

**PATHWAY SORT**

| ORDER  | BIOCHEMICAL NAME                           | T2 D14     | T2 D21     | T2 D28     | T1 D0      |
|--------|--------------------------------------------|------------|------------|------------|------------|
| 604    | linoleate (18:2n6)                         | 2,017,285  | 2,277,671  | 3,763,954  | 1,935,023  |
| 608    | linolenate [alpha or gamma; (18:3n3 or 6)] | 523,412    | 511,629    | 726,080    | 530,840    |
| 69     | lysine                                     | 2,449,239  | 3,920,848  | 1,805,843  | 1,908,045  |
| 598    | malate                                     | 1,151,802  | 1,247,215  | 1,410,160  | 722,792    |
| 482    | maltose                                    | 1,244,747  | 1,238,197  | 1,089,176  | 1,109,965  |
| 487    | mannose                                    | 13,836,418 | 14,351,988 | 13,004,333 | 14,288,494 |
| 489    | mannose-6-phosphate                        | 278,036    | 224,649    | 208,880    | 122,657    |
| 635    | margarate (17:0)                           | 454,264    | 358,713    | 548,762    | 290,791    |
| 658    | mead acid (20:3n9)                         | 10,342     | 12,297     | 36,027     | 19,527     |
| 225    | methionine                                 | 591,278    | 442,776    | 412,237    | 910,720    |
| 890    | myo-inositol                               | 2,045,021  | 1,886,213  | 1,508,486  | 1,871,010  |
| 629    | myristate (14:0)                           | 846,052    | 704,453    | 856,844    | 365,057    |
| 630    | myristoleate (14:1n5)                      |            | 15,417     | 37,796     |            |
| 1242.1 | N1-Methyl-2-pyridone-5-carboxamide         | 299,484    | 200,879    | 219,238    | 247,312    |
| 75     | N-6-trimethyllysine                        | 125,710    | 108,226    | 88,378     | 81,227     |
| 4      | N-acetylglycine                            | 134,378    | 91,499     | 61,104     | 89,444     |
| 227    | N-acetylmethionine                         |            |            | 4,068      | 5,000      |
| 455    | N-acetylneuraminate                        | 82,934     | 111,325    | 81,073     | 41,976     |
| 1221   | nicotinamide                               | 2,839,631  | 3,421,625  | 2,577,569  | 2,419,713  |
| 1224   | nicotinamide adenine dinucleotide (NAD+)   | 3,646      | 7,612      | 3,594      | 5,164      |
| 825    | octanoylcarnitine                          | 66,639     | 68,985     | 65,843     | 49,823     |
| 639    | oleate (18:1n9)                            | 500,954    | 694,796    | 702,021    | 503,361    |
| 835    | oleoylcarnitine                            | 90,717     | 827,520    | 359,730    | 55,847     |

| DARM-00003        | DARM-00004        | DARM-00005        | DARM-00006       |
|-------------------|-------------------|-------------------|------------------|
| NHSCi 2003 T2 D14 | NHSCi 2003 T2 D21 | NHSCi 2003 T2 D28 | NHSCi 2003 T1 D0 |
| 997743            | 997745            | 997721            | 997727           |
| 991348            | 991349            | 991350            | 991351           |
| NHSCi 2003 T2 D14 | NHSCi 2003 T2 D21 | NHSCi 2003 T2 D28 | NHSCi 2003 T1 D0 |
| T2 D14            | T2 D21            | T2 D28            | T1 D0            |
| 177.746           | 178.439           | 181.508           | 193.651          |

**PATHWAY SORT**

| ORDER | BIOCHEMICAL NAME              | T2 D14        | T2 D21        | T2 D28        | T1 D0       |
|-------|-------------------------------|---------------|---------------|---------------|-------------|
|       | 285 ophthalmate               |               |               | 13,260        | 126,322     |
|       | 244 ornithine                 | 13,330,256    | 13,348,461    | 10,498,763    | 11,406,275  |
|       | 632 palmitate (16:0)          | 7,403,884     | 6,930,497     | 9,877,068     | 5,599,008   |
|       | 633 palmitoleate (16:1n7)     | 402,673       | 383,126       | 609,074       | 357,008     |
|       | 1004 palmitoyl sphingomyelin  | 15,296,857    | 15,483,889    | 13,799,316    | 13,666,355  |
|       | 833 palmitoylcarnitine        | 92,269        | 520,404       | 258,440       | 93,974      |
|       | 1243 pantothenate             | 96,511        | 88,079        | 92,747        | 97,366      |
|       | 1613 paraxanthine             | 581,962       | 600,267       | 498,181       | 517,976     |
|       | 88 p-cresol sulfate           | 77,606        | 71,521        | 78,245        | 79,054      |
|       | 621 pelargonate (9:0)         | 541,888       | 358,157       | 388,027       | 226,300     |
|       | 631 pentadecanoate (15:0)     | 230,847       | 218,632       | 297,162       | 159,741     |
|       | 135 phenol sulfate            | 21,654        | 19,965        | 19,700        | 23,306      |
|       | 128 phenylacetylglutamine     | 80,956        | 88,051        | 80,666        | 79,332      |
|       | 83 phenylalanine              | 10,777,701    | 10,596,395    | 9,766,167     | 9,265,584   |
|       | 602 phosphate                 | 1,290,286,208 | 1,289,449,088 | 1,203,603,456 | 825,421,632 |
|       | 534 phosphoenolpyruvate (PEP) | 55,665        | 22,811        | 39,021        | 519,173     |
|       | 877 phosphoethanolamine       | 99,221        |               | 65,013        | 95,268      |
|       | 74 pipecolate                 | 84,844        | 118,053       | 94,549        | 87,897      |
|       | 1531 piperine                 | 63,157        | 80,667        | 69,635        | 96,486      |
|       | 246 proline                   | 2,022,186     | 1,977,697     | 2,209,844     | 1,864,009   |
|       | 809 propionylcarnitine        | 707,248       | 591,287       | 635,194       | 769,841     |
|       | 1181 pseudouridine            | 10,690        | 9,596         | 11,550        | 8,068       |
|       | 45 pyroglutamine*             | 48,951        | 52,472        | 52,241        | 47,545      |
|       | 603 pyrophosphate (PPi)       | 120,252       | 94,482        | 36,279        | 160,293     |

| DARM-00003        | DARM-00004        | DARM-00005        | DARM-00006       |
|-------------------|-------------------|-------------------|------------------|
| NHSCi 2003 T2 D14 | NHSCi 2003 T2 D21 | NHSCi 2003 T2 D28 | NHSCi 2003 T1 D0 |
| 997743            | 997745            | 997721            | 997727           |
| 991348            | 991349            | 991350            | 991351           |
| NHSCi 2003 T2 D14 | NHSCi 2003 T2 D21 | NHSCi 2003 T2 D28 | NHSCi 2003 T1 D0 |
| T2 D14            | T2 D21            | T2 D28            | T1 D0            |
| 177.746           | 178.439           | 181.508           | 193.651          |

**PATHWAY SORT**

**ORDER            BIOCHEMICAL NAME**

| T2 D14    | T2 D21    | T2 D28    | T1 D0     |
|-----------|-----------|-----------|-----------|
| 3,584,718 | 1,392,119 | 883,286   | 104,646   |
| 353,255   | 323,947   | 395,306   | 356,947   |
| 264,230   | 170,760   | 262,227   | 199,769   |
| 125,607   | 110,047   | 92,336    | 327,343   |
| 21,528    | 29,620    | 5,901     | 36,306    |
| 218,707   | 180,852   | 240,547   | 136,466   |
| 155,997   | 106,611   | 27,985    |           |
| 6,923,332 | 7,240,069 | 6,777,029 | 5,980,283 |
| 207,436   | 225,249   | 203,359   | 155,595   |
| 27,584    | 38,256    | 30,161    | 39,962    |
| 1,226,414 | 1,160,830 | 1,181,574 | 993,676   |
| 195,394   | 208,634   | 222,209   | 201,641   |
| 7,954,844 | 7,000,055 | 9,915,066 | 5,389,298 |
| 1,229,736 | 1,340,268 | 1,390,094 | 1,200,951 |
| 78,930    | 363,625   | 178,108   |           |
| 366,863   | 359,724   | 404,492   | 323,401   |
| 204,796   | 226,146   | 211,575   | 199,968   |
| 354,120   | 262,534   | 291,833   | 324,486   |
| 119,772   | 69,244    | 109,118   | 126,037   |
| 1,389,832 | 1,438,844 | 1,303,130 | 1,083,124 |
| 577,713   | 520,950   | 565,903   | 422,204   |
| 168,561   | 167,515   | 185,889   | 162,617   |
| 36,611    | 42,912    | 37,583    | 41,882    |

535 pyruvate  
1469 ranitidine

548 ribitol

557 ribose 5-phosphate

559 ribulose

224 S-adenosylhomocysteine (SAH)

551 sedoheptulose-7-phosphate

8 serine

216 S-methylcysteine

281 S-methylglutathione

270 spermidine

1584 stachydrine

637 stearate (18:0)

1005 stearyl sphingomyelin

834 stearyl carnitine

591 succinyl carnitine

1662 terephthalic acid

1614 theobromine

1615 theophylline

549 threitol

1199 threonate

17 threonine

252 trans-4-hydroxyproline

| PATHWAY SORT<br>ORDER | BIOCHEMICAL NAME                                     | DARM-00003        | DARM-00004        | DARM-00005        | DARM-00006       |
|-----------------------|------------------------------------------------------|-------------------|-------------------|-------------------|------------------|
|                       |                                                      | NHSCi 2003 T2 D14 | NHSCi 2003 T2 D21 | NHSCi 2003 T2 D28 | NHSCi 2003 T1 D0 |
|                       |                                                      | 997743            | 997745            | 997721            | 997727           |
|                       |                                                      | 991348            | 991349            | 991350            | 991351           |
|                       |                                                      | NHSCi 2003 T2 D14 | NHSCi 2003 T2 D21 | NHSCi 2003 T2 D28 | NHSCi 2003 T1 D0 |
|                       |                                                      | T2 D14            | T2 D21            | T2 D28            | T1 D0            |
|                       |                                                      | 177.746           | 178.439           | 181.508           | 193.651          |
|                       |                                                      | T2 D14            | T2 D21            | T2 D28            | T1 D0            |
|                       | 501 trehalose                                        | 799,631           | 1,060,889         | 843,654           | 89,895           |
|                       | 1242 trigonelline (N <sup>1</sup> -methylnicotinate) | 250,669           | 258,900           | 252,621           | 274,003          |
|                       | 145 tryptophan                                       | 4,758,198         | 4,512,919         | 4,266,043         | 4,030,519        |
|                       | 151 tryptophan betaine                               | 1,525,838         | 1,428,182         | 1,520,371         | 1,534,749        |
|                       | 99 tyrosine                                          | 2,487,868         | 2,334,271         | 2,438,636         | 2,198,833        |
|                       | 1149 urate                                           | 166,337           | 150,014           | 177,883           | 186,934          |
|                       | 245 urea                                             | 34,699,208        | 32,933,632        | 30,938,074        | 30,904,742       |
|                       | 1180 uridine                                         | 22,838            | 25,675            | 34,453            | 23,251           |
|                       | 190 valine                                           | 9,654,649         | 9,108,516         | 9,098,879         | 9,146,812        |
|                       | 565 xylitol                                          |                   |                   |                   |                  |
|                       | 570 xylonate                                         | 81,607            | 73,825            | 102,421           | 100,853          |
|                       | 569 xylose                                           | 56,695            | 78,572            | 100,976           | 48,763           |

| PATHWAY SORT<br>ORDER | BIOCHEMICAL NAME                                       | DARM-00007       | DARM-00008        | DARM-00009        | DARM-00010        |
|-----------------------|--------------------------------------------------------|------------------|-------------------|-------------------|-------------------|
|                       |                                                        | NHSCi 2003 T1 D7 | NHSCi 2003 T1 D14 | NHSCi 2003 T1 D21 | NHSCi 2003 T1 D28 |
|                       |                                                        | 997730           | 997747            | 997713            | 997751            |
|                       |                                                        | 991352           | 991353            | 991354            | 991355            |
|                       |                                                        | NHSCi 2003 T1 D7 | NHSCi 2003 T1 D14 | NHSCi 2003 T1 D21 | NHSCi 2003 T1 D28 |
|                       |                                                        | T1 D7            | T1 D14            | T1 D21            | T1 D28            |
|                       |                                                        | 164.122          | 167.3             | 157.075           | 174.895           |
|                       |                                                        | T1 D7            | T1 D14            | T1 D21            | T1 D28            |
|                       | 905 1,2-propanediol                                    | 5,094,592        | 7,900,588         | 11,946,278        | 9,815,234         |
|                       | 532 1,3-dihydroxyacetone                               | 75,294           | 98,903            | 120,530           | 107,862           |
|                       | 515 1,5-anhydroglucitol (1,5-AG)                       | 8,514,238        | 7,066,326         | 11,814,922        | 6,724,714         |
|                       | 523 1,6-anhydroglucose                                 | 393,854          | 400,508           | 409,846           | 316,366           |
|                       | 636 10-heptadecenoate (17:1n7)                         | 77,209           | 76,842            | 89,804            | 68,109            |
|                       | 742 13-methylmyristic acid                             | 112,010          | 145,087           | 167,105           | 144,375           |
|                       | 744 15-methylpalmitate (isobar with 2-methylpalmitate) | 183,732          | 244,720           | 287,861           | 217,988           |
|                       | 919 1-arachidonoylglycerophosphoethanolamine*          | 26,056           | 27,509            | 36,945            | 20,343            |
|                       | 938 1-linoleoylglycerophosphocholine                   | 228,535          | 240,843           | 503,766           | 217,971           |
|                       | 926 1-myristoylglycerophosphocholine                   | 27,955           | 198,316           | 171,105           | 384,103           |
|                       | 936 1-oleoylglycerophosphocholine                      | 249,026          | 805,615           | 1,160,093         | 1,969,326         |
|                       | 915 1-oleoylglycerophosphoethanolamine                 | 24,152           | 5,933             | 32,349            | 11,154            |
|                       | 970 1-palmitoylglycerol (1-monopalmitin)               | 28,985           | 44,659            | 32,712            | 41,689            |
|                       | 929 1-palmitoylglycerophosphocholine                   | 1,681,923        | 4,234,489         | 7,516,405         | 8,921,981         |
|                       | 909 1-palmitoylglycerophosphoethanolamine              | 21,884           | 15,622            | 42,151            | 18,028            |
|                       | 934 1-stearoylglycerophosphocholine                    | 557,194          | 3,471,942         | 2,495,278         | 5,419,792         |
|                       | 533 2,3-diphosphoglycerate                             | 514,005          | 406,442           | 275,816           | 82,205            |
|                       | 263 2-aminobutyrate                                    | 1,499,061        | 1,522,610         | 1,906,989         | 1,587,369         |
|                       | 945 2-arachidonoylglycerophosphocholine*               | 69,971           | 428,855           | 179,266           | 806,039           |
|                       | 920 2-arachidonoylglycerophosphoethanolamine*          | 438,495          | 2,678,412         | 1,323,412         | 3,686,134         |
|                       | 923 2-docosahexaenoylglycerophosphoethanolamine*       | 134,999          | 727,344           | 447,247           | 1,125,461         |
|                       | 922 2-docosapentaenoylglycerophosphoethanolamine*      | 185,020          | 841,336           | 370,519           | 939,739           |
|                       | 1360 2-ethylhexanoate (isobar with 2-propylpentanoate) | 49,315           | 40,013            | 34,710            | 17,847            |
|                       | 229 2-hydroxybutyrate (AHB)                            | 1,380,591        | 1,329,590         | 1,652,279         | 1,242,529         |
|                       | 714 2-hydroxyglutarate                                 | 115,986          | 115,174           | 184,819           | 166,854           |
|                       | 706 2-hydroxypalmitate                                 | 40,420           | 47,330            | 120,951           | 46,619            |
|                       | 939 2-linoleoylglycerophosphocholine*                  |                  | 666,996           | 288,542           | 912,955           |



|                                          | DARM-00007       | DARM-00008        | DARM-00009        | DARM-00010        |
|------------------------------------------|------------------|-------------------|-------------------|-------------------|
|                                          | NHSCi 2003 T1 D7 | NHSCi 2003 T1 D14 | NHSCi 2003 T1 D21 | NHSCi 2003 T1 D28 |
|                                          | 997730           | 997747            | 997713            | 997751            |
|                                          | 991352           | 991353            | 991354            | 991355            |
|                                          | NHSCi 2003 T1 D7 | NHSCi 2003 T1 D14 | NHSCi 2003 T1 D21 | NHSCi 2003 T1 D28 |
|                                          | T1 D7            | T1 D14            | T1 D21            | T1 D28            |
|                                          | 164.122          | 167.3             | 157.075           | 174.895           |
|                                          | T1 D7            | T1 D14            | T1 D21            | T1 D28            |
| 202 2-methylbutyrylcarnitine             | 47,597           | 30,227            | 58,976            | 41,719            |
| 937 2-oleoylglycerophosphocholine*       | 55,909           | 227,409           | 218,731           | 484,871           |
| 930 2-palmitoylglycerophosphocholine*    | 107,736          | 850,966           | 500,430           | 1,320,038         |
| 935 2-stearoylglycerophosphocholine*     | 52,478           | 224,465           | 116,539           | 342,063           |
| 821 3-dehydrocarnitine*                  | 1,016,691        | 982,362           | 1,153,383         | 1,023,845         |
| 170 3-indoxyl sulfate                    | 8,908            | 10,598            | 10,032            | 8,388             |
| 172 3-methyl-2-oxobutyrate               | 10,308           |                   | 8,238             | 12,970            |
| 173 3-methyl-2-oxovalerate               | 22,455           | 12,098            | 14,312            | 12,557            |
| 529 3-phosphoglycerate                   | 3,001,350        | 2,379,128         | 1,254,461         | 684,644           |
| 193 4-methyl-2-oxopentanoate             | 45,223           | 20,461            | 30,765            | 24,861            |
| 266 5-methylthioadenosine (MTA)          | 106,068          | 141,550           | 121,991           | 116,200           |
| 282 5-oxoproline                         | 248,409          | 316,581           | 487,200           | 465,612           |
| 545 6-phosphogluconate                   | 87,787           | 116,731           | 157,278           | 50,683            |
| 1024 7-beta-hydroxycholesterol           | 24,651           | 24,894            | 51,849            | 48,199            |
| 712.5 9,10-epoxyoctadec-12(Z)-enoic acid | 80,921           | 148,527           | 137,264           | 145,151           |
| 672 9,10-epoxystearate                   | 5,273,860        | 7,416,512         | 10,051,883        | 7,850,631         |
| 822 acetylcarnitine                      | 3,482,386        | 2,957,871         | 2,943,287         | 2,463,402         |
| 601 acetylphosphate                      | 3,116,020        | 2,916,298         | 3,536,594         | 2,858,083         |
| 1105 adenine                             | 42,820,164       | 35,164,124        | 32,958,494        | 22,692,290        |
| 1106 adenosine                           | 39,606           | 50,679            | 53,112            | 47,176            |
| 1116 adenosine 5'-diphosphate (ADP)      | 174,757          | 112,277           | 180,872           | 116,869           |
| 1232 adenosine 5'diphosphoribose         | 140,137          | 133,202           | 129,905           | 108,365           |
| 1114 adenosine 5'-monophosphate (AMP)    | 3,384,504        | 1,818,121         | 5,602,308         | 3,526,180         |
| 665 adenate (22:4n6)                     | 134,402          | 40,015            | 65,717            | 54,909            |

**PATHWAY SORT**

**ORDER                      BIOCHEMICAL NAME**

| PATHWAY SORT<br>ORDER | BIOCHEMICAL NAME             | DARM-00007       | DARM-00008        | DARM-00009        | DARM-00010        |
|-----------------------|------------------------------|------------------|-------------------|-------------------|-------------------|
|                       |                              | NHSCi 2003 T1 D7 | NHSCi 2003 T1 D14 | NHSCi 2003 T1 D21 | NHSCi 2003 T1 D28 |
|                       |                              | 997730           | 997747            | 997713            | 997751            |
|                       |                              | 991352           | 991353            | 991354            | 991355            |
|                       |                              | NHSCi 2003 T1 D7 | NHSCi 2003 T1 D14 | NHSCi 2003 T1 D21 | NHSCi 2003 T1 D28 |
|                       |                              | T1 D7            | T1 D14            | T1 D21            | T1 D28            |
|                       |                              | 164.122          | 167.3             | 157.075           | 174.895           |
|                       |                              | T1 D7            | T1 D14            | T1 D21            | T1 D28            |
|                       | 27 alanine                   | 46,026,540       | 46,403,848        | 61,844,304        | 50,513,772        |
|                       | 1150 allantoin               | 15,691           | 16,447            | 36,580            | 12,260            |
|                       | 179 alpha-hydroxyisocaproate | 144,415          | 197,291           | 312,352           | 293,435           |
|                       | 198 alpha-hydroxyisovalerate | 1,037,016        | 1,425,137         | 2,069,952         | 1,720,625         |
|                       | 1266 alpha-tocopherol        | 183,533          | 274,439           | 378,019           | 239,099           |
|                       | 1034 androsterone sulfate    | 4,883            |                   | 5,621             | 5,827             |
|                       | 566 arabinose                | 464,449          | 421,330           | 533,174           | 357,514           |
|                       | 546 arabitol                 | 858,582          | 791,148           | 995,548           | 828,324           |
|                       | 1202 arabonate               | 112,045          | 106,724           | 177,292           | 90,025            |
|                       | 659 arachidonate (20:4n6)    | 819,615          | 672,532           | 1,159,407         | 996,120           |
|                       | 241 arginine                 | 996,958          | 819,233           | 1,031,571         | 935,909           |
|                       | 25 asparagine                | 1,076,330        | 1,060,803         | 1,280,762         | 1,024,284         |
|                       | 24 aspartate                 | 7,078,996        | 7,557,151         | 9,547,111         | 7,674,739         |
|                       | 721 azelate (nonanedioate)   | 19,025           | 33,353            | 46,882            | 54,019            |
|                       | 26 beta-alanine              | 53,465           | 67,742            | 104,855           | 91,048            |
|                       | 7 beta-hydroxypyruvate       | 324,165          | 304,194           | 330,819           | 262,537           |
|                       | 22 betaine                   | 1,264,345        | 1,284,799         | 1,309,027         | 1,337,286         |
|                       | 1057 beta-sitosterol         |                  | 49,466            | 44,720            | 28,975            |
|                       | 1216 biliverdin              | 25,074           | 75,380            | 30,880            | 69,288            |

| DARM-00007       | DARM-00008        | DARM-00009        | DARM-00010        |
|------------------|-------------------|-------------------|-------------------|
| NHSCi 2003 T1 D7 | NHSCi 2003 T1 D14 | NHSCi 2003 T1 D21 | NHSCi 2003 T1 D28 |
| 997730           | 997747            | 997713            | 997751            |
| 991352           | 991353            | 991354            | 991355            |
| NHSCi 2003 T1 D7 | NHSCi 2003 T1 D14 | NHSCi 2003 T1 D21 | NHSCi 2003 T1 D28 |
| T1 D7            | T1 D14            | T1 D21            | T1 D28            |
| 164.122          | 167.3             | 157.075           | 174.895           |

**PATHWAY SORT**

**ORDER            BIOCHEMICAL NAME**

| T1 D7                                  | T1 D14      | T1 D21      | T1 D28      |
|----------------------------------------|-------------|-------------|-------------|
| 811 butyrylcarnitine                   | 18,993      |             | 18,555      |
| 1612 caffeine                          | 2,671,487   | 2,501,316   | 3,004,181   |
| 1059 campesterol                       |             | 126,048     | 183,062     |
| 622 caprate (10:0)                     | 28,993      | 30,427      | 35,743      |
| 618 caproate (6:0)                     | 77,649      | 53,301      | 53,011      |
| 620 caprylate (8:0)                    | 42,353      | 55,138      | 42,464      |
| 820 carnitine                          | 792,332     | 801,493     | 733,487     |
| 1300 catechol sulfate                  | 83,229      | 82,922      | 90,053      |
| 164 C-glycosyltryptophan*              | 27,480      | 21,865      | 20,682      |
| 1020 cholesterol                       | 32,736,830  | 35,737,660  | 43,877,268  |
| 881 choline                            | 949,016     | 852,487     | 985,493     |
| 582 cis-aconitate                      | 890,339     | 909,508     | 1,152,958   |
| 641 cis-vaccenate (18:1n7)             |             |             | 250,397     |
| 579 citrate                            | 345,310,752 | 317,354,048 | 344,202,304 |
| 248 citrulline                         | 151,995     | 152,676     | 158,868     |
| 259 creatine                           | 3,105,707   | 3,087,004   | 3,193,254   |
| 260 creatinine                         | 269,770     | 372,679     | 391,820     |
| 213 cysteine                           | 480,046     | 758,948     | 1,519,907   |
| 819 deoxycarnitine                     | 497,989     | 534,404     | 555,496     |
| 655 dihomo-linoleate (20:2n6)          | 49,672      | 43,052      | 64,917      |
| 609 dihomo-linolenate (20:3n3 or n6)   | 84,867      | 72,285      | 120,602     |
| 531 dihydroxyacetone phosphate (DHAP)  | 3,737,129   | 740,411     | 162,486     |
| 3 dimethylglycine                      | 258,305     | 296,444     | 240,992     |
| 613 docosahexaenoate (DHA; 22:6n3)     | 168,444     | 163,981     | 235,179     |
| 611 docosapentaenoate (n3 DPA; 22:5n3) | 57,715      | 68,934      | 88,767      |
| 610 eicosapentaenoate (EPA; 20:5n3)    | 233,741     | 195,426     | 233,767     |
| 1565 ergothioneine                     | 489,496     | 433,692     | 555,621     |
| 735 erucamide                          |             | 552,061     | 176,649     |
| 1632 erythritol                        | 1,346,993   | 2,164,535   | 4,162,346   |
| 453 erythronate*                       | 446,768     | 738,985     | 1,482,815   |

|                                    | DARM-00007       | DARM-00008        | DARM-00009        | DARM-00010        |
|------------------------------------|------------------|-------------------|-------------------|-------------------|
|                                    | NHSCi 2003 T1 D7 | NHSCi 2003 T1 D14 | NHSCi 2003 T1 D21 | NHSCi 2003 T1 D28 |
|                                    | 997730           | 997747            | 997713            | 997751            |
|                                    | 991352           | 991353            | 991354            | 991355            |
|                                    | NHSCi 2003 T1 D7 | NHSCi 2003 T1 D14 | NHSCi 2003 T1 D21 | NHSCi 2003 T1 D28 |
| T1 D7                              | T1 D14           | T1 D21            | T1 D28            |                   |
|                                    | 164.122          | 167.3             | 157.075           | 174.895           |
| T1 D7                              | T1 D14           | T1 D21            | T1 D28            |                   |
| 876 ethanolamine                   | 555,903          | 686,214           | 1,165,937         | 1,020,568         |
| 472 fructose                       | 50,109,964       | 55,323,568        | 102,091,968       | 98,700,936        |
| 524 fructose-6-phosphate           | 296,830          | 641,289           | 646,186           | 519,872           |
| 594 fumarate                       | 369,912          | 414,751           | 760,435           | 408,083           |
| 404 gamma-glutamylleucine          | 27,997           | 32,365            | 26,144            | 25,162            |
| 521 glucose                        | 1,020,776,448    | 997,357,184       | 1,139,034,240     | 964,054,976       |
| 519 glucose-6-phosphate (G6P)      | 180,720          | 736,716           | 1,722,416         | 1,327,185         |
| 39 glutamate                       | 5,533,269        | 5,249,449         | 6,124,830         | 4,963,277         |
| 44 glutamine                       | 1,389,451        | 1,211,024         | 897,463           | 921,205           |
| 80 glutaroyl carnitine             |                  | 20,420            | 17,809            |                   |
| 283 glutathione, oxidized (GSSG)   | 1,267,565        | 958,516           | 877,904           | 797,820           |
| 280 glutathione, reduced (GSH)     | 23,101,658       | 22,202,784        | 15,096,875        | 15,510,460        |
| 517 glycerate                      | 1,121,733        | 2,107,712         | 3,489,274         | 3,304,614         |
| 882 glycerol 3-phosphate (G3P)     | 1,634,444        | 877,318           | 549,688           | 297,549           |
| 883 glycerophosphorylcholine (GPC) | 130,572          | 140,299           | 155,496           | 159,310           |
| 1 glycine                          | 33,825,676       | 36,850,828        | 54,430,340        | 51,906,536        |
| 851 glycochenodeoxycholate         | 16,089           | 15,842            | 20,762            | 16,422            |
| 840 glycocholate                   | 4,709            |                   | 3,415             | 6,331             |
| 849 glycodeoxycholate              |                  | 12,180            | 15,682            |                   |
| 1318 glycolate (hydroxyacetate)    | 439,427          | 365,340           | 568,437           | 448,191           |
| 1128 guanosine                     | 48,753           | 35,829            | 44,277            | 27,753            |
| 1212 heme*                         | 2,080,469        | 11,383,302        | 2,772,017         | 9,742,363         |
| 619 heptanoate (7:0)               | 19,019           | 19,535            | 18,253            | 9,481             |
| 823 hexanoylcarnitine              | 32,860           | 35,522            | 61,577            | 62,579            |
| 1288 hippurate                     | 56,806           | 55,854            | 64,295            | 55,423            |
| 50 histidine                       | 35,235           | 35,498            | 53,561            | 46,513            |

**PATHWAY SORT**

**ORDER BIOCHEMICAL NAME**

| PATHWAY SORT<br>ORDER | BIOCHEMICAL NAME                                                        | DARM-00007       | DARM-00008        | DARM-00009        | DARM-00010        |
|-----------------------|-------------------------------------------------------------------------|------------------|-------------------|-------------------|-------------------|
|                       |                                                                         | NHSCi 2003 T1 D7 | NHSCi 2003 T1 D14 | NHSCi 2003 T1 D21 | NHSCi 2003 T1 D28 |
|                       |                                                                         | 997730           | 997747            | 997713            | 997751            |
|                       |                                                                         | 991352           | 991353            | 991354            | 991355            |
|                       |                                                                         | NHSCi 2003 T1 D7 | NHSCi 2003 T1 D14 | NHSCi 2003 T1 D21 | NHSCi 2003 T1 D28 |
|                       |                                                                         | T1 D7            | T1 D14            | T1 D21            | T1 D28            |
|                       |                                                                         | 164.122          | 167.3             | 157.075           | 174.895           |
|                       |                                                                         | T1 D7            | T1 D14            | T1 D21            | T1 D28            |
|                       | 231 homocysteine                                                        | 31,950           | 68,226            | 136,585           | 78,872            |
|                       | 1585 homostachydrine*                                                   | 33,072           | 52,929            | 41,901            | 49,128            |
|                       | 206 hydroxyisovaleroyl carnitine                                        | 197,479          | 198,639           | 214,187           | 192,114           |
|                       | 1098 hypoxanthine                                                       | 22,240,624       | 23,073,438        | 30,759,420        | 24,490,568        |
|                       | 1101 inosine 5'-monophosphate (IMP)                                     | 157,625          | 295,160           | 429,261           | 364,028           |
|                       | Isobar: fructose 1,6-diphosphate, glucose 1,6-diphosphate, myo-inositol |                  |                   |                   |                   |
|                       | 527 1,4 or 1,3-diphosphate                                              | 487,307          | 90,518            | 45,262            | 36,914            |
|                       | 561 Isobar: ribulose 5-phosphate, xylulose 5-phosphate                  | 425,998          | 310,659           | 84,013            | 43,295            |
|                       | 496 Isobar: sorbitol, mannitol                                          | 19,533,746       | 19,461,080        | 17,323,574        | 18,599,532        |
|                       | 200 isobutyrylcarnitine                                                 | 136,413          | 107,830           | 135,775           | 109,241           |
|                       | 180 isoleucine                                                          | 5,410,337        | 5,613,187         | 5,777,075         | 5,520,644         |
|                       | 478 isomaltose                                                          | 2,415,596        | 1,876,714         | 2,429,082         | 1,792,855         |
|                       | 205 isovalerylcarnitine                                                 | 92,686           | 88,859            | 98,716            | 96,003            |
|                       | 144 kynurenine                                                          | 148,929          | 165,805           | 118,761           | 132,904           |
|                       | 536 lactate                                                             | 1,020,426,624    | 1,586,645,376     | 2,372,599,808     | 2,221,599,488     |
|                       | 1018 lathosterol                                                        | 94,639           | 79,268            | 69,071            | 114,548           |
|                       | 625 laurate (12:0)                                                      | 122,574          | 129,266           | 124,453           | 124,539           |
|                       | 181 leucine                                                             | 9,541,025        | 10,279,834        | 11,479,407        | 10,036,593        |

|                                                | DARM-00007       | DARM-00008        | DARM-00009        | DARM-00010        |
|------------------------------------------------|------------------|-------------------|-------------------|-------------------|
|                                                | NHSCi 2003 T1 D7 | NHSCi 2003 T1 D14 | NHSCi 2003 T1 D21 | NHSCi 2003 T1 D28 |
|                                                | 997730           | 997747            | 997713            | 997751            |
|                                                | 991352           | 991353            | 991354            | 991355            |
|                                                | NHSCi 2003 T1 D7 | NHSCi 2003 T1 D14 | NHSCi 2003 T1 D21 | NHSCi 2003 T1 D28 |
| T1 D7                                          | T1 D14           | T1 D21            | T1 D28            |                   |
|                                                | 164.122          | 167.3             | 157.075           | 174.895           |
| ORDER                                          | T1 D7            | T1 D14            | T1 D21            | T1 D28            |
| 604 linoleate (18:2n6)                         | 2,334,804        | 2,267,921         | 3,710,364         | 2,700,794         |
| 608 linolenate [alpha or gamma; (18:3n3 or 6)] | 538,085          | 528,911           | 643,149           | 647,742           |
| 69 lysine                                      | 2,062,752        | 2,778,876         | 3,292,959         | 3,042,442         |
| 598 malate                                     | 1,538,423        | 2,000,477         | 3,044,240         | 1,877,331         |
| 482 maltose                                    | 1,299,784        | 1,205,586         | 1,626,218         | 1,099,212         |
| 487 mannose                                    | 12,503,923       | 12,644,893        | 16,777,872        | 12,748,232        |
| 489 mannose-6-phosphate                        | 155,536          | 266,746           | 403,017           | 210,633           |
| 635 margarate (17:0)                           | 374,345          | 469,249           | 508,347           | 340,769           |
| 658 mead acid (20:3n9)                         | 21,454           | 17,829            | 22,165            | 15,984            |
| 225 methionine                                 | 675,726          | 518,109           | 424,411           | 379,467           |
| 890 myo-inositol                               | 1,830,739        | 1,937,274         | 2,220,758         | 1,926,134         |
| 629 myristate (14:0)                           | 614,971          | 753,272           | 899,579           | 658,672           |
| 630 myristoleate (14:1n5)                      |                  | 20,243            | 25,641            | 24,885            |
| 1242.1 N1-Methyl-2-pyridone-5-carboxamide      | 255,045          | 328,963           | 197,700           | 208,504           |
| 75 N-6-trimethyllysine                         | 118,028          | 104,812           | 88,531            | 117,878           |
| 4 N-acetylglycine                              | 129,534          | 82,324            | 129,186           | 81,418            |
| 227 N-acetylmethionine                         |                  |                   | 4,569             | 3,814             |
| 455 N-acetylneuraminate                        | 81,863           | 71,474            | 145,262           | 161,975           |
| 1221 nicotinamide                              | 3,091,146        | 2,345,408         | 2,440,477         | 3,025,345         |
| 1224 nicotinamide adenine dinucleotide (NAD+)  | 5,818            | 3,417             | 3,167             | 2,659             |
| 825 octanoylcarnitine                          | 50,620           | 58,888            | 74,802            | 70,794            |
| 639 oleate (18:1n9)                            | 668,373          | 1,037,370         | 869,825           | 727,692           |
| 835 oleoylcarnitine                            | 176,499          | 1,896,469         | 814,920           | 3,297,641         |

**PATHWAY SORT**

**ORDER**

**BIOCHEMICAL NAME**

|       | DARM-00007       | DARM-00008        | DARM-00009        | DARM-00010        |
|-------|------------------|-------------------|-------------------|-------------------|
|       | NHSCi 2003 T1 D7 | NHSCi 2003 T1 D14 | NHSCi 2003 T1 D21 | NHSCi 2003 T1 D28 |
|       | 997730           | 997747            | 997713            | 997751            |
|       | 991352           | 991353            | 991354            | 991355            |
|       | NHSCi 2003 T1 D7 | NHSCi 2003 T1 D14 | NHSCi 2003 T1 D21 | NHSCi 2003 T1 D28 |
| T1 D7 | T1 D14           | T1 D21            | T1 D28            |                   |
|       | 164.122          | 167.3             | 157.075           | 174.895           |
| T1 D7 | T1 D14           | T1 D21            | T1 D28            |                   |
|       | 48,362           | 17,632            |                   |                   |
|       | 11,180,306       | 12,310,781        | 16,416,260        | 13,502,701        |
|       | 6,535,080        | 8,036,350         | 11,042,204        | 7,455,168         |
|       | 468,814          | 489,618           | 894,550           | 476,559           |
|       | 14,373,302       | 14,891,052        | 19,737,722        | 15,219,238        |
|       | 167,796          | 994,773           | 477,062           | 2,072,686         |
|       | 93,473           | 99,085            | 117,185           | 124,715           |
|       | 521,128          | 623,131           | 518,359           | 563,460           |
|       | 73,964           | 76,929            | 90,547            | 75,245            |
|       | 416,123          | 432,364           | 388,122           | 260,585           |
|       | 199,998          | 216,880           | 280,835           | 198,601           |
|       | 19,545           | 21,133            | 20,674            | 19,955            |
|       | 89,135           | 83,598            | 87,730            | 73,734            |
|       | 10,171,755       | 10,241,136        | 9,943,871         | 10,824,778        |
|       | 761,357,696      | 801,848,512       | 1,235,966,976     | 1,119,354,496     |
|       | 407,874          | 315,930           | 207,764           | 91,637            |
|       |                  |                   | 71,275            |                   |
|       | 101,955          | 110,178           | 89,147            | 101,775           |
|       | 85,404           | 67,334            | 100,405           | 80,905            |
|       | 1,854,912        | 1,822,370         | 2,373,863         | 2,105,123         |
|       | 660,785          | 510,463           | 599,475           | 418,053           |
|       | 7,088            | 10,312            | 14,090            | 9,576             |
|       | 64,256           | 38,425            | 68,071            | 80,202            |
|       | 61,129           | 76,329            | 82,322            | 35,852            |

**PATHWAY SORT**

**ORDER      BIOCHEMICAL NAME**

285 ophthalmate

244 ornithine

632 palmitate (16:0)

633 palmitoleate (16:1n7)

1004 palmitoyl sphingomyelin

833 palmitoylcarnitine

1243 pantothenate

1613 paraxanthine

88 p-cresol sulfate

621 pelargonate (9:0)

631 pentadecanoate (15:0)

135 phenol sulfate

128 phenylacetylglutamine

83 phenylalanine

602 phosphate

534 phosphoenolpyruvate (PEP)

877 phosphoethanolamine

74 pipecolate

1531 piperine

246 proline

809 propionylcarnitine

1181 pseudouridine

45 pyroglutamine\*

603 pyrophosphate (PPi)

| DARM-00007       | DARM-00008        | DARM-00009        | DARM-00010        |
|------------------|-------------------|-------------------|-------------------|
| NHSCi 2003 T1 D7 | NHSCi 2003 T1 D14 | NHSCi 2003 T1 D21 | NHSCi 2003 T1 D28 |
| 997730           | 997747            | 997713            | 997751            |
| 991352           | 991353            | 991354            | 991355            |
| NHSCi 2003 T1 D7 | NHSCi 2003 T1 D14 | NHSCi 2003 T1 D21 | NHSCi 2003 T1 D28 |
| T1 D7            | T1 D14            | T1 D21            | T1 D28            |
| 164.122          | 167.3             | 157.075           | 174.895           |

**PATHWAY SORT**

**ORDER                      BIOCHEMICAL NAME**

| T1 D7                            | T1 D14    | T1 D21    | T1 D28     |           |
|----------------------------------|-----------|-----------|------------|-----------|
| 535 pyruvate                     | 161,832   | 212,563   | 3,380,472  | 5,669,102 |
| 1469 ranitidine                  | 353,058   | 350,556   | 432,854    | 336,545   |
| 548 ribitol                      | 952,774   | 1,106,672 | 1,510,853  | 1,272,448 |
| 557 ribose 5-phosphate           | 336,985   | 312,301   | 206,851    | 114,607   |
| 559 ribulose                     | 78,066    | 39,733    | 36,408     | 22,491    |
| 224 S-adenosylhomocysteine (SAH) | 183,611   | 166,709   | 197,505    | 193,656   |
| 551 sedoheptulose-7-phosphate    |           | 4,142     | 19,453     | 65,317    |
| 8 serine                         | 6,583,504 | 7,134,192 | 9,398,409  | 8,111,226 |
| 216 S-methylcysteine             | 159,794   | 245,038   | 297,871    | 220,667   |
| 281 S-methylglutathione          | 39,255    | 34,424    | 28,687     | 20,016    |
| 270 spermidine                   | 912,683   | 1,012,005 | 1,172,137  | 1,056,876 |
| 1584 stachydrine                 | 191,830   | 175,462   | 203,083    | 135,447   |
| 637 stearate (18:0)              | 7,362,772 | 8,346,579 | 10,687,071 | 7,035,826 |
| 1005 stearoyl sphingomyelin      | 1,292,053 | 1,407,098 | 1,641,171  | 1,275,791 |
| 834 stearoylcarnitine            | 79,051    | 869,075   | 364,794    | 1,557,840 |
| 591 succinylcarnitine            | 332,049   | 320,544   | 413,784    | 373,895   |
| 1662 terephthalic acid           | 222,330   | 245,689   | 286,506    | 196,772   |
| 1614 theobromine                 | 250,330   | 232,698   | 297,421    | 237,998   |
| 1615 theophylline                | 108,799   | 214,130   | 95,077     | 96,974    |
| 549 threitol                     | 1,268,397 | 1,470,554 | 2,292,753  | 1,636,328 |
| 1199 threonate                   | 581,345   | 551,125   | 784,763    | 646,381   |
| 17 threonine                     | 163,837   | 209,384   | 184,000    | 169,344   |
| 252 trans-4-hydroxyproline       | 40,261    | 46,285    | 37,145     | 44,134    |



| DARM-00007       | DARM-00008        | DARM-00009        | DARM-00010        |
|------------------|-------------------|-------------------|-------------------|
| NHSCi 2003 T1 D7 | NHSCi 2003 T1 D14 | NHSCi 2003 T1 D21 | NHSCi 2003 T1 D28 |
| 997730           | 997747            | 997713            | 997751            |
| 991352           | 991353            | 991354            | 991355            |
| NHSCi 2003 T1 D7 | NHSCi 2003 T1 D14 | NHSCi 2003 T1 D21 | NHSCi 2003 T1 D28 |
| T1 D7            | T1 D14            | T1 D21            | T1 D28            |
| 164.122          | 167.3             | 157.075           | 174.895           |
| T1 D7            | T1 D14            | T1 D21            | T1 D28            |

**PATHWAY SORT**

**ORDER            BIOCHEMICAL NAME**

|                                                      |            |            |            |            |
|------------------------------------------------------|------------|------------|------------|------------|
| 501 trehalose                                        | 264,414    | 733,871    | 1,123,262  | 1,108,517  |
| 1242 trigonelline (N <sup>1</sup> -methylnicotinate) | 256,829    | 250,492    | 299,135    | 223,820    |
| 145 tryptophan                                       | 4,409,522  | 4,518,646  | 4,357,563  | 4,664,176  |
| 151 tryptophan betaine                               | 1,491,360  | 1,372,023  | 1,696,189  | 1,418,543  |
| 99 tyrosine                                          | 2,320,444  | 2,352,258  | 2,152,174  | 2,627,710  |
| 1149 urate                                           | 181,639    | 126,371    | 171,076    | 130,226    |
| 245 urea                                             | 31,577,746 | 31,722,304 | 40,273,300 | 32,665,470 |
| 1180 uridine                                         | 31,039     | 32,081     | 31,602     | 35,827     |
| 190 valine                                           | 9,045,619  | 9,410,652  | 9,143,607  | 9,538,689  |
| 565 xylitol                                          | 91,194     | 102,298    | 48,166     | 22,405     |
| 570 xylonate                                         | 61,581     | 91,428     | 145,463    | 106,285    |
| 569 xylose                                           | 92,996     | 241,030    | 498,976    | 395,727    |

| DARM-00011      | DARM-00012      | DARM-00013       | DARM-00014       |
|-----------------|-----------------|------------------|------------------|
| NHSCi 2003 C D0 | NHSCi 2003 C D7 | NHSCi 2003 C D14 | NHSCi 2003 C D21 |
| 997716          | 997752          | 997719           | 997724           |
| 991356          | 991357          | 991358           | 991359           |
| NHSCi 2003 C D0 | NHSCi 2003 C D7 | NHSCi 2003 C D14 | NHSCi 2003 C D21 |
| C D0            | C D7            | C D14            | C D21            |
| 193.847         | 179.605         | 175.15           | 167.535          |

**PATHWAY SORT**

**ORDER BIOCHEMICAL NAME**

| ORDER | BIOCHEMICAL NAME                                   | C D0      | C D7      | C D14      | C D21      |
|-------|----------------------------------------------------|-----------|-----------|------------|------------|
| 905   | 1,2-propanediol                                    | 745,465   | 5,542,436 | 11,739,036 | 11,456,830 |
| 532   | 1,3-dihydroxyacetone                               | 91,317    | 83,511    | 86,058     | 71,210     |
| 515   | 1,5-anhydroglucitol (1,5-AG)                       | 7,733,593 | 9,084,731 | 11,977,017 | 7,683,883  |
| 523   | 1,6-anhydroglucose                                 | 539,458   | 309,368   | 490,427    | 309,208    |
| 636   | 10-heptadecenoate (17:1n7)                         | 47,620    | 56,219    | 63,134     | 101,628    |
| 742   | 13-methylmyristic acid                             | 70,477    | 113,970   | 135,348    | 190,039    |
| 744   | 15-methylpalmitate (isobar with 2-methylpalmitate) | 123,330   | 180,985   | 260,928    | 318,573    |
| 919   | 1-arachidonoylglycerophosphoethanolamine*          | 58,155    | 26,798    | 32,254     | 24,288     |
| 938   | 1-linoleoylglycerophosphocholine                   | 418,360   | 241,666   | 330,506    | 270,487    |
| 926   | 1-myristoylglycerophosphocholine                   |           | 47,843    | 56,395     | 68,330     |
| 936   | 1-oleoylglycerophosphocholine                      | 35,233    | 115,736   | 365,962    | 467,280    |
| 915   | 1-oleoylglycerophosphoethanolamine                 | 28,746    | 24,256    | 25,848     | 23,897     |
| 970   | 1-palmitoylglycerol (1-monopalmitin)               | 37,837    | 72,295    | 25,089     | 33,892     |
| 929   | 1-palmitoylglycerophosphocholine                   | 264,700   | 731,470   | 2,458,075  | 3,139,559  |
| 909   | 1-palmitoylglycerophosphoethanolamine              | 51,268    | 25,055    | 29,190     | 23,716     |
| 934   | 1-stearoylglycerophosphocholine                    | 126,564   | 382,165   | 866,049    | 1,215,477  |
| 533   | 2,3-diphosphoglycerate                             | 343,615   | 179,751   | 53,276     | 15,958     |
| 263   | 2-aminobutyrate                                    | 1,550,880 | 1,483,557 | 1,833,759  | 1,388,255  |
| 945   | 2-arachidonoylglycerophosphocholine*               |           | 63,550    | 59,448     | 90,251     |
| 920   | 2-arachidonoylglycerophosphoethanolamine*          | 86,205    | 562,167   | 373,379    | 685,989    |
| 923   | 2-docosahexaenoylglycerophosphoethanolamine*       |           | 80,033    | 110,317    | 178,156    |
| 922   | 2-docosapentaenoylglycerophosphoethanolamine*      |           | 68,694    | 110,196    | 184,748    |
| 1360  | 2-ethylhexanoate (isobar with 2-propylpentanoate)  | 59,909    | 44,382    | 38,362     | 50,924     |
| 229   | 2-hydroxybutyrate (AHB)                            | 1,394,679 | 1,303,673 | 1,566,481  | 1,387,970  |
| 714   | 2-hydroxyglutarate                                 | 57,644    | 92,289    | 111,144    | 106,544    |
| 706   | 2-hydroxypalmitate                                 | 67,999    | 43,894    | 86,230     | 49,435     |
| 939   | 2-linoleoylglycerophosphocholine*                  |           |           |            | 267,360    |

| DARM-00011      | DARM-00012      | DARM-00013       | DARM-00014       |
|-----------------|-----------------|------------------|------------------|
| NHSCi 2003 C D0 | NHSCi 2003 C D7 | NHSCi 2003 C D14 | NHSCi 2003 C D21 |
| 997716          | 997752          | 997719           | 997724           |
| 991356          | 991357          | 991358           | 991359           |
| NHSCi 2003 C D0 | NHSCi 2003 C D7 | NHSCi 2003 C D14 | NHSCi 2003 C D21 |
| C D0            | C D7            | C D14            | C D21            |
| 193.847         | 179.605         | 175.15           | 167.535          |

**PATHWAY SORT**

| ORDER | BIOCHEMICAL NAME                   | C D0       | C D7       | C D14      | C D21      |
|-------|------------------------------------|------------|------------|------------|------------|
| 202   | 2-methylbutyrylcarnitine           | 65,535     | 58,670     | 64,952     | 48,802     |
| 937   | 2-oleoylglycerophosphocholine*     |            | 50,257     | 103,141    | 120,696    |
| 930   | 2-palmitoylglycerophosphocholine*  | 33,346     | 107,667    | 165,617    | 261,996    |
| 935   | 2-stearoylglycerophosphocholine*   |            | 36,493     | 85,896     | 108,863    |
| 821   | 3-dehydrocarnitine*                | 906,418    | 961,604    | 1,059,317  | 1,106,133  |
| 170   | 3-indoxyl sulfate                  | 8,937      | 10,009     | 10,315     | 9,144      |
| 172   | 3-methyl-2-oxobutyrate             | 45,886     | 35,004     | 49,798     | 65,092     |
| 173   | 3-methyl-2-oxovalerate             | 44,605     | 59,005     | 72,995     | 73,524     |
| 529   | 3-phosphoglycerate                 | 2,267,315  | 1,175,531  | 1,150,217  | 730,233    |
| 193   | 4-methyl-2-oxopentanoate           | 85,775     | 111,910    | 133,265    | 143,553    |
| 266   | 5-methylthioadenosine (MTA)        | 34,671     | 98,330     | 101,348    | 104,721    |
| 282   | 5-oxoproline                       | 49,723     | 157,770    | 267,387    | 359,615    |
| 545   | 6-phosphogluconate                 | 233,923    | 136,218    | 102,403    | 82,150     |
| 1024  | 7-beta-hydroxycholesterol          | 23,520     | 18,829     | 35,962     |            |
| 712.5 | 9,10-epoxyoctadec-12(Z)-enoic acid | 9,135      | 117,159    | 162,516    | 211,099    |
| 672   | 9,10-epoxystearate                 | 152,282    | 6,645,405  | 11,809,674 | 11,676,105 |
| 822   | acetylcarnitine                    | 3,567,269  | 3,127,408  | 3,163,545  | 3,080,800  |
| 601   | acetylphosphate                    | 3,521,678  | 3,464,525  | 3,399,281  | 2,765,531  |
| 1105  | adenine                            | 47,024,196 | 38,403,428 | 36,290,012 | 34,509,272 |
| 1106  | adenosine                          | 28,575     | 11,067     | 43,115     | 22,989     |
| 1116  | adenosine 5'-diphosphate (ADP)     | 220,561    | 182,418    | 245,581    | 225,829    |
| 1232  | adenosine 5'diphosphoribose        | 115,107    | 123,778    | 126,905    | 120,626    |
| 1114  | adenosine 5'-monophosphate (AMP)   | 3,096,745  | 2,175,974  | 5,159,040  | 5,843,866  |
| 665   | adrenate (22:4n6)                  | 263,500    | 71,867     | 80,618     | 49,774     |

| DARM-00011      | DARM-00012      | DARM-00013       | DARM-00014       |
|-----------------|-----------------|------------------|------------------|
| NHSCi 2003 C D0 | NHSCi 2003 C D7 | NHSCi 2003 C D14 | NHSCi 2003 C D21 |
| 997716          | 997752          | 997719           | 997724           |
| 991356          | 991357          | 991358           | 991359           |
| NHSCi 2003 C D0 | NHSCi 2003 C D7 | NHSCi 2003 C D14 | NHSCi 2003 C D21 |
| C D0            | C D7            | C D14            | C D21            |
| 193.847         | 179.605         | 175.15           | 167.535          |

**PATHWAY SORT**

| ORDER | BIOCHEMICAL NAME         | C D0       | C D7       | C D14      | C D21      |
|-------|--------------------------|------------|------------|------------|------------|
| 27    | alanine                  | 49,976,828 | 53,066,216 | 66,933,316 | 57,356,184 |
| 1150  | allantoin                | 17,028     | 23,332     | 14,181     | 57,372     |
| 179   | alpha-hydroxyisocaproate | 84,320     |            | 161,549    | 249,219    |
| 198   | alpha-hydroxyisovalerate | 384,817    | 378,194    | 541,972    | 614,961    |
| 1266  | alpha-tocopherol         | 350,343    | 286,868    | 314,688    | 216,179    |
| 1034  | androsterone sulfate     | 5,255      | 4,742      | 5,528      | 3,904      |
| 566   | arabinose                | 413,890    | 309,074    | 507,504    | 315,544    |
| 546   | arabitol                 | 642,209    | 511,500    | 766,245    | 570,469    |
| 1202  | arabonate                | 119,653    | 105,824    | 146,365    | 111,321    |
| 659   | arachidonate (20:4n6)    | 516,035    | 546,934    | 640,309    | 1,048,029  |
| 241   | arginine                 | 617,204    | 676,944    | 698,446    | 1,699,196  |
| 25    | asparagine               | 1,352,633  | 1,164,342  | 1,243,612  | 963,227    |
| 24    | aspartate                | 6,387,902  | 6,871,906  | 7,341,442  | 6,570,116  |
| 721   | azelate (nonanedioate)   | 6,262      | 21,906     | 50,306     | 53,504     |
| 26    | beta-alanine             | 121,915    | 104,975    | 118,882    | 47,145     |
| 7     | beta-hydroxypyruvate     | 331,478    | 293,631    | 292,325    | 314,497    |
| 22    | betaine                  | 1,161,682  | 1,207,833  | 1,186,017  | 1,278,111  |
| 1057  | beta-sitosterol          |            | 32,645     | 52,307     | 32,088     |
| 1216  | biliverdin               |            | 23,055     |            | 20,790     |

| DARM-00011      | DARM-00012      | DARM-00013       | DARM-00014       |
|-----------------|-----------------|------------------|------------------|
| NHSCi 2003 C D0 | NHSCi 2003 C D7 | NHSCi 2003 C D14 | NHSCi 2003 C D21 |
| 997716          | 997752          | 997719           | 997724           |
| 991356          | 991357          | 991358           | 991359           |
| NHSCi 2003 C D0 | NHSCi 2003 C D7 | NHSCi 2003 C D14 | NHSCi 2003 C D21 |
| C D0            | C D7            | C D14            | C D21            |
| 193.847         | 179.605         | 175.15           | 167.535          |

**PATHWAY SORT**

**ORDER            BIOCHEMICAL NAME**

| C D0 | C D7        | C D14       | C D21       |
|------|-------------|-------------|-------------|
|      | 17,822      |             | 13,327      |
|      | 2,753,506   | 2,504,050   | 2,881,762   |
|      |             | 171,898     |             |
|      | 15,020      | 29,587      | 37,076      |
|      | 111,794     | 69,044      | 57,352      |
|      | 39,167      | 29,957      | 35,741      |
|      | 663,728     | 766,394     | 777,366     |
|      | 84,164      | 84,270      | 91,729      |
|      | 27,059      | 32,641      | 27,023      |
|      | 39,581,568  | 36,543,404  | 44,544,656  |
|      | 697,453     | 753,068     | 881,484     |
|      | 579,430     | 702,831     | 918,649     |
|      |             | 86,998      | 170,842     |
|      | 428,947,008 | 362,284,064 | 377,317,120 |
|      |             |             | 279,634,336 |
|      | 148,677     | 158,868     | 160,536     |
|      | 3,147,259   | 3,091,284   | 3,350,623   |
|      | 380,758     | 276,826     | 392,966     |
|      | 689,943     | 830,427     | 857,522     |
|      | 487,288     | 414,342     | 479,753     |
|      | 25,349      | 30,826      | 36,360      |
|      | 61,147      | 43,586      | 76,840      |
|      |             |             | 107,997     |
|      | 132,668     | 16,113      | 224,498     |
|      | 247,818     |             | 246,137     |
|      | 71,607      | 118,299     | 114,267     |
|      | 28,612      | 45,242      | 49,538      |
|      | 109,876     | 158,018     | 141,551     |
|      | 551,497     | 432,934     | 558,397     |
|      | 276,552     | 261,619     | 409,745     |
|      | 1,020,082   | 1,201,194   | 1,627,422   |
|      | 431,639     | 380,390     | 575,805     |
|      |             |             | 476,161     |

|                                    | DARM-00011      | DARM-00012      | DARM-00013       | DARM-00014       |
|------------------------------------|-----------------|-----------------|------------------|------------------|
|                                    | NHSCi 2003 C D0 | NHSCi 2003 C D7 | NHSCi 2003 C D14 | NHSCi 2003 C D21 |
|                                    | 997716          | 997752          | 997719           | 997724           |
|                                    | 991356          | 991357          | 991358           | 991359           |
|                                    | NHSCi 2003 C D0 | NHSCi 2003 C D7 | NHSCi 2003 C D14 | NHSCi 2003 C D21 |
| C D0                               | C D7            | C D14           | C D21            |                  |
|                                    | 193.847         | 179.605         | 175.15           | 167.535          |
| C D0                               | C D7            | C D14           | C D21            |                  |
| 876 ethanolamine                   | 444,644         | 606,292         | 933,204          | 469,203          |
| 472 fructose                       | 73,592,448      | 73,038,224      | 90,798,496       | 81,384,712       |
| 524 fructose-6-phosphate           | 506,707         | 494,636         | 793,079          | 687,997          |
| 594 fumarate                       | 337,383         | 272,994         | 404,529          | 462,639          |
| 404 gamma-glutamylleucine          | 23,370          | 28,570          | 25,586           | 27,710           |
| 521 glucose                        | 1,145,662,464   | 1,051,588,224   | 1,154,292,480    | 1,007,674,112    |
| 519 glucose-6-phosphate (G6P)      | 1,270,766       | 1,393,362       | 2,158,723        | 1,834,501        |
| 39 glutamate                       | 6,607,252       | 4,784,893       | 6,068,648        | 4,895,959        |
| 44 glutamine                       | 1,854,655       | 1,664,139       | 1,394,841        | 1,282,836        |
| 80 glutaroyl carnitine             |                 | 15,536          | 11,361           | 20,885           |
| 283 glutathione, oxidized (GSSG)   | 1,536,976       | 1,434,289       | 1,156,997        | 1,022,837        |
| 280 glutathione, reduced (GSH)     | 22,156,660      | 26,058,072      | 23,415,274       | 22,568,236       |
| 517 glycerate                      | 283,370         | 482,091         | 856,981          | 642,495          |
| 882 glycerol 3-phosphate (G3P)     | 384,380         | 295,793         | 381,099          | 290,030          |
| 883 glycerophosphorylcholine (GPC) | 168,187         | 167,300         | 148,713          | 145,989          |
| 1 glycine                          | 30,459,652      | 34,107,052      | 46,871,188       | 52,295,720       |
| 851 glycochenodeoxycholate         | 21,412          | 14,671          | 17,295           | 19,348           |
| 840 glycocholate                   | 5,351           |                 | 7,725            | 4,318            |
| 849 glycodeoxycholate              | 8,586           |                 |                  |                  |
| 1318 glycolate (hydroxyacetate)    | 462,094         | 495,049         | 539,603          | 434,382          |
| 1128 guanosine                     | 33,726          | 35,356          | 38,938           | 37,136           |
| 1212 heme*                         | 615,413         | 1,819,243       | 1,145,810        | 1,617,094        |
| 619 heptanoate (7:0)               | 15,218          | 20,165          | 20,617           | 16,034           |
| 823 hexanoylcarnitine              | 73,941          | 37,478          | 35,725           | 45,020           |
| 1288 hippurate                     | 52,619          | 63,026          | 57,530           | 65,282           |
| 50 histidine                       | 40,988          | 39,117          | 36,693           | 40,185           |

**PATHWAY SORT**

**ORDER BIOCHEMICAL NAME**

| PATHWAY SORT<br>ORDER | BIOCHEMICAL NAME                                                        | DARM-00011      | DARM-00012      | DARM-00013       | DARM-00014       |
|-----------------------|-------------------------------------------------------------------------|-----------------|-----------------|------------------|------------------|
|                       |                                                                         | NHSCi 2003 C D0 | NHSCi 2003 C D7 | NHSCi 2003 C D14 | NHSCi 2003 C D21 |
|                       |                                                                         | 997716          | 997752          | 997719           | 997724           |
|                       |                                                                         | 991356          | 991357          | 991358           | 991359           |
|                       |                                                                         | NHSCi 2003 C D0 | NHSCi 2003 C D7 | NHSCi 2003 C D14 | NHSCi 2003 C D21 |
|                       |                                                                         | C D0            | C D7            | C D14            | C D21            |
|                       |                                                                         | 193.847         | 179.605         | 175.15           | 167.535          |
|                       |                                                                         | C D0            | C D7            | C D14            | C D21            |
|                       | 231 homocysteine                                                        | 38,651          | 63,085          | 55,863           | 86,413           |
|                       | 1585 homostachydrine*                                                   | 45,480          | 41,047          | 42,057           | 38,489           |
|                       | 206 hydroxyisovaleroyl carnitine                                        | 174,483         | 190,571         | 217,050          | 206,799          |
|                       | 1098 hypoxanthine                                                       | 357,857         | 443,716         | 1,540,916        | 2,909,897        |
|                       | 1101 inosine 5'-monophosphate (IMP)                                     | 122,450         | 208,400         | 343,818          | 191,524          |
|                       | Isobar: fructose 1,6-diphosphate, glucose 1,6-diphosphate, myo-inositol |                 |                 |                  |                  |
|                       | 527 1,4 or 1,3-diphosphate                                              | 59,763          | 58,065          | 66,455           | 63,162           |
|                       | 561 Isobar: ribulose 5-phosphate, xylulose 5-phosphate                  | 189,553         | 84,681          | 151,269          | 100,797          |
|                       | 496 Isobar: sorbitol, mannitol                                          | 17,664,290      | 18,459,064      | 18,831,410       | 18,104,376       |
|                       | 200 isobutyrylcarnitine                                                 | 162,344         | 134,814         | 118,448          | 137,637          |
|                       | 180 isoleucine                                                          | 3,655,383       | 4,322,716       | 4,500,956        | 4,277,236        |
|                       | 478 isomaltose                                                          | 1,830,657       | 1,377,313       | 2,987,101        | 2,023,536        |
|                       | 205 isovalerylcarnitine                                                 | 97,051          | 93,569          | 112,835          | 94,010           |
|                       | 144 kynurenine                                                          | 130,991         | 117,032         | 121,182          | 113,468          |
|                       | 536 lactate                                                             | 219,773,488     | 668,204,544     | 1,320,499,968    | 1,502,399,360    |
|                       | 1018 lathosterol                                                        | 115,097         | 81,692          | 91,381           | 66,549           |
|                       | 625 laurate (12:0)                                                      | 101,642         | 115,661         | 87,744           | 130,280          |
|                       | 181 leucine                                                             | 6,983,435       | 7,804,498       | 8,769,108        | 8,426,035        |

| DARM-00011      | DARM-00012      | DARM-00013       | DARM-00014       |
|-----------------|-----------------|------------------|------------------|
| NHSCi 2003 C D0 | NHSCi 2003 C D7 | NHSCi 2003 C D14 | NHSCi 2003 C D21 |
| 997716          | 997752          | 997719           | 997724           |
| 991356          | 991357          | 991358           | 991359           |
| NHSCi 2003 C D0 | NHSCi 2003 C D7 | NHSCi 2003 C D14 | NHSCi 2003 C D21 |
| C D0            | C D7            | C D14            | C D21            |
| 193.847         | 179.605         | 175.15           | 167.535          |

**PATHWAY SORT**

| ORDER  | BIOCHEMICAL NAME                               | C D0       | C D7       | C D14      | C D21      |
|--------|------------------------------------------------|------------|------------|------------|------------|
|        | 604 linoleate (18:2n6)                         | 1,365,113  | 1,457,105  | 2,026,197  | 2,989,312  |
|        | 608 linolenate [alpha or gamma; (18:3n3 or 6)] | 246,779    | 436,841    | 398,413    | 526,144    |
|        | 69 lysine                                      | 2,180,764  | 2,605,770  | 4,363,680  | 1,926,589  |
|        | 598 malate                                     | 974,764    | 1,099,388  | 1,767,475  | 1,549,931  |
|        | 482 maltose                                    | 1,659,091  | 1,100,590  | 1,351,060  | 1,142,318  |
|        | 487 mannose                                    | 17,039,670 | 15,669,026 | 16,297,070 | 13,653,562 |
|        | 489 mannose-6-phosphate                        | 239,608    | 267,211    | 398,044    | 351,789    |
|        | 635 margarate (17:0)                           | 262,592    | 310,883    | 453,330    | 447,568    |
|        | 658 mead acid (20:3n9)                         | 20,893     | 5,950      | 18,337     | 16,707     |
|        | 225 methionine                                 | 748,963    | 705,926    | 508,402    | 503,209    |
|        | 890 myo-inositol                               | 2,280,102  | 2,075,890  | 2,385,278  | 1,672,674  |
|        | 629 myristate (14:0)                           | 401,070    | 723,104    | 820,138    | 976,880    |
|        | 630 myristoleate (14:1n5)                      | 14,424     |            |            | 45,316     |
| 1242.1 | N1-Methyl-2-pyridone-5-carboxamide             | 292,361    | 299,107    | 196,349    | 249,327    |
| 75     | N-6-trimethyllysine                            | 105,525    | 147,909    | 124,055    | 109,690    |
| 4      | N-acetylglycine                                | 147,937    | 139,741    | 117,156    | 73,590     |
| 227    | N-acetylmethionine                             | 4,876      |            | 4,207      | 5,168      |
| 455    | N-acetylneuraminat                             | 29,955     | 60,023     | 117,358    | 87,067     |
| 1221   | nicotinamide                                   | 2,483,235  | 2,287,273  | 3,061,721  | 3,744,597  |
| 1224   | nicotinamide adenine dinucleotide (NAD+)       | 2,866      | 3,965      | 3,071      | 3,529      |
| 825    | octanoylcarnitine                              | 45,746     | 59,572     | 60,687     | 75,646     |
| 639    | oleate (18:1n9)                                | 988,918    | 704,987    | 851,576    | 686,319    |
| 835    | oleoylcarnitine                                | 72,832     | 193,833    | 241,106    | 338,804    |



|                               | DARM-00011      | DARM-00012      | DARM-00013       | DARM-00014       |
|-------------------------------|-----------------|-----------------|------------------|------------------|
|                               | NHSCi 2003 C D0 | NHSCi 2003 C D7 | NHSCi 2003 C D14 | NHSCi 2003 C D21 |
|                               | 997716          | 997752          | 997719           | 997724           |
|                               | 991356          | 991357          | 991358           | 991359           |
|                               | NHSCi 2003 C D0 | NHSCi 2003 C D7 | NHSCi 2003 C D14 | NHSCi 2003 C D21 |
| C D0                          | C D7            | C D14           | C D21            |                  |
|                               | 193.847         | 179.605         | 175.15           | 167.535          |
| C D0                          | C D7            | C D14           | C D21            |                  |
|                               | 86,150          | 22,320          |                  |                  |
| 244 ornithine                 | 13,754,966      | 13,368,233      | 15,370,339       | 10,388,709       |
| 632 palmitate (16:0)          | 5,660,507       | 6,226,841       | 8,189,210        | 8,121,497        |
| 633 palmitoleate (16:1n7)     | 236,778         | 415,979         | 355,046          | 539,108          |
| 1004 palmitoyl sphingomyelin  | 16,914,186      | 14,422,895      | 19,492,446       | 14,503,270       |
| 833 palmitoylcarnitine        |                 | 129,497         | 189,146          | 274,127          |
| 1243 pantothenate             | 108,096         | 83,864          | 119,207          | 106,866          |
| 1613 paraxanthine             | 436,920         | 611,989         | 548,293          | 495,671          |
| 88 p-cresol sulfate           | 81,349          | 74,739          | 86,044           | 79,590           |
| 621 pelargonate (9:0)         | 226,548         | 347,348         | 377,646          | 289,970          |
| 631 pentadecanoate (15:0)     | 152,004         | 226,215         | 220,682          | 263,728          |
| 135 phenol sulfate            | 20,851          | 19,109          | 23,186           | 25,279           |
| 128 phenylacetylglutamine     | 77,384          | 77,265          | 87,105           | 85,953           |
| 83 phenylalanine              | 7,762,848       | 9,454,861       | 9,785,504        | 10,072,558       |
| 602 phosphate                 | 1,153,601,152   | 1,140,459,264   | 1,533,833,216    | 1,283,482,240    |
| 534 phosphoenolpyruvate (PEP) | 377,326         | 230,271         | 80,526           | 62,062           |
| 877 phosphoethanolamine       |                 | 67,997          | 130,290          |                  |
| 74 pipecolate                 | 114,108         | 123,954         | 109,387          | 110,645          |
| 1531 piperine                 | 131,170         | 70,842          | 72,463           | 83,012           |
| 246 proline                   | 1,958,820       | 1,803,254       | 2,195,216        | 2,064,586        |
| 809 propionylcarnitine        | 757,385         | 636,318         | 705,852          | 663,757          |
| 1181 pseudouridine            | 10,591          | 8,542           | 11,482           | 16,321           |
| 45 pyroglutamine*             | 82,600          | 49,694          | 74,796           | 56,790           |
| 603 pyrophosphate (PPi)       | 192,657         | 169,938         | 51,439           | 16,184           |

**PATHWAY SORT**

**ORDER BIOCHEMICAL NAME**

285 ophthalmate

244 ornithine

632 palmitate (16:0)

633 palmitoleate (16:1n7)

1004 palmitoyl sphingomyelin

833 palmitoylcarnitine

1243 pantothenate

1613 paraxanthine

88 p-cresol sulfate

621 pelargonate (9:0)

631 pentadecanoate (15:0)

135 phenol sulfate

128 phenylacetylglutamine

83 phenylalanine

602 phosphate

534 phosphoenolpyruvate (PEP)

877 phosphoethanolamine

74 pipecolate

1531 piperine

246 proline

809 propionylcarnitine

1181 pseudouridine

45 pyroglutamine\*

603 pyrophosphate (PPi)

| DARM-00011      | DARM-00012      | DARM-00013       | DARM-00014       |
|-----------------|-----------------|------------------|------------------|
| NHSCi 2003 C D0 | NHSCi 2003 C D7 | NHSCi 2003 C D14 | NHSCi 2003 C D21 |
| 997716          | 997752          | 997719           | 997724           |
| 991356          | 991357          | 991358           | 991359           |
| NHSCi 2003 C D0 | NHSCi 2003 C D7 | NHSCi 2003 C D14 | NHSCi 2003 C D21 |
| C D0            | C D7            | C D14            | C D21            |
| 193.847         | 179.605         | 175.15           | 167.535          |

**PATHWAY SORT**

| ORDER | BIOCHEMICAL NAME             | C D0      | C D7      | C D14     | C D21     |
|-------|------------------------------|-----------|-----------|-----------|-----------|
| 535   | pyruvate                     | 2,754,908 | 2,835,749 | 3,752,118 | 1,589,179 |
| 1469  | ranitidine                   | 377,435   | 305,239   | 414,925   | 385,438   |
| 548   | ribitol                      | 238,729   | 163,572   | 277,166   | 207,410   |
| 557   | ribose 5-phosphate           | 231,690   | 175,353   | 169,389   | 108,367   |
| 559   | ribulose                     |           | 23,478    | 13,883    | 18,999    |
| 224   | S-adenosylhomocysteine (SAH) | 121,506   | 191,402   | 226,296   | 252,239   |
| 551   | sedoheptulose-7-phosphate    | 18,716    | 141,133   | 35,476    | 66,973    |
| 8     | serine                       | 6,690,800 | 6,545,978 | 7,781,857 | 6,767,347 |
| 216   | S-methylcysteine             | 215,932   | 268,168   | 275,732   | 219,059   |
| 281   | S-methylglutathione          | 31,160    | 30,894    | 30,219    | 28,836    |
| 270   | spermidine                   | 893,702   | 1,022,620 | 1,170,312 | 1,280,653 |
| 1584  | stachydrine                  | 197,827   | 178,193   | 184,074   | 248,399   |
| 637   | stearate (18:0)              | 5,334,110 | 6,137,328 | 8,682,885 | 8,213,118 |
| 1005  | stearoyl sphingomyelin       | 1,509,931 | 1,352,906 | 1,595,698 | 1,321,143 |
| 834   | stearoylcarnitine            | 39,964    | 70,787    | 114,185   | 140,880   |
| 591   | succinylcarnitine            | 339,675   | 297,560   | 364,784   | 399,232   |
| 1662  | terephthalic acid            | 291,667   | 259,547   | 236,052   | 232,314   |
| 1614  | theobromine                  | 330,840   | 250,101   | 299,885   | 304,534   |
| 1615  | theophylline                 | 72,301    | 99,675    | 182,464   | 135,783   |
| 549   | threitol                     | 1,118,487 | 1,241,592 | 1,603,978 | 1,310,499 |
| 1199  | threonate                    | 613,251   | 486,071   | 626,715   | 513,435   |
| 17    | threonine                    | 175,088   | 150,748   | 161,778   | 183,176   |
| 252   | trans-4-hydroxyproline       | 39,439    | 44,770    | 40,694    | 39,766    |

| DARM-00011      | DARM-00012      | DARM-00013       | DARM-00014       |         |
|-----------------|-----------------|------------------|------------------|---------|
| NHSCi 2003 C D0 | NHSCi 2003 C D7 | NHSCi 2003 C D14 | NHSCi 2003 C D21 |         |
|                 | 997716          | 997752           | 997719           | 997724  |
|                 | 991356          | 991357           | 991358           | 991359  |
| NHSCi 2003 C D0 | NHSCi 2003 C D7 | NHSCi 2003 C D14 | NHSCi 2003 C D21 |         |
| C D0            | C D7            | C D14            | C D21            |         |
|                 | 193.847         | 179.605          | 175.15           | 167.535 |
| C D0            | C D7            | C D14            | C D21            |         |

**PATHWAY SORT**

**ORDER            BIOCHEMICAL NAME**

|                                                      |            |            |            |            |
|------------------------------------------------------|------------|------------|------------|------------|
| 501 trehalose                                        | 97,806     | 518,969    | 1,111,288  | 837,693    |
| 1242 trigonelline (N <sup>1</sup> -methylnicotinate) | 264,197    | 236,175    | 265,502    | 278,679    |
| 145 tryptophan                                       | 3,631,722  | 4,102,700  | 4,409,757  | 4,285,182  |
| 151 tryptophan betaine                               | 1,431,999  | 1,407,965  | 1,578,823  | 1,595,563  |
| 99 tyrosine                                          | 1,799,546  | 2,228,006  | 2,271,666  | 2,324,717  |
| 1149 urate                                           | 181,254    | 155,272    | 189,889    | 168,887    |
| 245 urea                                             | 33,063,718 | 31,198,160 | 34,479,028 | 30,550,978 |
| 1180 uridine                                         | 17,807     | 22,788     | 21,241     | 24,467     |
| 190 valine                                           | 7,813,211  | 8,622,408  | 8,899,696  | 9,083,185  |
| 565 xylitol                                          |            |            |            |            |
| 570 xylonate                                         | 37,575     | 49,461     | 102,285    | 98,514     |
| 569 xylose                                           | 75,703     | 60,204     | 107,993    | 93,872     |

| PATHWAY SORT<br>ORDER | BIOCHEMICAL NAME                                   | DARM-00015       | DARM-00016       | DARM-00017       | DARM-00018        |
|-----------------------|----------------------------------------------------|------------------|------------------|------------------|-------------------|
|                       |                                                    | NHSCi 2003 C D28 | NHSCI 1866 T2    | NHSCI 1866 T2 D7 | NHSCI 1866 T2 D14 |
|                       |                                                    | 997729           | 997715           | 997736           | 997748            |
|                       |                                                    | 991360           | 991361           | 991362           | 991363            |
|                       |                                                    | NHSCi 2003 C D28 | NHSCI 1866 T2 D0 | NHSCI 1866 T2 D7 | NHSCI 1866 T2 D14 |
|                       |                                                    | C D28            | T2 D0            | T2 D7            | T2 D14            |
|                       |                                                    | 175.121          | 176.276          | 164.34           | 172.339           |
|                       |                                                    | C D28            | T2 D0            | T2 D7            | T2 D14            |
| 905                   | 1,2-propanediol                                    | 14,866,116       | 4,732,242        | 8,877,082        | 11,024,061        |
| 532                   | 1,3-dihydroxyacetone                               | 71,487           | 72,315           | 88,302           | 97,843            |
| 515                   | 1,5-anhydroglucitol (1,5-AG)                       | 9,799,194        | 6,314,912        | 8,753,204        | 7,350,232         |
| 523                   | 1,6-anhydroglucose                                 | 378,368          | 331,929          | 288,474          | 281,344           |
| 636                   | 10-heptadecenoate (17:1n7)                         | 99,983           | 52,221           | 74,115           | 78,955            |
| 742                   | 13-methylmyristic acid                             | 174,351          | 57,251           | 95,666           | 116,603           |
| 744                   | 15-methylpalmitate (isobar with 2-methylpalmitate) | 338,906          | 139,630          | 214,022          | 265,868           |
| 919                   | 1-arachidonoylglycerophosphoethanolamine*          | 20,429           | 64,481           | 26,055           | 25,200            |
| 938                   | 1-linoleoylglycerophosphocholine                   | 239,615          | 470,973          | 236,606          | 229,663           |
| 926                   | 1-myristoylglycerophosphocholine                   | 108,714          |                  | 66,246           | 74,117            |
| 936                   | 1-oleoylglycerophosphocholine                      | 878,497          | 187,460          | 562,279          | 471,502           |
| 915                   | 1-oleoylglycerophosphoethanolamine                 | 16,921           | 50,751           | 34,814           | 11,474            |
| 970                   | 1-palmitoylglycerol (1-monopalmitin)               | 30,950           | 38,448           | 15,764           | 31,982            |
| 929                   | 1-palmitoylglycerophosphocholine                   | 5,900,696        | 1,036,902        | 2,900,194        | 2,563,844         |
| 909                   | 1-palmitoylglycerophosphoethanolamine              | 24,537           | 43,399           | 16,194           | 13,889            |
| 934                   | 1-stearoylglycerophosphocholine                    | 1,988,020        | 371,740          | 1,164,406        | 1,296,232         |
| 533                   | 2,3-diphosphoglycerate                             | 17,146           | 347,674          | 100,045          | 17,657            |
| 263                   | 2-aminobutyrate                                    | 1,589,408        | 2,218,991        | 2,722,774        | 2,667,683         |
| 945                   | 2-arachidonoylglycerophosphocholine*               | 192,300          | 35,575           | 168,711          | 202,691           |
| 920                   | 2-arachidonoylglycerophosphoethanolamine*          | 1,437,579        | 323,714          | 1,573,934        | 1,967,320         |
| 923                   | 2-docosahexaenoylglycerophosphoethanolamine*       | 340,603          | 111,767          | 269,754          | 426,141           |
| 922                   | 2-docosapentaenoylglycerophosphoethanolamine*      | 395,785          | 89,351           | 335,291          | 391,305           |
| 1360                  | 2-ethylhexanoate (isobar with 2-propylpentanoate)  | 32,439           | 44,590           | 38,235           | 32,175            |
| 229                   | 2-hydroxybutyrate (AHB)                            | 1,364,453        | 1,460,712        | 1,701,494        | 1,801,408         |
| 714                   | 2-hydroxyglutarate                                 | 115,945          | 107,074          | 126,439          | 174,700           |
| 706                   | 2-hydroxypalmitate                                 | 47,298           | 74,240           | 39,214           | 43,962            |
| 939                   | 2-linoleoylglycerophosphocholine*                  | 419,326          |                  | 351,103          | 307,996           |

| DARM-00015       | DARM-00016       | DARM-00017       | DARM-00018        |
|------------------|------------------|------------------|-------------------|
| NHSCi 2003 C D28 | NHSCI 1866 T2    | NHSCI 1866 T2 D7 | NHSCI 1866 T2 D14 |
| 997729           | 997715           | 997736           | 997748            |
| 991360           | 991361           | 991362           | 991363            |
| NHSCi 2003 C D28 | NHSCI 1866 T2 D0 | NHSCI 1866 T2 D7 | NHSCI 1866 T2 D14 |
| C D28            | T2 D0            | T2 D7            | T2 D14            |
| 175.121          | 176.276          | 164.34           | 172.339           |

**PATHWAY SORT**

| ORDER | BIOCHEMICAL NAME                   | C D28      | T2 D0      | T2 D7      | T2 D14     |
|-------|------------------------------------|------------|------------|------------|------------|
| 202   | 2-methylbutyrylcarnitine           | 61,392     | 79,619     | 56,933     | 56,908     |
| 937   | 2-oleoylglycerophosphocholine*     | 184,264    | 93,762     | 195,387    | 179,311    |
| 930   | 2-palmitoylglycerophosphocholine*  | 410,775    | 110,801    | 303,985    | 360,238    |
| 935   | 2-stearoylglycerophosphocholine*   | 112,720    |            | 112,650    | 90,132     |
| 821   | 3-dehydrocarnitine*                | 1,138,316  | 1,034,712  | 1,034,847  | 1,061,604  |
| 170   | 3-indoxyl sulfate                  | 8,839      | 4,230      | 4,984      | 3,892      |
| 172   | 3-methyl-2-oxobutyrate             | 39,850     | 50,607     | 57,731     | 52,980     |
| 173   | 3-methyl-2-oxovalerate             | 63,333     | 46,637     | 56,752     | 56,915     |
| 529   | 3-phosphoglycerate                 | 694,597    | 1,172,991  | 1,040,874  | 476,708    |
| 193   | 4-methyl-2-oxopentanoate           | 107,035    | 106,251    | 132,158    | 136,134    |
| 266   | 5-methylthioadenosine (MTA)        | 107,301    | 40,681     | 101,342    | 123,505    |
| 282   | 5-oxoproline                       | 442,655    | 56,665     | 183,699    | 294,942    |
| 545   | 6-phosphogluconate                 | 44,588     | 47,121     | 84,215     | 40,442     |
| 1024  | 7-beta-hydroxycholesterol          | 15,910     | 45,740     | 12,939     | 29,835     |
| 712.5 | 9,10-epoxyoctadec-12(Z)-enoic acid | 247,076    | 6,772      | 104,834    | 140,798    |
| 672   | 9,10-epoxystearate                 | 13,436,268 | 231,764    | 5,225,775  | 6,967,034  |
| 822   | acetylcarnitine                    | 3,041,098  | 4,375,307  | 3,964,733  | 3,815,497  |
| 601   | acetylphosphate                    | 3,160,937  | 3,260,516  | 3,741,576  | 4,005,335  |
| 1105  | adenine                            | 33,779,032 | 41,717,592 | 29,851,106 | 19,291,972 |
| 1106  | adenosine                          | 23,027     | 18,010     | 16,994     | 15,771     |
| 1116  | adenosine 5'-diphosphate (ADP)     | 198,708    | 244,579    | 182,650    | 185,946    |
| 1232  | adenosine 5'diphosphoribose        | 117,490    | 95,636     | 105,344    | 99,959     |
| 1114  | adenosine 5'-monophosphate (AMP)   | 6,139,028  | 4,370,879  | 4,075,112  | 4,442,594  |
| 665   | adrenate (22:4n6)                  | 30,848     | 98,456     | 110,541    | 54,285     |

| PATHWAY SORT<br>ORDER | BIOCHEMICAL NAME             | DARM-00015       | DARM-00016       | DARM-00017       | DARM-00018        |
|-----------------------|------------------------------|------------------|------------------|------------------|-------------------|
|                       |                              | NHSCi 2003 C D28 | NHSCi 1866 T2    | NHSCi 1866 T2 D7 | NHSCi 1866 T2 D14 |
|                       |                              | 997729           | 997715           | 997736           | 997748            |
|                       |                              | 991360           | 991361           | 991362           | 991363            |
|                       |                              | NHSCi 2003 C D28 | NHSCi 1866 T2 D0 | NHSCi 1866 T2 D7 | NHSCi 1866 T2 D14 |
|                       |                              | C D28            | T2 D0            | T2 D7            | T2 D14            |
|                       |                              | 175.121          | 176.276          | 164.34           | 172.339           |
|                       |                              | C D28            | T2 D0            | T2 D7            | T2 D14            |
|                       | 27 alanine                   | 61,188,412       | 52,278,748       | 65,398,400       | 70,100,184        |
|                       | 1150 allantoin               | 40,558           | 51,408           | 13,998           | 16,388            |
|                       | 179 alpha-hydroxyisocaproate | 331,016          |                  |                  | 188,710           |
|                       | 198 alpha-hydroxyisovalerate | 793,435          | 309,467          | 289,582          | 363,053           |
|                       | 1266 alpha-tocopherol        | 230,446          | 168,019          | 165,014          | 149,210           |
|                       | 1034 androsterone sulfate    | 4,606            | 8,676            | 6,634            | 7,606             |
|                       | 566 arabinose                | 349,319          | 339,400          | 330,925          | 390,921           |
|                       | 546 arabitol                 | 680,380          | 573,597          | 548,209          | 500,688           |
|                       | 1202 arabonate               | 126,756          | 74,847           | 111,315          | 94,048            |
|                       | 659 arachidonate (20:4n6)    | 1,000,687        | 462,961          | 570,460          | 730,649           |
|                       | 241 arginine                 | 1,208,572        | 383,363          | 862,572          | 699,121           |
|                       | 25 asparagine                | 933,457          | 1,574,333        | 1,538,009        | 1,474,817         |
|                       | 24 aspartate                 | 7,139,496        | 2,427,314        | 2,836,212        | 3,263,091         |
|                       | 721 azelate (nonanedioate)   | 73,267           | 6,300            | 18,510           | 27,122            |
|                       | 26 beta-alanine              | 88,894           | 176,953          | 157,935          | 201,987           |
|                       | 7 beta-hydroxypyruvate       | 297,446          | 163,622          | 322,000          | 307,210           |
|                       | 22 betaine                   | 1,323,155        | 1,565,390        | 1,629,721        | 1,668,581         |
|                       | 1057 beta-sitosterol         |                  | 61,653           |                  |                   |
|                       | 1216 biliverdin              | 21,234           | 27,466           | 28,173           | 60,384            |

| DARM-00015       | DARM-00016       | DARM-00017       | DARM-00018        |
|------------------|------------------|------------------|-------------------|
| NHSCi 2003 C D28 | NHSCI 1866 T2    | NHSCI 1866 T2 D7 | NHSCI 1866 T2 D14 |
| 997729           | 997715           | 997736           | 997748            |
| 991360           | 991361           | 991362           | 991363            |
| NHSCi 2003 C D28 | NHSCI 1866 T2 D0 | NHSCI 1866 T2 D7 | NHSCI 1866 T2 D14 |
| C D28            | T2 D0            | T2 D7            | T2 D14            |
| 175.121          | 176.276          | 164.34           | 172.339           |

**PATHWAY SORT**

| ORDER | BIOCHEMICAL NAME                   | C D28       | T2 D0       | T2 D7       | T2 D14      |
|-------|------------------------------------|-------------|-------------|-------------|-------------|
| 811   | butyrylcarnitine                   | 16,837      |             | 15,149      | 35,750      |
| 1612  | caffeine                           | 2,399,502   | 3,775,415   | 3,358,247   | 3,312,058   |
| 1059  | campesterol                        | 284,834     | 225,673     | 229,713     | 301,398     |
| 622   | caprate (10:0)                     | 35,912      | 16,425      | 27,932      | 36,590      |
| 618   | caproate (6:0)                     | 56,028      | 70,295      | 72,782      | 40,854      |
| 620   | caprylate (8:0)                    | 32,087      | 22,626      | 39,802      | 41,971      |
| 820   | carnitine                          | 653,067     | 859,212     | 991,410     | 1,012,787   |
| 1300  | catechol sulfate                   | 84,580      | 79,972      | 80,017      | 77,623      |
| 164   | C-glycosyltryptophan*              | 38,375      | 28,156      | 26,892      | 42,941      |
| 1020  | cholesterol                        | 35,386,532  | 33,105,708  | 36,210,112  | 39,926,704  |
| 881   | choline                            | 892,647     | 2,108,159   | 2,168,710   | 1,975,017   |
| 582   | cis-aconitate                      | 660,396     | 654,765     | 848,362     | 895,162     |
| 641   | cis-vaccenate (18:1n7)             | 142,832     | 92,262      | 192,807     |             |
| 579   | citrate                            | 271,567,296 | 279,913,504 | 256,853,264 | 229,689,984 |
| 248   | citrulline                         | 164,472     | 99,062      | 118,712     | 103,896     |
| 259   | creatine                           | 3,249,477   | 3,702,736   | 3,753,894   | 3,788,817   |
| 260   | creatinine                         | 373,217     | 416,801     | 391,170     | 393,564     |
| 213   | cysteine                           | 1,439,629   | 402,681     | 606,589     | 971,630     |
| 819   | deoxycarnitine                     | 523,098     | 603,374     | 582,634     | 695,545     |
| 655   | dihomo-linoleate (20:2n6)          | 54,579      | 43,078      | 50,055      | 58,270      |
| 609   | dihomo-linolenate (20:3n3 or n6)   | 97,308      | 55,866      | 57,143      | 59,631      |
| 531   | dihydroxyacetone phosphate (DHAP)  |             |             | 36,202      |             |
| 3     | dimethylglycine                    | 306,640     | 193,695     | 256,734     | 276,553     |
| 613   | docosahexaenoate (DHA; 22:6n3)     | 193,359     | 74,426      | 110,271     | 175,133     |
| 611   | docosapentaenoate (n3 DPA; 22:5n3) | 99,741      | 33,554      | 56,770      | 79,940      |
| 610   | eicosapentaenoate (EPA; 20:5n3)    | 286,520     | 58,980      | 132,608     | 147,182     |
| 1565  | ergothioneine                      | 527,747     | 973,519     | 839,918     | 835,805     |
| 735   | erucamide                          | 348,482     | 990,856     | 106,333     | 279,766     |
| 1632  | erythritol                         | 2,388,445   | 762,988     | 1,085,846   | 1,349,400   |
| 453   | erythronate*                       | 564,772     | 349,645     | 407,211     | 553,933     |

|                                    | DARM-00015       | DARM-00016       | DARM-00017       | DARM-00018        |
|------------------------------------|------------------|------------------|------------------|-------------------|
|                                    | NHSCi 2003 C D28 | NHSCi 1866 T2    | NHSCi 1866 T2 D7 | NHSCi 1866 T2 D14 |
|                                    | 997729           | 997715           | 997736           | 997748            |
|                                    | 991360           | 991361           | 991362           | 991363            |
|                                    | NHSCi 2003 C D28 | NHSCi 1866 T2 D0 | NHSCi 1866 T2 D7 | NHSCi 1866 T2 D14 |
| C D28                              | T2 D0            | T2 D7            | T2 D14           |                   |
|                                    | 175.121          | 176.276          | 164.34           | 172.339           |
| C D28                              | T2 D0            | T2 D7            | T2 D14           |                   |
|                                    | 641,402          | 553,372          | 603,424          | 942,185           |
| 472 fructose                       | 91,205,144       | 62,306,108       | 74,201,088       | 79,748,064        |
| 524 fructose-6-phosphate           | 602,655          | 417,025          | 472,346          | 477,267           |
| 594 fumarate                       | 445,347          | 321,557          | 363,352          | 402,505           |
| 404 gamma-glutamylleucine          | 19,611           | 27,674           | 16,689           | 21,436            |
| 521 glucose                        | 1,038,950,976    | 1,010,169,664    | 1,061,818,688    | 1,085,405,312     |
| 519 glucose-6-phosphate (G6P)      | 1,796,014        | 1,160,047        | 1,612,947        | 1,263,673         |
| 39 glutamate                       | 4,997,358        | 7,168,533        | 7,080,612        | 7,595,470         |
| 44 glutamine                       | 1,192,279        | 1,877,726        | 1,544,420        | 1,460,887         |
| 80 glutaroyl carnitine             | 17,852           | 16,176           | 19,782           | 16,720            |
| 283 glutathione, oxidized (GSSG)   | 852,735          | 1,442,111        | 1,228,827        | 1,032,453         |
| 280 glutathione, reduced (GSH)     | 21,059,756       | 23,449,578       | 20,390,998       | 24,802,908        |
| 517 glycerate                      | 920,270          | 221,452          | 412,063          | 505,355           |
| 882 glycerol 3-phosphate (G3P)     | 305,658          | 387,761          | 302,234          | 298,426           |
| 883 glycerophosphorylcholine (GPC) | 157,840          | 144,957          | 145,898          | 143,193           |
| 1 glycine                          | 59,083,828       | 23,479,246       | 37,560,636       | 47,368,668        |
| 851 glycochenodeoxycholate         | 16,296           | 150,818          | 98,974           | 89,512            |
| 840 glycocholate                   | 6,863            | 58,682           | 49,881           | 51,519            |
| 849 glycodeoxycholate              | 8,151            | 43,610           | 39,689           | 37,498            |
| 1318 glycolate (hydroxyacetate)    | 412,571          | 323,106          | 432,862          | 445,637           |
| 1128 guanosine                     | 40,252           | 36,267           | 35,052           | 29,112            |
| 1212 heme*                         | 2,458,107        | 1,337,160        | 3,359,267        | 4,162,878         |
| 619 heptanoate (7:0)               | 20,413           | 12,629           | 19,636           | 14,543            |
| 823 hexanoylcarnitine              | 57,650           | 44,588           | 29,539           | 29,724            |
| 1288 hippurate                     | 52,762           | 54,942           | 49,193           | 49,802            |
| 50 histidine                       | 39,191           | 48,469           | 45,404           | 44,749            |

**PATHWAY SORT**

**ORDER**      **BIOCHEMICAL NAME**  
876 ethanolamine



| PATHWAY SORT<br>ORDER | BIOCHEMICAL NAME                                                        | DARM-00015       | DARM-00016       | DARM-00017       | DARM-00018        |
|-----------------------|-------------------------------------------------------------------------|------------------|------------------|------------------|-------------------|
|                       |                                                                         | NHSCi 2003 C D28 | NHSCi 1866 T2    | NHSCi 1866 T2 D7 | NHSCi 1866 T2 D14 |
|                       |                                                                         | 997729           | 997715           | 997736           | 997748            |
|                       |                                                                         | 991360           | 991361           | 991362           | 991363            |
|                       |                                                                         | NHSCi 2003 C D28 | NHSCi 1866 T2 D0 | NHSCi 1866 T2 D7 | NHSCi 1866 T2 D14 |
|                       |                                                                         | C D28            | T2 D0            | T2 D7            | T2 D14            |
|                       |                                                                         | 175.121          | 176.276          | 164.34           | 172.339           |
|                       |                                                                         | C D28            | T2 D0            | T2 D7            | T2 D14            |
|                       | 231 homocysteine                                                        | 101,404          | 18,296           | 28,609           | 63,628            |
|                       | 1585 homostachydrine*                                                   | 42,532           | 35,635           | 33,901           | 34,260            |
|                       | 206 hydroxyisovaleroyl carnitine                                        | 199,428          | 433,188          | 383,050          | 364,332           |
|                       | 1098 hypoxanthine                                                       | 5,726,936        | 184,379          | 188,554          | 1,010,152         |
|                       | 1101 inosine 5'-monophosphate (IMP)                                     | 210,439          | 164,643          | 340,178          | 524,568           |
|                       | Isobar: fructose 1,6-diphosphate, glucose 1,6-diphosphate, myo-inositol |                  |                  |                  |                   |
|                       | 527 1,4 or 1,3-diphosphate                                              | 60,260           | 59,340           | 62,915           | 52,665            |
|                       | 561 Isobar: ribulose 5-phosphate, xylulose 5-phosphate                  | 95,608           | 81,353           | 87,471           | 80,990            |
|                       | 496 Isobar: sorbitol, mannitol                                          | 17,766,824       | 18,403,908       | 18,956,124       | 18,274,208        |
|                       | 200 isobutyrylcarnitine                                                 | 136,153          | 179,779          | 169,293          | 147,503           |
|                       | 180 isoleucine                                                          | 4,660,911        | 4,070,097        | 4,618,131        | 4,576,028         |
|                       | 478 isomaltose                                                          | 2,150,195        | 1,501,424        | 2,617,697        | 2,077,336         |
|                       | 205 isovalerylcarnitine                                                 | 105,522          | 98,832           | 101,153          | 87,227            |
|                       | 144 kynurenine                                                          | 125,784          | 118,545          | 162,325          | 121,238           |
|                       | 536 lactate                                                             | 1,801,197,568    | 282,948,320      | 856,344,512      | 1,232,642,048     |
|                       | 1018 lathosterol                                                        | 77,125           |                  | 45,256           | 49,652            |
|                       | 625 laurate (12:0)                                                      | 131,042          | 90,667           | 103,770          | 118,520           |
|                       | 181 leucine                                                             | 8,996,487        | 8,485,215        | 9,793,614        | 10,022,278        |

|                                                | DARM-00015       | DARM-00016       | DARM-00017       | DARM-00018        |
|------------------------------------------------|------------------|------------------|------------------|-------------------|
|                                                | NHSCi 2003 C D28 | NHSCi 1866 T2    | NHSCi 1866 T2 D7 | NHSCi 1866 T2 D14 |
|                                                | 997729           | 997715           | 997736           | 997748            |
|                                                | 991360           | 991361           | 991362           | 991363            |
|                                                | NHSCi 2003 C D28 | NHSCi 1866 T2 D0 | NHSCi 1866 T2 D7 | NHSCi 1866 T2 D14 |
|                                                | C D28            | T2 D0            | T2 D7            | T2 D14            |
|                                                | 175.121          | 176.276          | 164.34           | 172.339           |
|                                                | C D28            | T2 D0            | T2 D7            | T2 D14            |
| 604 linoleate (18:2n6)                         | 2,854,648        | 2,121,206        | 2,520,759        | 2,934,382         |
| 608 linolenate [alpha or gamma; (18:3n3 or 6)] | 684,028          | 289,340          | 520,360          | 555,806           |
| 69 lysine                                      | 1,159,421        | 2,689,346        | 2,846,649        | 2,973,361         |
| 598 malate                                     | 1,817,132        | 1,183,954        | 1,605,431        | 1,604,171         |
| 482 maltose                                    | 1,300,158        | 1,004,487        | 1,156,125        | 1,235,795         |
| 487 mannose                                    | 13,775,427       | 12,921,835       | 13,585,284       | 14,283,581        |
| 489 mannose-6-phosphate                        | 295,219          | 205,612          | 214,854          | 215,244           |
| 635 margarate (17:0)                           | 473,674          | 327,403          | 397,583          | 450,271           |
| 658 mead acid (20:3n9)                         | 27,230           | 17,690           | 13,632           | 7,257             |
| 225 methionine                                 | 400,754          | 871,642          | 851,631          | 627,433           |
| 890 myo-inositol                               | 1,943,253        | 2,177,501        | 2,240,130        | 2,466,853         |
| 629 myristate (14:0)                           | 842,193          | 456,894          | 671,825          | 734,894           |
| 630 myristoleate (14:1n5)                      | 25,634           | 19,786           |                  | 27,574            |
| 1242.1 N1-Methyl-2-pyridone-5-carboxamide      | 226,365          | 128,853          | 112,583          | 131,173           |
| 75 N-6-trimethyllysine                         | 129,954          | 207,432          | 199,288          | 154,487           |
| 4 N-acetylglycine                              |                  | 60,738           | 81,754           | 90,906            |
| 227 N-acetylmethionine                         | 5,332            | 7,472            | 4,206            |                   |
| 455 N-acetylneuraminate                        | 148,623          | 41,797           | 82,781           | 83,927            |
| 1221 nicotinamide                              | 2,757,552        | 2,102,704        | 2,434,348        | 2,266,781         |
| 1224 nicotinamide adenine dinucleotide (NAD+)  | 2,285            | 3,452            | 4,281            | 8,362             |
| 825 octanoylcarnitine                          | 69,006           | 84,208           | 85,071           | 82,106            |
| 639 oleate (18:1n9)                            | 620,775          | 727,388          | 690,991          | 942,979           |
| 835 oleoylcarnitine                            | 588,338          | 344,844          | 1,004,542        | 1,699,879         |

**PATHWAY SORT**

**ORDER BIOCHEMICAL NAME**

|                               | DARM-00015       | DARM-00016       | DARM-00017       | DARM-00018        |
|-------------------------------|------------------|------------------|------------------|-------------------|
|                               | NHSCi 2003 C D28 | NHSCi 1866 T2    | NHSCi 1866 T2 D7 | NHSCi 1866 T2 D14 |
|                               | 997729           | 997715           | 997736           | 997748            |
|                               | 991360           | 991361           | 991362           | 991363            |
|                               | NHSCi 2003 C D28 | NHSCi 1866 T2 D0 | NHSCi 1866 T2 D7 | NHSCi 1866 T2 D14 |
|                               | C D28            | T2 D0            | T2 D7            | T2 D14            |
|                               | 175.121          | 176.276          | 164.34           | 172.339           |
|                               | C D28            | T2 D0            | T2 D7            | T2 D14            |
|                               |                  | 184,491          | 61,277           | 22,451            |
| 244 ornithine                 | 12,108,834       | 11,520,120       | 13,073,590       | 14,296,622        |
| 632 palmitate (16:0)          | 8,343,986        | 7,214,126        | 7,140,379        | 7,853,787         |
| 633 palmitoleate (16:1n7)     | 643,264          | 251,585          | 372,897          | 380,516           |
| 1004 palmitoyl sphingomyelin  | 15,744,304       | 14,751,954       | 15,966,146       | 17,801,990        |
| 833 palmitoylcarnitine        | 448,923          | 231,236          | 538,860          | 916,355           |
| 1243 pantothenate             | 111,153          | 94,658           | 100,994          | 100,503           |
| 1613 paraxanthine             | 511,703          | 388,352          | 525,707          | 512,656           |
| 88 p-cresol sulfate           | 76,301           | 45,396           | 45,541           | 45,250            |
| 621 pelargonate (9:0)         | 327,609          | 172,490          | 370,622          | 309,845           |
| 631 pentadecanoate (15:0)     | 222,446          | 166,204          | 200,364          | 228,140           |
| 135 phenol sulfate            | 19,582           | 19,408           | 18,741           | 17,671            |
| 128 phenylacetylglutamine     | 80,435           | 42,162           | 41,085           | 44,814            |
| 83 phenylalanine              | 10,595,847       | 6,835,470        | 8,864,478        | 9,102,095         |
| 602 phosphate                 | 1,339,702,400    | 1,002,410,304    | 1,223,869,696    | 1,298,603,008     |
| 534 phosphoenolpyruvate (PEP) | 43,910           | 239,214          | 108,179          | 32,033            |
| 877 phosphoethanolamine       | 65,341           | 74,125           | 80,273           | 110,292           |
| 74 pipecolate                 | 106,018          | 81,418           | 105,961          | 86,742            |
| 1531 piperine                 | 91,726           | 171,368          | 158,498          | 96,931            |
| 246 proline                   | 2,149,858        | 2,163,042        | 2,082,362        | 2,052,232         |
| 809 propionylcarnitine        | 626,733          | 1,427,119        | 1,222,332        | 1,100,619         |
| 1181 pseudouridine            | 11,694           | 8,866            | 9,968            | 8,311             |
| 45 pyroglutamine*             | 62,240           | 173,894          | 187,319          | 172,320           |
| 603 pyrophosphate (PPi)       | 35,022           | 148,198          | 171,827          | 84,463            |

**PATHWAY SORT**

**ORDER BIOCHEMICAL NAME**

285 ophthalmate

244 ornithine

632 palmitate (16:0)

633 palmitoleate (16:1n7)

1004 palmitoyl sphingomyelin

833 palmitoylcarnitine

1243 pantothenate

1613 paraxanthine

88 p-cresol sulfate

621 pelargonate (9:0)

631 pentadecanoate (15:0)

135 phenol sulfate

128 phenylacetylglutamine

83 phenylalanine

602 phosphate

534 phosphoenolpyruvate (PEP)

877 phosphoethanolamine

74 pipecolate

1531 piperine

246 proline

809 propionylcarnitine

1181 pseudouridine

45 pyroglutamine\*

603 pyrophosphate (PPi)

| DARM-00015       | DARM-00016       | DARM-00017       | DARM-00018        |
|------------------|------------------|------------------|-------------------|
| NHSCi 2003 C D28 | NHSCI 1866 T2    | NHSCI 1866 T2 D7 | NHSCI 1866 T2 D14 |
| 997729           | 997715           | 997736           | 997748            |
| 991360           | 991361           | 991362           | 991363            |
| NHSCi 2003 C D28 | NHSCI 1866 T2 D0 | NHSCI 1866 T2 D7 | NHSCI 1866 T2 D14 |
| C D28            | T2 D0            | T2 D7            | T2 D14            |
| 175.121          | 176.276          | 164.34           | 172.339           |

**PATHWAY SORT**

| ORDER | BIOCHEMICAL NAME             | C D28     | T2 D0     | T2 D7     | T2 D14    |
|-------|------------------------------|-----------|-----------|-----------|-----------|
| 535   | pyruvate                     | 1,383,204 | 3,683,327 | 3,732,736 | 1,684,570 |
| 1469  | ranitidine                   | 378,825   |           |           |           |
| 548   | ribitol                      | 254,906   | 169,871   | 273,815   | 134,022   |
| 557   | ribose 5-phosphate           | 140,262   | 125,677   | 110,459   | 111,884   |
| 559   | ribulose                     | 17,431    | 29,385    | 17,277    | 18,080    |
| 224   | S-adenosylhomocysteine (SAH) | 243,619   | 134,789   | 219,723   | 194,554   |
| 551   | sedoheptulose-7-phosphate    | 84,948    | 18,377    | 71,220    | 85,223    |
| 8     | serine                       | 7,395,738 | 7,074,594 | 8,687,528 | 8,759,669 |
| 216   | S-methylcysteine             | 206,354   | 71,654    | 72,071    | 53,316    |
| 281   | S-methylglutathione          | 28,458    | 20,277    | 43,484    | 27,756    |
| 270   | spermidine                   | 1,335,984 | 1,430,269 | 1,618,862 | 1,603,250 |
| 1584  | stachydrine                  | 183,012   | 3,405,363 | 3,532,005 | 3,353,102 |
| 637   | stearate (18:0)              | 7,997,423 | 6,666,030 | 7,771,983 | 8,372,065 |
| 1005  | stearoyl sphingomyelin       | 1,438,372 | 1,084,208 | 1,064,038 | 1,322,722 |
| 834   | stearoylcarnitine            | 318,485   | 146,101   | 380,748   | 709,417   |
| 591   | succinylcarnitine            | 399,279   | 571,063   | 601,544   | 613,988   |
| 1662  | terephthalic acid            | 222,876   | 384,837   | 347,127   | 428,126   |
| 1614  | theobromine                  | 362,523   | 169,101   | 139,337   | 341,773   |
| 1615  | theophylline                 | 127,469   | 94,936    | 86,851    | 92,224    |
| 549   | threitol                     | 1,508,355 | 671,375   | 827,647   | 962,741   |
| 1199  | threonate                    | 535,658   | 478,661   | 532,947   | 529,854   |
| 17    | threonine                    | 182,269   | 190,291   | 237,555   | 262,031   |
| 252   | trans-4-hydroxyproline       | 43,731    | 27,048    | 23,987    | 26,953    |

| DARM-00015       | DARM-00016       | DARM-00017       | DARM-00018        |         |
|------------------|------------------|------------------|-------------------|---------|
| NHSCi 2003 C D28 | NHSCi 1866 T2    | NHSCi 1866 T2 D7 | NHSCi 1866 T2 D14 |         |
|                  | 997729           | 997715           | 997736            | 997748  |
|                  | 991360           | 991361           | 991362            | 991363  |
| NHSCi 2003 C D28 | NHSCi 1866 T2 D0 | NHSCi 1866 T2 D7 | NHSCi 1866 T2 D14 |         |
| C D28            | T2 D0            | T2 D7            | T2 D14            |         |
|                  | 175.121          | 176.276          | 164.34            | 172.339 |
| C D28            | T2 D0            | T2 D7            | T2 D14            |         |

**PATHWAY SORT**

**ORDER            BIOCHEMICAL NAME**

|                                                      |            |            |            |            |
|------------------------------------------------------|------------|------------|------------|------------|
| 501 trehalose                                        | 996,469    | 157,424    | 621,208    | 1,077,238  |
| 1242 trigonelline (N <sup>1</sup> -methylnicotinate) | 259,666    | 490,459    | 492,993    | 486,486    |
| 145 tryptophan                                       | 4,533,571  | 3,590,607  | 4,486,706  | 4,359,510  |
| 151 tryptophan betaine                               | 1,521,566  | 4,557,345  | 4,402,292  | 4,252,671  |
| 99 tyrosine                                          | 2,238,650  | 2,410,461  | 2,769,754  | 2,872,390  |
| 1149 urate                                           | 153,368    | 214,504    | 183,618    | 163,812    |
| 245 urea                                             | 34,159,176 | 23,854,346 | 28,532,186 | 28,787,614 |
| 1180 uridine                                         | 20,164     | 27,493     | 30,559     | 35,443     |
| 190 valine                                           | 9,392,703  | 9,301,228  | 10,405,112 | 11,047,712 |
| 565 xylitol                                          | 12,425     |            |            |            |
| 570 xylonate                                         | 87,714     | 63,458     | 48,256     | 75,641     |
| 569 xylose                                           | 83,277     |            | 124,820    | 91,754     |

| PATHWAY SORT<br>ORDER | BIOCHEMICAL NAME                                   | DARM-00019        | DARM-00020        | DARM-00021       | DARM-00022       |
|-----------------------|----------------------------------------------------|-------------------|-------------------|------------------|------------------|
|                       |                                                    | NHSCI 1866 T2 D21 | NHSCI 1866 T2 D28 | NHSCI 1866 T1    | NHSCI 1866 T1 D7 |
|                       |                                                    | 997740            | 997720            | 997746           | 997738           |
|                       |                                                    | 991364            | 991365            | 991366           | 991367           |
|                       |                                                    | NHSCI 1866 T2 D21 | NHSCI 1866 T2 D28 | NHSCI 1866 T1 D0 | NHSCI 1866 T1 D7 |
|                       |                                                    | T2 D21            | T2 D28            | T1 D0            | T1 D7            |
|                       |                                                    | 203.125           | 169.237           | 179.08           | 165.545          |
|                       |                                                    | T2 D21            | T2 D28            | T1 D0            | T1 D7            |
| 905                   | 1,2-propanediol                                    | 12,988,405        | 17,579,018        | 4,883,337        | 11,158,786       |
| 532                   | 1,3-dihydroxyacetone                               | 71,598            | 87,438            | 95,508           | 58,140           |
| 515                   | 1,5-anhydroglucitol (1,5-AG)                       | 7,769,879         | 6,815,589         | 6,894,500        | 6,652,106        |
| 523                   | 1,6-anhydroglucose                                 | 313,780           | 298,975           | 327,056          | 482,878          |
| 636                   | 10-heptadecenoate (17:1n7)                         | 99,381            | 121,017           | 58,306           | 82,459           |
| 742                   | 13-methylmyristic acid                             | 118,800           | 195,899           | 82,759           | 99,940           |
| 744                   | 15-methylpalmitate (isobar with 2-methylpalmitate) | 275,938           | 439,076           | 117,415          | 189,105          |
| 919                   | 1-arachidonoylglycerophosphoethanolamine*          | 31,432            | 25,317            | 23,213           | 19,593           |
| 938                   | 1-linoleoylglycerophosphocholine                   | 272,364           | 335,274           | 233,853          | 239,863          |
| 926                   | 1-myristoylglycerophosphocholine                   | 64,906            | 79,486            |                  | 87,388           |
| 936                   | 1-oleoylglycerophosphocholine                      | 392,551           | 976,080           | 132,943          | 1,797,474        |
| 915                   | 1-oleoylglycerophosphoethanolamine                 | 17,977            | 22,455            | 16,684           | 9,933            |
| 970                   | 1-palmitoylglycerol (1-monopalmitin)               | 44,231            | 63,395            | 20,584           | 45,829           |
| 929                   | 1-palmitoylglycerophosphocholine                   | 2,302,004         | 5,330,005         | 762,895          | 8,022,161        |
| 909                   | 1-palmitoylglycerophosphoethanolamine              | 16,633            | 24,392            | 13,802           | 15,749           |
| 934                   | 1-stearoylglycerophosphocholine                    | 1,479,612         | 2,051,804         | 261,966          | 3,126,313        |
| 533                   | 2,3-diphosphoglycerate                             | 3,820             |                   | 424,122          | 476,646          |
| 263                   | 2-aminobutyrate                                    | 2,866,594         | 2,636,668         | 2,360,075        | 2,292,059        |
| 945                   | 2-arachidonoylglycerophosphocholine*               | 182,369           | 214,159           | 83,937           | 406,006          |
| 920                   | 2-arachidonoylglycerophosphoethanolamine*          | 1,710,407         | 1,987,412         | 404,129          | 3,423,001        |
| 923                   | 2-docosahexaenoylglycerophosphoethanolamine*       | 325,072           | 350,497           | 120,514          | 822,177          |
| 922                   | 2-docosapentaenoylglycerophosphoethanolamine*      | 504,217           | 540,002           | 150,283          | 1,058,896        |
| 1360                  | 2-ethylhexanoate (isobar with 2-propylpentanoate)  | 29,405            | 27,464            | 21,764           | 38,147           |
| 229                   | 2-hydroxybutyrate (AHB)                            | 1,824,982         | 1,624,975         | 1,755,588        | 1,668,014        |
| 714                   | 2-hydroxyglutarate                                 | 183,311           | 267,356           | 86,275           | 293,229          |
| 706                   | 2-hydroxypalmitate                                 | 41,185            | 53,740            | 34,513           | 45,504           |
| 939                   | 2-linoleoylglycerophosphocholine*                  | 358,967           | 266,997           |                  | 603,328          |

| DARM-00019        | DARM-00020        | DARM-00021       | DARM-00022       |         |
|-------------------|-------------------|------------------|------------------|---------|
| NHSCI 1866 T2 D21 | NHSCI 1866 T2 D28 | NHSCI 1866 T1    | NHSCI 1866 T1 D7 |         |
|                   | 997740            | 997720           | 997746           | 997738  |
|                   | 991364            | 991365           | 991366           | 991367  |
| NHSCI 1866 T2 D21 | NHSCI 1866 T2 D28 | NHSCI 1866 T1 D0 | NHSCI 1866 T1 D7 |         |
| T2 D21            | T2 D28            | T1 D0            | T1 D7            |         |
|                   | 203.125           | 169.237          | 179.08           | 165.545 |

**PATHWAY SORT**

| ORDER | BIOCHEMICAL NAME                   | T2 D21     | T2 D28     | T1 D0      | T1 D7      |
|-------|------------------------------------|------------|------------|------------|------------|
| 202   | 2-methylbutyrylcarnitine           | 59,511     | 65,353     | 59,371     | 54,524     |
| 937   | 2-oleoylglycerophosphocholine*     | 125,320    | 187,515    | 83,221     | 408,239    |
| 930   | 2-palmitoylglycerophosphocholine*  | 382,178    | 456,156    | 41,157     | 677,752    |
| 935   | 2-stearoylglycerophosphocholine*   | 137,857    | 141,873    | 17,302     | 168,910    |
| 821   | 3-dehydrocarnitine*                | 1,041,111  | 1,180,521  | 919,964    | 1,024,916  |
| 170   | 3-indoxyl sulfate                  | 4,891      | 4,909      | 3,088      | 3,604      |
| 172   | 3-methyl-2-oxobutyrate             | 43,501     | 35,532     | 26,163     |            |
| 173   | 3-methyl-2-oxovalerate             | 62,630     | 58,615     | 45,616     | 28,256     |
| 529   | 3-phosphoglycerate                 | 339,502    | 337,094    | 2,994,259  | 1,768,015  |
| 193   | 4-methyl-2-oxopentanoate           | 116,109    | 100,533    | 91,059     | 43,289     |
| 266   | 5-methylthioadenosine (MTA)        | 131,980    | 100,486    | 50,073     | 124,318    |
| 282   | 5-oxoproline                       | 389,006    | 561,164    | 60,006     | 215,000    |
| 545   | 6-phosphogluconate                 |            | 59,070     | 65,019     | 49,694     |
| 1024  | 7-beta-hydroxycholesterol          |            | 31,852     | 39,027     | 25,325     |
| 712.5 | 9,10-epoxyoctadec-12(Z)-enoic acid | 184,958    | 230,491    | 15,807     | 112,411    |
| 672   | 9,10-epoxystearate                 | 8,035,032  | 10,290,958 | 262,413    | 5,419,621  |
| 822   | acetylcarnitine                    | 3,643,731  | 3,616,617  | 3,699,032  | 3,956,132  |
| 601   | acetylphosphate                    | 3,549,777  | 3,362,782  | 3,269,842  | 3,340,224  |
| 1105  | adenine                            | 14,296,981 | 10,888,939 | 38,773,896 | 39,361,264 |
| 1106  | adenosine                          | 27,384     | 30,660     | 16,531     | 33,120     |
| 1116  | adenosine 5'-diphosphate (ADP)     | 173,006    | 179,982    | 169,042    | 148,837    |
| 1232  | adenosine 5'diphosphoribose        | 90,260     | 75,788     | 97,530     | 119,749    |
| 1114  | adenosine 5'-monophosphate (AMP)   | 5,220,412  | 7,785,904  | 2,825,064  | 3,599,888  |
| 665   | adrenate (22:4n6)                  | 139,089    | 129,986    | 251,158    | 40,106     |

| PATHWAY SORT<br>ORDER | BIOCHEMICAL NAME         | DARM-00019        | DARM-00020        | DARM-00021       | DARM-00022       |
|-----------------------|--------------------------|-------------------|-------------------|------------------|------------------|
|                       |                          | NHSCI 1866 T2 D21 | NHSCI 1866 T2 D28 | NHSCI 1866 T1    | NHSCI 1866 T1 D7 |
|                       |                          | 997740            | 997720            | 997746           | 997738           |
|                       |                          | 991364            | 991365            | 991366           | 991367           |
|                       |                          | NHSCI 1866 T2 D21 | NHSCI 1866 T2 D28 | NHSCI 1866 T1 D0 | NHSCI 1866 T1 D7 |
|                       |                          | T2 D21            | T2 D28            | T1 D0            | T1 D7            |
|                       |                          | 203.125           | 169.237           | 179.08           | 165.545          |
|                       |                          | T2 D21            | T2 D28            | T1 D0            | T1 D7            |
|                       |                          | 69,618,664        | 70,075,624        | 49,597,364       | 52,059,648       |
| 27                    | alanine                  |                   |                   |                  |                  |
| 1150                  | allantoin                | 33,353            | 34,494            | 13,333           | 22,227           |
| 179                   | alpha-hydroxyisocaproate | 272,954           | 388,477           |                  | 257,854          |
| 198                   | alpha-hydroxyisovalerate | 610,933           | 905,115           | 501,450          | 1,242,532        |
| 1266                  | alpha-tocopherol         | 164,265           | 147,588           | 161,150          | 130,569          |
| 1034                  | androsterone sulfate     | 7,775             | 8,716             | 7,495            | 8,312            |
| 566                   | arabinose                | 327,335           | 363,255           | 359,675          | 409,806          |
| 546                   | arabitol                 | 650,758           | 587,747           | 492,839          | 781,818          |
| 1202                  | arabonate                | 87,604            | 111,541           | 91,880           | 107,463          |
| 659                   | arachidonate (20:4n6)    | 1,035,176         | 1,445,696         | 415,619          | 641,629          |
| 241                   | arginine                 | 823,418           | 2,158,228         | 674,520          | 847,895          |
| 25                    | asparagine               | 1,355,122         | 1,037,958         | 1,632,671        | 1,672,673        |
| 24                    | aspartate                | 4,061,158         | 3,382,174         | 4,605,921        | 4,713,740        |
| 721                   | azelate (nonanedioate)   | 42,878            | 49,992            | 5,912            | 17,650           |
| 26                    | beta-alanine             | 150,330           | 58,525            | 155,782          | 151,518          |
| 7                     | beta-hydroxypyruvate     | 263,380           | 307,563           | 255,303          | 262,860          |
| 22                    | betaine                  | 1,661,101         | 1,652,498         | 1,592,822        | 1,685,309        |
| 1057                  | beta-sitosterol          | 51,142            | 46,068            | 45,816           | 46,029           |
| 1216                  | biliverdin               | 60,683            | 49,190            | 18,414           | 86,882           |



| DARM-00019        | DARM-00020        | DARM-00021       | DARM-00022       |         |
|-------------------|-------------------|------------------|------------------|---------|
| NHSCI 1866 T2 D21 | NHSCI 1866 T2 D28 | NHSCI 1866 T1    | NHSCI 1866 T1 D7 |         |
|                   | 997740            | 997720           | 997746           | 997738  |
|                   | 991364            | 991365           | 991366           | 991367  |
| NHSCI 1866 T2 D21 | NHSCI 1866 T2 D28 | NHSCI 1866 T1 D0 | NHSCI 1866 T1 D7 |         |
| T2 D21            | T2 D28            | T1 D0            | T1 D7            |         |
|                   | 203.125           | 169.237          | 179.08           | 165.545 |

**PATHWAY SORT**

**ORDER            BIOCHEMICAL NAME**

| T2 D21 | T2 D28      | T1 D0       | T1 D7       |             |
|--------|-------------|-------------|-------------|-------------|
|        | 15,882      | 14,181      | 28,350      | 16,237      |
|        | 3,541,355   | 3,056,576   | 2,968,486   | 3,125,682   |
|        | 229,315     |             |             | 205,461     |
|        | 31,823      | 34,835      | 16,366      | 25,727      |
|        | 43,562      | 51,821      | 43,667      | 57,151      |
|        | 60,793      | 54,301      | 19,984      | 62,170      |
|        | 975,356     | 1,027,886   | 972,927     | 989,284     |
|        | 78,314      | 80,056      | 80,586      | 83,616      |
|        | 36,197      | 26,920      | 26,946      | 24,759      |
|        | 37,924,164  | 36,418,236  | 37,268,052  | 36,268,140  |
|        | 2,121,928   | 2,141,355   | 2,136,781   | 2,176,103   |
|        | 948,779     | 1,049,116   | 548,775     | 845,962     |
|        | 191,206     | 122,033     | 156,317     | 335,037     |
|        | 214,941,248 | 182,096,240 | 301,815,680 | 271,697,088 |
|        |             |             |             |             |
|        | 132,630     | 112,217     | 110,256     | 101,075     |
|        | 3,726,428   | 3,760,821   | 3,528,599   | 3,766,965   |
|        | 453,973     | 421,680     | 407,646     | 370,191     |
|        |             |             |             |             |
|        | 1,469,723   | 1,499,818   | 486,877     | 418,808     |
|        | 567,749     | 604,672     | 516,383     | 581,091     |
|        | 68,472      | 97,515      | 36,918      | 60,112      |
|        | 85,816      | 106,351     | 47,939      | 59,294      |
|        |             |             |             |             |
|        | 36,450      | 14,876      | 1,726,288   | 3,554,937   |
|        |             |             |             |             |
|        | 490,315     | 405,000     | 270,058     | 234,698     |
|        | 198,626     | 240,531     | 72,313      | 153,300     |
|        | 93,726      | 133,260     | 35,471      | 61,087      |
|        | 191,871     | 211,947     | 154,648     | 145,613     |
|        | 825,681     | 947,207     | 730,661     | 812,798     |
|        | 322,761     | 205,025     | 864,326     | 368,533     |
|        | 1,583,447   | 1,723,622   | 864,946     | 1,406,027   |
|        | 544,325     | 632,895     | 349,267     | 573,851     |

|              |                                | DARM-00019        | DARM-00020        | DARM-00021       | DARM-00022       |         |
|--------------|--------------------------------|-------------------|-------------------|------------------|------------------|---------|
|              |                                | NHSCI 1866 T2 D21 | NHSCI 1866 T2 D28 | NHSCI 1866 T1    | NHSCI 1866 T1 D7 |         |
|              |                                |                   | 997740            | 997720           | 997746           | 997738  |
|              |                                |                   | 991364            | 991365           | 991366           | 991367  |
|              |                                | NHSCI 1866 T2 D21 | NHSCI 1866 T2 D28 | NHSCI 1866 T1 D0 | NHSCI 1866 T1 D7 |         |
|              |                                | T2 D21            | T2 D28            | T1 D0            | T1 D7            |         |
|              |                                |                   | 203.125           | 169.237          | 179.08           | 165.545 |
| PATHWAY SORT |                                | T2 D21            | T2 D28            | T1 D0            | T1 D7            |         |
| ORDER        | BIOCHEMICAL NAME               |                   | 817,581           | 449,802          | 398,511          | 614,570 |
| 876          | ethanolamine                   |                   |                   |                  |                  |         |
| 472          | fructose                       | 84,917,432        | 76,978,512        | 61,459,480       | 46,021,040       |         |
| 524          | fructose-6-phosphate           | 348,462           | 558,766           | 199,972          | 460,074          |         |
| 594          | fumarate                       | 452,332           | 677,878           | 298,892          | 557,441          |         |
| 404          | gamma-glutamylleucine          | 20,341            |                   | 29,980           | 33,534           |         |
| 521          | glucose                        | 1,036,868,032     | 1,081,754,368     | 1,063,524,672    | 1,053,441,792    |         |
| 519          | glucose-6-phosphate (G6P)      | 992,712           | 1,678,752         | 325,699          | 219,862          |         |
| 39           | glutamate                      | 6,926,577         | 7,878,551         | 7,916,416        | 8,248,287        |         |
| 44           | glutamine                      | 1,349,251         | 1,070,462         | 1,897,135        | 1,391,232        |         |
| 80           | glutaroyl carnitine            | 20,693            | 17,280            | 13,402           | 12,278           |         |
| 283          | glutathione, oxidized (GSSG)   | 904,246           | 913,998           | 1,700,524        | 1,169,490        |         |
| 280          | glutathione, reduced (GSH)     | 22,826,626        | 19,206,434        | 24,510,320       | 18,046,108       |         |
| 517          | glycerate                      | 705,096           | 710,916           | 335,496          | 2,455,053        |         |
| 882          | glycerol 3-phosphate (G3P)     | 336,971           | 295,156           | 760,290          | 1,057,582        |         |
| 883          | glycerophosphorylcholine (GPC) | 145,826           | 139,502           | 153,165          | 146,334          |         |
| 1            | glycine                        | 54,611,724        | 70,597,176        | 27,344,856       | 32,933,818       |         |
| 851          | glycochenodeoxycholate         | 105,234           | 93,996            | 95,013           | 106,437          |         |
| 840          | glycocholate                   | 58,328            | 60,700            | 51,839           | 55,294           |         |
| 849          | glycodeoxycholate              | 46,414            | 44,025            | 27,804           | 32,978           |         |
| 1318         | glycolate (hydroxyacetate)     | 377,606           | 350,231           | 366,458          | 371,036          |         |
| 1128         | guanosine                      | 17,236            | 25,314            | 28,931           | 31,015           |         |
| 1212         | heme*                          | 2,404,961         | 2,028,298         | 2,018,425        | 9,060,939        |         |
| 619          | heptanoate (7:0)               | 17,772            | 19,096            | 7,078            | 16,347           |         |
| 823          | hexanoylcarnitine              | 26,931            | 41,797            | 32,801           | 40,053           |         |
| 1288         | hippurate                      | 48,748            | 48,988            | 46,846           | 53,650           |         |
| 50           | histidine                      | 42,787            | 40,189            | 48,047           | 41,588           |         |

|                     | DARM-00019                                                              | DARM-00020        | DARM-00021       | DARM-00022       |               |
|---------------------|-------------------------------------------------------------------------|-------------------|------------------|------------------|---------------|
|                     | NHSCI 1866 T2 D21                                                       | NHSCI 1866 T2 D28 | NHSCI 1866 T1    | NHSCI 1866 T1 D7 |               |
|                     | 997740                                                                  | 997720            | 997746           | 997738           |               |
|                     | 991364                                                                  | 991365            | 991366           | 991367           |               |
|                     | NHSCI 1866 T2 D21                                                       | NHSCI 1866 T2 D28 | NHSCI 1866 T1 D0 | NHSCI 1866 T1 D7 |               |
|                     | T2 D21                                                                  | T2 D28            | T1 D0            | T1 D7            |               |
|                     | 203.125                                                                 | 169.237           | 179.08           | 165.545          |               |
| <b>PATHWAY SORT</b> |                                                                         |                   |                  |                  |               |
| <b>ORDER</b>        | <b>BIOCHEMICAL NAME</b>                                                 | T2 D21            | T2 D28           | T1 D0            | T1 D7         |
| 231                 | homocysteine                                                            | 83,562            | 69,119           | 26,772           | 35,380        |
| 1585                | homostachydrine*                                                        | 41,734            | 25,645           | 39,915           | 25,749        |
| 206                 | hydroxyisovaleroyl carnitine                                            | 403,540           | 361,707          | 321,621          | 371,607       |
| 1098                | hypoxanthine                                                            | 3,746,092         | 7,582,735        | 218,018          | 15,006,904    |
| 1101                | inosine 5'-monophosphate (IMP)                                          | 435,611           | 507,463          | 199,428          | 242,285       |
|                     | Isobar: fructose 1,6-diphosphate, glucose 1,6-diphosphate, myo-inositol |                   |                  |                  |               |
| 527                 | 1,4 or 1,3-diphosphate                                                  | 46,635            | 47,458           | 159,838          | 470,896       |
| 561                 | Isobar: ribulose 5-phosphate, xylulose 5-phosphate                      | 62,697            | 92,875           | 415,389          | 526,939       |
| 496                 | Isobar: sorbitol, mannitol                                              | 19,596,932        | 18,810,812       | 20,693,838       | 19,441,930    |
| 200                 | isobutyrylcarnitine                                                     | 147,053           | 145,159          | 155,481          | 139,957       |
| 180                 | isoleucine                                                              | 4,776,263         | 4,879,193        | 4,081,148        | 5,524,639     |
| 478                 | isomaltose                                                              | 1,987,299         | 1,835,022        | 3,797,408        | 1,921,827     |
| 205                 | isovalerylcarnitine                                                     | 94,873            | 94,547           | 94,705           | 102,380       |
| 144                 | kynurenine                                                              | 159,947           | 123,647          | 171,047          | 150,418       |
| 536                 | lactate                                                                 | 1,464,920,448     | 1,629,336,448    | 410,955,296      | 1,221,739,776 |
| 1018                | lathosterol                                                             | 52,650            |                  |                  |               |
| 625                 | laurate (12:0)                                                          | 126,880           | 135,917          | 107,314          | 130,118       |
| 181                 | leucine                                                                 | 10,317,954        | 11,209,174       | 7,826,979        | 11,076,082    |

| DARM-00019        | DARM-00020        | DARM-00021       | DARM-00022       |
|-------------------|-------------------|------------------|------------------|
| NHSCI 1866 T2 D21 | NHSCI 1866 T2 D28 | NHSCI 1866 T1    | NHSCI 1866 T1 D7 |
| 997740            | 997720            | 997746           | 997738           |
| 991364            | 991365            | 991366           | 991367           |
| NHSCI 1866 T2 D21 | NHSCI 1866 T2 D28 | NHSCI 1866 T1 D0 | NHSCI 1866 T1 D7 |
| T2 D21            | T2 D28            | T1 D0            | T1 D7            |
| 203.125           | 169.237           | 179.08           | 165.545          |

**PATHWAY SORT**

| ORDER  | BIOCHEMICAL NAME                           | T2 D21     | T2 D28     | T1 D0      | T1 D7      |
|--------|--------------------------------------------|------------|------------|------------|------------|
| 604    | linoleate (18:2n6)                         | 3,488,389  | 4,216,679  | 1,893,378  | 3,325,434  |
| 608    | linolenate [alpha or gamma; (18:3n3 or 6)] | 585,315    | 797,433    | 463,198    | 632,529    |
| 69     | lysine                                     | 2,735,003  | 2,312,196  | 2,787,946  | 2,883,800  |
| 598    | malate                                     | 1,849,524  | 2,396,799  | 982,479    | 2,436,818  |
| 482    | maltose                                    | 1,114,331  | 1,071,442  | 1,199,963  | 1,161,170  |
| 487    | mannose                                    | 13,174,139 | 12,421,385 | 14,402,010 | 12,403,063 |
| 489    | mannose-6-phosphate                        | 178,214    | 239,605    | 108,630    | 284,746    |
| 635    | margarate (17:0)                           | 490,851    | 747,239    | 285,902    | 422,281    |
| 658    | mead acid (20:3n9)                         | 23,696     | 9,927      | 6,654      | 11,098     |
| 225    | methionine                                 | 519,521    | 442,595    | 884,048    | 788,060    |
| 890    | myo-inositol                               | 2,382,103  | 1,935,200  | 2,619,273  | 2,420,938  |
| 629    | myristate (14:0)                           | 884,099    | 963,766    | 382,467    | 737,971    |
| 630    | myristoleate (14:1n5)                      | 31,564     | 38,529     | 17,273     | 26,865     |
| 1242.1 | N1-Methyl-2-pyridone-5-carboxamide         | 225,900    | 140,357    | 207,537    | 107,726    |
| 75     | N-6-trimethyllysine                        | 203,543    | 175,609    | 224,147    | 175,826    |
| 4      | N-acetylglycine                            | 58,161     | 82,589     | 82,780     | 67,347     |
| 227    | N-acetylmethionine                         | 7,385      | 5,726      | 4,067      | 6,335      |
| 455    | N-acetylneuraminate                        | 91,039     | 89,395     | 31,680     | 84,752     |
| 1221   | nicotinamide                               | 2,276,759  | 2,900,386  | 2,084,399  | 2,805,582  |
| 1224   | nicotinamide adenine dinucleotide (NAD+)   | 8,043      | 3,893      | 8,691      | 9,748      |
| 825    | octanoylcarnitine                          | 88,502     | 75,900     | 58,972     | 69,756     |
| 639    | oleate (18:1n9)                            | 1,009,422  | 828,776    | 907,505    | 910,789    |
| 835    | oleoylcarnitine                            | 1,544,235  | 1,489,540  | 313,945    | 2,955,699  |

|                               | DARM-00019        | DARM-00020        | DARM-00021       | DARM-00022       |
|-------------------------------|-------------------|-------------------|------------------|------------------|
|                               | NHSCI 1866 T2 D21 | NHSCI 1866 T2 D28 | NHSCI 1866 T1    | NHSCI 1866 T1 D7 |
|                               | 997740            | 997720            | 997746           | 997738           |
|                               | 991364            | 991365            | 991366           | 991367           |
|                               | NHSCI 1866 T2 D21 | NHSCI 1866 T2 D28 | NHSCI 1866 T1 D0 | NHSCI 1866 T1 D7 |
|                               | T2 D21            | T2 D28            | T1 D0            | T1 D7            |
|                               | 203.125           | 169.237           | 179.08           | 165.545          |
|                               | T2 D21            | T2 D28            | T1 D0            | T1 D7            |
|                               | 19,017            |                   | 227,185          | 97,437           |
| 244 ornithine                 | 13,163,223        | 9,595,782         | 10,832,294       | 12,721,358       |
| 632 palmitate (16:0)          | 8,226,684         | 11,159,390        | 5,431,364        | 7,438,743        |
| 633 palmitoleate (16:1n7)     | 635,560           | 557,851           | 364,918          | 477,093          |
| 1004 palmitoyl sphingomyelin  | 16,440,715        | 15,896,092        | 14,012,885       | 16,431,550       |
| 833 palmitoylcarnitine        | 807,041           | 825,461           | 200,078          | 1,440,512        |
| 1243 pantothenate             | 115,021           | 101,784           | 99,612           | 104,805          |
| 1613 paraxanthine             | 514,252           | 471,959           | 438,211          | 501,931          |
| 88 p-cresol sulfate           | 48,933            | 42,918            | 40,529           | 45,665           |
| 621 pelargonate (9:0)         | 354,666           | 398,180           | 123,418          | 303,302          |
| 631 pentadecanoate (15:0)     | 245,416           | 308,371           | 174,751          | 229,888          |
| 135 phenol sulfate            | 18,254            | 18,729            | 19,500           | 21,576           |
| 128 phenylacetylglutamine     | 40,842            | 48,882            | 43,617           | 43,380           |
| 83 phenylalanine              | 9,432,172         | 9,297,807         | 7,104,701        | 9,035,316        |
| 602 phosphate                 | 1,310,245,504     | 1,264,968,192     | 877,120,960      | 742,547,264      |
| 534 phosphoenolpyruvate (PEP) | 25,115            | 16,771            | 465,258          | 302,786          |
| 877 phosphoethanolamine       | 92,849            | 90,439            | 133,297          | 61,514           |
| 74 pipecolate                 | 88,160            | 112,236           | 97,249           | 105,482          |
| 1531 piperine                 | 113,691           | 84,138            | 101,004          | 157,842          |
| 246 proline                   | 2,234,918         | 2,418,336         | 1,905,368        | 2,043,748        |
| 809 propionylcarnitine        | 1,073,437         | 1,039,936         | 1,208,132        | 1,089,995        |
| 1181 pseudouridine            | 8,164             | 9,365             | 5,590            | 8,771            |
| 45 pyroglutamine*             | 178,501           | 201,908           | 184,215          | 189,017          |
| 603 pyrophosphate (PPi)       | 76,524            | 37,001            | 260,564          | 108,258          |

**PATHWAY SORT**

**ORDER      BIOCHEMICAL NAME**

| DARM-00019        | DARM-00020        | DARM-00021       | DARM-00022       |
|-------------------|-------------------|------------------|------------------|
| NHSCI 1866 T2 D21 | NHSCI 1866 T2 D28 | NHSCI 1866 T1    | NHSCI 1866 T1 D7 |
| 997740            | 997720            | 997746           | 997738           |
| 991364            | 991365            | 991366           | 991367           |
| NHSCI 1866 T2 D21 | NHSCI 1866 T2 D28 | NHSCI 1866 T1 D0 | NHSCI 1866 T1 D7 |
| T2 D21            | T2 D28            | T1 D0            | T1 D7            |
| 203.125           | 169.237           | 179.08           | 165.545          |

**PATHWAY SORT**

**ORDER            BIOCHEMICAL NAME**

| T2 D21                           | T2 D28    | T1 D0      | T1 D7     |
|----------------------------------|-----------|------------|-----------|
| 535 pyruvate                     | 1,061,162 | 1,217,532  | 112,132   |
| 1469 ranitidine                  |           |            | 63,634    |
| 548 ribitol                      | 229,530   | 235,520    | 179,868   |
| 557 ribose 5-phosphate           | 134,948   | 98,268     | 303,035   |
| 559 ribulose                     | 19,378    | 36,687     | 24,209    |
| 224 S-adenosylhomocysteine (SAH) | 210,327   | 256,069    | 119,533   |
| 551 sedoheptulose-7-phosphate    | 40,991    | 69,361     | 5,191     |
| 8 serine                         | 8,690,862 | 8,589,556  | 7,383,090 |
| 216 S-methylcysteine             | 130,226   | 89,804     | 69,732    |
| 281 S-methylglutathione          | 31,276    | 20,929     | 24,198    |
| 270 spermidine                   | 1,619,453 | 1,654,982  | 1,261,554 |
| 1584 stachydrine                 | 3,444,752 | 3,618,930  | 3,174,276 |
| 637 stearate (18:0)              | 8,879,079 | 11,802,712 | 5,153,922 |
| 1005 stearoyl sphingomyelin      | 1,134,866 | 1,103,962  | 1,173,464 |
| 834 stearoylcarnitine            | 685,867   | 635,931    | 113,319   |
| 591 succinylcarnitine            | 602,811   | 669,668    | 508,744   |
| 1662 terephthalic acid           | 430,156   | 428,498    | 401,573   |
| 1614 theobromine                 | 197,378   | 237,016    | 160,705   |
| 1615 theophylline                | 133,270   | 118,079    | 74,393    |
| 549 threitol                     | 968,914   | 957,934    | 834,558   |
| 1199 threonate                   | 567,150   | 551,803    | 506,499   |
| 17 threonine                     | 238,672   | 233,172    | 205,602   |
| 252 trans-4-hydroxyproline       | 32,518    | 25,701     | 19,313    |

| DARM-00019        | DARM-00020        | DARM-00021       | DARM-00022       |
|-------------------|-------------------|------------------|------------------|
| NHSCI 1866 T2 D21 | NHSCI 1866 T2 D28 | NHSCI 1866 T1    | NHSCI 1866 T1 D7 |
|                   | 997740            | 997720           | 997746           |
|                   | 991364            | 991365           | 991366           |
| NHSCI 1866 T2 D21 | NHSCI 1866 T2 D28 | NHSCI 1866 T1 D0 | NHSCI 1866 T1 D7 |
| T2 D21            | T2 D28            | T1 D0            | T1 D7            |
|                   | 203.125           | 169.237          | 179.08           |
| T2 D21            | T2 D28            | T1 D0            | T1 D7            |

**PATHWAY SORT**

**ORDER            BIOCHEMICAL NAME**

|                                                      |            |            |            |            |
|------------------------------------------------------|------------|------------|------------|------------|
| 501 trehalose                                        | 1,325,007  | 1,042,991  | 190,060    | 462,741    |
| 1242 trigonelline (N <sup>1</sup> -methylnicotinate) | 501,302    | 462,348    | 484,522    | 505,470    |
| 145 tryptophan                                       | 4,679,503  | 4,174,408  | 3,589,194  | 4,354,362  |
| 151 tryptophan betaine                               | 4,354,753  | 4,427,971  | 3,840,391  | 4,271,965  |
| 99 tyrosine                                          | 3,029,753  | 2,886,537  | 2,522,695  | 2,872,657  |
| 1149 urate                                           | 166,881    | 174,699    | 187,677    | 178,192    |
| 245 urea                                             | 27,915,962 | 27,365,086 | 24,941,684 | 27,766,150 |
| 1180 uridine                                         | 39,013     | 46,772     | 27,367     | 43,315     |
| 190 valine                                           | 10,775,019 | 10,639,117 | 9,167,983  | 10,653,256 |
| 565 xylitol                                          | 19,881     |            |            | 279,174    |
| 570 xylonate                                         | 75,060     | 59,895     | 49,776     | 82,130     |
| 569 xylose                                           |            | 149,690    | 86,756     | 123,024    |

| PATHWAY SORT<br>ORDER | BIOCHEMICAL NAME                                   | DARM-00023        | DARM-00024        | DARM-00025        | DARM-00026         |
|-----------------------|----------------------------------------------------|-------------------|-------------------|-------------------|--------------------|
|                       |                                                    | NHSCI 1866 T1 D14 | NHSCI 1866 T1 D21 | NHSCI 1866 T1 D28 | NHSCI 1866 CONTROL |
|                       |                                                    | 997739            | 997737            | 997732            | 997735             |
|                       |                                                    | 991368            | 991369            | 991370            | 991371             |
|                       |                                                    | NHSCI 1866 T1 D14 | NHSCI 1866 T1 D21 | NHSCI 1866 T1 D28 | NHSCI 1866 C D0    |
|                       |                                                    | T1 D14            | T1 D21            | T1 D28            | C D0               |
|                       |                                                    | 173.574           | 171.422           | 155.949           | 177.522            |
|                       |                                                    | T1 D14            | T1 D21            | T1 D28            | C D0               |
| 905                   | 1,2-propanediol                                    | 9,222,896         | 11,653,529        | 16,395,251        | 5,359,018          |
| 532                   | 1,3-dihydroxyacetone                               | 79,639            | 75,059            | 66,607            | 71,270             |
| 515                   | 1,5-anhydroglucitol (1,5-AG)                       | 6,016,202         | 8,553,883         | 6,683,827         | 7,625,753          |
| 523                   | 1,6-anhydroglucose                                 | 511,979           | 293,938           | 390,658           | 422,889            |
| 636                   | 10-heptadecenoate (17:1n7)                         | 87,318            | 106,381           | 101,766           | 68,349             |
| 742                   | 13-methylmyristic acid                             | 132,142           | 143,027           | 170,341           | 76,519             |
| 744                   | 15-methylpalmitate (isobar with 2-methylpalmitate) | 213,039           | 263,284           | 309,137           | 125,661            |
| 919                   | 1-arachidonoylglycerophosphoethanolamine*          | 20,053            | 20,043            | 19,307            | 35,154             |
| 938                   | 1-linoleoylglycerophosphocholine                   | 244,569           | 246,194           | 237,103           | 247,500            |
| 926                   | 1-myristoylglycerophosphocholine                   | 102,061           | 198,228           | 59,542            |                    |
| 936                   | 1-oleoylglycerophosphocholine                      | 1,587,265         | 3,673,508         | 779,136           | 38,365             |
| 915                   | 1-oleoylglycerophosphoethanolamine                 | 17,824            | 10,839            | 23,412            | 26,206             |
| 970                   | 1-palmitoylglycerol (1-monopalmitin)               | 44,045            | 41,357            | 28,608            | 27,195             |
| 929                   | 1-palmitoylglycerophosphocholine                   | 7,190,304         | 13,289,885        | 4,358,269         | 125,397            |
| 909                   | 1-palmitoylglycerophosphoethanolamine              | 11,739            | 17,475            | 9,695             | 18,804             |
| 934                   | 1-stearoylglycerophosphocholine                    | 2,980,702         | 6,212,239         | 1,742,057         | 48,748             |
| 533                   | 2,3-diphosphoglycerate                             | 333,988           | 130,003           | 25,572            | 314,605            |
| 263                   | 2-aminobutyrate                                    | 2,537,859         | 2,450,284         | 2,724,597         | 2,469,166          |
| 945                   | 2-arachidonoylglycerophosphocholine*               | 404,946           | 742,997           | 153,659           |                    |
| 920                   | 2-arachidonoylglycerophosphoethanolamine*          | 3,413,996         | 5,115,768         | 1,716,124         | 88,717             |
| 923                   | 2-docosahexaenoylglycerophosphoethanolamine*       | 828,081           | 1,285,999         | 352,568           | 41,806             |
| 922                   | 2-docosapentaenoylglycerophosphoethanolamine*      | 919,153           | 1,583,575         | 432,783           |                    |
| 1360                  | 2-ethylhexanoate (isobar with 2-propylpentanoate)  | 19,731            | 22,683            | 18,451            | 30,919             |
| 229                   | 2-hydroxybutyrate (AHB)                            | 1,690,633         | 1,630,246         | 1,556,682         | 1,588,466          |
| 714                   | 2-hydroxyglutarate                                 | 296,627           | 318,966           | 354,627           | 105,231            |
| 706                   | 2-hydroxypalmitate                                 | 47,416            | 56,921            | 57,935            | 36,965             |
| 939                   | 2-linoleoylglycerophosphocholine*                  | 676,049           | 1,129,196         | 409,232           |                    |



| DARM-00023        | DARM-00024        | DARM-00025        | DARM-00026         |
|-------------------|-------------------|-------------------|--------------------|
| NHSCI 1866 T1 D14 | NHSCI 1866 T1 D21 | NHSCI 1866 T1 D28 | NHSCI 1866 CONTROL |
| 997739            | 997737            | 997732            | 997735             |
| 991368            | 991369            | 991370            | 991371             |
| NHSCI 1866 T1 D14 | NHSCI 1866 T1 D21 | NHSCI 1866 T1 D28 | NHSCI 1866 C D0    |
| T1 D14            | T1 D21            | T1 D28            | C D0               |
| 173.574           | 171.422           | 155.949           | 177.522            |

**PATHWAY SORT**

| ORDER | BIOCHEMICAL NAME                   | T1 D14     | T1 D21     | T1 D28     | C D0       |
|-------|------------------------------------|------------|------------|------------|------------|
| 202   | 2-methylbutyrylcarnitine           | 40,669     | 47,016     | 51,127     | 74,990     |
| 937   | 2-oleoylglycerophosphocholine*     | 337,856    | 708,052    | 164,772    |            |
| 930   | 2-palmitoylglycerophosphocholine*  | 639,670    | 1,237,807  | 330,006    | 34,141     |
| 935   | 2-stearoylglycerophosphocholine*   | 164,754    | 385,602    | 113,450    |            |
| 821   | 3-dehydrocarnitine*                | 1,019,193  | 932,404    | 1,018,342  | 940,934    |
| 170   | 3-indoxyl sulfate                  | 3,053      | 4,915      | 3,975      | 4,098      |
| 172   | 3-methyl-2-oxobutyrate             | 6,240      | 8,786      |            | 56,751     |
| 173   | 3-methyl-2-oxovalerate             | 17,025     | 16,565     | 22,984     | 53,631     |
| 529   | 3-phosphoglycerate                 | 1,478,279  | 598,853    | 542,490    | 1,123,098  |
| 193   | 4-methyl-2-oxopentanoate           | 24,801     | 30,725     | 41,940     | 113,635    |
| 266   | 5-methylthioadenosine (MTA)        | 140,884    | 117,209    | 109,639    | 47,611     |
| 282   | 5-oxoproline                       | 350,384    | 385,959    | 418,018    | 55,881     |
| 545   | 6-phosphogluconate                 | 80,351     | 33,268     | 31,567     | 115,280    |
| 1024  | 7-beta-hydroxycholesterol          | 28,826     | 19,054     | 22,345     | 19,557     |
| 712.5 | 9,10-epoxyoctadec-12(Z)-enoic acid | 152,463    | 157,052    | 213,245    | 13,769     |
| 672   | 9,10-epoxystearate                 | 8,368,615  | 8,289,198  | 11,156,853 | 400,963    |
| 822   | acetylcarnitine                    | 3,473,271  | 3,330,010  | 3,275,070  | 4,034,797  |
| 601   | acetylphosphate                    | 3,284,806  | 3,234,368  | 3,255,410  | 2,935,023  |
| 1105  | adenine                            | 33,155,058 | 25,601,084 | 16,469,920 | 42,802,920 |
| 1106  | adenosine                          | 35,262     | 30,706     | 31,773     | 37,023     |
| 1116  | adenosine 5'-diphosphate (ADP)     | 134,937    | 95,612     | 94,216     | 218,446    |
| 1232  | adenosine 5'diphosphoribose        | 102,409    | 82,110     | 68,008     | 94,292     |
| 1114  | adenosine 5'-monophosphate (AMP)   | 2,832,129  | 3,536,550  | 5,477,438  | 3,445,505  |
| 665   | adrenate (22:4n6)                  | 68,604     | 106,317    | 109,502    | 35,631     |

| PATHWAY SORT<br>ORDER | BIOCHEMICAL NAME             | DARM-00023        | DARM-00024        | DARM-00025        | DARM-00026         |
|-----------------------|------------------------------|-------------------|-------------------|-------------------|--------------------|
|                       |                              | NHSCI 1866 T1 D14 | NHSCI 1866 T1 D21 | NHSCI 1866 T1 D28 | NHSCI 1866 CONTROL |
|                       |                              | 997739            | 997737            | 997732            | 997735             |
|                       |                              | 991368            | 991369            | 991370            | 991371             |
|                       |                              | NHSCI 1866 T1 D14 | NHSCI 1866 T1 D21 | NHSCI 1866 T1 D28 | NHSCI 1866 C D0    |
|                       |                              | T1 D14            | T1 D21            | T1 D28            | C D0               |
|                       |                              | 173.574           | 171.422           | 155.949           | 177.522            |
|                       |                              | T1 D14            | T1 D21            | T1 D28            | C D0               |
|                       | 27 alanine                   | 50,100,840        | 51,392,724        | 60,260,428        | 56,876,548         |
|                       | 1150 allantoin               | 9,816             | 25,160            | 28,017            | 46,315             |
|                       | 179 alpha-hydroxyisocaproate | 429,098           | 315,064           | 410,059           |                    |
|                       | 198 alpha-hydroxyisovalerate | 1,381,199         | 1,310,523         | 1,658,694         | 288,261            |
|                       | 1266 alpha-tocopherol        | 121,546           | 109,708           | 171,439           | 174,305            |
|                       | 1034 androsterone sulfate    | 4,983             | 6,402             | 7,721             | 5,431              |
|                       | 566 arabinose                | 296,164           | 346,448           | 386,519           | 297,138            |
|                       | 546 arabitol                 | 866,851           | 800,143           | 957,866           | 585,899            |
|                       | 1202 arabonate               | 80,462            | 73,555            | 76,541            | 67,569             |
|                       | 659 arachidonate (20:4n6)    | 697,589           | 1,008,060         | 1,476,199         | 695,282            |
|                       | 241 arginine                 | 988,248           | 1,240,274         | 1,372,072         | 530,412            |
|                       | 25 asparagine                | 1,323,333         | 1,203,043         | 1,392,988         | 1,406,645          |
|                       | 24 aspartate                 | 4,816,711         | 4,305,496         | 3,695,279         | 3,381,338          |
|                       | 721 azelate (nonanedioate)   | 24,727            | 32,976            | 48,723            | 4,398              |
|                       | 26 beta-alanine              | 147,916           | 116,475           | 167,238           | 151,480            |
|                       | 7 beta-hydroxypyruvate       | 260,419           | 192,934           | 265,273           | 303,406            |
|                       | 22 betaine                   | 1,720,901         | 1,677,453         | 1,717,075         | 1,639,042          |
|                       | 1057 beta-sitosterol         | 57,786            | 49,832            | 45,102            | 30,940             |
|                       | 1216 biliverdin              | 73,846            | 121,908           | 32,588            | 19,615             |

| DARM-00023        | DARM-00024        | DARM-00025        | DARM-00026         |
|-------------------|-------------------|-------------------|--------------------|
| NHSCI 1866 T1 D14 | NHSCI 1866 T1 D21 | NHSCI 1866 T1 D28 | NHSCI 1866 CONTROL |
| 997739            | 997737            | 997732            | 997735             |
| 991368            | 991369            | 991370            | 991371             |
| NHSCI 1866 T1 D14 | NHSCI 1866 T1 D21 | NHSCI 1866 T1 D28 | NHSCI 1866 C D0    |
| T1 D14            | T1 D21            | T1 D28            | C D0               |
| 173.574           | 171.422           | 155.949           | 177.522            |

**PATHWAY SORT**

| ORDER | BIOCHEMICAL NAME                   | T1 D14      | T1 D21      | T1 D28      | C D0        |
|-------|------------------------------------|-------------|-------------|-------------|-------------|
| 811   | butyrylcarnitine                   | 9,986       | 25,941      | 12,620      | 16,262      |
| 1612  | caffeine                           | 3,204,983   | 3,235,623   | 3,163,755   | 3,387,228   |
| 1059  | campesterol                        | 207,988     | 410,371     | 375,275     | 240,252     |
| 622   | caprate (10:0)                     | 27,899      | 19,115      | 25,526      | 15,349      |
| 618   | caproate (6:0)                     | 21,964      | 22,321      | 20,907      | 43,003      |
| 620   | caprylate (8:0)                    | 19,582      | 37,463      | 24,080      | 27,589      |
| 820   | carnitine                          | 1,068,483   | 1,025,964   | 1,009,222   | 938,032     |
| 1300  | catechol sulfate                   | 77,652      | 76,520      | 75,564      | 79,676      |
| 164   | C-glycosyltryptophan*              | 31,863      | 33,420      | 27,721      | 31,840      |
| 1020  | cholesterol                        | 34,291,188  | 32,623,754  | 36,720,168  | 35,122,852  |
| 881   | choline                            | 2,249,203   | 2,107,602   | 2,141,094   | 2,123,580   |
| 582   | cis-aconitate                      | 914,380     | 926,615     | 922,791     | 622,362     |
| 641   | cis-vaccenate (18:1n7)             | 105,201     | 216,159     | 363,117     | 227,686     |
| 579   | citrate                            | 198,625,488 | 145,882,720 | 120,670,864 | 295,909,920 |
| 248   | citrulline                         | 114,735     | 112,684     | 119,573     | 100,053     |
| 259   | creatine                           | 3,761,597   | 3,710,686   | 3,729,844   | 3,638,218   |
| 260   | creatinine                         | 434,766     | 401,605     | 448,956     | 412,470     |
| 213   | cysteine                           | 649,481     | 956,357     | 1,064,491   | 468,283     |
| 819   | deoxycarnitine                     | 583,392     | 556,648     | 589,514     | 569,406     |
| 655   | dihomo-linoleate (20:2n6)          | 75,468      | 80,418      | 93,527      | 45,828      |
| 609   | dihomo-linolenate (20:3n3 or n6)   | 71,432      | 88,102      | 117,655     | 69,155      |
| 531   | dihydroxyacetone phosphate (DHAP)  | 711,366     |             |             | 33,072      |
| 3     | dimethylglycine                    | 296,146     | 181,282     | 349,965     | 364,534     |
| 613   | docosahexaenoate (DHA; 22:6n3)     | 146,753     | 184,351     | 231,315     | 118,229     |
| 611   | docosapentaenoate (n3 DPA; 22:5n3) | 82,788      | 103,119     | 131,731     | 49,019      |
| 610   | eicosapentaenoate (EPA; 20:5n3)    | 178,067     | 200,501     | 213,780     | 156,298     |
| 1565  | ergothioneine                      | 787,115     | 784,154     | 822,103     | 898,558     |
| 735   | erucamide                          | 260,022     | 265,707     |             | 570,717     |
| 1632  | erythritol                         | 2,037,034   | 2,614,540   | 3,672,486   | 837,725     |
| 453   | erythronate*                       | 955,566     | 1,345,808   | 1,403,580   | 389,326     |

|              |                                | DARM-00023        | DARM-00024        | DARM-00025        | DARM-00026         |
|--------------|--------------------------------|-------------------|-------------------|-------------------|--------------------|
|              |                                | NHSCI 1866 T1 D14 | NHSCI 1866 T1 D21 | NHSCI 1866 T1 D28 | NHSCI 1866 CONTROL |
|              |                                | 997739            | 997737            | 997732            | 997735             |
|              |                                | 991368            | 991369            | 991370            | 991371             |
| PATHWAY SORT |                                | NHSCI 1866 T1 D14 | NHSCI 1866 T1 D21 | NHSCI 1866 T1 D28 | NHSCI 1866 C D0    |
| ORDER        | BIOCHEMICAL NAME               | T1 D14            | T1 D21            | T1 D28            | C D0               |
| 876          | ethanolamine                   | 173,574           | 171,422           | 155,949           | 177,522            |
|              |                                | T1 D14            | T1 D21            | T1 D28            | C D0               |
|              |                                | 616,450           | 513,979           | 740,718           | 449,686            |
| 472          | fructose                       | 48,251,748        | 73,835,424        | 99,218,608        | 62,642,476         |
| 524          | fructose-6-phosphate           | 601,632           | 269,948           | 398,915           | 553,908            |
| 594          | fumarate                       | 617,688           | 639,637           | 604,120           | 415,915            |
| 404          | gamma-glutamylleucine          | 26,263            | 27,469            |                   | 24,169             |
| 521          | glucose                        | 947,113,472       | 896,353,088       | 993,111,232       | 1,118,494,208      |
| 519          | glucose-6-phosphate (G6P)      | 1,117,890         | 1,420,377         | 1,316,496         | 1,412,532          |
| 39           | glutamate                      | 6,378,748         | 5,257,395         | 6,198,704         | 6,831,711          |
| 44           | glutamine                      | 1,097,059         | 959,056           | 880,151           | 1,941,536          |
| 80           | glutaroyl carnitine            | 12,938            | 13,182            | 11,913            | 17,870             |
| 283          | glutathione, oxidized (GSSG)   | 986,813           | 779,092           | 691,372           | 1,474,703          |
| 280          | glutathione, reduced (GSH)     | 22,980,926        | 21,671,654        | 19,504,774        | 26,064,682         |
| 517          | glycerate                      | 4,681,174         | 5,326,287         | 6,292,381         | 249,083            |
| 882          | glycerol 3-phosphate (G3P)     | 564,928           | 252,624           | 273,805           | 395,807            |
| 883          | glycerophosphorylcholine (GPC) | 160,595           | 156,805           | 166,682           | 171,745            |
| 1            | glycine                        | 34,244,468        | 39,616,372        | 53,382,244        | 27,236,388         |
| 851          | glycochenodeoxycholate         | 99,498            | 89,799            | 94,180            | 120,061            |
| 840          | glycocholate                   | 50,337            | 48,685            | 56,512            | 58,620             |
| 849          | glycodeoxycholate              | 44,255            | 34,620            | 41,816            | 32,563             |
| 1318         | glycolate (hydroxyacetate)     | 371,105           | 340,540           | 409,050           | 393,353            |
| 1128         | guanosine                      | 32,032            | 32,000            | 19,652            | 25,082             |
| 1212         | heme*                          | 5,497,433         | 10,833,596        | 1,124,794         | 187,384            |
| 619          | heptanoate (7:0)               | 6,033             | 7,009             | 7,562             | 9,017              |
| 823          | hexanoylcarnitine              | 25,003            | 30,915            | 26,561            | 61,494             |
| 1288         | hippurate                      | 52,463            | 50,955            | 50,157            | 48,853             |
| 50           | histidine                      | 41,985            | 54,803            | 44,890            | 37,045             |

| PATHWAY SORT<br>ORDER | BIOCHEMICAL NAME                                                        | DARM-00023        | DARM-00024        | DARM-00025        | DARM-00026         |
|-----------------------|-------------------------------------------------------------------------|-------------------|-------------------|-------------------|--------------------|
|                       |                                                                         | NHSCI 1866 T1 D14 | NHSCI 1866 T1 D21 | NHSCI 1866 T1 D28 | NHSCI 1866 CONTROL |
|                       |                                                                         | 997739            | 997737            | 997732            | 997735             |
|                       |                                                                         | 991368            | 991369            | 991370            | 991371             |
|                       |                                                                         | NHSCI 1866 T1 D14 | NHSCI 1866 T1 D21 | NHSCI 1866 T1 D28 | NHSCI 1866 C D0    |
|                       |                                                                         | T1 D14            | T1 D21            | T1 D28            | C D0               |
|                       |                                                                         | 173.574           | 171.422           | 155.949           | 177.522            |
|                       |                                                                         | T1 D14            | T1 D21            | T1 D28            | C D0               |
|                       | 231 homocysteine                                                        | 102,438           | 92,077            | 125,847           | 25,998             |
|                       | 1585 homostachydrine*                                                   | 31,065            | 34,000            | 36,082            | 41,178             |
|                       | 206 hydroxyisovaleroyl carnitine                                        | 348,729           | 335,775           | 343,590           | 361,571            |
|                       | 1098 hypoxanthine                                                       | 13,937,754        | 12,358,769        | 14,866,583        | 279,881            |
|                       | 1101 inosine 5'-monophosphate (IMP)                                     | 405,409           | 605,083           | 679,813           | 134,957            |
|                       | Isobar: fructose 1,6-diphosphate, glucose 1,6-diphosphate, myo-inositol |                   |                   |                   |                    |
|                       | 527 1,4 or 1,3-diphosphate                                              | 79,205            | 30,139            | 25,676            | 53,309             |
|                       | 561 Isobar: ribulose 5-phosphate, xylulose 5-phosphate                  | 261,361           | 42,323            | 43,696            | 81,386             |
|                       | 496 Isobar: sorbitol, mannitol                                          | 20,631,362        | 19,962,346        | 16,509,542        | 17,943,808         |
|                       | 200 isobutyrylcarnitine                                                 | 135,366           | 132,992           | 130,810           | 143,152            |
|                       | 180 isoleucine                                                          | 5,791,709         | 5,323,534         | 5,687,231         | 4,385,777          |
|                       | 478 isomaltose                                                          | 1,489,502         | 1,627,792         | 2,074,130         | 1,946,129          |
|                       | 205 isovalerylcarnitine                                                 | 98,113            | 90,526            | 96,377            | 107,873            |
|                       | 144 kynurenine                                                          | 147,800           | 127,429           | 112,213           | 138,889            |
|                       | 536 lactate                                                             | 1,643,635,584     | 1,936,001,408     | 2,385,103,360     | 283,727,616        |
|                       | 1018 lathosterol                                                        | 46,234            | 52,225            |                   |                    |
|                       | 625 laurate (12:0)                                                      | 139,308           | 110,852           | 109,737           | 108,254            |
|                       | 181 leucine                                                             | 11,146,261        | 10,841,503        | 11,718,432        | 9,206,251          |

|              | DARM-00023                                     | DARM-00024        | DARM-00025        | DARM-00026         |            |
|--------------|------------------------------------------------|-------------------|-------------------|--------------------|------------|
|              | NHSCI 1866 T1 D14                              | NHSCI 1866 T1 D21 | NHSCI 1866 T1 D28 | NHSCI 1866 CONTROL |            |
|              | 997739                                         | 997737            | 997732            | 997735             |            |
|              | 991368                                         | 991369            | 991370            | 991371             |            |
|              | NHSCI 1866 T1 D14                              | NHSCI 1866 T1 D21 | NHSCI 1866 T1 D28 | NHSCI 1866 C D0    |            |
|              | T1 D14                                         | T1 D21            | T1 D28            | C D0               |            |
|              | 173.574                                        | 171.422           | 155.949           | 177.522            |            |
| PATHWAY SORT | T1 D14                                         | T1 D21            | T1 D28            | C D0               |            |
| ORDER        | BIOCHEMICAL NAME                               |                   |                   |                    |            |
|              | 604 linoleate (18:2n6)                         | 3,454,248         | 4,061,245         | 4,524,522          | 2,696,804  |
|              | 608 linolenate [alpha or gamma; (18:3n3 or 6)] | 562,984           | 707,330           | 698,064            | 570,880    |
|              | 69 lysine                                      | 2,899,100         | 2,479,688         | 3,217,801          | 2,485,539  |
|              | 598 malate                                     | 2,705,658         | 2,812,607         | 2,370,052          | 1,111,300  |
|              | 482 maltose                                    | 1,068,441         | 1,122,334         | 1,304,029          | 1,355,155  |
|              | 487 mannose                                    | 11,294,361        | 11,001,329        | 11,860,068         | 14,083,007 |
|              | 489 mannose-6-phosphate                        | 276,375           | 240,282           | 255,265            | 219,228    |
|              | 635 margarate (17:0)                           | 399,697           | 472,678           | 520,903            | 294,869    |
|              | 658 mead acid (20:3n9)                         | 16,461            | 14,273            | 18,625             | 20,403     |
|              | 225 methionine                                 | 641,689           | 481,944           | 453,751            | 881,990    |
|              | 890 myo-inositol                               | 1,999,987         | 1,791,128         | 2,181,631          | 2,326,825  |
|              | 629 myristate (14:0)                           | 671,065           | 690,413           | 788,174            | 401,086    |
|              | 630 myristoleate (14:1n5)                      | 37,469            |                   |                    | 48,279     |
| 1242.1       | N1-Methyl-2-pyridone-5-carboxamide             | 104,601           | 139,784           | 161,098            | 112,680    |
| 75           | N-6-trimethyllysine                            | 164,703           | 182,702           | 171,199            | 180,387    |
| 4            | N-acetylglycine                                | 69,833            |                   | 85,540             | 80,848     |
| 227          | N-acetylmethionine                             | 3,741             | 5,469             | 5,033              | 5,502      |
| 455          | N-acetylneuraminate                            | 60,076            | 115,440           | 144,073            | 30,853     |
| 1221         | nicotinamide                                   | 2,466,889         | 2,901,258         | 2,575,339          | 2,649,055  |
| 1224         | nicotinamide adenine dinucleotide (NAD+)       | 3,127             | 2,604             | 2,771              | 3,624      |
| 825          | octanoylcarnitine                              | 76,524            | 85,048            | 64,582             | 74,458     |
| 639          | oleate (18:1n9)                                | 873,971           | 917,018           | 996,987            | 597,759    |
| 835          | oleoylcarnitine                                | 3,057,726         | 7,241,210         | 1,733,185          | 39,832     |

|                               | DARM-00023        | DARM-00024        | DARM-00025        | DARM-00026         |
|-------------------------------|-------------------|-------------------|-------------------|--------------------|
|                               | NHSCI 1866 T1 D14 | NHSCI 1866 T1 D21 | NHSCI 1866 T1 D28 | NHSCI 1866 CONTROL |
|                               | 997739            | 997737            | 997732            | 997735             |
|                               | 991368            | 991369            | 991370            | 991371             |
|                               | NHSCI 1866 T1 D14 | NHSCI 1866 T1 D21 | NHSCI 1866 T1 D28 | NHSCI 1866 C D0    |
| T1 D14                        | T1 D21            | T1 D28            | C D0              |                    |
|                               | 173.574           | 171.422           | 155.949           | 177.522            |
| T1 D14                        | T1 D21            | T1 D28            | C D0              |                    |
|                               | 52,223            | 23,753            |                   | 204,163            |
| 244 ornithine                 | 12,768,683        | 10,862,977        | 12,987,170        | 11,518,017         |
| 632 palmitate (16:0)          | 7,773,711         | 8,460,192         | 9,093,167         | 6,094,743          |
| 633 palmitoleate (16:1n7)     | 594,583           | 511,705           | 554,747           | 472,426            |
| 1004 palmitoyl sphingomyelin  | 15,122,169        | 13,045,416        | 15,386,679        | 15,587,769         |
| 833 palmitoylcarnitine        | 1,413,824         | 3,149,368         | 859,247           |                    |
| 1243 pantothenate             | 103,143           | 88,135            | 94,692            | 91,492             |
| 1613 paraxanthine             | 501,549           | 447,541           | 491,750           | 489,402            |
| 88 p-cresol sulfate           | 39,727            | 40,431            | 41,708            | 46,335             |
| 621 pelargonate (9:0)         | 191,865           | 173,659           | 218,977           | 107,227            |
| 631 pentadecanoate (15:0)     | 214,252           | 261,516           | 282,267           | 161,375            |
| 135 phenol sulfate            | 18,658            | 17,398            | 19,028            | 20,850             |
| 128 phenylacetylglutamine     | 39,670            | 43,365            | 36,500            | 36,932             |
| 83 phenylalanine              | 9,345,391         | 8,765,870         | 9,414,596         | 7,616,771          |
| 602 phosphate                 | 675,251,968       | 845,790,656       | 1,104,383,744     | 1,071,254,272      |
| 534 phosphoenolpyruvate (PEP) | 209,038           | 70,826            | 27,817            | 263,933            |
| 877 phosphoethanolamine       | 89,288            | 67,771            | 50,592            |                    |
| 74 pipecolate                 | 97,968            | 103,222           | 91,430            | 92,603             |
| 1531 piperine                 | 119,521           | 138,843           | 81,002            | 126,860            |
| 246 proline                   | 2,112,336         | 2,086,547         | 2,257,323         | 2,024,499          |
| 809 propionylcarnitine        | 933,796           | 841,561           | 812,781           | 1,267,591          |
| 1181 pseudouridine            | 10,952            | 7,553             | 9,629             | 10,650             |
| 45 pyroglutamine*             | 204,814           | 172,022           | 163,727           | 146,838            |
| 603 pyrophosphate (PPi)       | 95,057            | 58,494            | 61,654            | 114,575            |

**PATHWAY SORT**

**ORDER BIOCHEMICAL NAME**

|              | DARM-00023                   | DARM-00024        | DARM-00025        | DARM-00026         |           |
|--------------|------------------------------|-------------------|-------------------|--------------------|-----------|
|              | NHSCI 1866 T1 D14            | NHSCI 1866 T1 D21 | NHSCI 1866 T1 D28 | NHSCI 1866 CONTROL |           |
|              | 997739                       | 997737            | 997732            | 997735             |           |
|              | 991368                       | 991369            | 991370            | 991371             |           |
|              | NHSCI 1866 T1 D14            | NHSCI 1866 T1 D21 | NHSCI 1866 T1 D28 | NHSCI 1866 C D0    |           |
|              | T1 D14                       | T1 D21            | T1 D28            | C D0               |           |
|              | 173.574                      | 171.422           | 155.949           | 177.522            |           |
| PATHWAY SORT | T1 D14                       | T1 D21            | T1 D28            | C D0               |           |
| ORDER        | BIOCHEMICAL NAME             |                   |                   |                    |           |
| 535          | pyruvate                     | 181,161           | 3,408,564         | 7,034,338          | 3,892,667 |
| 1469         | ranitidine                   |                   |                   |                    |           |
| 548          | ribitol                      | 1,410,089         | 1,256,211         | 1,640,570          | 170,112   |
| 557          | ribose 5-phosphate           | 242,187           | 85,959            | 71,897             | 101,950   |
| 559          | ribulose                     | 111,852           | 32,986            | 54,531             |           |
| 224          | S-adenosylhomocysteine (SAH) | 229,461           | 169,683           | 232,285            | 134,742   |
| 551          | sedoheptulose-7-phosphate    |                   | 34,028            | 86,705             | 52,333    |
| 8            | serine                       | 8,534,447         | 8,305,055         | 9,531,856          | 7,174,827 |
| 216          | S-methylcysteine             | 58,931            | 71,970            | 82,448             | 58,170    |
| 281          | S-methylglutathione          | 44,493            | 28,444            | 21,097             | 25,339    |
| 270          | spermidine                   | 1,420,840         | 1,392,796         | 1,501,036          | 1,423,610 |
| 1584         | stachydrine                  | 3,378,943         | 3,452,362         | 3,444,646          | 3,534,442 |
| 637          | stearate (18:0)              | 7,597,692         | 8,274,300         | 9,011,432          | 5,454,827 |
| 1005         | stearoyl sphingomyelin       | 1,127,528         | 1,100,591         | 1,194,281          | 1,087,408 |
| 834          | stearoylcarnitine            | 993,279           | 2,405,598         | 560,078            |           |
| 591          | succinylcarnitine            | 598,940           | 620,805           | 693,106            | 531,937   |
| 1662         | terephthalic acid            | 353,476           | 376,418           | 333,558            | 425,030   |
| 1614         | theobromine                  | 159,734           | 187,818           | 233,955            | 166,447   |
| 1615         | theophylline                 | 90,363            | 47,447            | 112,746            | 144,988   |
| 549          | threitol                     | 1,163,937         | 1,112,152         | 1,222,698          | 659,998   |
| 1199         | threonate                    | 542,629           | 553,646           | 619,076            | 503,317   |
| 17           | threonine                    | 234,652           | 220,304           | 262,908            | 187,534   |
| 252          | trans-4-hydroxyproline       | 30,124            | 24,840            | 22,725             | 22,861    |



| PATHWAY SORT<br>ORDER | BIOCHEMICAL NAME                                     | DARM-00023        | DARM-00024        | DARM-00025        | DARM-00026         |
|-----------------------|------------------------------------------------------|-------------------|-------------------|-------------------|--------------------|
|                       |                                                      | NHSCI 1866 T1 D14 | NHSCI 1866 T1 D21 | NHSCI 1866 T1 D28 | NHSCI 1866 CONTROL |
|                       |                                                      | 997739            | 997737            | 997732            | 997735             |
|                       |                                                      | 991368            | 991369            | 991370            | 991371             |
|                       |                                                      | NHSCI 1866 T1 D14 | NHSCI 1866 T1 D21 | NHSCI 1866 T1 D28 | NHSCI 1866 C D0    |
|                       |                                                      | T1 D14            | T1 D21            | T1 D28            | C D0               |
|                       |                                                      | 173.574           | 171.422           | 155.949           | 177.522            |
|                       |                                                      | T1 D14            | T1 D21            | T1 D28            | C D0               |
|                       | 501 trehalose                                        | 630,175           | 939,834           | 1,063,138         | 159,979            |
|                       | 1242 trigonelline (N <sup>1</sup> -methylnicotinate) | 495,616           | 479,519           | 479,042           | 508,849            |
|                       | 145 tryptophan                                       | 4,375,374         | 4,166,448         | 4,322,376         | 4,000,641          |
|                       | 151 tryptophan betaine                               | 4,143,583         | 4,125,602         | 4,432,113         | 4,396,314          |
|                       | 99 tyrosine                                          | 2,919,663         | 2,787,029         | 2,726,773         | 2,677,883          |
|                       | 1149 urate                                           | 147,324           | 149,184           | 138,873           | 206,944            |
|                       | 245 urea                                             | 24,829,290        | 24,798,716        | 28,481,742        | 27,163,684         |
|                       | 1180 uridine                                         | 40,633            | 36,538            | 42,784            | 25,665             |
|                       | 190 valine                                           | 10,208,828        | 10,230,705        | 10,366,040        | 9,614,625          |
|                       | 565 xylitol                                          | 290,929           | 161,397           | 92,652            |                    |
|                       | 570 xylonate                                         | 93,594            | 107,315           | 66,169            | 56,895             |
|                       | 569 xylose                                           | 310,196           | 365,001           | 468,016           | 137,822            |

| DARM-00027      | DARM-00028       | DARM-00029       | DARM-00030       |
|-----------------|------------------|------------------|------------------|
| NHSCI 1866 C D7 | NHSCI 1866 C D14 | NHSCI 1866 C D21 | NHSCI 1866 C D51 |
| 997723          | 997728           | 997722           | 997744           |
| 991372          | 991373           | 991374           | 991375           |
| NHSCI 1866 C D7 | NHSCI 1866 C D14 | NHSCI 1866 C D21 | NHSCI 1866 C D28 |
| C D7            | C D14            | C D21            | C D28            |
| 181.946         | 180.175          | 185.286          | 186.197          |

**PATHWAY SORT**

**ORDER                      BIOCHEMICAL NAME**

| C D7      | C D14      | C D21      | C D28      |
|-----------|------------|------------|------------|
| 7,541,707 | 11,474,456 | 10,838,376 | 13,819,999 |
| 62,248    | 81,743     | 59,754     | 91,977     |
| 5,766,874 | 6,650,703  | 6,459,022  | 6,144,440  |
| 297,838   | 302,773    | 259,616    | 338,037    |
| 88,236    | 87,893     | 108,649    | 80,277     |
| 132,301   | 146,198    | 137,503    | 130,180    |
| 225,093   | 224,138    | 335,268    | 247,699    |
| 34,056    | 27,537     | 29,738     | 22,073     |
| 324,502   | 263,673    | 323,220    | 217,008    |
| 30,883    | 67,891     | 51,273     | 248,555    |
| 147,482   | 464,838    | 754,374    | 2,874,057  |
| 21,281    | 15,809     | 25,668     | 16,655     |
| 33,967    | 52,041     | 40,849     | 48,834     |
| 934,112   | 2,595,194  | 4,493,467  | 10,554,460 |
| 19,991    | 20,085     | 15,198     | 12,864     |
| 333,108   | 990,782    | 1,407,856  | 6,352,232  |
| 114,587   | 21,834     | 4,300      | 4,070      |
| 2,332,484 | 2,724,088  | 2,244,825  | 2,475,433  |
| 54,086    | 117,454    | 158,278    | 724,160    |
| 420,211   | 1,181,052  | 1,627,422  | 4,628,157  |
| 166,924   | 357,590    | 337,392    | 1,231,888  |
| 128,120   | 386,344    | 441,543    | 1,306,412  |
| 37,268    | 35,103     | 20,464     | 21,554     |
| 1,598,860 | 1,717,726  | 1,384,226  | 1,725,043  |
| 97,025    | 148,145    | 169,055    | 237,560    |
| 51,366    | 43,684     | 57,502     | 41,992     |
| 206,348   | 268,697    | 400,028    | 1,322,133  |

|                                                        |           |            |            |            |
|--------------------------------------------------------|-----------|------------|------------|------------|
| 905 1,2-propanediol                                    | 7,541,707 | 11,474,456 | 10,838,376 | 13,819,999 |
| 532 1,3-dihydroxyacetone                               | 62,248    | 81,743     | 59,754     | 91,977     |
| 515 1,5-anhydroglucitol (1,5-AG)                       | 5,766,874 | 6,650,703  | 6,459,022  | 6,144,440  |
| 523 1,6-anhydroglucose                                 | 297,838   | 302,773    | 259,616    | 338,037    |
| 636 10-heptadecenoate (17:1n7)                         | 88,236    | 87,893     | 108,649    | 80,277     |
| 742 13-methylmyristic acid                             | 132,301   | 146,198    | 137,503    | 130,180    |
| 744 15-methylpalmitate (isobar with 2-methylpalmitate) | 225,093   | 224,138    | 335,268    | 247,699    |
| 919 1-arachidonoylglycerophosphoethanolamine*          | 34,056    | 27,537     | 29,738     | 22,073     |
| 938 1-linoleoylglycerophosphocholine                   | 324,502   | 263,673    | 323,220    | 217,008    |
| 926 1-myristoylglycerophosphocholine                   | 30,883    | 67,891     | 51,273     | 248,555    |
| 936 1-oleoylglycerophosphocholine                      | 147,482   | 464,838    | 754,374    | 2,874,057  |
| 915 1-oleoylglycerophosphoethanolamine                 | 21,281    | 15,809     | 25,668     | 16,655     |
| 970 1-palmitoylglycerol (1-monopalmitin)               | 33,967    | 52,041     | 40,849     | 48,834     |
| 929 1-palmitoylglycerophosphocholine                   | 934,112   | 2,595,194  | 4,493,467  | 10,554,460 |
| 909 1-palmitoylglycerophosphoethanolamine              | 19,991    | 20,085     | 15,198     | 12,864     |
| 934 1-stearoylglycerophosphocholine                    | 333,108   | 990,782    | 1,407,856  | 6,352,232  |
| 533 2,3-diphosphoglycerate                             | 114,587   | 21,834     | 4,300      | 4,070      |
| 263 2-aminobutyrate                                    | 2,332,484 | 2,724,088  | 2,244,825  | 2,475,433  |
| 945 2-arachidonoylglycerophosphocholine*               | 54,086    | 117,454    | 158,278    | 724,160    |
| 920 2-arachidonoylglycerophosphoethanolamine*          | 420,211   | 1,181,052  | 1,627,422  | 4,628,157  |
| 923 2-docosahexaenoylglycerophosphoethanolamine*       | 166,924   | 357,590    | 337,392    | 1,231,888  |
| 922 2-docosapentaenoylglycerophosphoethanolamine*      | 128,120   | 386,344    | 441,543    | 1,306,412  |
| 1360 2-ethylhexanoate (isobar with 2-propylpentanoate) | 37,268    | 35,103     | 20,464     | 21,554     |
| 229 2-hydroxybutyrate (AHB)                            | 1,598,860 | 1,717,726  | 1,384,226  | 1,725,043  |
| 714 2-hydroxyglutarate                                 | 97,025    | 148,145    | 169,055    | 237,560    |
| 706 2-hydroxypalmitate                                 | 51,366    | 43,684     | 57,502     | 41,992     |
| 939 2-linoleoylglycerophosphocholine*                  | 206,348   | 268,697    | 400,028    | 1,322,133  |

| DARM-00027      | DARM-00028       | DARM-00029       | DARM-00030       |
|-----------------|------------------|------------------|------------------|
| NHSCI 1866 C D7 | NHSCI 1866 C D14 | NHSCI 1866 C D21 | NHSCI 1866 C D51 |
| 997723          | 997728           | 997722           | 997744           |
| 991372          | 991373           | 991374           | 991375           |
| NHSCI 1866 C D7 | NHSCI 1866 C D14 | NHSCI 1866 C D21 | NHSCI 1866 C D28 |
| C D7            | C D14            | C D21            | C D28            |
| 181.946         | 180.175          | 185.286          | 186.197          |

**PATHWAY SORT**

**ORDER**

**BIOCHEMICAL NAME**

| C D7       | C D14      | C D21      | C D28      |
|------------|------------|------------|------------|
| 76,855     | 61,196     | 87,420     | 43,965     |
| 66,600     | 128,114    | 161,528    | 651,263    |
| 111,258    | 257,942    | 316,727    | 1,425,490  |
|            | 61,539     | 72,930     | 470,915    |
| 1,067,343  | 1,042,639  | 1,044,675  | 1,045,926  |
| 4,277      | 3,665      | 2,759      | 5,125      |
| 53,364     | 51,377     | 38,252     | 34,658     |
| 55,305     | 63,694     | 59,705     | 51,366     |
| 862,740    | 781,792    | 434,652    | 392,112    |
| 118,641    | 128,891    | 99,049     | 85,243     |
| 71,125     | 111,907    | 98,027     | 108,532    |
| 183,518    | 295,056    | 370,626    | 439,621    |
| 59,949     |            |            |            |
| 21,900     | 34,141     | 30,496     | 14,146     |
| 98,325     | 124,208    | 180,865    | 188,284    |
| 5,387,020  | 6,655,581  | 9,202,128  | 8,887,839  |
| 3,972,325  | 3,750,447  | 3,889,831  | 3,619,613  |
| 3,052,876  | 3,555,621  | 2,839,613  | 3,265,498  |
| 36,307,960 | 26,311,536 | 23,192,424 | 21,060,490 |
| 24,392     | 24,654     | 44,702     | 23,869     |
| 231,523    | 201,800    | 163,767    | 116,207    |
| 100,886    | 89,094     | 90,954     | 73,759     |
| 4,575,457  | 5,406,040  | 6,401,236  | 5,820,486  |
| 74,564     | 66,291     | 79,886     | 94,859     |

202 2-methylbutyrylcarnitine  
937 2-oleoylglycerophosphocholine\*  
930 2-palmitoylglycerophosphocholine\*  
935 2-stearoylglycerophosphocholine\*  
821 3-dehydrocarnitine\*  
170 3-indoxyl sulfate  
  
172 3-methyl-2-oxobutyrate  
  
173 3-methyl-2-oxovalerate  
  
529 3-phosphoglycerate  
  
193 4-methyl-2-oxopentanoate  
266 5-methylthioadenosine (MTA)  
282 5-oxoproline  
  
545 6-phosphogluconate  
1024 7-beta-hydroxycholesterol  
712.5 9,10-epoxyoctadec-12(Z)-enoic acid  
672 9,10-epoxystearate  
822 acetylcarnitine  
601 acetylphosphate  
  
1105 adenine  
  
1106 adenosine  
  
1116 adenosine 5'-diphosphate (ADP)  
  
1232 adenosine 5'diphosphoribose  
  
1114 adenosine 5'-monophosphate (AMP)  
665 adenate (22:4n6)

| PATHWAY SORT<br>ORDER | BIOCHEMICAL NAME             | DARM-00027      | DARM-00028       | DARM-00029       | DARM-00030       |
|-----------------------|------------------------------|-----------------|------------------|------------------|------------------|
|                       |                              | NHSCI 1866 C D7 | NHSCI 1866 C D14 | NHSCI 1866 C D21 | NHSCI 1866 C D51 |
|                       |                              | 997723          | 997728           | 997722           | 997744           |
|                       |                              | 991372          | 991373           | 991374           | 991375           |
|                       |                              | NHSCI 1866 C D7 | NHSCI 1866 C D14 | NHSCI 1866 C D21 | NHSCI 1866 C D28 |
|                       |                              | C D7            | C D14            | C D21            | C D28            |
|                       |                              | 181.946         | 180.175          | 185.286          | 186.197          |
|                       |                              | C D7            | C D14            | C D21            | C D28            |
|                       | 27 alanine                   | 59,010,100      | 70,591,808       | 57,490,560       | 64,239,864       |
|                       | 1150 allantoin               | 23,605          |                  | 15,289           | 23,737           |
|                       | 179 alpha-hydroxyisocaproate |                 | 133,295          | 223,270          | 320,248          |
|                       | 198 alpha-hydroxyisovalerate | 280,019         | 397,562          | 500,789          | 635,087          |
|                       | 1266 alpha-tocopherol        | 136,646         | 191,922          | 114,256          | 130,652          |
|                       | 1034 androsterone sulfate    | 8,112           | 7,077            | 6,701            | 9,389            |
|                       | 566 arabinose                | 361,155         | 351,108          | 282,015          | 276,692          |
|                       | 546 arabitol                 | 477,814         | 510,724          | 462,336          | 631,655          |
|                       | 1202 arabonate               | 109,597         | 103,372          | 72,624           | 110,717          |
|                       | 659 arachidonate (20:4n6)    | 823,763         | 838,584          | 1,176,509        | 944,103          |
|                       | 241 arginine                 | 1,242,925       | 1,631,118        | 1,454,897        | 549,452          |
|                       | 25 asparagine                | 1,254,520       | 1,397,682        | 1,004,096        | 1,295,981        |
|                       | 24 aspartate                 | 2,459,311       | 3,225,898        | 3,106,433        | 3,999,182        |
|                       | 721 azelate (nonanedioate)   | 14,007          | 24,954           | 36,298           | 42,424           |
|                       | 26 beta-alanine              | 77,848          | 84,345           | 74,068           | 184,491          |
|                       | 7 beta-hydroxypyruvate       | 251,874         | 337,569          | 154,928          | 239,218          |
|                       | 22 betaine                   | 1,626,279       | 1,728,294        | 1,672,991        | 1,688,387        |
|                       | 1057 beta-sitosterol         | 50,513          | 58,349           | 40,491           | 35,062           |
|                       | 1216 biliverdin              | 26,329          | 18,371           | 36,174           | 52,215           |

| DARM-00027      | DARM-00028       | DARM-00029       | DARM-00030       |
|-----------------|------------------|------------------|------------------|
| NHSCI 1866 C D7 | NHSCI 1866 C D14 | NHSCI 1866 C D21 | NHSCI 1866 C D51 |
| 997723          | 997728           | 997722           | 997744           |
| 991372          | 991373           | 991374           | 991375           |
| NHSCI 1866 C D7 | NHSCI 1866 C D14 | NHSCI 1866 C D21 | NHSCI 1866 C D28 |
| C D7            | C D14            | C D21            | C D28            |
| 181.946         | 180.175          | 185.286          | 186.197          |

**PATHWAY SORT**

**ORDER            BIOCHEMICAL NAME**

| C D7        | C D14       | C D21       | C D28       |
|-------------|-------------|-------------|-------------|
| 25,466      |             | 18,848      | 19,521      |
| 3,417,860   | 3,098,230   | 3,143,026   | 3,179,570   |
| 169,601     | 343,638     | 332,088     | 252,559     |
| 22,388      | 32,120      | 25,005      | 22,274      |
| 44,492      | 30,729      | 28,846      | 26,717      |
| 32,838      | 47,004      | 34,072      | 29,931      |
| 886,367     | 989,525     | 907,057     | 1,017,687   |
| 82,344      | 76,843      | 80,589      | 75,807      |
| 34,204      | 32,858      | 32,617      | 33,572      |
| 33,314,874  | 40,148,852  | 30,020,408  | 34,903,636  |
| 2,131,830   | 2,210,468   | 2,180,703   | 2,098,193   |
| 791,270     | 840,415     | 873,276     | 778,737     |
| 203,724     | 188,204     | 194,304     | 256,726     |
| 239,197,344 | 233,029,664 | 175,058,144 | 150,407,968 |
| 97,201      | 115,885     | 106,913     | 116,739     |
| 3,795,108   | 3,682,630   | 3,742,688   | 3,720,130   |
| 298,824     | 329,233     | 412,330     | 413,987     |
| 661,165     | 1,171,320   | 993,262     | 1,329,492   |
| 591,736     | 576,227     | 567,295     | 549,537     |
| 79,059      | 67,573      | 99,750      | 69,913      |
| 76,597      | 81,738      | 104,133     | 67,178      |
| 34,163      |             |             | 23,090      |
| 463,672     | 353,777     | 314,053     | 438,720     |
| 167,778     | 160,543     | 234,436     | 154,398     |
| 91,538      | 88,988      | 135,122     | 107,994     |
| 150,263     | 160,535     | 198,839     | 196,233     |
| 873,930     | 828,627     | 858,040     | 776,286     |
| 246,738     | 386,464     |             | 490,737     |
| 937,482     | 1,422,206   | 1,287,599   | 1,576,778   |
| 399,630     | 469,898     | 481,616     | 656,974     |

| PATHWAY SORT |                                    | DARM-00027      | DARM-00028       | DARM-00029       | DARM-00030       |
|--------------|------------------------------------|-----------------|------------------|------------------|------------------|
| ORDER        | BIOCHEMICAL NAME                   | NHSCI 1866 C D7 | NHSCI 1866 C D14 | NHSCI 1866 C D21 | NHSCI 1866 C D51 |
|              |                                    | 997723          | 997728           | 997722           | 997744           |
|              |                                    | 991372          | 991373           | 991374           | 991375           |
|              |                                    | NHSCI 1866 C D7 | NHSCI 1866 C D14 | NHSCI 1866 C D21 | NHSCI 1866 C D28 |
|              |                                    | C D7            | C D14            | C D21            | C D28            |
|              |                                    | 181.946         | 180.175          | 185.286          | 186.197          |
|              |                                    | C D7            | C D14            | C D21            | C D28            |
|              | 876 ethanolamine                   | 325,509         | 451,993          | 363,962          | 959,334          |
|              | 472 fructose                       | 68,505,920      | 81,753,176       | 71,085,720       | 84,452,280       |
|              | 524 fructose-6-phosphate           | 553,045         | 646,289          | 506,948          | 475,395          |
|              | 594 fumarate                       | 522,600         | 574,550          | 537,816          | 501,266          |
|              | 404 gamma-glutamylleucine          | 21,952          | 16,951           | 24,416           | 18,848           |
|              | 521 glucose                        | 1,039,883,456   | 1,089,999,360    | 951,012,160      | 997,553,728      |
|              | 519 glucose-6-phosphate (G6P)      | 1,502,941       | 1,664,616        | 1,464,321        | 1,516,292        |
|              | 39 glutamate                       | 6,284,719       | 7,018,903        | 5,429,270        | 6,033,070        |
|              | 44 glutamine                       | 1,723,548       | 1,384,945        | 1,212,226        | 1,184,348        |
|              | 80 glutaroyl carnitine             | 15,353          | 17,731           | 17,376           | 22,019           |
|              | 283 glutathione, oxidized (GSSG)   | 1,270,879       | 1,020,500        | 926,367          | 1,200,988        |
|              | 280 glutathione, reduced (GSH)     | 18,079,298      | 24,764,038       | 21,248,432       | 20,547,928       |
|              | 517 glycerate                      | 499,548         | 620,731          | 732,564          | 908,512          |
|              | 882 glycerol 3-phosphate (G3P)     | 355,687         | 348,275          | 286,390          | 202,625          |
|              | 883 glycerophosphorylcholine (GPC) | 148,260         | 168,340          | 157,523          | 160,346          |
|              | 1 glycine                          | 33,644,972      | 49,065,748       | 46,324,516       | 51,901,188       |
|              | 851 glycochenodeoxycholate         | 103,526         | 99,755           | 93,377           | 78,893           |
|              | 840 glycocholate                   | 60,575          | 49,236           | 52,828           | 44,676           |
|              | 849 glycodeoxycholate              | 26,398          | 41,886           | 34,653           | 42,344           |
|              | 1318 glycolate (hydroxyacetate)    | 379,420         | 463,703          | 355,768          | 433,516          |
|              | 1128 guanosine                     | 26,356          | 27,701           | 25,858           | 24,958           |
|              | 1212 heme*                         | 636,851         | 1,905,266        | 2,001,279        | 9,562,559        |
|              | 619 heptanoate (7:0)               | 10,281          | 8,621            | 9,196            | 10,045           |
|              | 823 hexanoylcarnitine              | 43,338          | 26,171           | 31,616           | 32,959           |
|              | 1288 hippurate                     | 58,894          | 51,578           | 48,359           | 50,721           |
|              | 50 histidine                       | 44,508          | 45,454           | 41,544           | 39,166           |

| PATHWAY SORT<br>ORDER | BIOCHEMICAL NAME                                                        | DARM-00027      | DARM-00028       | DARM-00029       | DARM-00030       |
|-----------------------|-------------------------------------------------------------------------|-----------------|------------------|------------------|------------------|
|                       |                                                                         | NHSCI 1866 C D7 | NHSCI 1866 C D14 | NHSCI 1866 C D21 | NHSCI 1866 C D51 |
|                       |                                                                         | 997723          | 997728           | 997722           | 997744           |
|                       |                                                                         | 991372          | 991373           | 991374           | 991375           |
|                       |                                                                         | NHSCI 1866 C D7 | NHSCI 1866 C D14 | NHSCI 1866 C D21 | NHSCI 1866 C D28 |
|                       |                                                                         | C D7            | C D14            | C D21            | C D28            |
|                       |                                                                         | 181.946         | 180.175          | 185.286          | 186.197          |
|                       |                                                                         | C D7            | C D14            | C D21            | C D28            |
|                       | 231 homocysteine                                                        | 32,666          | 87,447           | 73,188           | 79,757           |
|                       | 1585 homostachydrine*                                                   | 27,786          | 36,490           | 27,568           | 32,484           |
|                       | 206 hydroxyisovaleroyl carnitine                                        | 396,962         | 366,801          | 364,054          | 354,559          |
|                       | 1098 hypoxanthine                                                       | 237,200         | 785,728          | 2,546,911        | 6,082,068        |
|                       | 1101 inosine 5'-monophosphate (IMP)                                     | 328,889         | 582,387          | 331,913          | 339,770          |
|                       | Isobar: fructose 1,6-diphosphate, glucose 1,6-diphosphate, myo-inositol |                 |                  |                  |                  |
|                       | 527 1,4 or 1,3-diphosphate                                              | 55,048          | 50,627           | 53,103           | 35,784           |
|                       | 561 Isobar: ribulose 5-phosphate, xylulose 5-phosphate                  | 77,308          | 85,729           | 55,929           | 65,253           |
|                       | 496 Isobar: sorbitol, mannitol                                          | 18,733,526      | 17,814,282       | 18,544,120       | 18,990,472       |
|                       | 200 isobutyrylcarnitine                                                 | 163,111         | 137,186          | 138,537          | 130,574          |
|                       | 180 isoleucine                                                          | 4,663,533       | 4,409,751        | 4,377,872        | 4,644,256        |
|                       | 478 isomaltose                                                          | 1,872,634       | 1,872,018        | 1,507,209        | 1,745,698        |
|                       | 205 isovalerylcarnitine                                                 | 101,548         | 111,929          | 113,812          | 89,564           |
|                       | 144 kynurenine                                                          | 136,839         | 121,669          | 158,329          | 128,163          |
|                       | 536 lactate                                                             | 743,800,768     | 1,301,145,344    | 1,372,414,208    | 1,640,015,488    |
|                       | 1018 lathosterol                                                        | 38,989          | 49,485           |                  |                  |
|                       | 625 laurate (12:0)                                                      | 127,706         | 142,753          | 143,001          | 121,349          |
|                       | 181 leucine                                                             | 9,521,423       | 9,576,510        | 9,373,946        | 10,474,238       |

| DARM-00027      | DARM-00028       | DARM-00029       | DARM-00030       |
|-----------------|------------------|------------------|------------------|
| NHSCI 1866 C D7 | NHSCI 1866 C D14 | NHSCI 1866 C D21 | NHSCI 1866 C D51 |
| 997723          | 997728           | 997722           | 997744           |
| 991372          | 991373           | 991374           | 991375           |
| NHSCI 1866 C D7 | NHSCI 1866 C D14 | NHSCI 1866 C D21 | NHSCI 1866 C D28 |
| C D7            | C D14            | C D21            | C D28            |
| 181.946         | 180.175          | 185.286          | 186.197          |

**PATHWAY SORT**

| ORDER  | BIOCHEMICAL NAME                           | C D7       | C D14      | C D21      | C D28      |
|--------|--------------------------------------------|------------|------------|------------|------------|
| 604    | linoleate (18:2n6)                         | 3,532,413  | 3,434,276  | 4,306,622  | 3,115,737  |
| 608    | linolenate [alpha or gamma; (18:3n3 or 6)] | 544,045    | 655,342    | 676,656    | 560,640    |
| 69     | lysine                                     | 1,985,777  | 2,449,953  | 1,618,185  | 3,332,711  |
| 598    | malate                                     | 1,507,907  | 1,988,038  | 1,840,882  | 2,524,373  |
| 482    | maltose                                    | 1,153,248  | 1,375,508  | 1,119,766  | 1,049,543  |
| 487    | mannose                                    | 13,239,841 | 14,826,829 | 11,488,961 | 12,203,624 |
| 489    | mannose-6-phosphate                        | 199,106    | 251,148    | 233,714    | 264,289    |
| 635    | margarate (17:0)                           | 482,030    | 431,418    | 579,953    | 416,367    |
| 658    | mead acid (20:3n9)                         | 12,961     | 19,272     | 12,276     | 7,756      |
| 225    | methionine                                 | 864,860    | 610,165    | 444,437    | 406,243    |
| 890    | myo-inositol                               | 1,971,318  | 2,201,784  | 1,795,906  | 1,954,884  |
| 629    | myristate (14:0)                           | 666,258    | 740,326    | 902,147    | 709,081    |
| 630    | myristoleate (14:1n5)                      | 19,377     | 28,689     | 32,995     | 24,186     |
| 1242.1 | N1-Methyl-2-pyridone-5-carboxamide         | 169,135    | 171,621    | 76,472     | 147,074    |
| 75     | N-6-trimethyllysine                        | 274,891    | 182,982    | 223,191    | 178,198    |
| 4      | N-acetylglycine                            | 67,489     | 65,786     | 100,518    | 101,630    |
| 227    | N-acetylmethionine                         | 4,576      | 5,901      | 4,937      | 5,013      |
| 455    | N-acetylneuraminat                         | 39,246     | 97,244     | 91,567     | 81,988     |
| 1221   | nicotinamide                               | 2,519,914  | 2,606,459  | 2,753,504  | 2,514,949  |
| 1224   | nicotinamide adenine dinucleotide (NAD+)   | 3,656      | 3,817      | 3,607      | 7,409      |
| 825    | octanoylcarnitine                          | 66,818     | 69,316     | 73,599     | 73,250     |
| 639    | oleate (18:1n9)                            | 675,705    | 773,779    | 737,139    | 824,894    |
| 835    | oleoylcarnitine                            | 296,722    | 839,169    | 1,173,849  | 6,755,525  |



|                               | DARM-00027      | DARM-00028       | DARM-00029       | DARM-00030       |
|-------------------------------|-----------------|------------------|------------------|------------------|
|                               | NHSCI 1866 C D7 | NHSCI 1866 C D14 | NHSCI 1866 C D21 | NHSCI 1866 C D51 |
|                               | 997723          | 997728           | 997722           | 997744           |
|                               | 991372          | 991373           | 991374           | 991375           |
|                               | NHSCI 1866 C D7 | NHSCI 1866 C D14 | NHSCI 1866 C D21 | NHSCI 1866 C D28 |
|                               | C D7            | C D14            | C D21            | C D28            |
|                               | 181.946         | 180.175          | 185.286          | 186.197          |
|                               | C D7            | C D14            | C D21            | C D28            |
|                               | 50,721          | 28,414           |                  |                  |
| 244 ornithine                 | 10,093,262      | 10,921,280       | 8,529,724        | 13,036,086       |
| 632 palmitate (16:0)          | 8,209,507       | 8,075,588        | 9,564,448        | 7,921,516        |
| 633 palmitoleate (16:1n7)     | 580,007         | 421,599          | 525,917          | 372,048          |
| 1004 palmitoyl sphingomyelin  | 14,827,738      | 16,726,182       | 12,126,371       | 14,610,131       |
| 833 palmitoylcarnitine        | 261,552         | 452,163          | 563,927          | 4,437,191        |
| 1243 pantothenate             | 95,089          | 94,199           | 147,169          | 99,677           |
| 1613 paraxanthine             | 443,009         | 461,396          | 465,535          | 461,229          |
| 88 p-cresol sulfate           | 47,429          | 44,307           | 44,968           | 42,116           |
| 621 pelargonate (9:0)         | 213,751         | 232,404          | 230,384          | 187,391          |
| 631 pentadecanoate (15:0)     | 237,729         | 249,538          | 320,664          | 238,384          |
| 135 phenol sulfate            | 17,688          | 21,920           | 20,488           | 16,515           |
| 128 phenylacetylglutamine     | 41,655          | 42,652           | 42,530           | 44,447           |
| 83 phenylalanine              | 8,497,740       | 8,430,026        | 8,708,808        | 9,319,272        |
| 602 phosphate                 | 1,101,179,264   | 1,367,314,816    | 1,115,626,624    | 1,211,363,840    |
| 534 phosphoenolpyruvate (PEP) | 116,097         | 66,183           | 21,439           |                  |
| 877 phosphoethanolamine       |                 |                  |                  | 50,346           |
| 74 pipecolate                 | 86,158          | 85,900           | 94,000           | 107,875          |
| 1531 piperine                 | 144,936         | 157,719          | 78,523           | 83,224           |
| 246 proline                   | 2,276,136       | 2,143,683        | 2,344,439        | 2,205,136        |
| 809 propionylcarnitine        | 1,289,884       | 1,089,291        | 1,003,801        | 1,026,906        |
| 1181 pseudouridine            | 8,071           | 6,295            | 8,016            | 10,189           |
| 45 pyroglutamine*             | 217,914         | 153,990          | 165,113          | 199,223          |
| 603 pyrophosphate (PPi)       | 102,490         | 92,626           | 27,461           | 76,834           |

**PATHWAY SORT**

**ORDER      BIOCHEMICAL NAME**

285 ophthalmate

244 ornithine

632 palmitate (16:0)

633 palmitoleate (16:1n7)

1004 palmitoyl sphingomyelin

833 palmitoylcarnitine

1243 pantothenate

1613 paraxanthine

88 p-cresol sulfate

621 pelargonate (9:0)

631 pentadecanoate (15:0)

135 phenol sulfate

128 phenylacetylglutamine

83 phenylalanine

602 phosphate

534 phosphoenolpyruvate (PEP)

877 phosphoethanolamine

74 pipecolate

1531 piperine

246 proline

809 propionylcarnitine

1181 pseudouridine

45 pyroglutamine\*

603 pyrophosphate (PPi)

| PATHWAY SORT<br>ORDER | BIOCHEMICAL NAME             | DARM-00027      | DARM-00028       | DARM-00029       | DARM-00030       |
|-----------------------|------------------------------|-----------------|------------------|------------------|------------------|
|                       |                              | NHSCI 1866 C D7 | NHSCI 1866 C D14 | NHSCI 1866 C D21 | NHSCI 1866 C D51 |
|                       |                              | 997723          | 997728           | 997722           | 997744           |
|                       |                              | 991372          | 991373           | 991374           | 991375           |
|                       |                              | NHSCI 1866 C D7 | NHSCI 1866 C D14 | NHSCI 1866 C D21 | NHSCI 1866 C D28 |
|                       |                              | C D7            | C D14            | C D21            | C D28            |
|                       |                              | 181.946         | 180.175          | 185.286          | 186.197          |
|                       |                              | C D7            | C D14            | C D21            | C D28            |
|                       |                              | 2,612,024       | 1,233,071        | 1,064,282        | 884,012          |
| 535                   | pyruvate                     |                 |                  |                  |                  |
| 1469                  | ranitidine                   |                 |                  |                  |                  |
| 548                   | ribitol                      | 192,978         | 151,854          | 156,197          | 250,366          |
| 557                   | ribose 5-phosphate           | 103,861         | 156,431          | 155,592          | 65,059           |
| 559                   | ribulose                     | 20,289          | 26,440           | 22,860           | 32,354           |
| 224                   | S-adenosylhomocysteine (SAH) | 215,285         | 218,722          | 251,737          | 229,574          |
| 551                   | sedoheptulose-7-phosphate    | 34,147          | 45,388           | 73,991           | 149,773          |
| 8                     | serine                       | 7,328,767       | 9,014,268        | 7,163,924        | 8,348,743        |
| 216                   | S-methylcysteine             | 60,126          | 107,130          | 58,716           | 85,171           |
| 281                   | S-methylglutathione          | 33,263          | 25,149           | 30,967           | 48,782           |
| 270                   | spermidine                   | 1,483,578       | 1,562,241        | 1,630,592        | 1,594,886        |
| 1584                  | stachydrine                  | 3,516,873       | 3,386,667        | 3,385,275        | 3,445,669        |
| 637                   | stearate (18:0)              | 8,055,712       | 7,885,242        | 9,392,982        | 7,982,961        |
| 1005                  | stearoyl sphingomyelin       | 985,680         | 1,102,903        | 1,171,900        | 992,645          |
| 834                   | stearoylcarnitine            | 105,241         | 339,318          | 430,841          | 2,472,239        |
| 591                   | succinylcarnitine            | 580,363         | 608,239          | 644,169          | 647,327          |
| 1662                  | terephthalic acid            | 386,525         | 336,663          | 361,405          | 375,317          |
| 1614                  | theobromine                  | 219,573         | 207,816          | 229,773          | 168,888          |
| 1615                  | theophylline                 | 141,504         | 87,686           | 160,482          | 73,034           |
| 549                   | threitol                     | 774,444         | 1,009,916        | 766,303          | 965,406          |
| 1199                  | threonate                    | 436,950         | 480,646          | 457,574          | 409,992          |
| 17                    | threonine                    | 180,434         | 201,578          | 227,682          | 242,880          |
| 252                   | trans-4-hydroxyproline       | 25,854          | 27,239           | 27,820           | 23,271           |

| PATHWAY SORT<br>ORDER | BIOCHEMICAL NAME                                     | DARM-00027      | DARM-00028       | DARM-00029       | DARM-00030       |
|-----------------------|------------------------------------------------------|-----------------|------------------|------------------|------------------|
|                       |                                                      | NHSCI 1866 C D7 | NHSCI 1866 C D14 | NHSCI 1866 C D21 | NHSCI 1866 C D51 |
|                       |                                                      | 997723          | 997728           | 997722           | 997744           |
|                       |                                                      | 991372          | 991373           | 991374           | 991375           |
|                       |                                                      | NHSCI 1866 C D7 | NHSCI 1866 C D14 | NHSCI 1866 C D21 | NHSCI 1866 C D28 |
|                       |                                                      | C D7            | C D14            | C D21            | C D28            |
|                       |                                                      | 181.946         | 180.175          | 185.286          | 186.197          |
|                       |                                                      | C D7            | C D14            | C D21            | C D28            |
|                       | 501 trehalose                                        | 476,243         | 998,895          | 791,556          | 1,379,798        |
|                       | 1242 trigonelline (N <sup>1</sup> -methylnicotinate) | 476,134         | 476,112          | 501,977          | 487,468          |
|                       | 145 tryptophan                                       | 3,808,759       | 4,151,956        | 4,103,621        | 4,203,022        |
|                       | 151 tryptophan betaine                               | 4,345,513       | 4,368,475        | 4,281,072        | 4,256,259        |
|                       | 99 tyrosine                                          | 2,597,682       | 2,713,701        | 2,648,452        | 2,987,171        |
|                       | 1149 urate                                           | 189,204         | 172,683          | 170,845          | 138,051          |
|                       | 245 urea                                             | 24,193,656      | 27,595,104       | 24,141,402       | 26,030,124       |
|                       | 1180 uridine                                         | 29,864          | 34,372           | 40,913           | 41,433           |
|                       | 190 valine                                           | 9,670,583       | 10,262,873       | 10,083,593       | 10,646,373       |
|                       | 565 xylitol                                          |                 | 13,661           |                  |                  |
|                       | 570 xylonate                                         | 58,551          | 77,409           | 56,203           | 71,113           |
|                       | 569 xylose                                           | 151,298         | 112,753          |                  | 87,341           |

**PATHWAY**

| <b>SORTORDER</b> | <b>BIOCHEMICAL NAME</b>                           | <b>SUPER PATHWAY</b> | <b>SUB PATHWAY</b>                               | <b>COMP ID</b> | <b>PLATFORM</b> | <b>RI</b> | <b>MASS</b> | <b>CAS</b>   |
|------------------|---------------------------------------------------|----------------------|--------------------------------------------------|----------------|-----------------|-----------|-------------|--------------|
| 905              | 1,2-propanediol                                   | Lipid                | Ketone bodies                                    | 38002          | GC/MS           | 1041      | 117         | 57-55-6;     |
| 532              | 1,3-dihydroxyacetone                              | Carbohydrate         | Glycolysis, gluconeogenesis, pyruvate metabolism | 35981          | GC/MS           | 1349      | 306.1       | 62147-49-3;  |
| 515              | 1,5-anhydroglucitol (1,5-AG)                      | Carbohydrate         | Glycolysis, gluconeogenesis, pyruvate metabolism | 20675          | GC/MS           | 1788.7    | 217         | 154-58-5;    |
| 523              | 1,6-anhydroglucose                                | Carbohydrate         | pyruvate metabolism                              | 21049          | GC/MS           | 1679.5    | 204.1       | 498-07-7;    |
| 636              | 10-heptadecenoate (17:1n7)                        | Lipid                | Long chain fatty acid                            | 33971          | LC/MS Neg       | 5558      | 267.3       | 29743-97-3;  |
| 742              | 13-methylmyristic acid                            | Lipid                | Fatty acid, branched                             | 38293          | LC/MS Neg       | 5498      | 241.3       | 2485-71-4;   |
| 744              | 15-methylpalmitate (isobar with 2-                | Lipid                | Fatty acid, branched                             | 38768          | LC/MS Neg       | 5698      | 269.4       |              |
| 919              | 1-arachidonoylglycerophosphoethanolamine*         | Lipid                | Lysolipid                                        | 35186          | LC/MS Neg       | 5731      | 500.3       |              |
| 938              | 1-linoleoylglycerophosphocholine                  | Lipid                | Lysolipid                                        | 34419          | LC/MS Neg       | 5844      | 594         |              |
| 926              | 1-myristoylglycerophosphocholine                  | Lipid                | Lysolipid                                        | 35626          | LC/MS Pos       | 5481      | 468.3       | 20559-16-4;  |
| 936              | 1-oleoylglycerophosphocholine                     | Lipid                | Lysolipid                                        | 33960          | LC/MS Pos       | 5700      | 522.4       | 19420-56-5;  |
| 915              | 1-oleoylglycerophosphoethanolamine                | Lipid                | Lysolipid                                        | 35628          | LC/MS Neg       | 5928      | 478.3       |              |
| 970              | 1-palmitoylglycerol (1-monopalmitin)              | Lipid                | Monoacylglycerol                                 | 21127          | GC/MS           | 2119.5    | 371.3       | 542-44-9;    |
| 929              | 1-palmitoylglycerophosphocholine                  | Lipid                | Lysolipid                                        | 33955          | LC/MS Pos       | 5671      | 496.4       | 17364-16-8;  |
| 909              | 1-palmitoylglycerophosphoethanolamine             | Lipid                | Lysolipid                                        | 35631          | LC/MS Neg       | 5940      | 452.3       |              |
| 934              | 1-stearoylglycerophosphocholine                   | Lipid                | Lysolipid                                        | 33961          | LC/MS Pos       | 5844      | 524.4       | 19420-57-6;  |
| 533              | 2,3-diphosphoglycerate                            | Carbohydrate         | Glycolysis, gluconeogenesis, pyruvate metabolism | 15664          | LC/MS Neg       | 580       | 264.9       | 102783-53-9; |
| 263              | 2-aminobutyrate                                   | Amino acid           | Butanoate metabolism                             | 1577           | GC/MS           | 1215.7    | 130         | 1492-24-6;   |
| 945              | 2-arachidonoylglycerophosphocholine*              | Lipid                | Lysolipid                                        | 35256          | LC/MS Pos       | 5524      | 544.3       |              |
| 920              | 2-arachidonoylglycerophosphoethanolamine*         | Lipid                | Lysolipid                                        | 34656          | LC/MS Pos       | 5525      | 502.3       |              |
| 923              | 2-docosahexaenoylglycerophosphoethanolamine*      | Lipid                | Lysolipid                                        | 34258          | LC/MS Pos       | 5512      | 526.2       |              |
| 922              | 2-docosapentaenoylglycerophosphoethanolamine*     | Lipid                | Lysolipid                                        | 34875          | LC/MS Pos       | 5548      | 528.2       |              |
| 1360             | 2-ethylhexanoate (isobar with 2-propylpentanoate) | Xenobiotics          | Chemical                                         | 35490          | LC/MS Neg       | 3909      | 143.1       |              |
| 229              | 2-hydroxybutyrate (AHB)                           | Amino acid           | Cysteine, methionine, SAM, taurine metabolism    | 21044          | GC/MS           | 1169.4    | 130.9       | 3347-90-8;   |
| 714              | 2-hydroxyglutarate                                | Lipid                | Fatty acid, dicarboxylate                        | 37253          | GC/MS           | 1576      | 247         | 40951-21-1;  |
| 706              | 2-hydroxypalmitate                                | Lipid                | Fatty acid, monohydroxy                          | 35675          | LC/MS Neg       | 5508      | 271.3       | 764-67-0;    |
| 939              | 2-linoleoylglycerophosphocholine*                 | Lipid                | Lysolipid                                        | 35257          | LC/MS Pos       | 5544      | 520.4       |              |
| 202              | 2-methylbutyrocarnitine                           | Amino acid           | Valine, leucine and isoleucine                   | 35431          | LC/MS Pos       | 2439      | 246.1       | 31023-25-3;  |
| 937              | 2-oleoylglycerophosphocholine*                    | Lipid                | Lysolipid                                        | 35254          | LC/MS Pos       | 5640      | 522.4       |              |
| 930              | 2-palmitoylglycerophosphocholine*                 | Lipid                | Lysolipid                                        | 35253          | LC/MS Pos       | 5604      | 496.3       |              |

**PATHWAY**

| <b>SORTORDER</b> | <b>BIOCHEMICAL NAME</b>            | <b>SUPER PATHWAY</b>   | <b>SUB PATHWAY</b>                               | <b>COMP ID</b> | <b>PLATFORM</b> | <b>RI</b> | <b>MASS</b> | <b>CAS</b>           |
|------------------|------------------------------------|------------------------|--------------------------------------------------|----------------|-----------------|-----------|-------------|----------------------|
| 935              | 2-stearoylglycerophosphocholine*   | Lipid                  | Lysolipid                                        | 35255          | LC/MS Pos       | 5780      | 524.4       |                      |
| 821              | 3-dehydrocarnitine*                | Lipid                  | Carnitine metabolism                             | 32654          | LC/MS Pos       | 1020      | 160.2       | 10457-99-5;          |
| 170              | 3-indoxyl sulfate                  | Amino acid             | Tryptophan metabolism                            | 27672          | LC/MS Neg       | 2258      | 212         | 2642-37-7;           |
| 172              | 3-methyl-2-oxobutyrate             | Amino acid             | Valine, leucine and isoleucine                   | 21047          | LC/MS Neg       | 1489      | 115.1       | 3715-29-5;           |
| 173              | 3-methyl-2-oxovalerate             | Amino acid             | Valine, leucine and isoleucine                   | 15676          | LC/MS Neg       | 2106      | 129.2       | 51829-07-3;          |
| 529              | 3-phosphoglycerate                 | Carbohydrate           | Glycolysis, gluconeogenesis, pyruvate metabolism | 1414           | GC/MS           | 1754      | 299         | 80731-10-8;          |
| 193              | 4-methyl-2-oxopentanoate           | Amino acid             | Valine, leucine and isoleucine                   | 22116          | LC/MS Neg       | 2200      | 129.2       | 816-66-0;            |
| 266              | 5-methylthioadenosine (MTA)        | Amino acid             | Polyamine metabolism                             | 1419           | LC/MS Pos       | 2427      | 298.1       | 2457-80-9;           |
| 282              | 5-oxoproline                       | Amino acid             | Glutathione metabolism                           | 1494           | LC/MS Neg       | 744       | 128.2       | 98-79-3;             |
| 545              | 6-phosphogluconate                 | Carbohydrate           | Nucleotide sugars, pentose                       | 15442          | GC/MS           | 2060.4    | 387.2       | 921-62-0;53411-70-4; |
| 1024             | 7-beta-hydroxycholesterol          | Lipid                  | Sterol/Steroid                                   | 35092          | GC/MS           | 2340      | 456.4       | 566-27-8;            |
| 712.5            | 9,10-epoxyoctadec-12(Z)-enoic acid | Lipid                  | Long chain fatty acid                            | 38398          | LC/MS Neg       | 5328      | 295.4       |                      |
| 672              | 9,10-epoxystearate                 | Lipid                  | Fatty acid, oxidized                             | 39627          | LC/MS Neg       | 5386.6    | 297.4       |                      |
| 822              | acetylcarnitine                    | Lipid                  | Carnitine metabolism                             | 32198          | LC/MS Pos       | 1203      | 204.2       | 5080-50-2;           |
| 601              | acetylphosphate                    | Energy                 | Oxidative phosphorylation                        | 15488          | GC/MS           | 1263      | 211         | 94249-01-1;          |
| 1105             | adenine                            | Nucleotide             | Purine metabolism, adenine                       | 554            | LC/MS Pos       | 1003      | 136.1       | 73-24-5;             |
| 1106             | adenosine                          | Nucleotide             | Purine metabolism, adenine                       | 555            | LC/MS Pos       | 1650      | 268.1       | 58-61-7;             |
| 1116             | adenosine 5'-diphosphate (ADP)     | Nucleotide             | Purine metabolism, adenine                       | 3108           | LC/MS Neg       | 800       | 426.1       | 20398-34-9;          |
| 1232             | adenosine 5'diphosphoribose        | Cofactors and vitamins | Nicotinate and nicotinamide                      | 558            | LC/MS Neg       | 964       | 558.1       | 68414-18-6;          |
| 1114             | adenosine 5'-monophosphate (AMP)   | Nucleotide             | Purine metabolism, adenine                       | 32342          | LC/MS Pos       | 1210      | 348.1       | 149022-20-8;         |
| 665              | adrenate (22:4n6)                  | Lipid                  | Long chain fatty acid                            | 32980          | LC/MS Neg       | 5684      | 331.3       | 2091-25-0;           |
| 27               | alanine                            | Amino acid             | Alanine and aspartate                            | 1126           | GC/MS           | 1147.6    | 115.9       | 56-41-7;             |
| 1150             | allantoin                          | Nucleotide             | Purine metabolism, urate                         | 1107           | GC/MS           | 1809.8    | 518.3       | 97-59-6;             |
| 179              | alpha-hydroxyisocaproate           | Amino acid             | Valine, leucine and isoleucine                   | 22132          | GC/MS           | 1274      | 102.8       | 10303-64-7;          |
| 198              | alpha-hydroxyisovalerate           | Amino acid             | Valine, leucine and isoleucine                   | 33937          | GC/MS           | 1208      | 145.1       | 600-37-3;            |
| 1266             | alpha-tocopherol                   | Cofactors and vitamins | Tocopherol metabolism                            | 1561           | GC/MS           | 2305.4    | 502.5       | 59-02-9;10191-41-0;  |
| 1034             | androsterone sulfate               | Lipid                  | Sterol/Steroid                                   | 31591          | LC/MS Neg       | 5011      | 369.2       | 2479-86-9 ;          |
| 566              | arabinose                          | Carbohydrate           | Nucleotide sugars, pentose                       | 575            | GC/MS           | 1631.6    | 217         | 28697-53-2;          |
| 546              | arabitol                           | Carbohydrate           | Nucleotide sugars, pentose                       | 15964          | GC/MS           | 1687.5    | 217         | 488-82-4;            |
| 1202             | arabonate                          | Cofactors and vitamins | Ascorbate and aldarate                           | 37516          | GC/MS           | 1736      | 292.1       | 7643-75-7;           |
| 659              | arachidonate (20:4n6)              | Lipid                  | Long chain fatty acid                            | 1110           | LC/MS Neg       | 5525      | 303.4       | 506-32-1;            |
| 241              | arginine                           | Amino acid             | Urea cycle; arginine-, proline-,                 | 1638           | GC/MS           | 1608.5    | 142         | 1119-34-2;           |
| 25               | asparagine                         | Amino acid             | Alanine and aspartate                            | 512            | GC/MS           | 1617.5    | 188         | 70-47-3;             |
| 24               | aspartate                          | Amino acid             | Alanine and aspartate                            | 15996          | GC/MS           | 1529.7    | 232         | 56-84-8;             |

**PATHWAY**

| <b>SORTORDER</b> | <b>BIOCHEMICAL NAME</b>            | <b>SUPER PATHWAY</b>   | <b>SUB PATHWAY</b>                                      | <b>COMP ID</b> | <b>PLATFORM</b> | <b>RI</b> | <b>MASS</b> | <b>CAS</b>              |
|------------------|------------------------------------|------------------------|---------------------------------------------------------|----------------|-----------------|-----------|-------------|-------------------------|
| 721              | azelate (nonanedioate)             | Lipid                  | Fatty acid, dicarboxylate                               | 18362          | LC/MS Neg       | 1322      | 187.2       | 123-99-9;               |
| 26               | beta-alanine                       | Amino acid             | Alanine and aspartate                                   | 55             | GC/MS           | 1451.8    | 174         | 56-41-7;107-95-9;       |
| 7                | beta-hydroxypruvate                | Amino acid             | Glycine, serine and threonine                           | 15686          | GC/MS           | 1425.1    | 221         | 3369-79-7;              |
| 22               | betaine                            | Amino acid             | Glycine, serine and threonine                           | 3141           | LC/MS Pos       | 721       | 118.2       | 107-43-7;               |
| 1057             | beta-sitosterol                    | Lipid                  | Sterol/Steroid                                          | 27414          | GC/MS           | 2380.8    | 357.4       | 83-46-5;                |
| 1216             | biliverdin                         | Cofactors and vitamins | Hemoglobin and porphyrin<br>Fatty acid metabolism (also | 2137           | LC/MS Pos       | 4936      | 583.3       | 55482-27-4;55482-27-4 ; |
| 811              | butyrylcarnitine                   | Lipid                  | BCAA metabolism)                                        | 32412          | LC/MS Pos       | 2007      | 232.2       | 25576-40-3;             |
| 1612             | caffeine                           | Xenobiotics            | Xanthine metabolism                                     | 569            | LC/MS Pos       | 2820      | 195.1       | 58-08-2;                |
| 1059             | campesterol                        | Lipid                  | Sterol/Steroid                                          | 33997          | GC/MS           | 2353      | 129         | 474-62-4;               |
| 622              | caprate (10:0)                     | Lipid                  | Medium chain fatty acid                                 | 1642           | LC/MS Neg       | 5092      | 171.2       | 112-37-8;               |
| 618              | caproate (6:0)                     | Lipid                  | Medium chain fatty acid                                 | 32489          | LC/MS Neg       | 2766      | 115.2       | 142-62-1;               |
| 620              | caprylate (8:0)                    | Lipid                  | Medium chain fatty acid                                 | 32492          | LC/MS Neg       | 4367      | 143.2       | 124-07-2;               |
| 820              | carnitine                          | Lipid                  | Carnitine metabolism                                    | 15500          | LC/MS Pos       | 702       | 162.2       | 461-05-2;               |
| 1300             | catechol sulfate                   | Xenobiotics            | Benzoate metabolism                                     | 35320          | LC/MS Neg       | 1928      | 188.9       |                         |
| 164              | C-glycosyltryptophan*              | Amino acid             | Tryptophan metabolism                                   | 32675          | LC/MS Pos       | 1912      | 367.1       |                         |
| 1020             | cholesterol                        | Lipid                  | Sterol/Steroid                                          | 63             | GC/MS           | 2316.9    | 329.3       | 57-88-5;                |
| 881              | choline                            | Lipid                  | Glycerolipid metabolism                                 | 15506          | LC/MS Pos       | 674       | 104.2       | 67-48-1;                |
| 582              | cis-aconitate                      | Energy                 | Krebs cycle                                             | 12025          | LC/MS Neg       | 603       | 173.1       | 585-84-2;               |
| 641              | cis-vaccenate (18:1n7)             | Lipid                  | Long chain fatty acid                                   | 33970          | GC/MS           | 1987      | 339.3       | 693-72-1;               |
| 579              | citrate                            | Energy                 | Krebs cycle                                             | 1564           | GC/MS           | 1763.4    | 273.1       | 77-92-9;                |
| 248              | citrulline                         | Amino acid             | Urea cycle; arginine-, proline-,                        | 2132           | LC/MS Pos       | 715       | 176.1       | 372-75-8;               |
| 259              | creatine                           | Amino acid             | Creatine metabolism                                     | 27718          | LC/MS Pos       | 758       | 132.1       | 57-00-1;                |
| 260              | creatinine                         | Amino acid             | Creatine metabolism<br>Cysteine, methionine, SAM,       | 513            | LC/MS Pos       | 730       | 114.1       | 60-27-5;                |
| 213              | cysteine                           | Amino acid             | taurine metabolism                                      | 31453          | GC/MS           | 1560.1    | 218         | 52-90-4;56-89-3;        |
| 819              | deoxycarnitine                     | Lipid                  | Carnitine metabolism                                    | 36747          | LC/MS Pos       | 759       | 146.1       | 6249-56-5;              |
| 655              | dihomo-linoleate (20:2n6)          | Lipid                  | Long chain fatty acid                                   | 17805          | LC/MS Neg       | 5722      | 307.3       | 2091-39-6;              |
| 609              | dihomo-linolenate (20:3n3 or n6)   | Lipid                  | Essential fatty acid<br>Glycolysis, gluconeogenesis,    | 35718          | LC/MS Neg       | 5600      | 305.4       |                         |
| 531              | dihydroxyacetone phosphate (DHAP)  | Carbohydrate           | pyruvate metabolism                                     | 15522          | GC/MS           | 1737      | 315.1       | 102783-56-2;            |
| 3                | dimethylglycine                    | Amino acid             | Glycine, serine and threonine                           | 5086           | GC/MS           | 1030      | 57.9        | 1118-68-9;              |
| 613              | docosaheaxaenoate (DHA; 22:6n3)    | Lipid                  | Essential fatty acid                                    | 19323          | LC/MS Neg       | 5518      | 327.3       | 6217-54-5;              |
| 611              | docosapentaenoate (n3 DPA; 22:5n3) | Lipid                  | Essential fatty acid                                    | 32504          | LC/MS Neg       | 5574      | 329.4       | 2234-74-4 ;             |
| 610              | eicosapentaenoate (EPA; 20:5n3)    | Lipid                  | Essential fatty acid                                    | 18467          | LC/MS Neg       | 5442      | 301.3       | 10-2005-9;10417-94-4;   |

**PATHWAY**

| <b>SORTORDER</b> | <b>BIOCHEMICAL NAME</b>        | <b>SUPER PATHWAY</b>   | <b>SUB PATHWAY</b>                                           | <b>COMP ID</b> | <b>PLATFORM</b> | <b>RI</b> | <b>MASS</b> | <b>CAS</b>         |
|------------------|--------------------------------|------------------------|--------------------------------------------------------------|----------------|-----------------|-----------|-------------|--------------------|
| 1565             | ergothioneine                  | Xenobiotics            | Food component/Plant                                         | 37459          | LC/MS Pos       | 847       | 230.2       | 58511-63-0;        |
| 735              | erucamide                      | Lipid                  | Fatty acid, amide                                            | 35177          | GC/MS           | 2173      | 203         | 112-84-5;          |
| 1632             | erythritol                     | Xenobiotics            | Sugar, sugar substitute, starch                              | 20699          | GC/MS           | 1517.5    | 217         | 149-32-6;          |
| 453              | erythronate*                   | Carbohydrate           | Aminosugars metabolism                                       | 33477          | GC/MS           | 1546.9    | 292.1       | 13752-84-6;        |
| 876              | ethanolamine                   | Lipid                  | Glycerolipid metabolism                                      | 1497           | GC/MS           | 1304      | 174.1       | 141-43-5;          |
| 472              | fructose                       | Carbohydrate           | Fructose, mannose, galactose, starch, and sucrose metabolism | 31266          | GC/MS           | 1762.7    | 204         | 57-48-7;           |
| 524              | fructose-6-phosphate           | Carbohydrate           | Glycolysis, gluconeogenesis, pyruvate metabolism             | 12021          | GC/MS           | 1994.9    | 315.1       | 103213-47-4;       |
| 594              | fumarate                       | Energy                 | Krebs cycle                                                  | 1643           | GC/MS           | 1382.1    | 245         | 100-17-8;          |
| 404              | gamma-glutamylleucine          | Peptide                | gamma-glutamyl                                               | 18369          | LC/MS Pos       | 2744      | 261.2       | 2566-39-4;         |
| 521              | glucose                        | Carbohydrate           | Glycolysis, gluconeogenesis, pyruvate metabolism             | 20488          | GC/MS           | 1866.8    | 217.1       | 50-99-7;           |
| 519              | glucose-6-phosphate (G6P)      | Carbohydrate           | Glycolysis, gluconeogenesis, pyruvate metabolism             | 31260          | GC/MS           | 2042.7    | 387.2       | 103192-55-8;       |
| 39               | glutamate                      | Amino acid             | Glutamate metabolism                                         | 57             | GC/MS           | 1611.9    | 246         | 56-86-0;           |
| 44               | glutamine                      | Amino acid             | Glutamate metabolism                                         | 53             | LC/MS Pos       | 684       | 147.2       | 56-85-9;           |
| 80               | glutaroyl carnitine            | Amino acid             | Lysine metabolism                                            | 35439          | LC/MS Pos       | 1565      | 276.1       | 102636-82-8;       |
| 283              | glutathione, oxidized (GSSG)   | Amino acid             | Glutathione metabolism                                       | 27727          | LC/MS Pos       | 1535      | 613.1       | 103239-24-3;       |
| 280              | glutathione, reduced (GSH)     | Amino acid             | Glutathione metabolism                                       | 2127           | LC/MS Pos       | 1274      | 308.1       | 70-18-8;           |
| 517              | glycerate                      | Carbohydrate           | Glycolysis, gluconeogenesis, pyruvate metabolism             | 1572           | GC/MS           | 1360.7    | 189         | 600-19-1;          |
| 882              | glycerol 3-phosphate (G3P)     | Lipid                  | pyruvate metabolism                                          | 15365          | GC/MS           | 1719.7    | 357.1       | 29849-82-9;        |
| 883              | glycerophosphorylcholine (GPC) | Lipid                  | Glycerolipid metabolism                                      | 15990          | LC/MS Pos       | 694       | 258.1       | 28319-77-9;        |
| 1                | glycine                        | Amino acid             | Glycine, serine and threonine                                | 11777          | GC/MS           | 1166      | 101.9       | 56-40-6;           |
| 851              | glycochenodeoxycholate         | Lipid                  | Bile acid metabolism                                         | 32346          | LC/MS Neg       | 5245      | 448.4       | 16564-43-5;        |
| 840              | glycocholate                   | Lipid                  | Bile acid metabolism                                         | 18476          | LC/MS Neg       | 5104      | 464.4       | 475-31-0;863-57-0; |
| 849              | glycodeoxycholate              | Lipid                  | Bile acid metabolism                                         | 18477          | LC/MS Neg       | 5265      | 448.4       | 360-65-6;          |
| 1318             | glycolate (hydroxyacetate)     | Xenobiotics            | Chemical                                                     | 15737          | GC/MS           | 1119      | 177         | 79-14-1;           |
| 1128             | guanosine                      | Nucleotide             | Purine metabolism, guanine                                   | 1573           | LC/MS Pos       | 1676      | 284         | 118-00-3;          |
| 1212             | heme*                          | Cofactors and vitamins | Hemoglobin and porphyrin                                     | 32593          | LC/MS Pos       | 4985      | 616.2       | 14875-96-8;        |
| 619              | heptanoate (7:0)               | Lipid                  | Medium chain fatty acid                                      | 1644           | LC/MS Neg       | 3695      | 129.2       | 111-14-8;          |
| 823              | hexanoylcarnitine              | Lipid                  | Carnitine metabolism                                         | 32328          | LC/MS Pos       | 3174      | 260.2       | 6920-35-0;         |
| 1288             | hippurate                      | Xenobiotics            | Benzoate metabolism                                          | 15753          | LC/MS Neg       | 2136      | 178.1       | 495-69-2;          |
| 50               | histidine                      | Amino acid             | Histidine metabolism                                         | 59             | LC/MS Neg       | 757       | 154.1       | 5934-29-2;         |

**PATHWAY**

| <b>SORTORDER</b> | <b>BIOCHEMICAL NAME</b>                                                                        | <b>SUPER PATHWAY</b> | <b>SUB PATHWAY</b>                                           | <b>COMP ID</b> | <b>PLATFORM</b> | <b>RI</b> | <b>MASS</b> | <b>CAS</b>              |
|------------------|------------------------------------------------------------------------------------------------|----------------------|--------------------------------------------------------------|----------------|-----------------|-----------|-------------|-------------------------|
| 231              | homocysteine                                                                                   | Amino acid           | Cysteine, methionine, SAM, taurine metabolism                | 40266          | GC/MS           | 1648.2    | 234         | 454-29-5;               |
| 1585             | homostachydrine*                                                                               | Xenobiotics          | Food component/Plant                                         | 33009          | LC/MS Pos       | 1199      | 158.2       | 1195-94-4;              |
| 206              | hydroxyisovaleroyl carnitine                                                                   | Amino acid           | Valine, leucine and isoleucine                               | 35433          | LC/MS Pos       | 1683      | 262.1       | 99159-87-2;             |
| 1098             | hypoxanthine                                                                                   | Nucleotide           | Purine metabolism, (hypo)xanthine/inosine                    | 3127           | GC/MS           | 1759.2    | 265         | 68-94-0;                |
| 1101             | inosine 5'-monophosphate (IMP)                                                                 | Nucleotide           | Purine metabolism, (hypo)xanthine/inosine                    | 2133           | GC/MS           | 2254      | 315         | 4691-65-0;              |
| 527              | Isobar: fructose 1,6-diphosphate, glucose 1,6-diphosphate, myo-inositol 1,4 or 1,3-diphosphate | Carbohydrate         | Glycolysis, gluconeogenesis, pyruvate metabolism             | 36984          | LC/MS Neg       | 572       | 339         |                         |
| 561              | Isobar: ribulose 5-phosphate, xylulose 5-phosphate                                             | Carbohydrate         | Nucleotide sugars, pentose                                   | 37288          | GC/MS           | 1935      | 357.2       |                         |
| 496              | Isobar: sorbitol, mannitol                                                                     | Carbohydrate         | Fructose, mannose, galactose, starch, and sucrose metabolism | 33004          | LC/MS Pos       | 709       | 183.1       |                         |
| 200              | isobutyrylcarnitine                                                                            | Amino acid           | Valine, leucine and isoleucine                               | 33441          | LC/MS Pos       | 1941      | 232.2       | 25518-49-4;             |
| 180              | isoleucine                                                                                     | Amino acid           | Valine, leucine and isoleucine                               | 1125           | LC/MS Pos       | 1614      | 132.1       | 73-32-5;                |
| 478              | isomaltose                                                                                     | Carbohydrate         | Fructose, mannose, galactose, starch, and sucrose metabolism | 39777          | GC/MS           | 2221.8    | 204.1       | 499-40-1;               |
| 205              | isovalerylcarnitine                                                                            | Amino acid           | Valine, leucine and isoleucine                               | 34407          | LC/MS Pos       | 2533      | 246.2       |                         |
| 144              | kynurenine                                                                                     | Amino acid           | Tryptophan metabolism                                        | 15140          | LC/MS Pos       | 1902      | 209.1       | 2922-83-0;              |
| 536              | lactate                                                                                        | Carbohydrate         | Glycolysis, gluconeogenesis, pyruvate metabolism             | 527            | GC/MS           | 1102.8    | 116.9       | 79-33-4;                |
| 1018             | lathosterol                                                                                    | Lipid                | Sterol/Steroid                                               | 39864          | GC/MS           | 2337      | 255.2       | 80-99-9 ;               |
| 625              | laurate (12:0)                                                                                 | Lipid                | Medium chain fatty acid                                      | 1645           | LC/MS Neg       | 5288      | 199.3       | 143-07-7;               |
| 181              | leucine                                                                                        | Amino acid           | Valine, leucine and isoleucine                               | 60             | LC/MS Pos       | 1674      | 132.2       | 61-90-5;                |
| 604              | linoleate (18:2n6)                                                                             | Lipid                | Essential fatty acid                                         | 1105           | LC/MS Neg       | 5533      | 279.3       | 60-33-3;                |
| 608              | linolenate [alpha or gamma; (18:3n3 or 6)]                                                     | Lipid                | Essential fatty acid                                         | 34035          | LC/MS Neg       | 5450      | 277.3       |                         |
| 69               | lysine                                                                                         | Amino acid           | Lysine metabolism                                            | 1301           | GC/MS           | 1836.7    | 317.2       | 56-87-1;                |
| 598              | malate                                                                                         | Energy               | Krebs cycle                                                  | 1303           | GC/MS           | 1502      | 233         | 6915-15-7;              |
| 482              | maltose                                                                                        | Carbohydrate         | Fructose, mannose, galactose, starch, and sucrose metabolism | 15806          | GC/MS           | 2142.1    | 204.1       | 6363-53-7;              |
| 487              | mannose                                                                                        | Carbohydrate         | Fructose, mannose, galactose, starch, and sucrose metabolism | 584            | GC/MS           | 1753.5    | 203.9       | 3458-28-4;              |
| 489              | mannose-6-phosphate                                                                            | Carbohydrate         | Fructose, mannose, galactose, starch, and sucrose metabolism | 1470           | GC/MS           | 2035.9    | 387.2       | 70442-25-0;104872-94-8; |
| 635              | margarate (17:0)                                                                               | Lipid                | Long chain fatty acid                                        | 1121           | LC/MS Neg       | 5733      | 269.3       | 506-12-7;               |



**PATHWAY**

| <b>SORTORDER</b> | <b>BIOCHEMICAL NAME</b>                  | <b>SUPER PATHWAY</b>   | <b>SUB PATHWAY</b>               | <b>COMP ID</b> | <b>PLATFORM</b> | <b>RI</b> | <b>MASS</b> | <b>CAS</b>  |
|------------------|------------------------------------------|------------------------|----------------------------------|----------------|-----------------|-----------|-------------|-------------|
| 658              | mead acid (20:3n9)                       | Lipid                  | Long chain fatty acid            | 35174          | LC/MS Neg       | 5642      | 305.4       | 20590-32-3; |
| 225              | methionine                               | Amino acid             | Cysteine, methionine, SAM,       | 1302           | LC/MS Pos       | 1252      | 150.1       | 63-68-3;    |
| 890              | myo-inositol                             | Lipid                  | taurine metabolism               | 19934          | GC/MS           | 1924.9    | 217         | 87-89-8;    |
| 629              | myristate (14:0)                         | Lipid                  | Inositol metabolism              | 1365           | LC/MS Neg       | 5439      | 227.3       | 544-63-8;   |
| 630              | myristoleate (14:1n5)                    | Lipid                  | Long chain fatty acid            | 32418          | LC/MS Neg       | 5338      | 225.3       | 544-64-9 ;  |
| 1242.1           | N1-Methyl-2-pyridone-5-carboxamide       | Cofactors and vitamins | Long chain fatty acid            | 40469          | LC/MS Pos       | 1707.3    | 153.2       | 701-44-0;   |
| 75               | N-6-trimethyllysine                      | Amino acid             | Nicotinate and nicotinamide      | 1498           | LC/MS Pos       | 650       | 189.2       | 23284-33-5; |
| 4                | N-acetylglycine                          | Amino acid             | Lysine metabolism                | 27710          | GC/MS           | 1396.4    | 143.9       | 543-24-8;   |
| 227              | N-acetylmethionine                       | Amino acid             | Glycine, serine and threonine    | 1589           | LC/MS Neg       | 1805      | 190.1       | 65-82-7;    |
| 455              | N-acetylneuraminic acid                  | Carbohydrate           | Cysteine, methionine, SAM,       | 1592           | GC/MS           | 2074.9    | 245         | 131-48-6;   |
| 1221             | nicotinamide                             | Cofactors and vitamins | taurine metabolism               | 594            | LC/MS Pos       | 1267      | 123.1       | 98-92-0;    |
| 1224             | nicotinamide adenine dinucleotide (NAD+) | Cofactors and vitamins | Aminosugars metabolism           | 5278           | LC/MS Neg       | 1411      | 661.8       | 53-84-9;    |
| 825              | octanoylcarnitine                        | Lipid                  | Nicotinate and nicotinamide      | 33936          | LC/MS Pos       | 4100      | 288.3       | 3671-77-0;  |
| 639              | oleate (18:1n9)                          | Lipid                  | Carnitine metabolism             | 1359           | GC/MS           | 1984.4    | 339.2       | 112-80-1;   |
| 835              | oleoylcarnitine                          | Lipid                  | Long chain fatty acid            | 35160          | LC/MS Pos       | 5202      | 426.4       |             |
| 285              | ophthalmate                              | Amino acid             | Carnitine metabolism             | 34592          | LC/MS Pos       | 1457      | 290.1       | 495-27-2;   |
| 244              | ornithine                                | Amino acid             | Glutathione metabolism           | 1493           | GC/MS           | 1763.8    | 141.9       | 3184-13-2;  |
| 632              | palmitate (16:0)                         | Lipid                  | Urea cycle; arginine-, proline-, | 1336           | LC/MS Neg       | 5619      | 255.3       | 57-10-3;    |
| 633              | palmitoleate (16:1n7)                    | Lipid                  | Long chain fatty acid            | 33447          | LC/MS Neg       | 5477      | 253.3       | 373-49-9;   |
| 1004             | palmitoyl sphingomyelin                  | Lipid                  | Long chain fatty acid            | 37506          | GC/MS           | 2524      | 311.3       |             |
| 833              | palmitoylcarnitine                       | Lipid                  | Sphingolipid                     | 22189          | LC/MS Pos       | 5179      | 400.4       | 6865-14-1;  |
| 1243             | pantothenate                             | Cofactors and vitamins | Carnitine metabolism             | 1508           | LC/MS Pos       | 2218      | 220.1       | 137-08-6;   |
| 1613             | paraxanthine                             | Xenobiotics            | Pantothenate and CoA             | 18254          | LC/MS Pos       | 2444      | 181.2       | 611-59-6;   |
| 88               | p-cresol sulfate                         | Amino acid             | Xanthine metabolism              | 36103          | LC/MS Neg       | 2896      | 187.1       | 3233-57-7;  |
| 621              | pelargonate (9:0)                        | Lipid                  | Phenylalanine & tyrosine         | 12035          | LC/MS Neg       | 4847      | 157.2       | 112-05-0;   |
| 631              | pentadecanoate (15:0)                    | Lipid                  | Medium chain fatty acid          | 1361           | LC/MS Neg       | 5522      | 241.3       | 1002-84-2;  |
| 135              | phenol sulfate                           | Amino acid             | Long chain fatty acid            | 32553          | LC/MS Neg       | 2199      | 173.1       | 937-34-8;   |
| 128              | phenylacetylglutamine                    | Amino acid             | Phenylalanine & tyrosine         | 35126          | LC/MS Pos       | 2868      | 265.2       | 28047-15-6; |
| 83               | phenylalanine                            | Amino acid             | Phenylalanine & tyrosine         | 64             | LC/MS Pos       | 2056      | 166.1       | 63-91-2;    |
| 602              | phosphate                                | Energy                 | Phenylalanine & tyrosine         | 11438          | GC/MS           | 1307.7    | 298.9       | 7664-38-2 ; |
| 534              | phosphoenolpyruvate (PEP)                | Carbohydrate           | Oxidative phosphorylation        | 597            | GC/MS           | 1595.4    | 369         | 10526-80-4; |
| 877              | phosphoethanolamine                      | Lipid                  | Glycolysis, gluconeogenesis,     | 12102          | GC/MS           | 1577.3    | 299.1       | 1071-23-4;  |
|                  |                                          |                        | pyruvate metabolism              |                |                 |           |             |             |
|                  |                                          |                        | Glycerolipid metabolism          |                |                 |           |             |             |

**PATHWAY**

| <b>SORTORDER</b> | <b>BIOCHEMICAL NAME</b>      | <b>SUPER PATHWAY</b>   | <b>SUB PATHWAY</b>                                              | <b>COMP ID</b> | <b>PLATFORM</b> | <b>RI</b> | <b>MASS</b> | <b>CAS</b>                        |
|------------------|------------------------------|------------------------|-----------------------------------------------------------------|----------------|-----------------|-----------|-------------|-----------------------------------|
| 74               | pipecolate                   | Amino acid             | Lysine metabolism                                               | 1444           | LC/MS Pos       | 1120      | 130.1       | 4043-87-2;                        |
| 1531             | piperine                     | Xenobiotics            | Food component/Plant                                            | 33935          | LC/MS Pos       | 5136      | 286.2       | 94-62-2;                          |
| 246              | proline                      | Amino acid             | Urea cycle; arginine-, proline-,<br>Fatty acid metabolism (also | 1898           | LC/MS Pos       | 796       | 116.1       | 147-85-3;                         |
| 809              | propionylcarnitine           | Lipid                  | BCAA metabolism)                                                | 32452          | LC/MS Pos       | 1589      | 218.2       | 17298-37-2 ;                      |
| 1181             | pseudouridine                | Nucleotide             | Pyrimidine metabolism, uracil                                   | 33442          | LC/MS Neg       | 1104      | 243.1       | 1445-07-4;                        |
| 45               | pyroglutamine*               | Amino acid             | Glutamate metabolism                                            | 32672          | LC/MS Pos       | 764       | 129.2       |                                   |
| 603              | pyrophosphate (PPi)          | Energy                 | Oxidative phosphorylation<br>Glycolysis, gluconeogenesis,       | 2078           | GC/MS           | 1642.3    | 451         | 1466-09-3;                        |
| 535              | pyruvate                     | Carbohydrate           | pyruvate metabolism                                             | 599            | GC/MS           | 1130.6    | 217         | 127-17-3;                         |
| 1469             | ranitidine                   | Xenobiotics            | Drug                                                            | 38595          | LC/MS Pos       | 1967      | 315.1       | 66357-59-3;                       |
| 548              | ribitol                      | Carbohydrate           | Nucleotide sugars, pentose                                      | 15772          | GC/MS           | 1692.4    | 217         | 488-81-3;                         |
| 557              | ribose 5-phosphate           | Carbohydrate           | Nucleotide sugars, pentose                                      | 561            | GC/MS           | 1928.4    | 315.1       | 18265-46-8;108321-05-7;           |
| 559              | ribulose                     | Carbohydrate           | Nucleotide sugars, pentose                                      | 35855          | GC/MS           | 1662      | 306.1       | 488-84-6;                         |
| 224              | S-adenosylhomocysteine (SAH) | Amino acid             | Cysteine, methionine, SAM,<br>taurine metabolism                | 15948          | LC/MS Pos       | 1480      | 385.1       | 979-92-0;                         |
| 551              | sedoheptulose-7-phosphate    | Carbohydrate           | Nucleotide sugars, pentose                                      | 35649          | GC/MS           | 2070      | 691.35      | 2646-35-7;                        |
| 8                | serine                       | Amino acid             | Glycine, serine and threonine<br>Cysteine, methionine, SAM,     | 1648           | GC/MS           | 1389.1    | 204         | 56-45-1;                          |
| 216              | S-methylcysteine             | Amino acid             | taurine metabolism                                              | 39592          | GC/MS           | 1447.8    | 218.1       | 1187-84-4;                        |
| 281              | S-methylglutathione          | Amino acid             | Glutathione metabolism                                          | 33944          | LC/MS Pos       | 1610      | 322.1       | 2922-56-7;                        |
| 270              | spermidine                   | Amino acid             | Polyamine metabolism                                            | 485            | LC/MS Pos       | 533       | 146.2       | 124-20-9;                         |
| 1584             | stachydrine                  | Xenobiotics            | Food component/Plant                                            | 34384          | LC/MS Pos       | 860       | 144.1       | 4136-37-2;                        |
| 637              | stearate (18:0)              | Lipid                  | Long chain fatty acid                                           | 1358           | LC/MS Neg       | 5886      | 283.4       | 57-11-4;<br>85187-10-6;85187-10-6 |
| 1005             | stearoyl sphingomyelin       | Lipid                  | Sphingolipid                                                    | 19503          | GC/MS           | 2645      | 311.3 ;     |                                   |
| 834              | stearoylcarnitine            | Lipid                  | Carnitine metabolism                                            | 34409          | LC/MS Pos       | 5300      | 428.4       | 18822-91-8;                       |
| 591              | succinylcarnitine            | Energy                 | Krebs cycle                                                     | 37058          | LC/MS Pos       | 1401      | 262.1       |                                   |
| 1662             | terephthalic acid            | Xenobiotics            | Phthalate                                                       | 20684          | GC/MS           | 1746.7    | 295         | 100-21-0;                         |
| 1614             | theobromine                  | Xenobiotics            | Xanthine metabolism                                             | 18392          | LC/MS Pos       | 2136      | 181.1       | 83-67-0;                          |
| 1615             | theophylline                 | Xenobiotics            | Xanthine metabolism                                             | 18394          | LC/MS Pos       | 2495      | 181.1       | 58-55-9;                          |
| 549              | threitol                     | Carbohydrate           | Nucleotide sugars, pentose                                      | 35854          | GC/MS           | 1513      | 217.1       | 2418-52-2;                        |
| 1199             | threonate                    | Cofactors and vitamins | Ascorbate and aldarate                                          | 27738          | GC/MS           | 1560.7    | 292.1       | 70753-61-6;                       |
| 17               | threonine                    | Amino acid             | Glycine, serine and threonine                                   | 1284           | LC/MS Pos       | 713       | 120.1       | 72-19-5;                          |
| 252              | trans-4-hydroxyproline       | Amino acid             | Urea cycle; arginine-, proline-,                                | 32306          | LC/MS Pos       | 705       | 132.1       | 51-35-4;                          |

**PATHWAY**

| <b>SORTORDER</b> | <b>BIOCHEMICAL NAME</b>            | <b>SUPER PATHWAY</b>   | <b>SUB PATHWAY</b>                                           | <b>COMP ID</b> | <b>PLATFORM</b> | <b>RI</b> | <b>MASS</b> | <b>CAS</b>        |
|------------------|------------------------------------|------------------------|--------------------------------------------------------------|----------------|-----------------|-----------|-------------|-------------------|
| 501              | trehalose                          | Carbohydrate           | Fructose, mannose, galactose, starch, and sucrose metabolism | 15573          | GC/MS           | 2174.9    | 361.2       | 6138-23-4;        |
| 1242             | trigonelline (N'-methylnicotinate) | Cofactors and vitamins | Nicotinate and nicotinamide                                  | 32401          | LC/MS Pos       | 757       | 138.1       | 6138-41-6 ;       |
| 145              | tryptophan                         | Amino acid             | Tryptophan metabolism                                        | 54             | LC/MS Pos       | 2445      | 205.1       | 73-22-3;          |
| 151              | tryptophan betaine                 | Amino acid             | Tryptophan metabolism                                        | 37097          | LC/MS Pos       | 2464      | 247.1       | 20671-76-5;       |
| 99               | tyrosine                           | Amino acid             | Phenylalanine & tyrosine                                     | 1299           | LC/MS Pos       | 1516      | 182.1       | 60-18-4;          |
| 1149             | urate                              | Nucleotide             | Purine metabolism, urate                                     | 1604           | LC/MS Neg       | 769       | 167.1       | 69-93-2;120K5305; |
| 245              | urea                               | Amino acid             | Urea cycle; arginine-, proline-,                             | 1670           | GC/MS           | 1223.9    | 171         | 57-13-6;          |
| 1180             | uridine                            | Nucleotide             | Pyrimidine metabolism, uracil                                | 606            | LC/MS Neg       | 1467      | 243.1       | 58-96-8;          |
| 190              | valine                             | Amino acid             | Valine, leucine and isoleucine                               | 1649           | LC/MS Pos       | 1040      | 118.1       | 72-18-4;          |
| 565              | xylitol                            | Carbohydrate           | Nucleotide sugars, pentose                                   | 4966           | GC/MS           | 1677.6    | 307.2       | 87-99-0;          |
| 570              | xylonate                           | Carbohydrate           | Nucleotide sugars, pentose                                   | 35638          | GC/MS           | 1722      | 292         | 73686-31-7;       |
| 569              | xylose                             | Carbohydrate           | Nucleotide sugars, pentose                                   | 15835          | GC/MS           | 1723.9    | 204         | 609-06-3;         |

| PATHWAY                    |                                                   | SAMPLE NAME                  |                           | DARM-00001    | DARM-00002    | DARM-00003    | DARM-00004    | DARM-00005    | DARM-00006    |
|----------------------------|---------------------------------------------------|------------------------------|---------------------------|---------------|---------------|---------------|---------------|---------------|---------------|
| SORTORDER BIOCHEMICAL NAME |                                                   | KEGG                         | Group HMDB                | NHSCi 2003 T2 |
|                            |                                                   |                              |                           | 997731        | 997714        | 997743        | 997745        | 997721        | 997727        |
|                            |                                                   |                              |                           | 991346        | 991347        | 991348        | 991349        | 991350        | 991351        |
|                            |                                                   |                              |                           | NHSCi 2003 T2 | NHSCi 2003    | NHSCi 2003 T2 | NHSCi 2003 T2 | NHSCi 2003 T2 | NHSCi 2003    |
|                            |                                                   |                              |                           | D0            | T2 D7         | D14           | D21           | D28           | T1 D0         |
|                            |                                                   |                              |                           | 2003          | 2003          | 2003          | 2003          | 2003          | 2003          |
|                            |                                                   |                              |                           | T2 D0         | T2 D7         | T2 D14        | T2 D21        | T2 D28        | T1 D0         |
|                            |                                                   |                              |                           | 168.571       | 179.95        | 177.746       | 178.439       | 181.508       | 193.651       |
|                            |                                                   |                              |                           | T2 D0         | T2 D7         | T2 D14        | T2 D21        | T2 D28        | T1 D0         |
| 905                        | 1,2-propanediol                                   | <a href="#">C00717,C0291</a> | <a href="#">HMDB01881</a> | 0.093989      | 0.401140      | 0.845497      | 0.803099      | 0.965137      | 0.057564      |
| 532                        | 1,3-dihydroxyacetone                              | <a href="#">C00184</a>       | <a href="#">HMDB01882</a> | 0.940856      | 1.054696      | 1.442171      | 0.968040      | 0.782828      | 0.864449      |
| 515                        | 1,5-anhydroglucitol (1,5-AG)                      | <a href="#">C07326</a>       | <a href="#">HMDB02712</a> | 1.274625      | 1.032870      | 1.243681      | 1.023692      | 0.952805      | 0.975757      |
| 523                        | 1,6-anhydroglucose                                |                              | <a href="#">HMDB00640</a> | 1.238380      | 0.881507      | 0.829378      | 1.125241      | 1.036907      | 0.848109      |
| 636                        | 10-heptadecenoate (17:1n7)                        |                              |                           | 0.796267      | 1.104475      | 0.800071      | 0.822623      | 1.312559      | 0.741740      |
| 742                        | 13-methylmyristic acid                            |                              |                           | 0.522885      | 0.933119      | 1.053420      | 0.981142      | 1.309046      | 0.354055      |
| 744                        | 15-methylpalmitate (isobar with 2-                |                              |                           | 0.507116      | 1.167255      | 1.115206      | 0.996511      | 1.513833      | 0.533293      |
| 919                        | 1-arachidonoylglycerophosphoethanolamine*         |                              | <a href="#">HMDB11517</a> | 1.366868      | 1.576872      | 0.975005      | 0.951585      | 1.119687      | 0.889218      |
| 938                        | 1-linoleoylglycerophosphocholine                  | <a href="#">C04100</a>       |                           | 1.123556      | 1.370209      | 0.865878      | 0.894989      | 1.178065      | 0.933502      |
| 926                        | 1-myristoylglycerophosphocholine                  |                              | <a href="#">HMDB10379</a> | 0.416175      | 0.416175      | 0.427186      | 2.096404      | 0.698575      | 0.416175      |
| 936                        | 1-oleoylglycerophosphocholine                     |                              |                           | 0.178299      | 0.088629      | 0.185859      | 2.328282      | 1.163134      | 0.065166      |
| 915                        | 1-oleoylglycerophosphoethanolamine                |                              | <a href="#">HMDB11506</a> | 1.128128      | 1.252342      | 0.677501      | 0.738376      | 0.604000      | 0.830202      |
| 970                        | 1-palmitoylglycerol (1-monopalmitin)              |                              |                           | 0.440006      | 1.130496      | 1.076263      | 1.079450      | 0.922820      | 0.806115      |
| 929                        | 1-palmitoylglycerophosphocholine                  |                              |                           | 0.123750      | 0.125820      | 0.181043      | 2.182270      | 1.378549      | 0.089435      |
| 909                        | 1-palmitoylglycerophosphoethanolamine             |                              | <a href="#">HMDB11503</a> | 1.088055      | 1.385403      | 1.022251      | 1.199668      | 1.166131      | 0.775325      |
| 934                        | 1-stearoylglycerophosphocholine                   |                              |                           | 0.193808      | 0.120311      | 0.189197      | 1.838468      | 0.975918      | 0.098363      |
| 533                        | 2,3-diphosphoglycerate                            | <a href="#">C01159</a>       | <a href="#">HMDB01294</a> | 4.138947      | 1.554595      | 0.311838      | 0.074544      | 0.068895      | 4.676921      |
| 263                        | 2-aminobutyrate                                   | <a href="#">C02261</a>       | <a href="#">HMDB00650</a> | 0.629355      | 0.625711      | 0.769009      | 0.740084      | 0.580321      | 0.496951      |
| 945                        | 2-arachidonoylglycerophosphocholine*              |                              |                           | 0.185345      | 0.191578      | 0.185345      | 1.677087      | 0.185345      | 0.185345      |
| 920                        | 2-arachidonoylglycerophosphoethanolamine*         |                              |                           | 0.085869      | 0.067968      | 0.193090      | 1.575407      | 0.558041      | 0.064698      |
| 923                        | 2-docosahexaenoylglycerophosphoethanolamine*      |                              |                           | 0.174717      | 0.095479      | 0.253343      | 1.256097      | 0.748772      | 0.095479      |
| 922                        | 2-docosapentaenoylglycerophosphoethanolamine*     |                              |                           | 0.089145      | 0.134588      | 0.328537      | 0.987333      | 0.648933      | 0.089145      |
| 1360                       | 2-ethylhexanoate (isobar with 2-propylpentanoate) |                              |                           | 0.994715      | 1.127048      | 1.104864      | 0.500813      | 0.500813      | 1.506461      |
| 229                        | 2-hydroxybutyrate (AHB)                           | <a href="#">C05984</a>       | <a href="#">HMDB00008</a> | 0.962316      | 0.755261      | 0.873506      | 0.941181      | 0.735501      | 0.827288      |
| 714                        | 2-hydroxyglutarate                                | <a href="#">C02630</a>       | <a href="#">HMDB00606</a> | 0.569776      | 0.439821      | 0.993450      | 0.783255      | 1.070138      | 0.511422      |
| 706                        | 2-hydroxypalmitate                                |                              |                           | 0.970627      | 1.168187      | 1.022629      | 0.802534      | 1.235599      | 0.520610      |
| 939                        | 2-linoleoylglycerophosphocholine*                 |                              |                           | 0.229996      | 0.229996      | 0.229996      | 1.364130      | 0.769369      | 0.229996      |
| 202                        | 2-methylbutyrylcarnitine                          |                              | <a href="#">HMDB00378</a> | 0.854777      | 0.913628      | 0.903239      | 0.726604      | 1.014510      | 1.023880      |
| 937                        | 2-oleoylglycerophosphocholine*                    |                              |                           | 0.191712      | 0.191712      | 0.191712      | 1.298431      | 0.666356      | 0.191712      |
| 930                        | 2-palmitoylglycerophosphocholine*                 |                              |                           | 0.086420      | 0.086420      | 0.143326      | 2.052493      | 0.832508      | 0.086420      |

| PATHWAY | SORTORDER | BIOCHEMICAL NAME                         | KEGG                   | SAMPLE NAME<br>CLIENT IDENTIFIER<br>SAMPLE ID<br>PARENT SAMPLE ID<br>ACTUAL<br>UNIT<br>COND DAY<br>BRADFORD PROTEIN | DARM-00001    | DARM-00002    | DARM-00003    | DARM-00004      | DARM-00005      | DARM-00006    |
|---------|-----------|------------------------------------------|------------------------|---------------------------------------------------------------------------------------------------------------------|---------------|---------------|---------------|-----------------|-----------------|---------------|
|         |           |                                          |                        |                                                                                                                     | NHSCi 2003 T2 | NHSCi 2003 T2 | NHSCi 2003 T2 | NHSCi 2003 T2 I | NHSCi 2003 T2 C | NHSCi 2003 T1 |
|         |           |                                          |                        |                                                                                                                     | 997731        | 997714        | 997743        | 997745          | 997721          | 997727        |
|         |           |                                          |                        |                                                                                                                     | 991346        | 991347        | 991348        | 991349          | 991350          | 991351        |
|         |           |                                          |                        |                                                                                                                     | NHSCi 2003 T2 | NHSCi 2003    | NHSCi 2003 T2 | NHSCi 2003 T2   | NHSCi 2003 T2   | NHSCi 2003    |
|         |           |                                          |                        |                                                                                                                     | D0            | T2 D7         | D14           | D21             | D28             | T1 D0         |
|         |           |                                          |                        |                                                                                                                     | 2003          | 2003          | 2003          | 2003            | 2003            | 2003          |
|         |           |                                          |                        |                                                                                                                     | T2 D0         | T2 D7         | T2 D14        | T2 D21          | T2 D28          | T1 D0         |
|         |           |                                          |                        |                                                                                                                     | 168.571       | 179.95        | 177.746       | 178.439         | 181.508         | 193.651       |
|         |           |                                          |                        |                                                                                                                     | T2 D0         | T2 D7         | T2 D14        | T2 D21          | T2 D28          | T1 D0         |
|         |           |                                          |                        |                                                                                                                     | 0.572527      | 0.142354      | 0.142354      | 1.940494        | 0.940968        | 0.142354      |
|         |           | 935 2-stearoylglycerophosphocholine*     |                        |                                                                                                                     | 0.572527      | 0.142354      | 0.142354      | 1.940494        | 0.940968        | 0.142354      |
|         |           | 821 3-dehydrocarnitine*                  | <a href="#">C02636</a> | <a href="#">HMDB12154</a>                                                                                           | 1.076919      | 0.924933      | 0.976938      | 1.033407        | 1.013969        | 0.910554      |
|         |           | 170 3-indoxyl sulfate                    |                        | <a href="#">HMDB00682</a>                                                                                           | 1.712419      | 1.255098      | 1.445637      | 1.530830        | 1.540111        | 1.229409      |
|         |           | 172 3-methyl-2-oxobutyrate               | <a href="#">C00141</a> | <a href="#">HMDB00019</a>                                                                                           | 1.075324      | 1.155141      | 1.309651      | 0.984266        | 0.854008        | 0.403093      |
|         |           | 173 3-methyl-2-oxovalerate               | <a href="#">C00671</a> | <a href="#">HMDB03736</a>                                                                                           | 1.043241      | 0.978637      | 1.246686      | 1.215393        | 1.035149        | 0.592511      |
|         |           | 529 3-phosphoglycerate                   | <a href="#">C00597</a> | <a href="#">HMDB00807</a>                                                                                           | 2.374659      | 1.117753      | 0.844108      | 0.429645        | 0.515288        | 3.533836      |
|         |           | 193 4-methyl-2-oxopentanoate             | <a href="#">C00233</a> | <a href="#">HMDB00695</a>                                                                                           | 1.156508      | 1.141842      | 1.396480      | 1.094258        | 1.006348        | 0.588241      |
|         |           | 266 5-methylthioadenosine (MTA)          | <a href="#">C00170</a> | <a href="#">HMDB01173</a>                                                                                           | 0.449465      | 0.754355      | 1.231740      | 1.271453        | 1.074281        | 0.315499      |
|         |           | 282 5-oxoproline                         | <a href="#">C01879</a> | <a href="#">HMDB00267</a>                                                                                           | 0.165879      | 0.565747      | 0.968489      | 1.322304        | 1.692893        | 0.157881      |
|         |           | 545 6-phosphogluconate                   | <a href="#">C00345</a> | <a href="#">HMDB01316</a>                                                                                           | 2.695675      | 1.212385      | 1.018991      | 0.981009        | 0.734737        | 0.598150      |
|         |           | 1024 7-beta-hydroxycholesterol           | <a href="#">C03594</a> | <a href="#">HMDB06119</a>                                                                                           | 1.329854      | 1.093651      | 1.080549      | 1.516603        | 1.004637        | 0.363094      |
|         |           | 712.5 9,10-epoxyoctadec-12(Z)-enoic acid | <a href="#">C14825</a> | <a href="#">HMDB04701</a>                                                                                           | 0.113908      | 0.601718      | 0.964045      | 0.972183        | 1.082745        | 0.042011      |
|         |           | 672 9,10-epoxystearate                   |                        |                                                                                                                     | 0.044171      | 0.773191      | 0.950427      | 0.993213        | 1.196794        | 0.030000      |
|         |           | 822 acetylcarnitine                      | <a href="#">C02571</a> | <a href="#">HMDB00201</a>                                                                                           | 1.126087      | 0.881193      | 0.906692      | 0.820706        | 0.867728        | 0.955412      |
|         |           | 601 acetylphosphate                      | <a href="#">C00227</a> | <a href="#">HMDB01494</a>                                                                                           | 1.029339      | 0.963066      | 1.009106      | 1.075334        | 0.815509        | 0.684729      |
|         |           | 1105 adenine                             | <a href="#">C00147</a> | <a href="#">HMDB00034</a>                                                                                           | 1.395489      | 1.026574      | 0.783973      | 0.632388        | 0.507260        | 1.193781      |
|         |           | 1106 adenosine                           | <a href="#">C00212</a> | <a href="#">HMDB00050</a>                                                                                           | 0.449049      | 0.638120      | 0.679083      | 0.923837        | 1.393348        | 0.984137      |
|         |           | 1116 adenosine 5'-diphosphate (ADP)      | <a href="#">C00008</a> | <a href="#">HMDB01341</a>                                                                                           | 1.390162      | 1.383267      | 0.897989      | 0.996594        | 1.189003        | 1.444857      |
|         |           | 1232 adenosine 5'diphosphoribose         | <a href="#">C00301</a> | <a href="#">HMDB01178</a>                                                                                           | 1.267679      | 1.058207      | 1.103961      | 1.020994        | 0.993634        | 1.093751      |
|         |           | 1114 adenosine 5'-monophosphate (AMP)    | <a href="#">C00020</a> | <a href="#">HMDB00045</a>                                                                                           | 0.715566      | 0.966972      | 0.935805      | 0.904164        | 1.404471        | 1.066409      |
|         |           | 665 adrenate (22:4n6)                    | <a href="#">C16527</a> | <a href="#">HMDB02226</a>                                                                                           | 0.486736      | 1.902288      | 0.889997      | 1.304018        | 1.230291        | 0.369250      |
|         |           | 27 alanine                               | <a href="#">C00041</a> | <a href="#">HMDB00161</a>                                                                                           | 0.912282      | 0.809323      | 1.048377      | 1.073185        | 1.000614        | 0.669428      |
|         |           | 1150 allantoin                           | <a href="#">C02350</a> | <a href="#">HMDB00462</a>                                                                                           | 1.731724      | 1.144911      | 1.216153      | 0.726424        | 1.250808        | 1.063616      |
|         |           | 179 alpha-hydroxyisocaproate             | <a href="#">C03264</a> | <a href="#">HMDB00746</a>                                                                                           | 0.292412      | 0.292412      | 0.380921      | 0.832896        | 1.423024        | 0.292412      |
|         |           | 198 alpha-hydroxyisovalerate             |                        | <a href="#">HMDB00407</a>                                                                                           | 0.829316      | 0.644653      | 0.847666      | 0.966061        | 1.251663        | 0.824864      |
|         |           | 1266 alpha-tocopherol                    | <a href="#">C02477</a> | <a href="#">HMDB01893</a>                                                                                           | 1.419880      | 1.212748      | 1.440249      | 1.473337        | 1.096169        | 0.986832      |
|         |           | 1034 androsterone sulfate                | <a href="#">C00523</a> | <a href="#">HMDB02759</a>                                                                                           | 1.050185      | 0.757073      | 0.922578      | 0.880415        | 0.788449        | 0.847041      |
|         |           | 566 arabinose                            | <a href="#">C00181</a> | <a href="#">HMDB00646</a>                                                                                           | 1.066035      | 0.792435      | 1.187882      | 0.910478        | 0.983765        | 0.851556      |
|         |           | 546 arabitol                             | <a href="#">C00474</a> | <a href="#">HMDB01851</a>                                                                                           | 1.062259      | 0.791483      | 1.076288      | 1.042036        | 0.831019        | 0.870610      |
|         |           | 1202 arabonate                           |                        | <a href="#">HMDB00539</a>                                                                                           | 1.088700      | 0.833567      | 0.776673      | 1.036803        | 1.000331        | 1.008680      |
|         |           | 659 arachidonate (20:4n6)                | <a href="#">C00219</a> | <a href="#">HMDB01043</a>                                                                                           | 1.089373      | 1.462770      | 0.833837      | 0.994535        | 1.825296        | 0.976271      |
|         |           | 241 arginine                             | <a href="#">C00062</a> | <a href="#">HMDB00517</a>                                                                                           | 1.194589      | 0.559059      | 0.964406      | 0.785271        | 1.480900        | 0.795852      |
|         |           | 25 asparagine                            | <a href="#">C00152</a> | <a href="#">HMDB00168</a>                                                                                           | 1.141829      | 0.913989      | 0.966493      | 0.928296        | 0.674187        | 0.904378      |
|         |           | 24 aspartate                             | <a href="#">C00049</a> | <a href="#">HMDB00191</a>                                                                                           | 1.214478      | 1.001431      | 1.277627      | 1.401880        | 1.213226        | 1.085541      |

| PATHWAY | SORTORDER | BIOCHEMICAL NAME                   | KEGG                   | SAMPLE NAME<br>CLIENT IDENTIFIER<br>SAMPLE ID<br>PARENT SAMPLE ID<br>ACTUAL<br>UNIT<br>COND DAY<br>BRADFORD PROTEIN | DARM-00001    | DARM-00002    | DARM-00003    | DARM-00004    | DARM-00005    | DARM-00006    |
|---------|-----------|------------------------------------|------------------------|---------------------------------------------------------------------------------------------------------------------|---------------|---------------|---------------|---------------|---------------|---------------|
|         |           |                                    |                        |                                                                                                                     | NHSCi 2003 T2 | NHSCi 2003 T1 |
|         |           |                                    | Group HMDB             |                                                                                                                     | 997731        | 997714        | 997743        | 997745        | 997721        | 997727        |
|         |           |                                    |                        |                                                                                                                     | 991346        | 991347        | 991348        | 991349        | 991350        | 991351        |
|         |           |                                    |                        |                                                                                                                     | NHSCi 2003 T2 | NHSCi 2003    | NHSCi 2003 T2 | NHSCi 2003 T2 | NHSCi 2003 T2 | NHSCi 2003    |
|         |           |                                    |                        |                                                                                                                     | D0            | T2 D7         | D14           | D21           | D28           | T1 D0         |
|         |           |                                    |                        |                                                                                                                     | 2003          | 2003          | 2003          | 2003          | 2003          | 2003          |
|         |           |                                    |                        |                                                                                                                     | T2 D0         | T2 D7         | T2 D14        | T2 D21        | T2 D28        | T1 D0         |
|         |           |                                    |                        |                                                                                                                     | 168.571       | 179.95        | 177.746       | 178.439       | 181.508       | 193.651       |
|         |           |                                    |                        |                                                                                                                     | T2 D0         | T2 D7         | T2 D14        | T2 D21        | T2 D28        | T1 D0         |
|         | 721       | azelate (nonanedioate)             | <a href="#">C08261</a> | <a href="#">HMDB00784</a>                                                                                           | 0.245042      | 0.595599      | 1.073954      | 1.371530      | 1.768580      | 0.230852      |
|         | 26        | beta-alanine                       | <a href="#">C00099</a> | <a href="#">HMDB00056</a>                                                                                           | 0.900905      | 0.941909      | 0.951472      | 0.931881      | 0.632220      | 0.490479      |
|         | 7         | beta-hydroxypyruvate               | <a href="#">C00168</a> | <a href="#">HMDB01352</a>                                                                                           | 1.209736      | 0.795568      | 1.049309      | 0.666684      | 1.002750      | 0.899862      |
|         | 22        | betaine                            |                        | <a href="#">HMDB00043</a>                                                                                           | 0.794116      | 0.667522      | 0.834714      | 0.823645      | 0.728270      | 0.793730      |
|         | 1057      | beta-sitosterol                    | <a href="#">C01753</a> | <a href="#">HMDB00852</a>                                                                                           | 0.570500      | 0.349092      | 0.349092      | 0.770647      | 0.357752      | 0.525103      |
|         | 1216      | biliverdin                         | <a href="#">C00500</a> | <a href="#">HMDB01008</a>                                                                                           | 0.522259      | 0.522259      | 0.522259      | 1.166977      | 0.625312      | 0.551372      |
|         | 811       | butyrylcarnitine                   |                        |                                                                                                                     | 1.043461      | 0.828255      | 1.079063      | 0.752751      | 0.598389      | 0.999344      |
|         | 1612      | caffeine                           | <a href="#">C07481</a> | <a href="#">HMDB01847</a>                                                                                           | 0.999314      | 0.822552      | 0.914438      | 0.875849      | 0.830690      | 0.855801      |
|         | 1059      | campesterol                        | <a href="#">C01789</a> | <a href="#">HMDB02869</a>                                                                                           | 1.094301      | 0.478278      | 1.000000      | 0.776528      | 0.469755      | 1.104270      |
|         | 622       | caprate (10:0)                     | <a href="#">C01571</a> | <a href="#">HMDB00511</a>                                                                                           | 0.569170      | 0.980594      | 1.284473      | 1.071891      | 0.992421      | 0.430953      |
|         | 618       | caproate (6:0)                     | <a href="#">C01585</a> | <a href="#">HMDB00535</a>                                                                                           | 1.581021      | 1.065844      | 1.189805      | 0.838839      | 0.788805      | 1.557801      |
|         | 620       | caprylate (8:0)                    | <a href="#">C06423</a> | <a href="#">HMDB00482</a>                                                                                           | 0.389680      | 0.838546      | 1.716807      | 1.182484      | 1.354962      | 0.814413      |
|         | 820       | carnitine                          |                        |                                                                                                                     | 1.021174      | 0.823129      | 0.955729      | 0.927607      | 0.920565      | 0.796767      |
|         | 1300      | catechol sulfate                   | <a href="#">C00090</a> |                                                                                                                     | 1.165133      | 0.995666      | 1.101118      | 1.008261      | 0.969035      | 0.965027      |
|         | 164       | C-glycosyltryptophan*              |                        |                                                                                                                     | 1.035688      | 0.857870      | 0.917760      | 0.918208      | 0.924370      | 0.936158      |
|         | 1020      | cholesterol                        | <a href="#">C00187</a> | <a href="#">HMDB00067</a>                                                                                           | 1.010012      | 0.884618      | 1.005086      | 1.018152      | 0.909531      | 0.831067      |
|         | 881       | choline                            |                        |                                                                                                                     | 0.457805      | 0.519088      | 0.510624      | 0.566353      | 0.597473      | 0.483461      |
|         | 582       | cis-aconitate                      | <a href="#">C00417</a> | <a href="#">HMDB00072</a>                                                                                           | 0.647851      | 1.005747      | 1.064489      | 1.053564      | 1.170318      | 0.638058      |
|         | 641       | cis-vaccenate (18:1n7)             | <a href="#">C08367</a> |                                                                                                                     | 1.639499      | 1.022769      | 0.551118      | 0.725897      | 1.009816      | 0.563160      |
|         | 579       | citrate                            | <a href="#">C00158</a> | <a href="#">HMDB00094</a>                                                                                           | 1.455945      | 1.109140      | 1.137108      | 1.011044      | 0.881536      | 1.223980      |
|         | 248       | citrulline                         | <a href="#">C00327</a> | <a href="#">HMDB00904</a>                                                                                           | 1.152402      | 1.054559      | 1.163516      | 1.053651      | 1.189787      | 1.168537      |
|         | 259       | creatine                           | <a href="#">C00300</a> | <a href="#">HMDB00064</a>                                                                                           | 0.993535      | 0.891023      | 0.906751      | 0.890437      | 0.862782      | 0.841125      |
|         | 260       | creatinine                         | <a href="#">C00791</a> | <a href="#">HMDB00562</a>                                                                                           | 0.865685      | 0.968933      | 0.930878      | 0.998699      | 0.767573      | 0.859310      |
|         | 213       | cysteine                           | <a href="#">C00097</a> | <a href="#">HMDB00574</a>                                                                                           | 0.776267      | 0.747842      | 0.990776      | 1.865414      | 1.711294      | 0.448327      |
|         | 819       | deoxycarnitine                     | <a href="#">C01181</a> | <a href="#">HMDB01161</a>                                                                                           | 1.040861      | 0.850303      | 0.972640      | 0.851995      | 0.906019      | 0.955015      |
|         | 655       | dihomo-linoleate (20:2n6)          | <a href="#">C16525</a> |                                                                                                                     | 0.685223      | 1.012127      | 0.748911      | 0.760888      | 1.377872      | 0.545316      |
|         | 609       | dihomo-linolenate (20:3n3 or n6)   | <a href="#">C03242</a> | <a href="#">HMDB02925</a>                                                                                           | 1.113018      | 1.398940      | 0.936092      | 1.103451      | 1.945842      | 0.973365      |
|         | 531       | dihydroxyacetone phosphate (DHAP)  | <a href="#">C00111</a> | <a href="#">HMDB01473</a>                                                                                           | 0.385793      | 1.056641      | 0.320859      | 0.622944      | 0.239333      | 44.147339     |
|         | 3         | dimethylglycine                    | <a href="#">C01026</a> | <a href="#">HMDB00092</a>                                                                                           | 0.993914      | 0.967463      | 0.870135      | 1.538440      | 0.832408      | 0.620077      |
|         | 613       | docosahexaenoate (DHA; 22:6n3)     | <a href="#">C06429</a> | <a href="#">HMDB02183</a>                                                                                           | 0.794951      | 1.239805      | 0.934690      | 1.240075      | 2.147000      | 0.747328      |
|         | 611       | docosapentaenoate (n3 DPA; 22:5n3) | <a href="#">C16513</a> | <a href="#">HMDB01976</a>                                                                                           | 0.658557      | 0.882298      | 0.966259      | 1.000485      | 1.707321      | 0.615944      |
|         | 610       | eicosapentaenoate (EPA; 20:5n3)    | <a href="#">C06428</a> | <a href="#">HMDB01999</a>                                                                                           | 1.015692      | 1.335128      | 0.760620      | 1.162985      | 1.596989      | 0.959060      |

| PATHWAY   |                                | KEGG                   | Group | HMDDB                     | DARM-00001    | DARM-00002    | DARM-00003    | DARM-00004    | DARM-00005    | DARM-00006    |
|-----------|--------------------------------|------------------------|-------|---------------------------|---------------|---------------|---------------|---------------|---------------|---------------|
| SORTORDER | BIOCHEMICAL NAME               |                        |       |                           | NHSCi 2003 T2 | NHSCi 2003 T1 |
|           |                                |                        |       |                           | 997731        | 997714        | 997743        | 997745        | 997721        | 997727        |
|           |                                |                        |       |                           | 991346        | 991347        | 991348        | 991349        | 991350        | 991351        |
|           |                                |                        |       |                           | NHSCi 2003 T2 | NHSCi 2003    | NHSCi 2003 T2 | NHSCi 2003 T2 | NHSCi 2003 T2 | NHSCi 2003    |
|           |                                |                        |       |                           | D0            | T2 D7         | D14           | D21           | D28           | T1 D0         |
|           |                                |                        |       |                           | 2003          | 2003          | 2003          | 2003          | 2003          | 2003          |
|           |                                |                        |       |                           | T2 D0         | T2 D7         | T2 D14        | T2 D21        | T2 D28        | T1 D0         |
|           |                                |                        |       |                           | 168.571       | 179.95        | 177.746       | 178.439       | 181.508       | 193.651       |
|           |                                |                        |       |                           | T2 D0         | T2 D7         | T2 D14        | T2 D21        | T2 D28        | T1 D0         |
| 1565      | ergothioneine                  | <a href="#">C05570</a> |       | <a href="#">HMDB03045</a> | 0.835187      | 0.776632      | 0.736140      | 0.680171      | 0.755074      | 0.733015      |
| 735       | erucamide                      |                        |       |                           | 0.527467      | 0.703786      | 0.741920      | 1.776732      | 0.727185      | 0.427592      |
| 1632      | erythritol                     | <a href="#">C00503</a> |       | <a href="#">HMDB02994</a> | 0.653841      | 0.720044      | 1.045748      | 1.259075      | 1.305161      | 0.610686      |
| 453       | erythronate*                   |                        |       | <a href="#">HMDB00613</a> | 0.689475      | 0.775144      | 0.950500      | 1.032711      | 0.960244      | 0.598603      |
| 876       | ethanolamine                   | <a href="#">C00189</a> |       | <a href="#">HMDB00149</a> | 0.549032      | 1.054160      | 1.158327      | 1.052428      | 0.824532      | 0.585552      |
| 472       | fructose                       | <a href="#">C00095</a> |       | <a href="#">HMDB00660</a> | 0.919175      | 0.835912      | 1.072641      | 1.142352      | 1.017204      | 0.646730      |
| 524       | fructose-6-phosphate           | <a href="#">C05345</a> |       | <a href="#">HMDB00124</a> | 1.048181      | 1.013336      | 1.010773      | 0.788031      | 0.832102      | 0.481086      |
| 594       | fumarate                       | <a href="#">C00122</a> |       | <a href="#">HMDB00134</a> | 0.699296      | 0.705909      | 0.653853      | 0.714851      | 0.987097      | 0.691151      |
| 404       | gamma-glutamylleucine          |                        |       | <a href="#">HMDB11171</a> | 1.263046      | 0.956229      | 0.935706      | 1.260536      | 0.935957      | 0.960392      |
| 521       | glucose                        | <a href="#">C00293</a> |       | <a href="#">HMDB00122</a> | 1.100613      | 0.894063      | 0.999561      | 0.975802      | 0.956884      | 0.914791      |
| 519       | glucose-6-phosphate (G6P)      | <a href="#">C00668</a> |       | <a href="#">HMDB01401</a> | 1.101610      | 0.939321      | 1.137970      | 0.666145      | 0.877208      | 0.075532      |
| 39        | glutamate                      | <a href="#">C00025</a> |       | <a href="#">HMDB03339</a> | 0.968093      | 0.679776      | 0.890358      | 0.846317      | 0.889278      | 0.957911      |
| 44        | glutamine                      | <a href="#">C00064</a> |       | <a href="#">HMDB00641</a> | 1.363576      | 1.198844      | 1.033190      | 1.000241      | 0.820056      | 1.274925      |
| 80        | glutaroyl carnitine            |                        |       | <a href="#">HMDB13130</a> | 1.225842      | 0.848082      | 0.561030      | 0.561030      | 0.561030      | 0.667386      |
| 283       | glutathione, oxidized (GSSG)   | <a href="#">C00127</a> |       | <a href="#">HMDB03337</a> | 1.440573      | 1.002163      | 1.010711      | 0.997837      | 0.719527      | 1.269335      |
| 280       | glutathione, reduced (GSH)     | <a href="#">C00051</a> |       | <a href="#">HMDB00125</a> | 1.231496      | 0.756086      | 1.150949      | 1.009302      | 0.735478      | 1.070710      |
| 517       | glycerate                      | <a href="#">C00258</a> |       | <a href="#">HMDB00139</a> | 0.454046      | 0.579083      | 0.765712      | 0.950256      | 0.917643      | 0.462533      |
| 882       | glycerol 3-phosphate (G3P)     | <a href="#">C00093</a> |       | <a href="#">HMDB00126</a> | 1.063160      | 0.882808      | 0.923560      | 0.666260      | 0.866868      | 3.677948      |
| 883       | glycerophosphorylcholine (GPC) | <a href="#">C00670</a> |       | <a href="#">HMDB00086</a> | 1.263060      | 0.997264      | 0.967765      | 0.977253      | 1.072449      | 0.927551      |
| 1         | glycine                        | <a href="#">C00037</a> |       | <a href="#">HMDB00123</a> | 0.784409      | 0.701784      | 1.029387      | 1.267401      | 1.440536      | 0.613590      |
| 851       | glycochenodeoxycholate         | <a href="#">C05466</a> |       | <a href="#">HMDB00637</a> | 0.361362      | 0.333840      | 0.307484      | 0.268684      | 0.332119      | 0.306612      |
| 840       | glycocholate                   | <a href="#">C01921</a> |       | <a href="#">HMDB00138</a> | 0.132858      | 0.084103      | 0.167936      | 0.151510      | 0.079564      | 0.141719      |
| 849       | glycodeoxycholate              | <a href="#">C05464</a> |       | <a href="#">HMDB00631</a> | 0.199279      | 0.199279      | 0.199279      | 0.331379      | 0.293438      | 0.199279      |
| 1318      | glycolate (hydroxyacetate)     | <a href="#">C00160</a> |       | <a href="#">HMDB00115</a> | 1.078136      | 0.940027      | 1.117940      | 1.144272      | 0.930150      | 0.838677      |
| 1128      | guanosine                      | <a href="#">C00387</a> |       | <a href="#">HMDB00133</a> | 1.295695      | 0.984093      | 1.233850      | 1.022857      | 1.131049      | 1.155844      |
| 1212      | heme*                          |                        |       |                           | 0.954588      | 0.264021      | 0.482578      | 3.174177      | 0.788115      | 0.405137      |
| 619       | heptanoate (7:0)               | <a href="#">C17714</a> |       | <a href="#">HMDB00666</a> | 0.800282      | 1.170681      | 1.666856      | 0.736404      | 0.944057      | 1.156421      |
| 823       | hexanoylcarnitine              | <a href="#">C01585</a> |       | <a href="#">HMDB00705</a> | 1.978526      | 0.904615      | 1.150736      | 0.889297      | 1.434068      | 1.615980      |
| 1288      | hippurate                      | <a href="#">C01586</a> |       | <a href="#">HMDB00714</a> | 1.133840      | 0.956417      | 1.012884      | 1.016509      | 1.064161      | 0.921184      |
| 50        | histidine                      | <a href="#">C00135</a> |       | <a href="#">HMDB00177</a> | 0.898835      | 0.912690      | 0.798434      | 1.230160      | 1.035040      | 1.171108      |

| PATHWAY<br>SORTORDER | BIOCHEMICAL NAME                                       | KEGG                         | SAMPLE NAME<br>CLIENT IDENTIFIER<br>SAMPLE ID<br>PARENT SAMPLE ID<br>ACTUAL<br>UNIT<br>COND DAY<br>BRADFORD PROTEIN<br><del>Group HMDB</del> | DARM-00001    | DARM-00002    | DARM-00003    | DARM-00004    | DARM-00005    | DARM-00006    |
|----------------------|--------------------------------------------------------|------------------------------|----------------------------------------------------------------------------------------------------------------------------------------------|---------------|---------------|---------------|---------------|---------------|---------------|
|                      |                                                        |                              |                                                                                                                                              | NHSCi 2003 T2 | NHSCi 2003 T1 |
|                      |                                                        |                              |                                                                                                                                              | 997731        | 997714        | 997743        | 997745        | 997721        | 997727        |
|                      |                                                        |                              |                                                                                                                                              | 991346        | 991347        | 991348        | 991349        | 991350        | 991351        |
|                      |                                                        |                              |                                                                                                                                              | NHSCi 2003 T2 | NHSCi 2003    | NHSCi 2003 T2 | NHSCi 2003 T2 | NHSCi 2003 T2 | NHSCi 2003    |
|                      |                                                        |                              |                                                                                                                                              | D0            | T2 D7         | D14           | D21           | D28           | T1 D0         |
|                      |                                                        |                              |                                                                                                                                              | 2003          | 2003          | 2003          | 2003          | 2003          | 2003          |
|                      |                                                        |                              |                                                                                                                                              | T2 D0         | T2 D7         | T2 D14        | T2 D21        | T2 D28        | T1 D0         |
|                      |                                                        |                              |                                                                                                                                              | 168.571       | 179.95        | 177.746       | 178.439       | 181.508       | 193.651       |
|                      |                                                        |                              |                                                                                                                                              | T2 D0         | T2 D7         | T2 D14        | T2 D21        | T2 D28        | T1 D0         |
|                      | 231 homocysteine                                       | <a href="#">C00155</a>       | <a href="#">HMDB00742</a>                                                                                                                    | 0.262199      | 0.375152      | 0.738484      | 1.163485      | 0.992255      | 0.281478      |
|                      | 1585 homostachydrine*                                  | <a href="#">C08283</a>       |                                                                                                                                              | 1.288188      | 1.026078      | 1.179888      | 1.013992      | 0.950084      | 1.155035      |
|                      | 206 hydroxyisovaleroyl carnitine                       |                              |                                                                                                                                              | 0.724878      | 0.560873      | 0.745301      | 0.673846      | 0.719616      | 0.657910      |
|                      | 1098 hypoxanthine                                      | <a href="#">C00262</a>       | <a href="#">HMDB00157</a>                                                                                                                    | 0.097602      | 0.112866      | 0.430679      | 1.318815      | 2.170569      | 0.121817      |
|                      | 1101 inosine 5'-monophosphate (IMP)                    | <a href="#">C00130</a>       | <a href="#">HMDB00175</a>                                                                                                                    | 0.377696      | 0.646349      | 0.924064      | 0.598793      | 0.655219      | 0.258697      |
|                      | Isobar: fructose 1,6-diphosphate, glucose 1,6-         |                              |                                                                                                                                              |               |               |               |               |               |               |
|                      | 527 diphosphate, myo-inositol 1,4 or 1,3-diphosphate   |                              |                                                                                                                                              | 1.302519      | 1.218696      | 1.200162      | 0.988566      | 1.116699      | 5.111154      |
|                      | 561 Isobar: ribulose 5-phosphate, xylulose 5-phosphate |                              |                                                                                                                                              | 0.995202      | 1.301341      | 0.617255      | 1.004798      | 0.494205      | 4.960977      |
|                      | 496 Isobar: sorbitol, mannitol                         | <a href="#">C00392_C0172</a> | <a href="#">HMDB00247</a>                                                                                                                    | 1.054596      | 0.864582      | 1.083342      | 1.049648      | 0.908134      | 0.967651      |
|                      | 200 isobutyrylcarnitine                                |                              |                                                                                                                                              | 1.162361      | 0.961702      | 0.975136      | 0.902758      | 0.844705      | 1.106286      |
|                      | 180 isoleucine                                         | <a href="#">C00407</a>       | <a href="#">HMDB00172</a>                                                                                                                    | 0.987145      | 0.794828      | 0.999866      | 0.997684      | 0.979558      | 0.917794      |
|                      | 478 isomaltose                                         | <a href="#">C00252</a>       | <a href="#">HMDB02923</a>                                                                                                                    | 1.211123      | 0.783606      | 1.193456      | 0.998921      | 0.795175      | 0.705296      |
|                      | 205 isovalerylcarnitine                                |                              | <a href="#">HMDB00688</a>                                                                                                                    | 0.957936      | 0.743246      | 0.925570      | 0.903648      | 1.195788      | 0.896412      |
|                      | 144 kynurenine                                         | <a href="#">C00328</a>       | <a href="#">HMDB00684</a>                                                                                                                    | 0.929605      | 0.825327      | 1.077796      | 1.036477      | 0.788213      | 0.979446      |
|                      | 536 lactate                                            | <a href="#">C00186</a>       | <a href="#">HMDB00190</a>                                                                                                                    | 0.184047      | 0.503474      | 0.921057      | 1.116432      | 1.160568      | 0.223943      |
|                      | 1018 lathosterol                                       | <a href="#">C01189</a>       | <a href="#">HMDB01170</a>                                                                                                                    | 1.020373      | 1.053193      | 1.504318      | 0.994947      | 0.965564      | 0.808696      |
|                      | 625 laurate (12:0)                                     | <a href="#">C02679</a>       | <a href="#">HMDB00638</a>                                                                                                                    | 0.924744      | 1.004352      | 1.058769      | 1.097257      | 1.170584      | 0.873382      |
|                      | 181 leucine                                            | <a href="#">C00123</a>       | <a href="#">HMDB00687</a>                                                                                                                    | 0.903947      | 0.780766      | 0.928915      | 0.995498      | 0.979677      | 0.818525      |
|                      | 604 linoleate (18:2n6)                                 | <a href="#">C01595</a>       | <a href="#">HMDB00673</a>                                                                                                                    | 0.661104      | 0.997258      | 0.698140      | 0.785193      | 1.275626      | 0.614669      |
|                      | 608 linolenate [alpha or gamma; (18:3n3 or 6)]         | <a href="#">C06427</a>       | <a href="#">HMDB01388</a>                                                                                                                    | 0.829378      | 1.153856      | 0.922793      | 0.898516      | 1.253571      | 0.859021      |
|                      | 69 lysine                                              | <a href="#">C00047</a>       | <a href="#">HMDB00182</a>                                                                                                                    | 0.858728      | 0.927582      | 0.968109      | 1.543772      | 0.699000      | 0.692248      |
|                      | 598 malate                                             | <a href="#">C00149</a>       | <a href="#">HMDB00156</a>                                                                                                                    | 0.509580      | 0.674466      | 0.693725      | 0.748274      | 0.831729      | 0.399579      |
|                      | 482 maltose                                            | <a href="#">C00208</a>       | <a href="#">HMDB00163</a>                                                                                                                    | 1.046492      | 0.857338      | 1.018061      | 1.008771      | 0.872358      | 0.833263      |
|                      | 487 mannose                                            | <a href="#">C00159</a>       | <a href="#">HMDB00169</a>                                                                                                                    | 1.205248      | 0.960470      | 1.022661      | 1.056647      | 0.941239      | 0.969336      |
|                      | 489 mannose-6-phosphate                                | <a href="#">C00275</a>       | <a href="#">HMDB01078</a>                                                                                                                    | 0.974867      | 1.156702      | 1.150395      | 0.925892      | 0.846344      | 0.465820      |
|                      | 635 margarate (17:0)                                   |                              | <a href="#">HMDB02259</a>                                                                                                                    | 0.676142      | 1.020723      | 1.034499      | 0.813727      | 1.223798      | 0.607831      |



| PATHWAY                    |                                          |                        | SAMPLE NAME               | DARM-00001    | DARM-00002    | DARM-00003    | DARM-00004    | DARM-00005    | DARM-00006    |
|----------------------------|------------------------------------------|------------------------|---------------------------|---------------|---------------|---------------|---------------|---------------|---------------|
| SORTORDER BIOCHEMICAL NAME |                                          |                        | CLIENT IDENTIFIER         | NHSCi 2003 T2 |
| KEGG                       |                                          |                        | SAMPLE ID                 | 997731        | 997714        | 997743        | 997745        | 997721        | 997727        |
|                            |                                          |                        | PARENT SAMPLE ID          | 991346        | 991347        | 991348        | 991349        | 991350        | 991351        |
|                            |                                          |                        | ACTUAL                    | NHSCi 2003 T2 | NHSCi 2003    | NHSCi 2003 T2 | NHSCi 2003 T2 | NHSCi 2003 T2 | NHSCi 2003    |
|                            |                                          |                        | UNIT                      | D0            | T2 D7         | D14           | D21           | D28           | T1 D0         |
|                            |                                          |                        | COND DAY                  | 2003          | 2003          | 2003          | 2003          | 2003          | 2003          |
|                            |                                          |                        | BRADFORD PROTEIN          | T2 D0         | T2 D7         | T2 D14        | T2 D21        | T2 D28        | T1 D0         |
|                            |                                          |                        | Group HMDB                | 168.571       | 179.95        | 177.746       | 178.439       | 181.508       | 193.651       |
|                            |                                          |                        |                           | T2 D0         | T2 D7         | T2 D14        | T2 D21        | T2 D28        | T1 D0         |
| 658                        | mead acid (20:3n9)                       |                        | <a href="#">HMDB10378</a> | 0.982527      | 1.217503      | 0.593670      | 0.703125      | 2.025167      | 1.028821      |
| 225                        | methionine                               | <a href="#">C00073</a> | <a href="#">HMDB00696</a> | 1.507191      | 1.001162      | 0.998838      | 0.745071      | 0.681953      | 1.412109      |
| 890                        | myo-inositol                             | <a href="#">C00137</a> | <a href="#">HMDB00211</a> | 0.837540      | 0.810258      | 0.999258      | 0.918080      | 0.721814      | 0.839143      |
| 629                        | myristate (14:0)                         | <a href="#">C06424</a> | <a href="#">HMDB00806</a> | 0.566010      | 1.030228      | 1.161382      | 0.963253      | 1.151818      | 0.459958      |
| 630                        | myristoleate (14:1n5)                    | <a href="#">C08322</a> | <a href="#">HMDB02000</a> | 0.625324      | 0.658534      | 0.493142      | 0.572631      | 1.380087      | 0.493142      |
| 1242.1                     | N1-Methyl-2-pyridone-5-carboxamide       | <a href="#">C05842</a> | <a href="#">HMDB04193</a> | 1.564949      | 1.428541      | 1.499827      | 1.002102      | 1.075192      | 1.136819      |
| 75                         | N-6-trimethyllysine                      |                        |                           | 0.660943      | 0.585348      | 0.822405      | 0.705275      | 0.566193      | 0.487751      |
| 4                          | N-acetylglycine                          |                        | <a href="#">HMDB00532</a> | 1.175280      | 0.811402      | 1.542740      | 1.046386      | 0.686973      | 0.942530      |
| 227                        | N-acetylmethionine                       | <a href="#">C02712</a> | <a href="#">HMDB11745</a> | 0.800527      | 0.903428      | 0.800527      | 0.800527      | 0.832440      | 0.959118      |
| 455                        | N-acetylneuraminic acid                  | <a href="#">C00270</a> | <a href="#">HMDB00230</a> | 0.357287      | 0.538860      | 0.978609      | 1.308516      | 0.936821      | 0.454634      |
| 1221                       | nicotinamide                             | <a href="#">C00153</a> | <a href="#">HMDB01406</a> | 0.938633      | 0.969041      | 1.091274      | 1.309828      | 0.970032      | 0.853524      |
| 1224                       | nicotinamide adenine dinucleotide (NAD+) | <a href="#">C00003</a> | <a href="#">HMDB00902</a> | 1.075162      | 0.847859      | 1.002085      | 2.084172      | 0.967308      | 1.302876      |
| 825                        | octanoylcarnitine                        |                        |                           | 0.849712      | 0.775525      | 0.952219      | 0.981920      | 0.921344      | 0.653453      |
| 639                        | oleate (18:1n9)                          | <a href="#">C00712</a> | <a href="#">HMDB00207</a> | 0.714866      | 0.960577      | 0.673818      | 0.930919      | 0.924696      | 0.621447      |
| 835                        | oleoylcarnitine                          |                        | <a href="#">HMDB05065</a> | 0.111343      | 0.103863      | 0.127639      | 1.159799      | 0.495649      | 0.072123      |
| 285                        | ophthalmate                              |                        | <a href="#">HMDB05765</a> | 2.351470      | 0.412000      | 0.252181      | 0.252181      | 0.252181      | 2.213700      |
| 244                        | ornithine                                | <a href="#">C00077</a> | <a href="#">HMDB03374</a> | 1.044312      | 0.973956      | 1.077857      | 1.075137      | 0.831313      | 0.846538      |
| 632                        | palmitate (16:0)                         | <a href="#">C00249</a> | <a href="#">HMDB00220</a> | 0.731859      | 1.097799      | 0.929711      | 0.866888      | 1.214564      | 0.645327      |
| 633                        | palmitoleate (16:1n7)                    | <a href="#">C08362</a> | <a href="#">HMDB03229</a> | 0.746184      | 1.082150      | 0.814432      | 0.771888      | 1.206358      | 0.662766      |
| 1004                       | palmitoyl sphingomyelin                  |                        |                           | 1.009978      | 0.864505      | 0.988393      | 0.996593      | 0.873151      | 0.810514      |
| 833                        | palmitoylcarnitine                       |                        |                           | 0.138978      | 0.059115      | 0.189457      | 1.064403      | 0.519661      | 0.177110      |
| 1243                       | pantothenate                             | <a href="#">C00864</a> | <a href="#">HMDB00210</a> | 1.016767      | 0.897232      | 0.956114      | 0.869183      | 0.899775      | 0.885358      |
| 1613                       | paraxanthine                             | <a href="#">C13747</a> | <a href="#">HMDB01860</a> | 1.061880      | 0.851574      | 1.126766      | 1.157693      | 0.944562      | 0.920510      |
| 88                         | p-cresol sulfate                         | <a href="#">C01468</a> |                           | 1.418439      | 1.199775      | 1.288073      | 1.182466      | 1.271776      | 1.204341      |
| 621                        | pelargonate (9:0)                        | <a href="#">C01601</a> | <a href="#">HMDB00847</a> | 0.601400      | 0.968215      | 1.817404      | 1.196536      | 1.274407      | 0.696637      |
| 631                        | pentadecanoate (15:0)                    | <a href="#">C16537</a> | <a href="#">HMDB00826</a> | 0.765394      | 1.116842      | 1.018417      | 0.960782      | 1.283807      | 0.646841      |
| 135                        | phenol sulfate                           | <a href="#">C02180</a> |                           | 1.194608      | 1.062706      | 1.078474      | 0.990487      | 0.960798      | 1.065396      |
| 128                        | phenylacetylglutamine                    | <a href="#">C05597</a> | <a href="#">HMDB06344</a> | 1.447771      | 1.224528      | 1.323932      | 1.434381      | 1.291844      | 1.190817      |
| 83                         | phenylalanine                            | <a href="#">C00079</a> | <a href="#">HMDB00159</a> | 0.984373      | 0.855271      | 1.137403      | 1.113927      | 1.009291      | 0.897514      |
| 602                        | phosphate                                | <a href="#">C00009</a> | <a href="#">HMDB01429</a> | 0.960793      | 0.920399      | 1.138694      | 1.133536      | 1.040180      | 0.668616      |
| 534                        | phosphoenolpyruvate (PEP)                | <a href="#">C00074</a> | <a href="#">HMDB00263</a> | 4.317937      | 1.447414      | 0.490799      | 0.200344      | 0.336918      | 4.201588      |
| 877                        | phosphoethanolamine                      | <a href="#">C00346</a> | <a href="#">HMDB00224</a> | 1.074507      | 0.875807      | 1.225685      | 0.593700      | 0.786465      | 1.080196      |

| PATHWAY | SORTORDER | BIOCHEMICAL NAME             | KEGG                   | SAMPLE NAME<br>CLIENT IDENTIFIER<br>SAMPLE ID<br>PARENT SAMPLE ID<br>ACTUAL<br>UNIT<br>COND DAY<br>BRADFORD PROTEIN | DARM-00001    | DARM-00002    | DARM-00003    | DARM-00004    | DARM-00005    | DARM-00006    |
|---------|-----------|------------------------------|------------------------|---------------------------------------------------------------------------------------------------------------------|---------------|---------------|---------------|---------------|---------------|---------------|
|         |           |                              |                        |                                                                                                                     | NHSCi 2003 T2 | NHSCi 2003 T1 |
|         |           |                              | Group HMDB             |                                                                                                                     | 997731        | 997714        | 997743        | 997745        | 997721        | 997727        |
|         |           |                              |                        |                                                                                                                     | 991346        | 991347        | 991348        | 991349        | 991350        | 991351        |
|         |           |                              |                        |                                                                                                                     | NHSCi 2003 T2 | NHSCi 2003    | NHSCi 2003 T2 | NHSCi 2003 T2 | NHSCi 2003 T2 | NHSCi 2003    |
|         |           |                              |                        |                                                                                                                     | D0            | T2 D7         | D14           | D21           | D28           | T1 D0         |
|         |           |                              |                        |                                                                                                                     | 2003          | 2003          | 2003          | 2003          | 2003          | 2003          |
|         |           |                              |                        |                                                                                                                     | T2 D0         | T2 D7         | T2 D14        | T2 D21        | T2 D28        | T1 D0         |
|         |           |                              |                        |                                                                                                                     | 168.571       | 179.95        | 177.746       | 178.439       | 181.508       | 193.651       |
|         |           |                              |                        |                                                                                                                     | T2 D0         | T2 D7         | T2 D14        | T2 D21        | T2 D28        | T1 D0         |
|         | 74        | pipecolate                   | <a href="#">C00408</a> | <a href="#">HMDB00070</a>                                                                                           | 1.102910      | 0.889577      | 0.822084      | 1.139414      | 0.897131      | 0.781710      |
|         | 1531      | piperine                     | <a href="#">C03882</a> |                                                                                                                     | 1.071879      | 1.101751      | 0.655875      | 0.834467      | 0.708170      | 0.919699      |
|         | 246       | proline                      | <a href="#">C00148</a> | <a href="#">HMDB00162</a>                                                                                           | 0.915947      | 1.028549      | 0.939995      | 0.915745      | 1.005936      | 0.795303      |
|         | 809       | propionylcarnitine           | <a href="#">C03017</a> | <a href="#">HMDB00824</a>                                                                                           | 0.998129      | 0.797025      | 0.812016      | 0.676241      | 0.714173      | 0.811286      |
|         | 1181      | pseudouridine                | <a href="#">C02067</a> | <a href="#">HMDB00767</a>                                                                                           | 1.581253      | 1.282899      | 1.098750      | 0.982422      | 1.162511      | 0.761125      |
|         | 45        | pyroglutamine*               |                        |                                                                                                                     | 0.737929      | 0.547121      | 0.420202      | 0.448679      | 0.439148      | 0.374612      |
|         | 603       | pyrophosphate (PPi)          | <a href="#">C00013</a> | <a href="#">HMDB00250</a>                                                                                           | 1.962899      | 1.222331      | 1.303311      | 1.020032      | 0.385049      | 1.594598      |
|         | 535       | pyruvate                     | <a href="#">C00022</a> | <a href="#">HMDB00243</a>                                                                                           | 1.118042      | 1.969399      | 2.094208      | 0.810124      | 0.505324      | 0.056113      |
|         | 1469      | ranitidine                   | <a href="#">D00422</a> | <a href="#">HMDB01930</a>                                                                                           | 1.036527      | 0.947381      | 0.948476      | 0.866407      | 1.039385      | 0.879676      |
|         | 548       | ribitol                      | <a href="#">C00474</a> | <a href="#">HMDB00508</a>                                                                                           | 0.877273      | 0.711653      | 1.151194      | 0.741076      | 1.118788      | 0.798867      |
|         | 557       | ribose 5-phosphate           | <a href="#">C00117</a> | <a href="#">HMDB00618</a>                                                                                           | 1.367338      | 1.252771      | 0.933570      | 0.814745      | 0.672063      | 2.233142      |
|         | 559       | ribulose                     | <a href="#">C00309</a> | <a href="#">HMDB00621,HMDB03371</a>                                                                                 | 0.838750      | 0.240496      | 0.895948      | 1.227931      | 0.240496      | 1.386884      |
|         | 224       | S-adenosylhomocysteine (SAH) | <a href="#">C00021</a> | <a href="#">HMDB00939</a>                                                                                           | 0.722516      | 0.933287      | 1.079622      | 0.889291      | 1.162824      | 0.618320      |
|         | 551       | sedoheptulose-7-phosphate    | <a href="#">C05382</a> | <a href="#">HMDB01068</a>                                                                                           | 1.205791      | 0.370716      | 2.626636      | 1.788112      | 0.461430      | 0.074096      |
|         | 8         | serine                       | <a href="#">C00065</a> | <a href="#">HMDB03406</a>                                                                                           | 0.897376      | 0.826694      | 0.933398      | 0.972309      | 0.894736      | 0.740037      |
|         | 216       | S-methylcysteine             |                        | <a href="#">HMDB02108</a>                                                                                           | 1.546979      | 1.514817      | 1.615735      | 1.747664      | 1.551145      | 1.112397      |
|         | 281       | S-methylglutathione          | <a href="#">C11347</a> |                                                                                                                     | 1.405068      | 0.824551      | 0.931198      | 1.286469      | 0.997110      | 1.238279      |
|         | 270       | spermidine                   | <a href="#">C00315</a> | <a href="#">HMDB01257</a>                                                                                           | 0.779236      | 0.685966      | 0.903530      | 0.851891      | 0.852453      | 0.671940      |
|         | 1584      | stachydrine                  | <a href="#">C10172</a> | <a href="#">HMDB04827</a>                                                                                           | 0.120808      | 0.078570      | 0.119219      | 0.126803      | 0.132770      | 0.112926      |
|         | 637       | stearate (18:0)              | <a href="#">C01530</a> | <a href="#">HMDB00827</a>                                                                                           | 0.713078      | 1.129057      | 0.998799      | 0.875504      | 1.219120      | 0.621096      |
|         | 1005      | stearoyl sphingomyelin       | <a href="#">C00550</a> | <a href="#">HMDB01348</a>                                                                                           | 1.277456      | 0.910619      | 0.973538      | 1.056922      | 1.077678      | 0.872663      |
|         | 834       | stearoylcarnitine            |                        | <a href="#">HMDB00848</a>                                                                                           | 0.056108      | 0.056108      | 0.217910      | 1.000000      | 0.481530      | 0.056108      |
|         | 591       | succinylcarnitine            |                        |                                                                                                                     | 0.711793      | 0.675913      | 0.753938      | 0.736396      | 0.814040      | 0.610032      |
|         | 1662      | terephthalic acid            | <a href="#">C06337</a> | <a href="#">HMDB02428</a>                                                                                           | 0.915167      | 0.570385      | 0.624059      | 0.686443      | 0.631354      | 0.559301      |
|         | 1614      | theobromine                  | <a href="#">C07480</a> | <a href="#">HMDB02825</a>                                                                                           | 1.350359      | 1.111060      | 1.426622      | 1.053549      | 1.151325      | 1.199873      |
|         | 1615      | theophylline                 | <a href="#">C07130</a> | <a href="#">HMDB01889</a>                                                                                           | 1.171008      | 1.650268      | 1.072864      | 0.617853      | 0.957177      | 1.036258      |
|         | 549       | threitol                     | <a href="#">C16884</a> | <a href="#">HMDB04136</a>                                                                                           | 0.956725      | 0.969312      | 1.242202      | 1.281014      | 1.140570      | 0.888563      |
|         | 1199      | threonate                    | <a href="#">C01620</a> | <a href="#">HMDB00943</a>                                                                                           | 1.069841      | 0.883127      | 1.058853      | 0.951108      | 1.015710      | 0.710274      |
|         | 17        | threonine                    | <a href="#">C00188</a> | <a href="#">HMDB00167</a>                                                                                           | 0.908850      | 0.834363      | 0.872882      | 0.864093      | 0.942662      | 0.772937      |
|         | 252       | trans-4-hydroxyproline       | <a href="#">C01157</a> | <a href="#">HMDB00725</a>                                                                                           | 1.248799      | 1.083158      | 1.092664      | 1.275759      | 1.098446      | 1.147332      |

| PATHWAY<br>SORTORDER | BIOCHEMICAL NAME                   | KEGG                          | Group HMDB                | SAMPLE NAME       | DARM-00001    | DARM-00002    | DARM-00003      | DARM-00004      | DARM-00005      | DARM-00006    |
|----------------------|------------------------------------|-------------------------------|---------------------------|-------------------|---------------|---------------|-----------------|-----------------|-----------------|---------------|
|                      |                                    |                               |                           | CLIENT IDENTIFIER | NHSCi 2003 T2 | NHSCi 2003 T2 | NHSCi 2003 T2 D | NHSCi 2003 T2 I | NHSCi 2003 T2 C | NHSCi 2003 T1 |
|                      |                                    |                               |                           | SAMPLE ID         | 997731        | 997714        | 997743          | 997745          | 997721          | 997727        |
|                      |                                    |                               |                           | PARENT SAMPLE ID  | 991346        | 991347        | 991348          | 991349          | 991350          | 991351        |
|                      |                                    |                               |                           | ACTUAL            | NHSCi 2003 T2 | NHSCi 2003    | NHSCi 2003 T2   | NHSCi 2003 T2   | NHSCi 2003 T2   | NHSCi 2003    |
|                      |                                    |                               |                           | UNIT              | D0            | T2 D7         | D14             | D21             | D28             | T1 D0         |
|                      |                                    |                               |                           | COND DAY          | 2003          | 2003          | 2003            | 2003            | 2003            | 2003          |
|                      |                                    |                               |                           | BRADFORD PROTEIN  | T2 D0         | T2 D7         | T2 D14          | T2 D21          | T2 D28          | T1 D0         |
|                      |                                    |                               |                           |                   | 168.571       | 179.95        | 177.746         | 178.439         | 181.508         | 193.651       |
|                      |                                    |                               |                           |                   | T2 D0         | T2 D7         | T2 D14          | T2 D21          | T2 D28          | T1 D0         |
| 501                  | trehalose                          | <a href="#">C01083</a>        | <a href="#">HMDB00975</a> |                   | 0.108147      | 0.610965      | 1.012624        | 1.338255        | 1.046230        | 0.104490      |
| 1242                 | trigonelline (N'-methylnicotinate) |                               | <a href="#">HMDB00875</a> |                   | 0.711049      | 0.623862      | 0.645081        | 0.663676        | 0.636632        | 0.647216      |
| 145                  | tryptophan                         | <a href="#">C00078</a>        | <a href="#">HMDB00929</a> |                   | 1.031677      | 0.788144      | 1.074157        | 1.014829        | 0.943093        | 0.835153      |
| 151                  | tryptophan betaine                 | <a href="#">C09213</a>        |                           |                   | 0.562156      | 0.508877      | 0.532573        | 0.496551        | 0.519666        | 0.491686      |
| 99                   | tyrosine                           | <a href="#">C00082</a>        | <a href="#">HMDB00158</a> |                   | 0.869281      | 0.713008      | 0.991781        | 0.926936        | 0.952006        | 0.804564      |
| 1149                 | urate                              | <a href="#">C00366</a>        | <a href="#">HMDB00289</a> |                   | 1.110170      | 1.013792      | 0.972913        | 0.874034        | 1.018883        | 1.003583      |
| 245                  | urea                               | <a href="#">C00086</a>        | <a href="#">HMDB00294</a> |                   | 1.147243      | 0.896619      | 1.154535        | 1.091534        | 1.008057        | 0.943828      |
| 1180                 | uridine                            | <a href="#">C00299</a>        | <a href="#">HMDB00296</a> |                   | 0.424213      | 0.632935      | 0.685118        | 0.767251        | 1.012166        | 0.640234      |
| 190                  | valine                             | <a href="#">C00183</a>        | <a href="#">HMDB00883</a> |                   | 0.932442      | 0.820464      | 1.000926        | 0.940639        | 0.923756        | 0.870393      |
| 565                  | xylitol                            | <a href="#">C00379</a>        | <a href="#">HMDB00568</a> |                   | 0.127693      | 0.127693      | 0.127693        | 0.127693        | 0.127693        | 0.127693      |
| 570                  | xylonate                           | <a href="#">C00502,C05411</a> |                           |                   | 0.763576      | 0.711723      | 1.095722        | 0.987384        | 1.346684        | 1.242916      |
| 569                  | xylose                             | <a href="#">C00181</a>        | <a href="#">HMDB00098</a> |                   | 1.034657      | 0.405368      | 0.513480        | 0.708854        | 0.895573        | 0.405368      |

| PATHWAY | SORTORDER | BIOCHEMICAL NAME                                       | DARM-00007           | DARM-00008           | DARM-00009           | DARM-00010           | DARM-00011          | DARM-00012          | DARM-00013          | DARM-00014          | DARM-00015          |
|---------|-----------|--------------------------------------------------------|----------------------|----------------------|----------------------|----------------------|---------------------|---------------------|---------------------|---------------------|---------------------|
|         |           |                                                        | NHSCi 2003 T1 997730 | NHSCi 2003 T1 997747 | NHSCi 2003 T1 997713 | NHSCi 2003 T1 997751 | NHSCi 2003 C 997716 | NHSCi 2003 C 997752 | NHSCi 2003 C 997719 | NHSCi 2003 C 997724 | NHSCi 2003 C 997729 |
|         |           |                                                        | 991352               | 991353               | 991354               | 991355               | 991356              | 991357              | 991358              | 991359              | 991360              |
|         |           |                                                        | NHSCi 2003 T1 D7     | NHSCi 2003 T1 D14    | NHSCi 2003 T1 D21    | NHSCi 2003 T1 D28    | NHSCi 2003 C D0     | NHSCi 2003 C D7     | NHSCi 2003 C D14    | NHSCi 2003 C D21    | NHSCi 2003 C D28    |
|         |           |                                                        | 164.122              | 167.3                | 157.075              | 174.895              | 193.847             | 179.605             | 175.15              | 167.535             | 175.121             |
|         |           |                                                        | T1 D7                | T1 D14               | T1 D21               | T1 D28               | C D0                | C D7                | C D14               | C D21               | C D28               |
|         |           | 905 1,2-propanediol                                    | 0.579393             | 0.881442             | 1.419568             | 1.047499             | 0.071779            | 0.575987            | 1.250987            | 1.276408            | 1.584491            |
|         |           | 532 1,3-dihydroxyacetone                               | 1.005572             | 1.295784             | 1.681924             | 1.351797             | 1.032546            | 1.019166            | 1.076962            | 0.931657            | 0.894764            |
|         |           | 515 1,5-anhydroglucitol (1,5-AG)                       | 1.222268             | 0.995142             | 1.772193             | 0.905907             | 0.939960            | 1.191738            | 1.611112            | 1.080594            | 1.318376            |
|         |           | 523 1,6-anhydroglucose                                 | 1.307081             | 1.303914             | 1.421176             | 0.985249             | 1.515766            | 0.938190            | 1.525099            | 1.005262            | 1.176818            |
|         |           | 636 10-heptadecenoate (17:1n7)                         | 1.011971             | 0.988029             | 1.229869             | 0.837718             | 0.528442            | 0.673333            | 0.775389            | 1.304893            | 1.228168            |
|         |           | 742 13-methylmyristic acid                             | 0.956273             | 1.215136             | 1.490650             | 1.156663             | 0.509429            | 0.889129            | 1.082770            | 1.589390            | 1.395014            |
|         |           | 744 15-methylpalmitate (isobar with 2-                 | 0.844457             | 1.103403             | 1.382409             | 0.940191             | 0.479921            | 0.760123            | 1.123751            | 1.434375            | 1.459824            |
|         |           | 919 1-arachidonoylglycerophosphoethanolamine*          | 1.049916             | 1.087377             | 1.555467             | 0.769220             | 1.983977            | 0.986731            | 1.217806            | 0.958717            | 0.771485            |
|         |           | 938 1-linoleoylglycerophosphocholine                   | 0.967220             | 0.999949             | 2.227720             | 0.865688             | 1.499100            | 0.934622            | 1.310714            | 1.121451            | 0.950420            |
|         |           | 926 1-myristoylglycerophosphocholine                   | 0.417624             | 2.906419             | 2.670861             | 5.384758             | 0.416175            | 0.653119            | 0.789458            | 1.000000            | 1.522096            |
|         |           | 936 1-oleoylglycerophosphocholine                      | 0.544009             | 1.726474             | 2.647978             | 4.037094             | 0.065166            | 0.231035            | 0.749125            | 1.000000            | 1.798584            |
|         |           | 915 1-oleoylglycerophosphoethanolamine                 | 1.339954             | 0.322900             | 1.875242             | 0.580694             | 1.350258            | 1.229704            | 1.343753            | 1.298771            | 0.879791            |
|         |           | 970 1-palmitoylglycerol (1-monopalmitin)               | 0.829122             | 1.253203             | 0.977707             | 1.119067             | 0.916368            | 1.889740            | 0.672489            | 0.949738            | 0.829713            |
|         |           | 929 1-palmitoylglycerophosphocholine                   | 0.630176             | 1.556422             | 2.942561             | 3.136941             | 0.083969            | 0.250438            | 0.862993            | 1.152353            | 2.071989            |
|         |           | 909 1-palmitoylglycerophosphoethanolamine              | 1.204767             | 0.843694             | 2.424624             | 0.931373             | 2.389639            | 1.260441            | 1.505796            | 1.279065            | 1.265982            |
|         |           | 934 1-stearoylglycerophosphocholine                    | 0.473487             | 2.894309             | 2.215544             | 4.321889             | 0.091058            | 0.296757            | 0.689606            | 1.011835            | 1.583255            |
|         |           | 533 2,3-diphosphoglycerate                             | 4.972904             | 3.857553             | 2.788181             | 0.746330             | 2.814633            | 1.589136            | 0.482986            | 0.151241            | 0.155468            |
|         |           | 263 2-aminobutyrate                                    | 0.753116             | 0.750416             | 1.001038             | 0.748359             | 0.659673            | 0.681075            | 0.863260            | 0.683240            | 0.748353            |
|         |           | 945 2-arachidonoylglycerophosphocholine*               | 0.432689             | 2.601587             | 1.158283             | 4.677377             | 0.185345            | 0.359102            | 0.344467            | 0.546725            | 1.114457            |
|         |           | 920 2-arachidonoylglycerophosphoethanolamine*          | 0.361928             | 2.168727             | 1.141330             | 2.855072             | 0.060242            | 0.424004            | 0.288778            | 0.554670            | 1.112031            |
|         |           | 923 2-docosahexaenoylglycerophosphoethanolamine*       | 0.475139             | 2.511314             | 1.644739             | 3.717151             | 0.095479            | 0.257399            | 0.363824            | 0.614259            | 1.123485            |
|         |           | 922 2-docosapentaenoylglycerophosphoethanolamine*      | 0.525743             | 2.345279             | 1.100081             | 2.505825             | 0.089145            | 0.178370            | 0.293410            | 0.514275            | 1.054004            |
|         |           | 1360 2-ethylhexanoate (isobar with 2-propylpentanoate) | 1.474724             | 1.173821             | 1.084554             | 0.500813             | 1.516810            | 1.212806            | 1.074970            | 1.491817            | 0.909125            |
|         |           | 229 2-hydroxybutyrate (AHB)                            | 0.978164             | 0.924134             | 1.223178             | 0.826119             | 0.836621            | 0.844041            | 1.039988            | 0.963358            | 0.906011            |
|         |           | 714 2-hydroxyglutarate                                 | 1.006550             | 0.980514             | 1.675851             | 1.358799             | 0.423536            | 0.731857            | 0.903798            | 0.905771            | 0.942990            |
|         |           | 706 2-hydroxypalmitate                                 | 0.898758             | 1.032398             | 2.810047             | 0.972744             | 1.280125            | 0.891865            | 1.796636            | 1.076808            | 0.985628            |
|         |           | 939 2-linoleoylglycerophosphocholine*                  | 0.229996             | 1.856319             | 0.855317             | 2.430508             | 0.229996            | 0.229996            | 0.229996            | 0.743047            | 1.114907            |
|         |           | 202 2-methylbutyrylcarnitine                           | 0.879397             | 0.547851             | 1.138514             | 0.723311             | 1.025134            | 0.990521            | 1.124479            | 0.883279            | 1.063017            |
|         |           | 937 2-oleoylglycerophosphocholine*                     | 0.327408             | 1.306436             | 1.338380             | 2.664556             | 0.191712            | 0.268938            | 0.565977            | 0.692410            | 1.011297            |
|         |           | 930 2-palmitoylglycerophosphocholine*                  | 0.368877             | 2.858268             | 1.790289             | 4.241271             | 0.096665            | 0.336862            | 0.531351            | 0.878770            | 1.318114            |

|                  | DARM-00007              | DARM-00008                         | DARM-00009        | DARM-00010        | DARM-00011      | DARM-00012      | DARM-00013       | DARM-00014       | DARM-00015       |          |          |
|------------------|-------------------------|------------------------------------|-------------------|-------------------|-----------------|-----------------|------------------|------------------|------------------|----------|----------|
|                  | NHSci 2003 T1           | NHSci 2003 T1                      | NHSci 2003 T1     | NHSci 2003 T1     | NHSci 2003 C    | NHSci 2003 C    | NHSci 2003 C     | NHSci 2003 C     | NHSci 2003 C     |          |          |
|                  | 997730                  | 997747                             | 997713            | 997751            | 997716          | 997752          | 997719           | 997724           | 997729           |          |          |
|                  | 991352                  | 991353                             | 991354            | 991355            | 991356          | 991357          | 991358           | 991359           | 991360           |          |          |
|                  | NHSci 2003 T1 D7        | NHSci 2003 T1 D14                  | NHSci 2003 T1 D21 | NHSci 2003 T1 D28 | NHSci 2003 C D0 | NHSci 2003 C D7 | NHSci 2003 C D14 | NHSci 2003 C D21 | NHSci 2003 C D28 |          |          |
|                  | 2003                    | 2003                               | 2003              | 2003              | 2003            | 2003            | 2003             | 2003             | 2003             |          |          |
|                  | T1 D7                   | T1 D14                             | T1 D21            | T1 D28            | C D0            | C D7            | C D14            | C D21            | C D28            |          |          |
|                  | 164.122                 | 167.3                              | 157.075           | 174.895           | 193.847         | 179.605         | 175.15           | 167.535          | 175.121          |          |          |
| <b>PATHWAY</b>   | T1 D7                   | T1 D14                             | T1 D21            | T1 D28            | C D0            | C D7            | C D14            | C D21            | C D28            |          |          |
| <b>SORTORDER</b> | <b>BIOCHEMICAL NAME</b> |                                    |                   |                   |                 |                 |                  |                  |                  |          |          |
|                  | 935                     | 2-stearoylglycerophosphocholine*   | 0.471137          | 1.976910          | 1.093197        | 2.881800        | 0.142354         | 0.299380         | 0.722596         | 0.957433 | 0.948414 |
|                  | 821                     | 3-dehydrocarnitine*                | 1.055172          | 1.000176          | 1.250741        | 0.997144        | 0.796472         | 0.911967         | 1.030189         | 1.124612 | 1.107199 |
|                  | 170                     | 3-indoxyl sulfate                  | 1.420325          | 1.657545          | 1.671193        | 1.254928        | 1.206457         | 1.458274         | 1.541009         | 1.428152 | 1.320807 |
|                  | 172                     | 3-methyl-2-oxobutyrate             | 0.293280          | 0.167871          | 0.244905        | 0.346274        | 1.105296         | 0.910051         | 1.327576         | 1.814206 | 1.062547 |
|                  | 173                     | 3-methyl-2-oxovalerate             | 0.451490          | 0.238624          | 0.300670        | 0.236934        | 0.759330         | 1.084110         | 1.375263         | 1.448203 | 1.193437 |
|                  | 529                     | 3-phosphoglycerate                 | 3.402536          | 2.645908          | 1.485946        | 0.728350        | 2.176234         | 1.217779         | 1.221862         | 0.810977 | 0.737985 |
|                  | 193                     | 4-methyl-2-oxopentanoate           | 0.460909          | 0.204575          | 0.327624        | 0.237775        | 0.740158         | 1.042256         | 1.272712         | 1.433275 | 1.022380 |
|                  | 266                     | 5-methylthioadenosine (MTA)        | 1.044263          | 1.367122          | 1.254916        | 1.073550        | 0.289004         | 0.884631         | 0.934973         | 1.010000 | 0.990048 |
|                  | 282                     | 5-oxoproline                       | 0.903885          | 1.130063          | 1.852311        | 1.589864        | 0.153183         | 0.524589         | 0.911681         | 1.281875 | 1.509526 |
|                  | 545                     | 6-phosphogluconate                 | 1.289458          | 1.682037          | 2.413830        | 0.698603        | 2.909097         | 1.828352         | 1.409448         | 1.182087 | 0.613797 |
|                  | 1024                    | 7-beta-hydroxycholesterol          | 0.908477          | 0.900005          | 1.996547        | 1.666871        | 0.733866         | 0.634096         | 1.241881         | 0.363094 | 0.549513 |
|                  | 712.5                   | 9,10-epoxyoctadec-12(Z)-enoic acid | 0.620291          | 1.116898          | 1.099395        | 1.044109        | 0.059289         | 0.820655         | 1.167316         | 1.585194 | 1.774989 |
|                  | 672                     | 9,10-epoxystearate                 | 0.817853          | 1.128281          | 1.628748        | 1.142459        | 0.019994         | 0.941708         | 1.716095         | 1.773805 | 1.952782 |
|                  | 822                     | acetylcarnitine                    | 1.091882          | 0.909807          | 0.964254        | 0.724809        | 0.946984         | 0.896049         | 0.929458         | 0.946289 | 0.893631 |
|                  | 601                     | acetylphosphate                    | 1.017109          | 0.933835          | 1.206181        | 0.875451        | 0.973251         | 1.033379         | 1.039707         | 0.884315 | 0.966967 |
|                  | 1105                    | adenine                            | 1.329642          | 1.071167          | 1.069334        | 0.661232        | 1.236276         | 1.089694         | 1.055918         | 1.049744 | 0.983020 |
|                  | 1106                    | adenosine                          | 1.758681          | 2.207580          | 2.464180        | 1.965764        | 1.074284         | 0.449049         | 1.793924         | 1.000000 | 0.958277 |
|                  | 1116                    | adenosine 5'-diphosphate (ADP)     | 0.990240          | 0.624122          | 1.070870        | 0.621436        | 1.058138         | 0.944544         | 1.303938         | 1.253567 | 1.055236 |
|                  | 1232                    | adenosine 5'diphosphoribose        | 1.386847          | 1.293181          | 1.343267        | 1.006366        | 0.964464         | 1.119353         | 1.176824         | 1.169441 | 1.089694 |
|                  | 1114                    | adenosine 5'-monophosphate (AMP)   | 0.831653          | 0.438269          | 1.438381        | 0.813095        | 0.644259         | 0.488595         | 1.187881         | 1.406723 | 1.413759 |
|                  | 665                     | adrenate (22:4n6)                  | 1.927933          | 0.563093          | 0.984966        | 0.739127        | 3.200191         | 0.942035         | 1.083620         | 0.699444 | 0.414703 |
|                  | 27                      | alanine                            | 0.874770          | 0.865188          | 1.228132        | 0.900917        | 0.804196         | 0.921620         | 1.192023         | 1.067891 | 1.089891 |
|                  | 1150                    | allantoin                          | 0.712057          | 0.732183          | 1.734449        | 0.522087        | 0.654238         | 0.967530         | 0.603014         | 2.550497 | 1.724930 |
|                  | 179                     | alpha-hydroxyisocaproate           | 0.591520          | 0.792749          | 1.336782        | 1.127870        | 0.292412         | 0.292412         | 0.620039         | 1.000000 | 1.270675 |
|                  | 198                     | alpha-hydroxyisovalerate           | 2.172116          | 2.928365          | 4.530204        | 3.381998        | 0.682432         | 0.723870         | 1.063730         | 1.261846 | 1.557535 |
|                  | 1266                    | alpha-tocopherol                   | 1.030627          | 1.511835          | 2.217995        | 1.259954        | 1.665669         | 1.472035         | 1.655861         | 1.189218 | 1.212788 |
|                  | 1034                    | androsterone sulfate               | 0.831395          | 0.651221          | 1.000000        | 0.931093        | 0.757549         | 0.737739         | 0.881977         | 0.651221 | 0.734964 |
|                  | 566                     | arabinose                          | 1.413825          | 1.258201          | 1.695844        | 1.021267        | 1.066718         | 0.859743         | 1.447614         | 0.940975 | 0.996570 |
|                  | 546                     | arabitol                           | 1.539209          | 1.391375          | 1.864823        | 1.393495        | 0.974765         | 0.837934         | 1.287182         | 1.001865 | 1.143131 |
|                  | 1202                    | arabonate                          | 1.147734          | 1.072461          | 1.897569        | 0.865369        | 1.037720         | 0.990561         | 1.404891         | 1.117087 | 1.216873 |
|                  | 659                     | arachidonate (20:4n6)              | 1.078842          | 0.868424          | 1.594571        | 1.230408        | 0.575088         | 0.657857         | 0.789758         | 1.351396 | 1.234454 |
|                  | 241                     | arginine                           | 1.171490          | 0.944364          | 1.266545        | 1.032011        | 0.614042         | 0.726880         | 0.769043         | 1.955988 | 1.330952 |
|                  | 25                      | asparagine                         | 0.946659          | 0.915279          | 1.176999        | 0.845391        | 1.007246         | 0.935787         | 1.024919         | 0.829923 | 0.769433 |
|                  | 24                      | aspartate                          | 1.512632          | 1.584129          | 2.131539        | 1.538915        | 1.155653         | 1.341798         | 1.469940         | 1.375295 | 1.429742 |

|                                        | DARM-00007       | DARM-00008        | DARM-00009        | DARM-00010        | DARM-00011      | DARM-00012      | DARM-00013       | DARM-00014       | DARM-00015       |
|----------------------------------------|------------------|-------------------|-------------------|-------------------|-----------------|-----------------|------------------|------------------|------------------|
|                                        | NHSCi 2003 T1    | NHSCi 2003 T1     | NHSCi 2003 T1     | NHSCi 2003 T1     | NHSCi 2003 C    | NHSCi 2003 C    | NHSCi 2003 C     | NHSCi 2003 C     | NHSCi 2003 C     |
|                                        | 997730           | 997747            | 997713            | 997751            | 997716          | 997752          | 997719           | 997724           | 997729           |
|                                        | 991352           | 991353            | 991354            | 991355            | 991356          | 991357          | 991358           | 991359           | 991360           |
|                                        | NHSCi 2003 T1 D7 | NHSCi 2003 T1 D14 | NHSCi 2003 T1 D21 | NHSCi 2003 T1 D28 | NHSCi 2003 C D0 | NHSCi 2003 C D7 | NHSCi 2003 C D14 | NHSCi 2003 C D21 | NHSCi 2003 C D28 |
|                                        | 2003 T1 D7       | 2003 T1 D14       | 2003 T1 D21       | 2003 T1 D28       | 2003 C D0       | 2003 C D7       | 2003 C D14       | 2003 C D21       | 2003 C D28       |
|                                        | 164.122          | 167.3             | 157.075           | 174.895           | 193.847         | 179.605         | 175.15           | 167.535          | 175.121          |
| <b>PATHWAY</b>                         | T1 D7            | T1 D14            | T1 D21            | T1 D28            | C D0            | C D7            | C D14            | C D21            | C D28            |
| <b>SORTORDER</b>                       |                  |                   |                   |                   |                 |                 |                  |                  |                  |
| <b>BIOCHEMICAL NAME</b>                |                  |                   |                   |                   |                 |                 |                  |                  |                  |
| 721 azelate (nonanedioate)             | 0.682096         | 1.173113          | 1.756285          | 1.817451          | 0.190083        | 0.717680        | 1.690070         | 1.879211         | 2.461886         |
| 26 beta-alanine                        | 0.584413         | 0.726402          | 1.197563          | 0.933910          | 1.128265        | 1.048528        | 1.217643         | 0.504833         | 0.910647         |
| 7 beta-hydroxypyruvate                 | 1.180178         | 1.086433          | 1.258438          | 0.896935          | 1.021749        | 0.976858        | 0.997250         | 1.121654         | 1.014890         |
| 22 betaine                             | 0.933130         | 0.930214          | 1.009451          | 0.926170          | 0.725891        | 0.814577        | 0.820209         | 0.924074         | 0.915200         |
| 1057 beta-sitosterol                   | 0.349092         | 1.164945          | 1.121738          | 0.652741          | 0.349092        | 0.716141        | 1.176649         | 0.754626         | 0.349092         |
| 1216 biliverdin                        | 0.782550         | 2.307864          | 1.006988          | 2.029219          | 0.522259        | 0.657488        | 0.522259         | 0.635626         | 0.621075         |
| 811 butyrylcarnitine                   | 1.203692         | 0.598389          | 1.228647          | 0.598389          | 0.956265        | 0.598389        | 0.598389         | 0.827407         | 1.000000         |
| 1612 caffeine                          | 0.960238         | 0.881993          | 1.128266          | 0.882947          | 0.837952        | 0.822464        | 0.970600         | 0.997440         | 0.808305         |
| 1059 campesterol                       | 0.469755         | 0.586117          | 0.906641          | 0.469755          | 0.469755        | 0.744554        | 0.469755         | 0.469755         | 1.265312         |
| 622 caprate (10:0)                     | 1.087416         | 1.119543          | 1.400746          | 1.055108          | 0.476975        | 1.014052        | 1.303035         | 1.349362         | 1.262328         |
| 618 caproate (6:0)                     | 1.633891         | 1.100260          | 1.165496          | 0.499007          | 1.991645        | 1.327569        | 1.130823         | 0.942546         | 1.104893         |
| 620 caprylate (8:0)                    | 1.270852         | 1.623069          | 1.331362          | 0.724652          | 0.995056        | 0.821415        | 1.004944         | 1.265117         | 0.902349         |
| 820 carnitine                          | 0.995475         | 0.987856          | 0.962887          | 0.897424          | 0.706026        | 0.879879        | 0.915177         | 0.936674         | 0.768970         |
| 1300 catechol sulfate                  | 1.085504         | 1.060961          | 1.227196          | 1.095614          | 0.929375        | 1.004334        | 1.121036         | 1.130126         | 1.033844         |
| 164 C-glycosyltryptophan*              | 1.011477         | 0.789510          | 0.795434          | 0.963034          | 0.843278        | 1.097891        | 0.932025         | 1.096081         | 1.323800         |
| 1020 cholesterol                       | 0.978604         | 1.048014          | 1.370470          | 1.082235          | 1.001777        | 0.998223        | 1.247736         | 0.993343         | 0.991372         |
| 881 choline                            | 0.691654         | 0.609501          | 0.750462          | 0.608133          | 0.430366        | 0.501531        | 0.601986         | 0.633683         | 0.609711         |
| 582 cis-aconitate                      | 1.056201         | 1.058446          | 1.429106          | 1.146542          | 0.581969        | 0.761887        | 1.021169         | 0.963262         | 0.734217         |
| 641 cis-vaccenate (18:1n7)             | 0.457371         | 0.457371          | 1.505220          | 1.198338          | 0.457371        | 0.457371        | 0.921005         | 1.067164         | 0.770131         |
| 579 citrate                            | 1.310357         | 1.181393          | 1.364750          | 0.740486          | 1.378132        | 1.256253        | 1.341661         | 1.039516         | 0.965796         |
| 248 citrulline                         | 1.207663         | 1.190028          | 1.318900          | 1.331753          | 1.000152        | 1.153451        | 1.195213         | 1.259432         | 1.224716         |
| 259 creatine                           | 0.966578         | 0.942507          | 1.038412          | 0.884712          | 0.829310        | 0.879152        | 0.977144         | 0.992343         | 0.947804         |
| 260 creatinine                         | 0.738254         | 1.000503          | 1.120363          | 0.989907          | 0.882203        | 0.692257        | 1.007683         | 1.008304         | 0.957200         |
| 213 cysteine                           | 0.602932         | 0.935122          | 1.994629          | 1.367534          | 0.733679        | 0.953093        | 1.009224         | 1.500656         | 1.694589         |
| 819 deoxycarnitine                     | 0.970031         | 1.021189          | 1.130594          | 0.852577          | 0.803635        | 0.737519        | 0.875669         | 1.129388         | 0.954943         |
| 655 dihomo-linoleate (20:2n6)          | 0.982251         | 0.835159          | 1.341311          | 0.905149          | 0.424406        | 0.557018        | 0.673731         | 0.806718         | 1.011501         |
| 609 dihomo-linolenate (20:3n3 or n6)   | 1.187674         | 0.992377          | 1.763481          | 1.283382          | 0.724500        | 0.557375        | 1.007623         | 1.480575         | 1.276248         |
| 531 dihydroxyacetone phosphate (DHAP)  | 61.998871        | 12.050069         | 2.816575          | 1.000000          | 1.863458        | 0.244270        | 3.489914         | 0.239333         | 0.239333         |
| 3 dimethylglycine                      | 0.986748         | 1.110931          | 0.961913          | 0.620077          | 0.801518        | 0.620077        | 0.881063         | 1.138150         | 1.097819         |
| 613 docosaehaenoate (DHA; 22:6n3)      | 1.078151         | 1.029647          | 1.572826          | 1.358235          | 0.388047        | 0.691914        | 0.685331         | 1.267066         | 1.159887         |
| 611 docosapentaenoate (n3 DPA; 22:5n3) | 0.761750         | 0.892547          | 1.224149          | 1.051463          | 0.319733        | 0.545656        | 0.612659         | 1.247338         | 1.233746         |
| 610 eicosapentaenoate (EPA; 20:5n3)    | 1.369553         | 1.123308          | 1.431160          | 1.424403          | 0.545071        | 0.846059        | 0.777166         | 1.513239         | 1.573361         |

| PATHWAY | SORTORDER | BIOCHEMICAL NAME               | DARM-00007       | DARM-00008        | DARM-00009        | DARM-00010        | DARM-00011      | DARM-00012      | DARM-00013       | DARM-00014       | DARM-00015       |
|---------|-----------|--------------------------------|------------------|-------------------|-------------------|-------------------|-----------------|-----------------|------------------|------------------|------------------|
|         |           |                                | NHSCi 2003 T1    | NHSCi 2003 T1     | NHSCi 2003 T1     | NHSCi 2003 T1     | NHSCi 2003 C    | NHSCi 2003 C    | NHSCi 2003 C     | NHSCi 2003 C     | NHSCi 2003 C     |
|         |           |                                | 997730           | 997747            | 997713            | 997751            | 997716          | 997752          | 997719           | 997724           | 997729           |
|         |           |                                | 991352           | 991353            | 991354            | 991355            | 991356          | 991357          | 991358           | 991359           | 991360           |
|         |           |                                | NHSCi 2003 T1 D7 | NHSCi 2003 T1 D14 | NHSCi 2003 T1 D21 | NHSCi 2003 T1 D28 | NHSCi 2003 C D0 | NHSCi 2003 C D7 | NHSCi 2003 C D14 | NHSCi 2003 C D21 | NHSCi 2003 C D28 |
|         |           |                                | 164.122          | 167.3             | 157.075           | 174.895           | 193.847         | 179.605         | 175.15           | 167.535          | 175.121          |
|         |           |                                | T1 D7            | T1 D14            | T1 D21            | T1 D28            | C D0            | C D7            | C D14            | C D21            | C D28            |
|         | 1565      | ergothioneine                  | 0.784646         | 0.681988          | 0.930600          | 0.684874          | 0.748471        | 0.634154        | 0.838734         | 0.860915         | 0.792828         |
|         | 735       | erucamide                      | 0.412254         | 2.102473          | 0.716545          | 2.860038          | 0.908987        | 0.928090        | 1.490537         | 0.412254         | 1.267889         |
|         | 1632      | erythritol                     | 0.984345         | 1.551734          | 3.178189          | 2.935130          | 0.631139        | 0.802128        | 1.114394         | 1.307629         | 1.635783         |
|         | 453       | erythronate*                   | 1.007852         | 1.635389          | 3.495116          | 2.871585          | 0.824411        | 0.784139        | 1.217158         | 1.052277         | 1.194033         |
|         | 876       | ethanolamine                   | 0.976310         | 1.182276          | 2.139554          | 1.681976          | 0.661163        | 0.973013        | 1.535755         | 0.807254         | 1.055717         |
|         | 472       | fructose                       | 0.719437         | 0.779202          | 1.531512          | 1.329779          | 0.894561        | 0.958225        | 1.221530         | 1.144651         | 1.227204         |
|         | 524       | fructose-6-phosphate           | 0.643762         | 1.364401          | 1.464315          | 1.058042          | 0.930426        | 0.980282        | 1.611722         | 1.461723         | 1.224940         |
|         | 594       | fumarate                       | 0.965500         | 1.061970          | 2.073842          | 0.999520          | 0.745564        | 0.651111        | 0.989373         | 1.182925         | 1.089384         |
|         | 404       | gamma-glutamylleucine          | 1.218403         | 1.381743          | 1.188831          | 1.027585          | 0.861084        | 1.136177        | 1.043399         | 1.181348         | 0.799874         |
|         | 521       | glucose                        | 1.048812         | 1.005284          | 1.222823          | 0.929519          | 0.996624        | 0.987327        | 1.111321         | 1.014258         | 1.000439         |
|         | 519       | glucose-6-phosphate (G6P)      | 0.140622         | 0.562362          | 1.400370          | 0.969094          | 0.837179        | 0.990735        | 1.573977         | 1.398377         | 1.309735         |
|         | 39        | glutamate                      | 0.994535         | 0.925599          | 1.150250          | 0.837136          | 1.005465        | 0.785885        | 1.022085         | 0.862060         | 0.841797         |
|         | 44        | glutamine                      | 1.062813         | 0.908735          | 0.717282          | 0.661240          | 1.201115        | 1.163193        | 0.999759         | 0.961272         | 0.854713         |
|         | 80        | glutaroyl carnitine            | 0.561030         | 1.301558          | 1.209044          | 0.561030          | 0.561030        | 0.922433        | 0.691707         | 1.329358         | 1.087081         |
|         | 283       | glutathione, oxidized (GSSG)   | 1.210616         | 0.898062          | 0.876079          | 0.715041          | 1.242828        | 1.251761        | 1.035441         | 0.956983         | 0.763271         |
|         | 280       | glutathione, reduced (GSH)     | 1.103042         | 1.039986          | 0.753175          | 0.694965          | 0.895697        | 1.136946        | 1.047623         | 1.055621         | 0.942391         |
|         | 517       | glycerate                      | 1.976392         | 3.643052          | 6.423595          | 5.463784          | 0.422712        | 0.776177        | 1.414852         | 1.108956         | 1.519593         |
|         | 882       | glycerol 3-phosphate (G3P)     | 5.540604         | 2.917526          | 1.946988          | 0.946531          | 1.103204        | 0.916270        | 1.210546         | 0.963145         | 0.971072         |
|         | 883       | glycerophosphorylcholine (GPC) | 0.919466         | 0.969202          | 1.144109          | 1.052735          | 1.002736        | 1.076543        | 0.981281         | 1.007094         | 1.041677         |
|         | 1         | glycine                        | 0.865601         | 0.925101          | 1.455365          | 1.246472          | 0.659939        | 0.797561        | 1.123916         | 1.310987         | 1.416995         |
|         | 851       | glycochenodeoxycholate         | 0.352703         | 0.340697          | 0.475566          | 0.337836          | 0.397406        | 0.293892        | 0.355274         | 0.415514         | 0.334810         |
|         | 840       | glycocholate                   | 0.104984         | 0.079564          | 0.079564          | 0.132460          | 0.101017        | 0.079564        | 0.161401         | 0.094308         | 0.143415         |
|         | 849       | glycodeoxycholate              | 0.199279         | 0.376987          | 0.516980          | 0.199279          | 0.229346        | 0.199279        | 0.199279         | 0.199279         | 0.241004         |
|         | 1318      | glycolate (hydroxyacetate)     | 1.143183         | 0.932388          | 1.545152          | 1.094163          | 1.017811        | 1.176863        | 1.315408         | 1.107036         | 1.005904         |
|         | 1128      | guanosine                      | 1.588398         | 1.145170          | 1.507297          | 0.848515          | 0.930315        | 1.052615        | 1.188748         | 1.185284         | 1.229062         |
|         | 1212      | heme*                          | 1.148632         | 6.165361          | 1.599098          | 5.047463          | 0.287670        | 0.917822        | 0.592773         | 0.874613         | 1.271888         |
|         | 619       | heptanoate (7:0)               | 1.422851         | 1.433715          | 1.426777          | 0.665563          | 0.963924        | 1.378515        | 1.445243         | 1.175058         | 1.431199         |
|         | 823       | hexanoylcarnitine              | 0.951152         | 1.008683          | 1.862362          | 1.699812          | 1.812086        | 0.991317        | 0.968976         | 1.276598         | 1.563901         |
|         | 1288      | hippurate                      | 1.130380         | 1.090314          | 1.336800          | 1.034929          | 0.886504        | 1.146026        | 1.072708         | 1.272584         | 0.983966         |
|         | 50        | histidine                      | 0.891287         | 0.880880          | 1.415637          | 1.104108          | 0.877838        | 0.904200        | 0.869724         | 0.995801         | 0.929091         |

| PATHWAY<br>SORTORDER | BIOCHEMICAL NAME                                                                      | DARM-00007                                                                           | DARM-00008                                                                           | DARM-00009                                                                             | DARM-00010                                                                             | DARM-00011                                                                        | DARM-00012                                                                        | DARM-00013                                                                         | DARM-00014                                                                          | DARM-00015                                                                          |
|----------------------|---------------------------------------------------------------------------------------|--------------------------------------------------------------------------------------|--------------------------------------------------------------------------------------|----------------------------------------------------------------------------------------|----------------------------------------------------------------------------------------|-----------------------------------------------------------------------------------|-----------------------------------------------------------------------------------|------------------------------------------------------------------------------------|-------------------------------------------------------------------------------------|-------------------------------------------------------------------------------------|
|                      |                                                                                       | NHSCi 2003 T1<br>997730<br>991352<br>NHSCi 2003<br>T1 D7<br>2003<br>T1 D7<br>164.122 | NHSCi 2003 T1<br>997747<br>991353<br>NHSCi 2003 T1<br>D14<br>2003<br>T1 D14<br>167.3 | NHSCi 2003 T1<br>997713<br>991354<br>NHSCi 2003 T1<br>D21<br>2003<br>T1 D21<br>157.075 | NHSCi 2003 T1<br>997751<br>991355<br>NHSCi 2003 T1<br>D28<br>2003<br>T1 D28<br>174.895 | NHSCi 2003 C<br>997716<br>991356<br>NHSCi 2003 C<br>D0<br>2003<br>C D0<br>193.847 | NHSCi 2003 C<br>997752<br>991357<br>NHSCi 2003 C<br>D7<br>2003<br>C D7<br>179.605 | NHSCi 2003 C<br>997719<br>991358<br>NHSCi 2003 C<br>D14<br>2003<br>C D14<br>175.15 | NHSCi 2003 C<br>997724<br>991359<br>NHSCi 2003 C<br>D21<br>2003<br>C D21<br>167.535 | NHSCi 2003 C<br>997729<br>991360<br>NHSCi 2003 C<br>D28<br>2003<br>C D28<br>175.121 |
|                      | 231 homocysteine                                                                      | 0.531360                                                                             | 1.113115                                                                             | 2.373456                                                                               | 1.230925                                                                               | 0.544237                                                                          | 0.958724                                                                          | 0.870555                                                                           | 1.407857                                                                            | 1.580528                                                                            |
|                      | 1585 homostachydrine*                                                                 | 0.892755                                                                             | 1.401618                                                                             | 1.181822                                                                               | 1.244467                                                                               | 1.039424                                                                          | 1.012518                                                                          | 1.063810                                                                           | 1.017809                                                                            | 1.076011                                                                            |
|                      | 206 hydroxyisovaleroyl carnitine                                                      | 0.761654                                                                             | 0.751571                                                                             | 0.863157                                                                               | 0.695321                                                                               | 0.569766                                                                          | 0.671646                                                                          | 0.784426                                                                           | 0.781351                                                                            | 0.720861                                                                            |
|                      | 1098 hypoxanthine                                                                     | 8.710523                                                                             | 8.865033                                                                             | 12.587374                                                                              | 9.000891                                                                               | 0.118663                                                                          | 0.158800                                                                          | 0.565500                                                                           | 1.116442                                                                            | 2.102075                                                                            |
|                      | 1101 inosine 5'-monophosphate (IMP)<br>Isobar: fructose 1,6-diphosphate, glucose 1,6- | 0.585711                                                                             | 1.075936                                                                             | 1.666630                                                                               | 1.269351                                                                               | 0.385234                                                                          | 0.707626                                                                          | 1.197135                                                                           | 0.697176                                                                            | 0.732847                                                                            |
|                      | 527 diphosphate, myo-inositol 1,4 or 1,3-diphosphate                                  | 8.921129                                                                             | 1.625642                                                                             | 0.865789                                                                               | 0.634155                                                                               | 0.926316                                                                          | 0.971366                                                                          | 1.139995                                                                           | 1.132752                                                                            | 1.033888                                                                            |
|                      | 561 Isobar: ribulose 5-phosphate, xylulose 5-phosphate                                | 4.962746                                                                             | 3.550338                                                                             | 1.022636                                                                               | 0.473306                                                                               | 1.869620                                                                          | 0.901465                                                                          | 1.651282                                                                           | 1.150333                                                                            | 1.043849                                                                            |
|                      | 496 Isobar: sorbitol, mannitol                                                        | 1.120801                                                                             | 1.095420                                                                             | 1.038581                                                                               | 1.001462                                                                               | 0.858118                                                                          | 0.967834                                                                          | 1.012471                                                                           | 1.017625                                                                            | 0.955391                                                                            |
|                      | 200 isobutyrylcarnitine                                                               | 1.047961                                                                             | 0.812636                                                                             | 1.089850                                                                               | 0.787524                                                                               | 1.055922                                                                          | 0.946395                                                                          | 0.852655                                                                           | 1.035817                                                                            | 0.980266                                                                            |
|                      | 180 isoleucine                                                                        | 1.291392                                                                             | 1.314360                                                                             | 1.440793                                                                               | 1.236554                                                                               | 0.738711                                                                          | 0.942842                                                                          | 1.006689                                                                           | 1.000134                                                                            | 1.042637                                                                            |
|                      | 478 isomaltose                                                                        | 1.358876                                                                             | 1.035678                                                                             | 1.427767                                                                               | 0.946433                                                                               | 0.871907                                                                          | 0.708005                                                                          | 1.574571                                                                           | 1.115136                                                                            | 1.133606                                                                            |
|                      | 205 isovalerylcarnitine                                                               | 1.011364                                                                             | 0.951183                                                                             | 1.125490                                                                               | 0.983029                                                                               | 0.896606                                                                          | 0.932978                                                                          | 1.153700                                                                           | 1.004909                                                                            | 1.079103                                                                            |
|                      | 144 kynurenine                                                                        | 1.231263                                                                             | 1.344747                                                                             | 1.025897                                                                               | 1.031093                                                                               | 0.916898                                                                          | 0.884145                                                                          | 0.938782                                                                           | 0.918975                                                                            | 0.974600                                                                            |
|                      | 536 lactate                                                                           | 0.851613                                                                             | 1.299007                                                                             | 2.068926                                                                               | 1.739866                                                                               | 0.155290                                                                          | 0.509587                                                                          | 1.032656                                                                           | 1.228308                                                                            | 1.408804                                                                            |
|                      | 1018 lathosterol                                                                      | 1.317971                                                                             | 1.082932                                                                             | 1.005054                                                                               | 1.496966                                                                               | 1.357080                                                                          | 1.039592                                                                          | 1.192467                                                                           | 0.907899                                                                            | 1.006601                                                                            |
|                      | 625 laurate (12:0)                                                                    | 1.056739                                                                             | 1.093264                                                                             | 1.121075                                                                               | 1.007549                                                                               | 0.741906                                                                          | 0.911178                                                                          | 0.708836                                                                           | 1.100290                                                                            | 1.058791                                                                            |
|                      | 181 leucine                                                                           | 1.126026                                                                             | 1.190173                                                                             | 1.415574                                                                               | 1.111550                                                                               | 0.697799                                                                          | 0.841679                                                                          | 0.969762                                                                           | 0.974177                                                                            | 0.995073                                                                            |
|                      | 604 linoleate (18:2n6)                                                                | 0.875102                                                                             | 0.833887                                                                             | 1.453063                                                                               | 0.949924                                                                               | 0.433196                                                                          | 0.499054                                                                          | 0.711618                                                                           | 1.097591                                                                            | 1.002742                                                                            |
|                      | 608 linolenate [alpha or gamma; (18:3n3 or 6)]                                        | 1.027411                                                                             | 0.990711                                                                             | 1.283112                                                                               | 1.160607                                                                               | 0.398942                                                                          | 0.762193                                                                          | 0.712826                                                                           | 0.984146                                                                            | 1.224040                                                                            |
|                      | 69 lysine                                                                             | 0.883025                                                                             | 1.166988                                                                             | 1.472896                                                                               | 1.222188                                                                               | 0.790392                                                                          | 1.019320                                                                          | 1.750394                                                                           | 0.807935                                                                            | 0.465153                                                                            |
|                      | 598 malate                                                                            | 1.003502                                                                             | 1.280109                                                                             | 2.074823                                                                               | 1.149139                                                                               | 0.538331                                                                          | 0.655303                                                                          | 1.080320                                                                           | 0.990412                                                                            | 1.110855                                                                            |
|                      | 482 maltose                                                                           | 1.151323                                                                             | 1.047599                                                                             | 1.505097                                                                               | 0.913686                                                                               | 1.244239                                                                          | 0.890840                                                                          | 1.121392                                                                           | 0.991229                                                                            | 1.079321                                                                            |
|                      | 487 mannose                                                                           | 1.000892                                                                             | 0.992949                                                                             | 1.403258                                                                               | 0.957592                                                                               | 1.154808                                                                          | 1.146123                                                                          | 1.222383                                                                           | 1.070652                                                                            | 1.033415                                                                            |
|                      | 489 mannose-6-phosphate                                                               | 0.696962                                                                             | 1.172594                                                                             | 1.886958                                                                               | 0.885715                                                                               | 0.909050                                                                          | 1.094161                                                                          | 1.671348                                                                           | 1.544267                                                                            | 1.239800                                                                            |
|                      | 635 margarate (17:0)                                                                  | 0.923266                                                                             | 1.135348                                                                             | 1.310010                                                                               | 0.788685                                                                               | 0.548332                                                                          | 0.700647                                                                          | 1.047673                                                                           | 1.081370                                                                            | 1.094870                                                                            |



| PATHWAY<br>SORTORDER | BIOCHEMICAL NAME                              | DARM-00007                                                                           | DARM-00008                                                                           | DARM-00009                                                                             | DARM-00010                                                                             | DARM-00011                                                                        | DARM-00012                                                                        | DARM-00013                                                                         | DARM-00014                                                                          | DARM-00015                                                                          |
|----------------------|-----------------------------------------------|--------------------------------------------------------------------------------------|--------------------------------------------------------------------------------------|----------------------------------------------------------------------------------------|----------------------------------------------------------------------------------------|-----------------------------------------------------------------------------------|-----------------------------------------------------------------------------------|------------------------------------------------------------------------------------|-------------------------------------------------------------------------------------|-------------------------------------------------------------------------------------|
|                      |                                               | NHSCi 2003 T1<br>997730<br>991352<br>NHSCi 2003<br>T1 D7<br>2003<br>T1 D7<br>164.122 | NHSCi 2003 T1<br>997747<br>991353<br>NHSCi 2003 T1<br>D14<br>2003<br>T1 D14<br>167.3 | NHSCi 2003 T1<br>997713<br>991354<br>NHSCi 2003 T1<br>D21<br>2003<br>T1 D21<br>157.075 | NHSCi 2003 T1<br>997751<br>991355<br>NHSCi 2003 T1<br>D28<br>2003<br>T1 D28<br>174.895 | NHSCi 2003 C<br>997716<br>991356<br>NHSCi 2003 C<br>D0<br>2003<br>C D0<br>193.847 | NHSCi 2003 C<br>997752<br>991357<br>NHSCi 2003 C<br>D7<br>2003<br>C D7<br>179.605 | NHSCi 2003 C<br>997719<br>991358<br>NHSCi 2003 C<br>D14<br>2003<br>C D14<br>175.15 | NHSCi 2003 C<br>997724<br>991359<br>NHSCi 2003 C<br>D21<br>2003<br>C D21<br>167.535 | NHSCi 2003 C<br>997729<br>991360<br>NHSCi 2003 C<br>D28<br>2003<br>C D28<br>175.121 |
|                      |                                               | T1 D7                                                                                | T1 D14                                                                               | T1 D21                                                                                 | T1 D28                                                                                 | C D0                                                                              | C D7                                                                              | C D14                                                                              | C D21                                                                               | C D28                                                                               |
|                      | 658 mead acid (20:3n9)                        | 1.333776                                                                             | 1.087334                                                                             | 1.439768                                                                               | 0.932462                                                                               | 1.099678                                                                          | 0.338017                                                                          | 1.068211                                                                           | 1.017473                                                                            | 1.586494                                                                            |
|                      | 225 methionine                                | 1.236252                                                                             | 0.929883                                                                             | 0.811302                                                                               | 0.651478                                                                               | 1.160123                                                                          | 1.180169                                                                          | 0.871566                                                                           | 0.901873                                                                            | 0.687137                                                                            |
|                      | 890 myo-inositol                              | 0.968812                                                                             | 1.005715                                                                             | 1.227931                                                                               | 0.956508                                                                               | 1.021586                                                                          | 1.003842                                                                          | 1.182792                                                                           | 0.867133                                                                            | 0.963764                                                                            |
|                      | 629 myristate (14:0)                          | 0.914252                                                                             | 1.098585                                                                             | 1.397366                                                                               | 0.918903                                                                               | 0.504823                                                                          | 0.982336                                                                          | 1.142496                                                                           | 1.422700                                                                            | 1.173415                                                                            |
|                      | 630 myristoleate (14:1n5)                     | 0.493142                                                                             | 0.801909                                                                             | 1.081880                                                                               | 0.943002                                                                               | 0.493142                                                                          | 0.493142                                                                          | 0.493142                                                                           | 1.792657                                                                            | 0.970121                                                                            |
|                      | 1242.1 N1-Methyl-2-pyridone-5-carboxamide     | 1.383300                                                                             | 1.750319                                                                             | 1.120382                                                                               | 1.061218                                                                               | 1.342540                                                                          | 1.482435                                                                          | 0.997898                                                                           | 1.324739                                                                            | 1.150634                                                                            |
|                      | 75 N-6-trimethyllysine                        | 0.836252                                                                             | 0.728505                                                                             | 0.655402                                                                               | 0.783742                                                                               | 0.633017                                                                          | 0.957624                                                                          | 0.823612                                                                           | 0.761338                                                                            | 0.862918                                                                            |
|                      | 4 N-acetylglycine                             | 1.610581                                                                             | 1.004149                                                                             | 1.678312                                                                               | 0.949968                                                                               | 1.557341                                                                          | 1.587705                                                                          | 1.364960                                                                           | 0.896347                                                                            | 0.584292                                                                            |
|                      | 227 N-acetylmethionine                        | 0.800527                                                                             | 0.800527                                                                             | 1.080367                                                                               | 0.810114                                                                               | 0.934350                                                                          | 0.800527                                                                          | 0.892268                                                                           | 1.145774                                                                            | 1.130997                                                                            |
|                      | 455 N-acetylneuraminic acid                   | 1.046157                                                                             | 0.896041                                                                             | 1.939640                                                                               | 1.942435                                                                               | 0.324105                                                                          | 0.700931                                                                          | 1.405333                                                                           | 1.089991                                                                            | 1.780015                                                                            |
|                      | 1221 nicotinamide                             | 1.286544                                                                             | 0.957622                                                                             | 1.061303                                                                               | 1.181597                                                                               | 0.875045                                                                          | 0.869904                                                                          | 1.194063                                                                           | 1.526762                                                                            | 1.075616                                                                            |
|                      | 1224 nicotinamide adenine dinucleotide (NAD+) | 1.731941                                                                             | 0.997915                                                                             | 0.985197                                                                               | 0.742747                                                                               | 0.722391                                                                          | 1.078624                                                                          | 0.856726                                                                           | 1.029014                                                                            | 0.637361                                                                            |
|                      | 825 octanoylcarnitine                         | 0.783359                                                                             | 0.894006                                                                             | 1.209520                                                                               | 1.028082                                                                               | 0.599376                                                                          | 0.842428                                                                          | 0.880027                                                                           | 1.146807                                                                            | 1.000816                                                                            |
|                      | 639 oleate (18:1n9)                           | 0.973637                                                                             | 1.482457                                                                             | 1.323943                                                                               | 0.994752                                                                               | 1.219680                                                                          | 0.938441                                                                          | 1.162406                                                                           | 0.979411                                                                            | 0.847502                                                                            |
|                      | 835 oleoylcarnitine                           | 0.268949                                                                             | 2.834940                                                                             | 1.297484                                                                               | 4.715415                                                                               | 0.093963                                                                          | 0.269900                                                                          | 0.344264                                                                           | 0.505751                                                                            | 0.840201                                                                            |
|                      | 285 ophthalmate                               | 1.000000                                                                             | 0.357655                                                                             | 0.252181                                                                               | 0.252181                                                                               | 1.508191                                                                          | 0.421720                                                                          | 0.252181                                                                           | 0.252181                                                                            | 0.252181                                                                            |
|                      | 244 ornithine                                 | 0.979060                                                                             | 1.057577                                                                             | 1.502068                                                                               | 1.109598                                                                               | 1.019818                                                                          | 1.069739                                                                          | 1.261234                                                                           | 0.891207                                                                            | 0.993771                                                                            |
|                      | 632 palmitate (16:0)                          | 0.888735                                                                             | 1.072139                                                                             | 1.569051                                                                               | 0.951411                                                                               | 0.651755                                                                          | 0.773816                                                                          | 1.043567                                                                           | 1.081979                                                                            | 1.063466                                                                            |
|                      | 633 palmitoleate (16:1n7)                     | 1.026919                                                                             | 1.052117                                                                             | 2.047386                                                                               | 0.979584                                                                               | 0.439121                                                                          | 0.832635                                                                          | 0.728747                                                                           | 1.156837                                                                            | 1.320546                                                                            |
|                      | 1004 palmitoyl sphingomyelin                  | 1.005813                                                                             | 1.022249                                                                             | 1.443170                                                                               | 0.999408                                                                               | 1.002119                                                                          | 0.922277                                                                          | 1.278155                                                                           | 0.994232                                                                            | 1.032554                                                                            |
|                      | 833 palmitoylcarnitine                        | 0.373139                                                                             | 2.170117                                                                             | 1.108468                                                                               | 4.325253                                                                               | 0.059115                                                                          | 0.263145                                                                          | 0.394131                                                                           | 0.597176                                                                            | 0.935597                                                                            |
|                      | 1243 pantothenate                             | 1.002883                                                                             | 1.042906                                                                             | 1.313703                                                                               | 1.255659                                                                               | 0.981934                                                                          | 0.822225                                                                          | 1.198455                                                                           | 1.123216                                                                            | 1.117671                                                                            |
|                      | 1613 paraxanthine                             | 1.092740                                                                             | 1.281806                                                                             | 1.135697                                                                               | 1.108726                                                                               | 0.775678                                                                          | 1.172639                                                                          | 1.077312                                                                           | 1.018185                                                                            | 1.005584                                                                            |
|                      | 88 p-cresol sulfate                           | 1.329539                                                                             | 1.356562                                                                             | 1.700649                                                                               | 1.269245                                                                               | 1.238055                                                                          | 1.227651                                                                          | 1.449294                                                                           | 1.401530                                                                            | 1.285396                                                                            |
|                      | 621 pelargonate (9:0)                         | 1.511461                                                                             | 1.540620                                                                             | 1.473003                                                                               | 0.888205                                                                               | 0.696694                                                                          | 1.152892                                                                          | 1.285336                                                                           | 1.031785                                                                            | 1.115217                                                                            |
|                      | 631 pentadecanoate (15:0)                     | 0.955568                                                                             | 1.016540                                                                             | 1.401995                                                                               | 0.890441                                                                               | 0.614889                                                                          | 0.987654                                                                          | 0.988003                                                                           | 1.234391                                                                            | 0.996066                                                                            |
|                      | 135 phenol sulfate                            | 1.054251                                                                             | 1.118233                                                                             | 1.165138                                                                               | 1.010064                                                                               | 0.952208                                                                          | 0.941851                                                                          | 1.171854                                                                           | 1.335752                                                                            | 0.989869                                                                            |
|                      | 128 phenylacetylglutamine                     | 1.578694                                                                             | 1.452507                                                                             | 1.623517                                                                               | 1.225483                                                                               | 1.160408                                                                          | 1.250494                                                                          | 1.445612                                                                           | 1.491337                                                                            | 1.335129                                                                            |
|                      | 83 phenylalanine                              | 1.162565                                                                             | 1.148260                                                                             | 1.187508                                                                               | 1.160993                                                                               | 0.751191                                                                          | 0.987472                                                                          | 1.048000                                                                           | 1.127775                                                                            | 1.134973                                                                            |
|                      | 602 phosphate                                 | 0.727684                                                                             | 0.751826                                                                             | 1.234300                                                                               | 1.003948                                                                               | 0.933507                                                                          | 0.996052                                                                          | 1.373690                                                                           | 1.201725                                                                            | 1.200027                                                                            |
|                      | 534 phosphoenolpyruvate (PEP)                 | 3.894760                                                                             | 2.959487                                                                             | 2.072928                                                                               | 0.821136                                                                               | 3.050557                                                                          | 2.009289                                                                          | 0.720522                                                                           | 0.580553                                                                            | 0.392959                                                                            |
|                      | 877 phosphoethanolamine                       | 0.593700                                                                             | 0.593700                                                                             | 0.996335                                                                               | 0.593700                                                                               | 0.593700                                                                          | 0.831274                                                                          | 1.633338                                                                           | 0.593700                                                                            | 0.819262                                                                            |

| PATHWAY<br>SORTORDER | BIOCHEMICAL NAME                 | DARM-00007                                                                           | DARM-00008                                                                           | DARM-00009                                                                             | DARM-00010                                                                             | DARM-00011                                                                        | DARM-00012                                                                        | DARM-00013                                                                         | DARM-00014                                                                          | DARM-00015                                                                          |
|----------------------|----------------------------------|--------------------------------------------------------------------------------------|--------------------------------------------------------------------------------------|----------------------------------------------------------------------------------------|----------------------------------------------------------------------------------------|-----------------------------------------------------------------------------------|-----------------------------------------------------------------------------------|------------------------------------------------------------------------------------|-------------------------------------------------------------------------------------|-------------------------------------------------------------------------------------|
|                      |                                  | NHSCi 2003 T1<br>997730<br>991352<br>NHSCi 2003<br>T1 D7<br>2003<br>T1 D7<br>164.122 | NHSCi 2003 T1<br>997747<br>991353<br>NHSCi 2003 T1<br>D14<br>2003<br>T1 D14<br>167.3 | NHSCi 2003 T1<br>997713<br>991354<br>NHSCi 2003 T1<br>D21<br>2003<br>T1 D21<br>157.075 | NHSCi 2003 T1<br>997751<br>991355<br>NHSCi 2003 T1<br>D28<br>2003<br>T1 D28<br>174.895 | NHSCi 2003 C<br>997716<br>991356<br>NHSCi 2003 C<br>D0<br>2003<br>C D0<br>193.847 | NHSCi 2003 C<br>997752<br>991357<br>NHSCi 2003 C<br>D7<br>2003<br>C D7<br>179.605 | NHSCi 2003 C<br>997719<br>991358<br>NHSCi 2003 C<br>D14<br>2003<br>C D14<br>175.15 | NHSCi 2003 C<br>997724<br>991359<br>NHSCi 2003 C<br>D21<br>2003<br>C D21<br>167.535 | NHSCi 2003 C<br>997729<br>991360<br>NHSCi 2003 C<br>D28<br>2003<br>C D28<br>175.121 |
|                      |                                  | T1 D7                                                                                | T1 D14                                                                               | T1 D21                                                                                 | T1 D28                                                                                 | C D0                                                                              | C D7                                                                              | C D14                                                                              | C D21                                                                               | C D28                                                                               |
|                      | 74 pipercolate                   | 1.069883                                                                             | 1.134205                                                                             | 0.977444                                                                               | 1.002204                                                                               | 1.013801                                                                          | 1.188600                                                                          | 1.075593                                                                           | 1.137417                                                                            | 1.042642                                                                            |
|                      | 1531 piperine                    | 0.960533                                                                             | 0.742917                                                                             | 1.179921                                                                               | 0.853887                                                                               | 1.249044                                                                          | 0.728075                                                                          | 0.763679                                                                           | 0.914611                                                                            | 0.966844                                                                            |
|                      | 246 proline                      | 0.933815                                                                             | 0.900005                                                                             | 1.248685                                                                               | 0.994499                                                                               | 0.834910                                                                          | 0.829551                                                                          | 1.035551                                                                           | 1.018197                                                                            | 1.014322                                                                            |
|                      | 809 propionylcarnitine           | 0.821648                                                                             | 0.622675                                                                             | 0.778856                                                                               | 0.487806                                                                               | 0.797352                                                                          | 0.723017                                                                          | 0.822425                                                                           | 0.808531                                                                            | 0.730360                                                                            |
|                      | 1181 pseudouridine               | 0.788985                                                                             | 1.126088                                                                             | 1.638792                                                                               | 1.000323                                                                               | 0.998180                                                                          | 0.868874                                                                          | 1.197681                                                                           | 1.779715                                                                            | 1.219948                                                                            |
|                      | 45 pyroglutamine*                | 0.597374                                                                             | 0.350441                                                                             | 0.661227                                                                               | 0.699686                                                                               | 0.650159                                                                          | 0.422165                                                                          | 0.651579                                                                           | 0.517207                                                                            | 0.542282                                                                            |
|                      | 603 pyrophosphate (PPi)          | 0.717524                                                                             | 0.878915                                                                             | 1.009637                                                                               | 0.394905                                                                               | 1.914621                                                                          | 1.822755                                                                          | 0.565763                                                                           | 0.186096                                                                            | 0.385259                                                                            |
|                      | 535 pyruvate                     | 0.102391                                                                             | 0.131934                                                                             | 2.234781                                                                               | 3.365902                                                                               | 1.475749                                                                          | 1.639510                                                                          | 2.224493                                                                           | 0.984990                                                                            | 0.820186                                                                            |
|                      | 1469 ranitidine                  | 1.026638                                                                             | 1.000000                                                                             | 1.315141                                                                               | 0.918342                                                                               | 0.929226                                                                          | 0.811072                                                                          | 1.130570                                                                           | 1.097961                                                                            | 1.032377                                                                            |
|                      | 548 ribitol                      | 4.495617                                                                             | 5.122583                                                                             | 7.448713                                                                               | 5.634157                                                                               | 0.953701                                                                          | 0.705272                                                                          | 1.225451                                                                           | 0.958717                                                                            | 1.127218                                                                            |
|                      | 557 ribose 5-phosphate           | 2.712544                                                                             | 2.466099                                                                             | 1.739737                                                                               | 0.865699                                                                               | 1.578994                                                                          | 1.289816                                                                          | 1.277638                                                                           | 0.854524                                                                            | 1.058120                                                                            |
|                      | 559 ribulose                     | 3.518619                                                                             | 1.756845                                                                             | 1.714623                                                                               | 0.951284                                                                               | 0.240496                                                                          | 0.967002                                                                          | 0.586343                                                                           | 0.838888                                                                            | 0.736292                                                                            |
|                      | 224 S-adenosylhomocysteine (SAH) | 0.981614                                                                             | 0.874326                                                                             | 1.103269                                                                               | 0.971546                                                                               | 0.549981                                                                          | 0.935056                                                                          | 1.133643                                                                           | 1.321041                                                                            | 1.220628                                                                            |
|                      | 551 sedoheptulose-7-phosphate    | 0.074096                                                                             | 0.074096                                                                             | 0.370648                                                                               | 1.117716                                                                               | 0.288959                                                                          | 2.351756                                                                          | 0.606188                                                                           | 1.196406                                                                            | 1.451772                                                                            |
|                      | 8 serine                         | 0.961262                                                                             | 1.021881                                                                             | 1.433833                                                                               | 1.111375                                                                               | 0.827123                                                                          | 0.873389                                                                          | 1.064693                                                                           | 0.967975                                                                            | 1.012033                                                                            |
|                      | 216 S-methylcysteine             | 1.347967                                                                             | 2.027787                                                                             | 2.625465                                                                               | 1.746811                                                                               | 1.542209                                                                          | 2.067163                                                                          | 2.179524                                                                           | 1.810258                                                                            | 1.631400                                                                            |
|                      | 281 S-methylglutathione          | 1.435206                                                                             | 1.234675                                                                             | 1.095895                                                                               | 0.686720                                                                               | 0.964557                                                                          | 1.032169                                                                          | 1.035304                                                                           | 1.032800                                                                            | 0.975118                                                                            |
|                      | 270 spermidine                   | 0.728213                                                                             | 0.792122                                                                             | 0.977184                                                                               | 0.791319                                                                               | 0.603725                                                                          | 0.745592                                                                          | 0.874977                                                                           | 1.000993                                                                            | 0.999007                                                                            |
|                      | 1584 stachydrine                 | 0.126761                                                                             | 0.113742                                                                             | 0.140217                                                                               | 0.083990                                                                               | 0.110678                                                                          | 0.107599                                                                          | 0.113977                                                                           | 0.160798                                                                            | 0.113338                                                                            |
|                      | 637 stearate (18:0)              | 1.001200                                                                             | 1.113420                                                                             | 1.518442                                                                               | 0.897809                                                                               | 0.614115                                                                          | 0.762619                                                                          | 1.106370                                                                           | 1.094080                                                                            | 1.019197                                                                            |
|                      | 1005 stearoyl sphingomyelin      | 1.107782                                                                             | 1.183502                                                                             | 1.470237                                                                               | 1.026462                                                                               | 1.096071                                                                          | 1.059961                                                                          | 1.281980                                                                           | 1.109648                                                                            | 1.155776                                                                            |
|                      | 834 stearyl carnitine            | 0.236361                                                                             | 2.549162                                                                             | 1.139666                                                                               | 4.371011                                                                               | 0.101169                                                                          | 0.193408                                                                          | 0.319916                                                                           | 0.412648                                                                            | 0.892457                                                                            |
|                      | 591 succinylcarnitine            | 0.739038                                                                             | 0.699879                                                                             | 0.962272                                                                               | 0.780915                                                                               | 0.640083                                                                          | 0.605184                                                                          | 0.760776                                                                           | 0.870464                                                                            | 0.832856                                                                            |
|                      | 1662 terephthalic acid           | 0.733730                                                                             | 0.795418                                                                             | 0.987941                                                                               | 0.609384                                                                               | 0.814955                                                                          | 0.782714                                                                          | 0.729966                                                                           | 0.751060                                                                            | 0.689335                                                                            |
|                      | 1614 theobromine                 | 1.092207                                                                             | 0.995990                                                                             | 1.355886                                                                               | 0.974437                                                                               | 1.222130                                                                          | 0.997137                                                                          | 1.226037                                                                           | 1.301636                                                                            | 1.482369                                                                            |
|                      | 1615 theophylline                | 1.055476                                                                             | 2.037853                                                                             | 0.963742                                                                               | 0.882810                                                                               | 0.593850                                                                          | 0.883607                                                                          | 1.658663                                                                           | 1.290417                                                                            | 1.158929                                                                            |
|                      | 549 threitol                     | 1.227774                                                                             | 1.396417                                                                             | 2.318889                                                                               | 1.486356                                                                               | 0.916646                                                                          | 1.098222                                                                          | 1.454849                                                                           | 1.242685                                                                            | 1.368344                                                                            |
|                      | 1199 threonate                   | 1.153959                                                                             | 1.073193                                                                             | 1.627627                                                                               | 1.204023                                                                               | 1.030629                                                                          | 0.881667                                                                          | 1.165691                                                                           | 0.998396                                                                            | 0.996490                                                                            |
|                      | 17 threonine                     | 0.918846                                                                             | 1.151981                                                                             | 1.078225                                                                               | 0.891232                                                                               | 0.831370                                                                          | 0.772558                                                                          | 0.850172                                                                           | 1.006377                                                                            | 0.958014                                                                            |
|                      | 252 trans-4-hydroxyproline       | 1.301346                                                                             | 1.467660                                                                             | 1.254497                                                                               | 1.338684                                                                               | 1.079311                                                                          | 1.322353                                                                          | 1.232542                                                                           | 1.259168                                                                            | 1.324749                                                                            |

| DARM-00007       | DARM-00008        | DARM-00009        | DARM-00010        | DARM-00011      | DARM-00012      | DARM-00013       | DARM-00014       | DARM-00015       |
|------------------|-------------------|-------------------|-------------------|-----------------|-----------------|------------------|------------------|------------------|
| NHSCi 2003 T1    | NHSCi 2003 T1     | NHSCi 2003 T1     | NHSCi 2003 T1     | NHSCi 2003 C    | NHSCi 2003 C    | NHSCi 2003 C     | NHSCi 2003 C     | NHSCi 2003 C     |
| 997730           | 997747            | 997713            | 997751            | 997716          | 997752          | 997719           | 997724           | 997729           |
| 991352           | 991353            | 991354            | 991355            | 991356          | 991357          | 991358           | 991359           | 991360           |
| NHSCi 2003 T1 D7 | NHSCi 2003 T1 D14 | NHSCi 2003 T1 D21 | NHSCi 2003 T1 D28 | NHSCi 2003 C D0 | NHSCi 2003 C D7 | NHSCi 2003 C D14 | NHSCi 2003 C D21 | NHSCi 2003 C D28 |
| 2003             | 2003              | 2003              | 2003              | 2003            | 2003            | 2003             | 2003             | 2003             |
| 164.122          | 167.3             | 157.075           | 174.895           | 193.847         | 179.605         | 175.15           | 167.535          | 175.121          |
| T1 D7            | T1 D14            | T1 D21            | T1 D28            | C D0            | C D7            | C D14            | C D21            | C D28            |

**PATHWAY**

**SORTORDER BIOCHEMICAL NAME**

|                                         |          |          |          |          |          |          |          |          |          |
|-----------------------------------------|----------|----------|----------|----------|----------|----------|----------|----------|----------|
| 501 trehalose                           | 0.362640 | 0.987376 | 1.609654 | 1.426670 | 0.113570 | 0.650401 | 1.428155 | 1.125481 | 1.280808 |
| 1242 trigonelline (N'-methylnicotinate) | 0.715801 | 0.684877 | 0.871114 | 0.585378 | 0.623422 | 0.601493 | 0.693382 | 0.760873 | 0.678253 |
| 145 tryptophan                          | 1.078077 | 1.083771 | 1.113171 | 1.070096 | 0.751759 | 0.916593 | 1.010252 | 1.026334 | 1.038789 |
| 151 tryptophan betaine                  | 0.563749 | 0.508787 | 0.669942 | 0.503194 | 0.458304 | 0.486344 | 0.559234 | 0.590852 | 0.539042 |
| 99 tyrosine                             | 1.001827 | 0.996271 | 0.970865 | 1.064605 | 0.657797 | 0.878995 | 0.919015 | 0.983225 | 0.905808 |
| 1149 urate                              | 1.150613 | 0.785304 | 1.132320 | 0.774115 | 0.972108 | 0.898797 | 1.127136 | 1.048037 | 0.910508 |
| 245 urea                                | 1.137894 | 1.121389 | 1.516343 | 1.104584 | 1.008742 | 1.027302 | 1.164212 | 1.078467 | 1.153603 |
| 1180 uridine                            | 1.008468 | 1.022501 | 1.072821 | 1.092326 | 0.489820 | 0.676550 | 0.646663 | 0.778744 | 0.613988 |
| 190 valine                              | 1.015633 | 1.036547 | 1.072693 | 1.005024 | 0.742738 | 0.884658 | 0.936333 | 0.999074 | 0.988365 |
| 565 xylitol                             | 1.000000 | 1.100450 | 0.551869 | 0.230551 | 0.127693 | 0.127693 | 0.127693 | 0.127693 | 0.127693 |
| 570 xylonate                            | 0.895473 | 1.304235 | 2.210136 | 1.450331 | 0.462607 | 0.657234 | 1.393716 | 1.403347 | 1.195373 |
| 569 xylose                              | 0.912174 | 2.319280 | 5.113885 | 3.642480 | 0.628684 | 0.539617 | 0.992577 | 0.902007 | 0.765536 |

| PATHWAY | SORTORDER | BIOCHEMICAL NAME                                       | DARM-00016       | DARM-00017       | DARM-00018        | DARM-00019        | DARM-00020        | DARM-00021       | DARM-00022       | DARM-00023        | DARM-00024        |
|---------|-----------|--------------------------------------------------------|------------------|------------------|-------------------|-------------------|-------------------|------------------|------------------|-------------------|-------------------|
|         |           |                                                        | NHSCI 1866 T2    | NHSCI 1866 T2    | NHSCI 1866 T2     | NHSCI 1866 T2     | NHSCI 1866 T2     | NHSCI 1866 T1    | NHSCI 1866 T1    | NHSCI 1866 T1     | NHSCI 1866 T1     |
|         |           |                                                        | 997715           | 997736           | 997748            | 997740            | 997720            | 997746           | 997738           | 997739            | 997737            |
|         |           |                                                        | 991361           | 991362           | 991363            | 991364            | 991365            | 991366           | 991367           | 991368            | 991369            |
|         |           |                                                        | NHSCI 1866 T2 D0 | NHSCI 1866 T2 D7 | NHSCI 1866 T2 D14 | NHSCI 1866 T2 D21 | NHSCI 1866 T2 D28 | NHSCI 1866 T1 D0 | NHSCI 1866 T1 D7 | NHSCI 1866 T1 D14 | NHSCI 1866 T1 D21 |
|         |           |                                                        | 1866             | 1866             | 1866              | 1866              | 1866              | 1866             | 1866             | 1866              | 1866              |
|         |           |                                                        | T2 D0            | T2 D7            | T2 D14            | T2 D21            | T2 D28            | T1 D0            | T1 D7            | T1 D14            | T1 D21            |
|         |           |                                                        | 176.276          | 164.34           | 172.339           | 203.125           | 169.237           | 179.08           | 165.545          | 173.574           | 171.422           |
|         |           |                                                        | T2 D0            | T2 D7            | T2 D14            | T2 D21            | T2 D28            | T1 D0            | T1 D7            | T1 D14            | T1 D21            |
|         |           | 905 1,2-propanediol                                    | 0.501077         | 1.008225         | 1.193957          | 1.193501          | 1.938786          | 0.508979         | 1.258147         | 0.991775          | 1.268883          |
|         |           | 532 1,3-dihydroxyacetone                               | 0.899202         | 1.177730         | 1.244416          | 0.772604          | 1.132467          | 1.168994         | 0.769801         | 1.005678          | 0.959741          |
|         |           | 515 1,5-anhydroglucitol (1,5-AG)                       | 0.844037         | 1.254906         | 1.004858          | 0.901235          | 0.948845          | 0.907074         | 0.946739         | 0.816629          | 1.175666          |
|         |           | 523 1,6-anhydroglucose                                 | 1.025619         | 0.956088         | 0.889175          | 0.841386          | 0.962219          | 0.994738         | 1.588749         | 1.606576          | 0.933949          |
|         |           | 636 10-heptadecenoate (17:1n7)                         | 0.637262         | 0.970133         | 0.985518          | 1.052469          | 1.538224          | 0.700381         | 1.071490         | 1.082156          | 1.334958          |
|         |           | 742 13-methylmyristic acid                             | 0.455073         | 0.815653         | 0.948027          | 0.819492          | 1.621920          | 0.647528         | 0.845897         | 1.066714          | 1.169079          |
|         |           | 744 15-methylpalmitate (isobar with 2-                 | 0.597510         | 0.982369         | 1.163702          | 1.024727          | 1.957059          | 0.494582         | 0.861680         | 0.925836          | 1.158560          |
|         |           | 919 1-arachidonoylglycerophosphoethanolamine*          | 2.419082         | 1.048455         | 0.967015          | 1.023348          | 0.989288          | 0.857216         | 0.782681         | 0.764023          | 0.773242          |
|         |           | 938 1-linoleoylglycerophosphocholine                   | 1.855847         | 1.000051         | 0.925648          | 0.931377          | 1.376081          | 0.907058         | 1.006436         | 0.978712          | 0.997585          |
|         |           | 926 1-myristoylglycerophosphocholine                   | 0.416175         | 0.988348         | 1.054465          | 0.783463          | 1.151580          | 0.416175         | 1.294287         | 1.441688          | 2.835265          |
|         |           | 936 1-oleoylglycerophosphocholine                      | 0.381280         | 1.226697         | 0.980908          | 0.692886          | 2.067848          | 0.266163         | 3.892917         | 3.278638          | 7.683218          |
|         |           | 915 1-oleoylglycerophosphoethanolamine                 | 2.621518         | 1.928930         | 0.606206          | 0.805842          | 1.208158          | 0.848328         | 0.546344         | 0.935000          | 0.575729          |
|         |           | 970 1-palmitoylglycerol (1-monopalmitin)               | 1.023991         | 0.450335         | 0.871233          | 1.022293          | 1.758619          | 0.539628         | 1.299680         | 1.191308          | 1.132647          |
|         |           | 929 1-palmitoylglycerophosphocholine                   | 0.361715         | 1.085191         | 0.914809          | 0.696891          | 1.936666          | 0.261963         | 2.979872         | 2.547329          | 4.767351          |
|         |           | 909 1-palmitoylglycerophosphoethanolamine              | 2.224498         | 0.890349         | 0.728149          | 0.739888          | 1.302269          | 0.696349         | 0.859563         | 0.611085          | 0.921061          |
|         |           | 934 1-stearoylglycerophosphocholine                    | 0.294113         | 0.988165         | 1.048981          | 1.015904          | 1.690865          | 0.204017         | 2.633812         | 2.394982          | 5.054173          |
|         |           | 533 2,3-diphosphoglycerate                             | 3.131756         | 0.966633         | 0.162678          | 0.029859          | 0.029859          | 3.760561         | 4.571819         | 3.055307          | 1.204192          |
|         |           | 263 2-aminobutyrate                                    | 1.037938         | 1.366085         | 1.276321          | 1.163623          | 1.284605          | 1.086646         | 1.141614         | 1.205569          | 1.178580          |
|         |           | 945 2-arachidonoylglycerophosphocholine*               | 0.204822         | 1.041897         | 1.193644          | 0.911195          | 1.284297          | 0.475697         | 2.489087         | 2.367750          | 4.398900          |
|         |           | 920 2-arachidonoylglycerophosphoethanolamine*          | 0.248766         | 1.297378         | 1.546375          | 1.140669          | 1.590801          | 0.305701         | 2.801008         | 2.664413          | 4.042665          |
|         |           | 923 2-docosahexaenoylglycerophosphoethanolamine*       | 0.366251         | 0.948162         | 1.428324          | 0.924428          | 1.196317          | 0.388730         | 2.868841         | 2.755786          | 4.333425          |
|         |           | 922 2-docosapentaenoylglycerophosphoethanolamine*      | 0.236388         | 0.951478         | 1.058894          | 1.157643          | 1.488061          | 0.391367         | 2.983034         | 2.469585          | 4.308172          |
|         |           | 1360 2-ethylhexanoate (isobar with 2-propylpentanoate) | 1.241506         | 1.141880         | 0.916301          | 0.710488          | 0.796478          | 0.596475         | 1.130952         | 0.557898          | 0.649441          |
|         |           | 229 2-hydroxybutyrate (AHB)                            | 0.963573         | 1.203928         | 1.215463          | 1.044740          | 1.116515          | 1.139958         | 1.171647         | 1.132603          | 1.105859          |
|         |           | 714 2-hydroxyglutarate                                 | 0.865141         | 1.095801         | 1.443789          | 1.285344          | 2.250042          | 0.686172         | 2.522823         | 2.434008          | 2.650167          |
|         |           | 706 2-hydroxypalmitate                                 | 1.536941         | 0.870774         | 0.930895          | 0.739916          | 1.158822          | 0.703316         | 1.003106         | 0.996894          | 1.211751          |
|         |           | 939 2-linoleoylglycerophosphocholine*                  | 0.229996         | 0.994754         | 0.832122          | 0.822841          | 0.734574          | 0.229996         | 1.696925         | 1.813504          | 3.067099          |
|         |           | 202 2-methylbutyrylcarnitine                           | 1.369594         | 1.050483         | 1.001283          | 0.888389          | 1.170955          | 1.005300         | 0.998717         | 0.710477          | 0.831663          |
|         |           | 937 2-oleoylglycerophosphocholine*                     | 0.511220         | 1.142690         | 1.000000          | 0.592969          | 1.064918          | 0.446642         | 2.370144         | 1.870782          | 3.969860          |
|         |           | 930 2-palmitoylglycerophosphocholine*                  | 0.353213         | 1.039430         | 1.174607          | 1.057279          | 1.514626          | 0.129147         | 2.300603         | 2.070896          | 4.057640          |

|                  | DARM-00016              | DARM-00017                         | DARM-00018        | DARM-00019        | DARM-00020        | DARM-00021       | DARM-00022       | DARM-00023        | DARM-00024        |          |          |
|------------------|-------------------------|------------------------------------|-------------------|-------------------|-------------------|------------------|------------------|-------------------|-------------------|----------|----------|
|                  | NHSCI 1866 T2           | NHSCI 1866 T2                      | NHSCI 1866 T2     | NHSCI 1866 T2     | NHSCI 1866 T2     | NHSCI 1866 T1    | NHSCI 1866 T1    | NHSCI 1866 T1     | NHSCI 1866 T1     |          |          |
|                  | 997715                  | 997736                             | 997748            | 997740            | 997720            | 997746           | 997738           | 997739            | 997737            |          |          |
|                  | 991361                  | 991362                             | 991363            | 991364            | 991365            | 991366           | 991367           | 991368            | 991369            |          |          |
|                  | NHSCI 1866 T2 D0        | NHSCI 1866 T2 D7                   | NHSCI 1866 T2 D14 | NHSCI 1866 T2 D21 | NHSCI 1866 T2 D28 | NHSCI 1866 T1 D0 | NHSCI 1866 T1 D7 | NHSCI 1866 T1 D14 | NHSCI 1866 T1 D21 |          |          |
|                  | 1866                    | 1866                               | 1866              | 1866              | 1866              | 1866             | 1866             | 1866              | 1866              |          |          |
|                  | T2 D0                   | T2 D7                              | T2 D14            | T2 D21            | T2 D28            | T1 D0            | T1 D7            | T1 D14            | T1 D21            |          |          |
|                  | 176.276                 | 164.34                             | 172.339           | 203.125           | 169.237           | 179.08           | 165.545          | 173.574           | 171.422           |          |          |
| <b>PATHWAY</b>   | T2 D0                   | T2 D7                              | T2 D14            | T2 D21            | T2 D28            | T1 D0            | T1 D7            | T1 D14            | T1 D21            |          |          |
| <b>SORTORDER</b> | <b>BIOCHEMICAL NAME</b> |                                    |                   |                   |                   |                  |                  |                   |                   |          |          |
|                  | 935                     | 2-stearoylglycerophosphocholine*   | 0.142354          | 1.010002          | 0.770604          | 1.000000         | 1.235202         | 0.142354          | 1.503402          | 1.398572 | 3.314417 |
|                  | 821                     | 3-dehydrocarnitine*                | 0.999833          | 1.072591          | 1.049253          | 0.873041         | 1.188172         | 0.875033          | 1.054565          | 1.000167 | 0.926485 |
|                  | 170                     | 3-indoxyl sulfate                  | 0.627934          | 0.793543          | 0.590916          | 0.630024         | 0.759052         | 0.451256          | 0.569663          | 0.460182 | 0.750213 |
|                  | 172                     | 3-methyl-2-oxobutyrate             | 1.340545          | 1.640315          | 1.435467          | 1.000000         | 0.980369         | 0.682175          | 0.167871          | 0.167871 | 0.239328 |
|                  | 173                     | 3-methyl-2-oxovalerate             | 0.873059          | 1.139579          | 1.089805          | 1.017484         | 1.142921         | 0.840581          | 0.563238          | 0.323670 | 0.318889 |
|                  | 529                     | 3-phosphoglycerate                 | 1.238096          | 1.178441          | 0.514662          | 0.310980         | 0.370603         | 3.110964          | 1.987114          | 1.584618 | 0.649989 |
|                  | 193                     | 4-methyl-2-oxopentanoate           | 1.008235          | 1.345157          | 1.321313          | 0.956152         | 0.993652         | 0.850549          | 0.437402          | 0.239005 | 0.299811 |
|                  | 266                     | 5-methylthioadenosine (MTA)        | 0.372898          | 0.996410          | 1.157961          | 1.049878         | 0.959408         | 0.451807          | 1.213418          | 1.311506 | 1.104804 |
|                  | 282                     | 5-oxoproline                       | 0.191970          | 0.667539          | 1.022036          | 1.143684         | 1.980196         | 0.200106          | 0.775595          | 1.205515 | 1.344583 |
|                  | 545                     | 6-phosphogluconate                 | 0.644416          | 1.235349          | 0.565711          | 0.467849         | 0.841428         | 0.875263          | 0.723658          | 1.115971 | 0.467849 |
|                  | 1024                    | 7-beta-hydroxycholesterol          | 1.569456          | 0.476216          | 1.047089          | 0.363094         | 1.138381         | 1.318148          | 0.925294          | 1.004491 | 0.672304 |
|                  | 712.5                   | 9,10-epoxyoctadec-12(Z)-enoic acid | 0.048331          | 0.802532          | 1.027817          | 1.145545         | 1.713407         | 0.111045          | 0.854273          | 1.105050 | 1.152606 |
|                  | 672                     | 9,10-epoxystearate                 | 0.033463          | 0.809321          | 1.028911          | 1.006787         | 1.547654         | 0.037295          | 0.833233          | 1.227107 | 1.230720 |
|                  | 822                     | acetylcarnitine                    | 1.277266          | 1.241471          | 1.139287          | 0.923100         | 1.099697         | 1.062935          | 1.229760          | 1.029721 | 0.999643 |
|                  | 601                     | acetylphosphate                    | 0.990894          | 1.219679          | 1.245058          | 0.936207         | 1.064480         | 0.978169          | 1.080920          | 1.013816 | 1.010781 |
|                  | 1105                    | adenine                            | 1.206089          | 0.925700          | 0.570488          | 0.358702         | 0.327902         | 1.103432          | 1.211731          | 0.973460 | 0.761106 |
|                  | 1106                    | adenosine                          | 0.744577          | 0.753606          | 0.666923          | 0.982457         | 1.320279         | 0.672741          | 1.458001          | 1.480518 | 1.305395 |
|                  | 1116                    | adenosine 5'-diphosphate (ADP)     | 1.290323          | 1.033594          | 1.003406          | 0.792081         | 0.989024         | 0.877849          | 0.836119          | 0.722971 | 0.518700 |
|                  | 1232                    | adenosine 5'diphosphoribose        | 0.881198          | 1.041143          | 0.942067          | 0.721731         | 0.727361         | 0.884578          | 1.174893          | 0.958287 | 0.777991 |
|                  | 1114                    | adenosine 5'-monophosphate (AMP)   | 0.999976          | 1.000024          | 1.039602          | 1.036467         | 1.855358         | 0.636202          | 0.876975          | 0.658025 | 0.832007 |
|                  | 665                     | adrenate (22:4n6)                  | 1.314933          | 1.583554          | 0.741561          | 1.612064         | 1.808242         | 3.301831          | 0.570350          | 0.930507 | 1.460123 |
|                  | 27                      | alanine                            | 0.925090          | 1.241298          | 1.268784          | 1.069091         | 1.291588         | 0.863901          | 0.980929          | 0.900353 | 0.935163 |
|                  | 1150                    | allantoin                          | 2.172045          | 0.634390          | 0.708213          | 1.222934         | 1.518035         | 0.554513          | 1.000000          | 0.421193 | 1.093115 |
|                  | 179                     | alpha-hydroxyisocaproate           | 0.292412          | 0.292412          | 0.736097          | 0.903338         | 1.543100         | 0.292412          | 1.047084          | 1.661864 | 1.235539 |
|                  | 198                     | alpha-hydroxyisovalerate           | 0.603512          | 0.605749          | 0.724186          | 1.033939         | 1.838540         | 0.962598          | 2.580216          | 2.735497 | 2.628104 |
|                  | 1266                    | alpha-tocopherol                   | 0.878454          | 0.925404          | 0.797936          | 0.745309         | 0.803727         | 0.829351          | 0.726907          | 0.645369 | 0.589830 |
|                  | 1034                    | androsterone sulfate               | 1.375482          | 1.128043          | 1.233316          | 1.069587         | 1.439223         | 1.169557          | 1.403166          | 0.802192 | 1.043725 |
|                  | 566                     | arabinose                          | 0.961928          | 1.006028          | 1.133260          | 0.805106         | 1.072359         | 1.003430          | 1.236761          | 0.852454 | 1.009708 |
|                  | 546                     | arabitol                           | 0.957407          | 0.981489          | 0.854802          | 0.942624         | 1.021827         | 0.809730          | 1.389543          | 1.469408 | 1.373357 |
|                  | 1202                    | arabonate                          | 0.713833          | 1.138744          | 0.917448          | 0.725064         | 1.108036         | 0.862560          | 1.091336          | 0.779331 | 0.721375 |
|                  | 659                     | arachidonate (20:4n6)              | 0.567370          | 0.749888          | 0.915883          | 1.100946         | 1.845425         | 0.501375          | 0.837303          | 0.868220 | 1.270383 |
|                  | 241                     | arginine                           | 0.419416          | 1.012233          | 0.782343          | 0.781781         | 2.459407         | 0.726401          | 0.987767          | 1.098019 | 1.395338 |
|                  | 25                      | asparagine                         | 1.289194          | 1.350922          | 1.235291          | 0.963008         | 0.885318         | 1.316032          | 1.458511          | 1.100523 | 1.013047 |
|                  | 24                      | aspartate                          | 0.482904          | 0.605235          | 0.664009          | 0.701156         | 0.700856         | 0.901982          | 0.998569          | 0.973182 | 0.880816 |

|                  | DARM-00016                         | DARM-00017       | DARM-00018        | DARM-00019        | DARM-00020        | DARM-00021       | DARM-00022       | DARM-00023        | DARM-00024        |          |
|------------------|------------------------------------|------------------|-------------------|-------------------|-------------------|------------------|------------------|-------------------|-------------------|----------|
|                  | NHSCI 1866 T2                      | NHSCI 1866 T2    | NHSCI 1866 T2     | NHSCI 1866 T2     | NHSCI 1866 T2     | NHSCI 1866 T1    | NHSCI 1866 T1    | NHSCI 1866 T1     | NHSCI 1866 T1     |          |
|                  | 997715                             | 997736           | 997748            | 997740            | 997720            | 997746           | 997738           | 997739            | 997737            |          |
|                  | 991361                             | 991362           | 991363            | 991364            | 991365            | 991366           | 991367           | 991368            | 991369            |          |
|                  | NHSCI 1866 T2 D0                   | NHSCI 1866 T2 D7 | NHSCI 1866 T2 D14 | NHSCI 1866 T2 D21 | NHSCI 1866 T2 D28 | NHSCI 1866 T1 D0 | NHSCI 1866 T1 D7 | NHSCI 1866 T1 D14 | NHSCI 1866 T1 D21 |          |
|                  | 1866                               | 1866             | 1866              | 1866              | 1866              | 1866             | 1866             | 1866              | 1866              |          |
|                  | T2 D0                              | T2 D7            | T2 D14            | T2 D21            | T2 D28            | T1 D0            | T1 D7            | T1 D14            | T1 D21            |          |
|                  | 176.276                            | 164.34           | 172.339           | 203.125           | 169.237           | 179.08           | 165.545          | 173.574           | 171.422           |          |
| <b>PATHWAY</b>   | T2 D0                              | T2 D7            | T2 D14            | T2 D21            | T2 D28            | T1 D0            | T1 D7            | T1 D14            | T1 D21            |          |
| <b>SORTORDER</b> | <b>BIOCHEMICAL NAME</b>            |                  |                   |                   |                   |                  |                  |                   |                   |          |
| 721              | azelate (nonanedioate)             | 0.210289         | 0.662763          | 0.926046          | 1.242125          | 1.738198         | 0.194245         | 0.627354          | 0.838250          | 1.131933 |
| 26               | beta-alanine                       | 1.800861         | 1.724048          | 2.102594          | 1.327686          | 0.620389         | 1.560572         | 1.641957          | 1.528781          | 1.218936 |
| 7                | beta-hydroxypyruvate               | 0.554623         | 1.170740          | 1.065125          | 0.774761          | 1.085895         | 0.851838         | 0.948759          | 0.896470          | 0.672498 |
| 22               | betaine                            | 1.075655         | 1.201195          | 1.172755          | 0.990549          | 1.182740         | 1.077367         | 1.233125          | 1.200922          | 1.185297 |
| 1057             | beta-sitosterol                    | 1.378020         | 0.349092          | 0.349092          | 0.991994          | 1.072504         | 1.008006         | 1.095494          | 1.311701          | 1.145349 |
| 1216             | biliverdin                         | 0.798077         | 0.878080          | 1.794687          | 1.530214          | 1.488774         | 0.526687         | 2.688201          | 2.179164          | 3.642624 |
| 811              | butyrylcarnitine                   | 0.598389         | 0.958778          | 2.157606          | 0.813252          | 0.871551         | 1.646579         | 1.020169          | 0.598389          | 1.573956 |
| 1612             | caffeine                           | 1.263467         | 1.205485          | 1.133723          | 1.028486          | 1.065448         | 0.977868         | 1.113836          | 1.089265          | 1.113483 |
| 1059             | campesterol                        | 0.995934         | 1.087392          | 1.360507          | 0.878240          | 0.469755         | 0.469755         | 0.965511          | 0.932175          | 1.862319 |
| 622              | caprate (10:0)                     | 0.573585         | 1.046230          | 1.306931          | 0.964397          | 1.267035         | 0.562548         | 0.956619          | 0.989396          | 0.686388 |
| 618              | caproate (6:0)                     | 1.377155         | 1.529443          | 0.818669          | 0.740630          | 1.057454         | 0.842092         | 1.192223          | 0.436990          | 0.449683 |
| 620              | caprylate (8:0)                    | 0.632103         | 1.192723          | 1.199343          | 1.473919          | 1.580141         | 0.549565         | 1.849478          | 0.555594          | 1.076247 |
| 820              | carnitine                          | 1.005071         | 1.243940          | 1.211781          | 0.990124          | 1.252389         | 1.120270         | 1.232238          | 1.269324          | 1.234114 |
| 1300             | catechol sulfate                   | 0.971109         | 1.042230          | 0.964121          | 0.825281          | 1.012566         | 0.963242         | 1.081185          | 0.957620          | 0.955499 |
| 164              | C-glycosyltryptophan*              | 0.964929         | 0.988524          | 1.505223          | 1.076518          | 0.960933         | 0.909000         | 0.903513          | 1.108958          | 1.177757 |
| 1020             | cholesterol                        | 0.921397         | 1.080995          | 1.136624          | 0.915988          | 1.055749         | 1.021002         | 1.074846          | 0.969248          | 0.933694 |
| 881              | choline                            | 1.430515         | 1.578485          | 1.370786          | 1.249538          | 1.513476         | 1.427234         | 1.572337          | 1.549981          | 1.470633 |
| 582              | cis-aconitate                      | 0.723186         | 1.005069          | 1.011291          | 0.909410          | 1.206941         | 0.596630         | 0.994931          | 1.025652          | 1.052424 |
| 641              | cis-vaccenate (18:1n7)             | 0.494205         | 1.107788          | 0.457371          | 0.888823          | 0.680862         | 0.824207         | 1.910968          | 0.572285          | 1.190650 |
| 579              | citrate                            | 0.988956         | 0.973393          | 0.830051          | 0.659026          | 0.670119         | 1.049642         | 1.022152          | 0.712683          | 0.530010 |
| 248              | citrulline                         | 0.732821         | 0.941961          | 0.786135          | 0.851455          | 0.864658         | 0.802859         | 0.796177          | 0.861970          | 0.857194 |
| 259              | creatine                           | 1.072934         | 1.166761          | 1.122958          | 0.937071          | 1.135091         | 1.006465         | 1.162302          | 1.106957          | 1.105684 |
| 260              | creatinine                         | 1.061977         | 1.069059          | 1.025679          | 1.003797          | 1.119094         | 1.022388         | 1.004359          | 1.124995          | 1.052232 |
| 213              | cysteine                           | 0.470891         | 0.760858          | 1.162170          | 1.491504          | 1.826819         | 0.560433         | 0.521496          | 0.771319          | 1.150021 |
| 819              | deoxycarnitine                     | 1.094273         | 1.133404          | 1.290251          | 0.893564          | 1.142238         | 0.921844         | 1.122176          | 1.074504          | 1.038118 |
| 655              | dihomo-linoleate (20:2n6)          | 0.793124         | 0.988499          | 1.097323          | 1.094015          | 1.870038         | 0.669063         | 1.178471          | 1.411081          | 1.522516 |
| 609              | dihomo-linolenate (20:3n3 or n6)   | 0.727908         | 0.798627          | 0.794714          | 0.970348          | 1.443343         | 0.614837         | 0.822653          | 0.945218          | 1.180436 |
| 531              | dihydroxyacetone phosphate (DHAP)  | 0.239333         | 0.599793          | 0.239333          | 0.488592          | 0.239333         | 26.246931        | 58.469345         | 11.158892         | 0.239333 |
| 3                | dimethylglycine                    | 0.688915         | 0.979446          | 1.006086          | 1.513394          | 1.500375         | 0.945475         | 0.888860          | 1.069698          | 0.663023 |
| 613              | docosaehaenoate (DHA; 22:6n3)      | 0.443525         | 0.704866          | 1.067516          | 1.027216          | 1.493019         | 0.424190         | 0.972784          | 0.888162          | 1.129717 |
| 611              | docosapentaenoate (n3 DPA; 22:5n3) | 0.412333         | 0.748287          | 1.004777          | 0.999515          | 1.705677         | 0.429058         | 0.799325          | 1.033177          | 1.303055 |
| 610              | eicosapentaenoate (EPA; 20:5n3)    | 0.321751         | 0.775957          | 0.821262          | 0.908357          | 1.204325         | 0.830439         | 0.845855          | 0.986530          | 1.124767 |

|                  | DARM-00016                     | DARM-00017       | DARM-00018        | DARM-00019        | DARM-00020        | DARM-00021       | DARM-00022       | DARM-00023        | DARM-00024        |          |
|------------------|--------------------------------|------------------|-------------------|-------------------|-------------------|------------------|------------------|-------------------|-------------------|----------|
|                  | NHSCI 1866 T2                  | NHSCI 1866 T2    | NHSCI 1866 T2     | NHSCI 1866 T2     | NHSCI 1866 T2     | NHSCI 1866 T1    | NHSCI 1866 T1    | NHSCI 1866 T1     | NHSCI 1866 T1     |          |
|                  | 997715                         | 997736           | 997748            | 997740            | 997720            | 997746           | 997738           | 997739            | 997737            |          |
|                  | 991361                         | 991362           | 991363            | 991364            | 991365            | 991366           | 991367           | 991368            | 991369            |          |
|                  | NHSCI 1866 T2 D0               | NHSCI 1866 T2 D7 | NHSCI 1866 T2 D14 | NHSCI 1866 T2 D21 | NHSCI 1866 T2 D28 | NHSCI 1866 T1 D0 | NHSCI 1866 T1 D7 | NHSCI 1866 T1 D14 | NHSCI 1866 T1 D21 |          |
|                  | 1866                           | 1866             | 1866              | 1866              | 1866              | 1866             | 1866             | 1866              | 1866              |          |
|                  | T2 D0                          | T2 D7            | T2 D14            | T2 D21            | T2 D28            | T1 D0            | T1 D7            | T1 D14            | T1 D21            |          |
|                  | 176.276                        | 164.34           | 172.339           | 203.125           | 169.237           | 179.08           | 165.545          | 173.574           | 171.422           |          |
| <b>PATHWAY</b>   | T2 D0                          | T2 D7            | T2 D14            | T2 D21            | T2 D28            | T1 D0            | T1 D7            | T1 D14            | T1 D21            |          |
| <b>SORTORDER</b> | <b>BIOCHEMICAL NAME</b>        |                  |                   |                   |                   |                  |                  |                   |                   |          |
| 1565             | ergothioneine                  | 1.452924         | 1.344576          | 1.275889          | 1.069400          | 1.472451         | 1.073396         | 1.291689          | 1.193013          | 1.203446 |
| 735              | erucamide                      | 3.581430         | 0.412254          | 1.034310          | 1.012411          | 0.771882         | 3.075173         | 1.418402          | 0.954475          | 0.987589 |
| 1632             | erythritol                     | 0.519126         | 0.792453          | 0.939086          | 0.934951          | 1.221505         | 0.579283         | 1.018653          | 1.407544          | 1.829268 |
| 453              | erythronate*                   | 0.734372         | 0.917399          | 1.190023          | 0.992148          | 1.384581         | 0.722092         | 1.283408          | 2.038252          | 2.906687 |
| 876              | ethanolamine                   | 0.904855         | 1.058362          | 1.575824          | 1.160173          | 0.766092         | 0.641429         | 1.070066          | 1.023690          | 0.864240 |
| 472              | fructose                       | 0.832862         | 1.063905          | 1.090366          | 0.985075          | 1.071791         | 0.808681         | 0.655052          | 0.655034          | 1.014925 |
| 524              | fructose-6-phosphate           | 0.842078         | 1.023060          | 0.985739          | 0.610627          | 1.175219         | 0.397472         | 0.989227          | 1.233759          | 0.560529 |
| 594              | fumarate                       | 0.781422         | 0.947119          | 1.000480          | 0.953925          | 1.715840         | 0.714969         | 1.442458          | 1.524422          | 1.598409 |
| 404              | gamma-glutamylleucine          | 1.121323         | 0.725333          | 0.888391          | 0.715255          | 0.671972         | 1.195749         | 1.446832          | 1.080715          | 1.144540 |
| 521              | glucose                        | 0.966351         | 1.089534          | 1.062043          | 0.860784          | 1.077872         | 1.001462         | 1.073071          | 0.920134          | 0.881752 |
| 519              | glucose-6-phosphate (G6P)      | 0.840416         | 1.253397          | 0.936403          | 0.624125          | 1.266786         | 0.232264         | 0.169608          | 0.822482          | 1.058154 |
| 39               | glutamate                      | 1.199616         | 1.270962          | 1.300098          | 1.005913          | 1.373271         | 1.304027         | 1.469782          | 1.084066          | 0.904710 |
| 44               | glutamine                      | 1.337271         | 1.179785          | 1.064176          | 0.833892          | 0.794066         | 1.329939         | 1.055028          | 0.793461          | 0.702357 |
| 80               | glutaroyl carnitine            | 0.978552         | 1.283623          | 1.034547          | 1.086314          | 1.088812         | 0.798038         | 0.790916          | 0.794879          | 0.820006 |
| 283              | glutathione, oxidized (GSSG)   | 1.282356         | 1.172061          | 0.939052          | 0.697792          | 0.846550         | 1.488466         | 1.107346          | 0.891155          | 0.712402 |
| 280              | glutathione, reduced (GSH)     | 1.042456         | 0.972324          | 1.127807          | 0.880631          | 0.889339         | 1.072550         | 0.854247          | 1.037525          | 0.990698 |
| 517              | glycerate                      | 0.363275         | 0.725053          | 0.847936          | 1.003772          | 1.214712         | 0.541739         | 4.288396          | 7.798664          | 8.984795 |
| 882              | glycerol 3-phosphate (G3P)     | 1.223840         | 1.023186          | 0.963402          | 0.922959          | 0.970310         | 2.362033         | 3.554280          | 1.810766          | 0.819903 |
| 883              | glycerophosphorylcholine (GPC) | 0.950387         | 1.026028          | 0.960271          | 0.829710          | 0.952660         | 0.988479         | 1.021603          | 1.069304          | 1.057175 |
| 1                | glycine                        | 0.559408         | 0.959904          | 1.154372          | 1.129173          | 1.751983         | 0.641308         | 0.835534          | 0.828598          | 0.970613 |
| 851              | glycochenodeoxycholate         | 3.078268         | 2.166819          | 1.868720          | 1.863959          | 1.998294         | 1.908885         | 2.313250          | 2.062409          | 1.884735 |
| 840              | glycocholate                   | 1.218197         | 1.110704          | 1.093944          | 1.050813          | 1.312518         | 1.059299         | 1.222289          | 1.061226          | 1.039295 |
| 849              | glycodeoxycholate              | 1.281072         | 1.250581          | 1.126701          | 1.183213          | 1.347040         | 0.803958         | 1.031556          | 1.320247          | 1.045791 |
| 1318             | glycolate (hydroxyacetate)     | 0.782613         | 1.124610          | 1.104063          | 0.793728          | 0.883599         | 0.873721         | 0.956965          | 0.912868          | 0.848197 |
| 1128             | guanosine                      | 1.100134         | 1.140500          | 0.903265          | 0.453745          | 0.799816         | 0.863872         | 1.001799          | 0.986811          | 0.998201 |
| 1212             | heme*                          | 0.687347         | 1.852198          | 2.188751          | 1.072830          | 1.085982         | 1.021296         | 4.959563          | 2.869865          | 5.726540 |
| 619              | heptanoate (7:0)               | 0.879660         | 1.467036          | 1.036075          | 1.074240          | 1.385410         | 0.485282         | 1.212419          | 0.426742          | 0.502048 |
| 823              | hexanoylcarnitine              | 1.201647         | 0.853883          | 0.819349          | 0.629854          | 1.173287         | 0.870142         | 1.149399          | 0.684310          | 0.856738 |
| 1288             | hippurate                      | 1.017897         | 0.977590          | 0.943760          | 0.783767          | 0.945345         | 0.854317         | 1.058393          | 0.987116          | 0.970774 |
| 50               | histidine                      | 1.141519         | 1.147005          | 1.077978          | 0.874496          | 0.985874         | 1.113876         | 1.042943          | 1.004199          | 1.327249 |

| PATHWAY<br>SORTORDER | BIOCHEMICAL NAME                                                                      | DARM-00016                                                                           | DARM-00017                                                                          | DARM-00018                                                                             | DARM-00019                                                                             | DARM-00020                                                                             | DARM-00021                                                                          | DARM-00022                                                                           | DARM-00023                                                                             | DARM-00024                                                                             |
|----------------------|---------------------------------------------------------------------------------------|--------------------------------------------------------------------------------------|-------------------------------------------------------------------------------------|----------------------------------------------------------------------------------------|----------------------------------------------------------------------------------------|----------------------------------------------------------------------------------------|-------------------------------------------------------------------------------------|--------------------------------------------------------------------------------------|----------------------------------------------------------------------------------------|----------------------------------------------------------------------------------------|
|                      |                                                                                       | NHSCI 1866 T2<br>997715<br>991361<br>NHSCI 1866<br>T2 D0<br>1866<br>T2 D0<br>176.276 | NHSCI 1866 T2<br>997736<br>991362<br>NHSCI 1866<br>T2 D7<br>1866<br>T2 D7<br>164.34 | NHSCI 1866 T2<br>997748<br>991363<br>NHSCI 1866 T2<br>D14<br>1866<br>T2 D14<br>172.339 | NHSCI 1866 T2<br>997740<br>991364<br>NHSCI 1866 T2<br>D21<br>1866<br>T2 D21<br>203.125 | NHSCI 1866 T2<br>997720<br>991365<br>NHSCI 1866 T2<br>D28<br>1866<br>T2 D28<br>169.237 | NHSCI 1866 T1<br>997746<br>991366<br>NHSCI 1866<br>T1 D0<br>1866<br>T1 D0<br>179.08 | NHSCI 1866 T1<br>997738<br>991367<br>NHSCI 1866<br>T1 D7<br>1866<br>T1 D7<br>165.545 | NHSCI 1866 T1<br>997739<br>991368<br>NHSCI 1866 T1<br>D14<br>1866<br>T1 D14<br>173.574 | NHSCI 1866 T1<br>997737<br>991369<br>NHSCI 1866 T1<br>D21<br>1866<br>T1 D21<br>171.422 |
|                      |                                                                                       | T2 D0                                                                                | T2 D7                                                                               | T2 D14                                                                                 | T2 D21                                                                                 | T2 D28                                                                                 | T1 D0                                                                               | T1 D7                                                                                | T1 D14                                                                                 | T1 D21                                                                                 |
|                      | 231 homocysteine                                                                      | 0.283300                                                                             | 0.475163                                                                            | 1.007745                                                                               | 1.122871                                                                               | 1.114777                                                                               | 0.408054                                                                            | 0.583348                                                                             | 1.610877                                                                               | 1.466120                                                                               |
|                      | 1585 homostachydrine*                                                                 | 0.895599                                                                             | 0.913906                                                                            | 0.880724                                                                               | 0.910255                                                                               | 0.671347                                                                               | 0.987482                                                                            | 0.689098                                                                             | 0.792906                                                                               | 0.878708                                                                               |
|                      | 206 hydroxyisovaleroyl carnitine                                                      | 1.555557                                                                             | 1.475419                                                                            | 1.338186                                                                               | 1.257551                                                                               | 1.352897                                                                               | 1.136843                                                                            | 1.420923                                                                             | 1.271762                                                                               | 1.239892                                                                               |
|                      | 1098 hypoxanthine                                                                     | 0.067233                                                                             | 0.073749                                                                            | 0.376762                                                                               | 1.185439                                                                               | 2.880014                                                                               | 0.078254                                                                            | 5.826920                                                                             | 5.161455                                                                               | 4.634178                                                                               |
|                      | 1101 inosine 5'-monophosphate (IMP)<br>Isobar: fructose 1,6-diphosphate, glucose 1,6- | 0.569606                                                                             | 1.262374                                                                            | 1.856280                                                                               | 1.307858                                                                               | 1.828663                                                                               | 0.679147                                                                            | 0.892558                                                                             | 1.424407                                                                               | 2.152652                                                                               |
|                      | 527 diphosphate, myo-inositol 1,4 or 1,3-diphosphate                                  | 1.011434                                                                             | 1.150256                                                                            | 0.918173                                                                               | 0.689814                                                                               | 0.842561                                                                               | 2.681738                                                                            | 8.546598                                                                             | 1.371044                                                                               | 0.528261                                                                               |
|                      | 561 Isobar: ribulose 5-phosphate, xylulose 5-phosphate                                | 0.882393                                                                             | 1.017659                                                                            | 0.898523                                                                               | 0.590153                                                                               | 1.049265                                                                               | 4.434954                                                                            | 6.085914                                                                             | 2.878977                                                                               | 0.472048                                                                               |
|                      | 496 Isobar: sorbitol, mannitol                                                        | 0.983165                                                                             | 1.086215                                                                            | 0.998538                                                                               | 0.908520                                                                               | 1.046699                                                                               | 1.088187                                                                            | 1.105944                                                                             | 1.119317                                                                               | 1.096617                                                                               |
|                      | 200 isobutyrylcarnitine                                                               | 1.285879                                                                             | 1.298824                                                                            | 1.079126                                                                               | 0.912776                                                                               | 1.081439                                                                               | 1.094675                                                                            | 1.065939                                                                             | 0.983286                                                                               | 0.978169                                                                               |
|                      | 180 isoleucine                                                                        | 0.904508                                                                             | 1.100839                                                                            | 1.040173                                                                               | 0.921140                                                                               | 1.129414                                                                               | 0.892762                                                                            | 1.307340                                                                             | 1.307142                                                                               | 1.216562                                                                               |
|                      | 478 isomaltose                                                                        | 0.786380                                                                             | 1.470613                                                                            | 1.112872                                                                               | 0.903280                                                                               | 1.001079                                                                               | 1.957774                                                                            | 1.071817                                                                             | 0.792280                                                                               | 0.876707                                                                               |
|                      | 205 isovalerylcarnitine                                                               | 1.004065                                                                             | 1.102286                                                                            | 0.906413                                                                               | 0.836451                                                                               | 1.000485                                                                               | 0.947076                                                                            | 1.107538                                                                             | 1.012280                                                                               | 0.945728                                                                               |
|                      | 144 kynurenine                                                                        | 0.912488                                                                             | 1.340235                                                                            | 0.954535                                                                               | 1.068438                                                                               | 0.991351                                                                               | 1.296000                                                                            | 1.232886                                                                             | 1.155386                                                                               | 1.008649                                                                               |
|                      | 536 lactate                                                                           | 0.219858                                                                             | 0.713728                                                                            | 0.979672                                                                               | 0.987821                                                                               | 1.318691                                                                               | 0.314322                                                                            | 1.010858                                                                             | 1.297025                                                                               | 1.546916                                                                               |
|                      | 1018 lathosterol                                                                      | 0.489776                                                                             | 0.629410                                                                            | 0.658497                                                                               | 0.592428                                                                               | 0.489776                                                                               | 0.489776                                                                            | 0.489776                                                                             | 0.608806                                                                               | 0.696326                                                                               |
|                      | 625 laurate (12:0)                                                                    | 0.727765                                                                             | 0.893438                                                                            | 0.973073                                                                               | 0.883826                                                                               | 1.136358                                                                               | 0.847900                                                                            | 1.112136                                                                             | 1.135608                                                                               | 0.914981                                                                               |
|                      | 181 leucine                                                                           | 0.932373                                                                             | 1.154303                                                                            | 1.126427                                                                               | 0.983899                                                                               | 1.282916                                                                               | 0.846578                                                                            | 1.295956                                                                             | 1.243840                                                                               | 1.225019                                                                               |
|                      | 604 linoleate (18:2n6)                                                                | 0.740226                                                                             | 0.943546                                                                            | 1.047389                                                                               | 1.056420                                                                               | 1.532676                                                                               | 0.650377                                                                            | 1.235684                                                                             | 1.224176                                                                               | 1.457363                                                                               |
|                      | 608 linolenate [alpha or gamma; (18:3n3 or 6)]                                        | 0.514370                                                                             | 0.992250                                                                            | 1.010648                                                                               | 0.902997                                                                               | 1.476587                                                                               | 0.810550                                                                            | 1.197361                                                                             | 1.016417                                                                               | 1.293051                                                                               |
|                      | 69 lysine                                                                             | 1.071880                                                                             | 1.216980                                                                            | 1.212152                                                                               | 0.945992                                                                               | 0.959892                                                                               | 1.093781                                                                            | 1.223889                                                                             | 1.173469                                                                               | 1.016303                                                                               |
|                      | 598 malate                                                                            | 0.719036                                                                             | 1.045822                                                                            | 0.996498                                                                               | 0.974779                                                                               | 1.516162                                                                               | 0.587334                                                                            | 1.575855                                                                             | 1.668774                                                                               | 1.756515                                                                               |
|                      | 482 maltose                                                                           | 0.828407                                                                             | 1.022714                                                                            | 1.042451                                                                               | 0.797524                                                                               | 0.920378                                                                               | 0.974123                                                                            | 1.019700                                                                             | 0.894867                                                                               | 0.951805                                                                               |
|                      | 487 mannose                                                                           | 0.963028                                                                             | 1.086009                                                                            | 1.088833                                                                               | 0.852053                                                                               | 0.964234                                                                               | 1.056535                                                                            | 0.984285                                                                             | 0.854840                                                                               | 0.843114                                                                               |
|                      | 489 mannose-6-phosphate                                                               | 0.857830                                                                             | 0.961492                                                                            | 0.918527                                                                               | 0.645243                                                                               | 1.041229                                                                               | 0.446117                                                                            | 1.264991                                                                             | 1.171008                                                                               | 1.030862                                                                               |
|                      | 635 margarate (17:0)                                                                  | 0.751814                                                                             | 0.979277                                                                            | 1.057576                                                                               | 0.978154                                                                               | 1.787250                                                                               | 0.646236                                                                            | 1.032539                                                                             | 0.932111                                                                               | 1.116143                                                                               |



| PATHWAY | SORTORDER | BIOCHEMICAL NAME                              | DARM-00016       | DARM-00017       | DARM-00018        | DARM-00019        | DARM-00020        | DARM-00021       | DARM-00022       | DARM-00023        | DARM-00024        |
|---------|-----------|-----------------------------------------------|------------------|------------------|-------------------|-------------------|-------------------|------------------|------------------|-------------------|-------------------|
|         |           |                                               | NHSCI 1866 T2    | NHSCI 1866 T2    | NHSCI 1866 T2     | NHSCI 1866 T2     | NHSCI 1866 T2     | NHSCI 1866 T1    | NHSCI 1866 T1    | NHSCI 1866 T1     | NHSCI 1866 T1     |
|         |           |                                               | 997715           | 997736           | 997748            | 997740            | 997720            | 997746           | 997738           | 997739            | 997737            |
|         |           |                                               | 991361           | 991362           | 991363            | 991364            | 991365            | 991366           | 991367           | 991368            | 991369            |
|         |           |                                               | NHSCI 1866 T2 D0 | NHSCI 1866 T2 D7 | NHSCI 1866 T2 D14 | NHSCI 1866 T2 D21 | NHSCI 1866 T2 D28 | NHSCI 1866 T1 D0 | NHSCI 1866 T1 D7 | NHSCI 1866 T1 D14 | NHSCI 1866 T1 D21 |
|         |           |                                               | 1866             | 1866             | 1866              | 1866              | 1866              | 1866             | 1866             | 1866              | 1866              |
|         |           |                                               | T2 D0            | T2 D7            | T2 D14            | T2 D21            | T2 D28            | T1 D0            | T1 D7            | T1 D14            | T1 D21            |
|         |           |                                               | 176.276          | 164.34           | 172.339           | 203.125           | 169.237           | 179.08           | 165.545          | 173.574           | 171.422           |
|         |           |                                               | T2 D0            | T2 D7            | T2 D14            | T2 D21            | T2 D28            | T1 D0            | T1 D7            | T1 D14            | T1 D21            |
|         |           | 658 mead acid (20:3n9)                        | 1.023907         | 0.846368         | 0.429630          | 1.190257          | 0.598479          | 0.379121         | 0.684029         | 0.967622          | 0.849523          |
|         |           | 225 methionine                                | 1.484732         | 1.556007         | 1.093167          | 0.767968          | 0.785262          | 1.482286         | 1.429376         | 1.110052          | 0.844176          |
|         |           | 890 myo-inositol                              | 1.072864         | 1.183885         | 1.243195          | 1.018537          | 0.993139          | 1.270321         | 1.270127         | 1.000742          | 0.907486          |
|         |           | 629 myristate (14:0)                          | 0.632412         | 0.997450         | 1.040445          | 1.061978          | 1.389486          | 0.521104         | 1.087679         | 0.943317          | 0.982699          |
|         |           | 630 myristoleate (14:1n5)                     | 0.743900         | 0.493142         | 1.060393          | 1.029879          | 1.508858          | 0.639250         | 1.075540         | 1.430668          | 0.493142          |
|         |           | 1242.1 N1-Methyl-2-pyridone-5-carboxamide     | 0.650682         | 0.609814         | 0.677527          | 0.989965          | 0.738252          | 1.031610         | 0.579258         | 0.536434          | 0.725869          |
|         |           | 75 N-6-trimethyllysine                        | 1.368356         | 1.410117         | 1.042377          | 1.165226          | 1.206613          | 1.455469         | 1.235048         | 1.103404          | 1.239353          |
|         |           | 4 N-acetylglycine                             | 0.703126         | 1.015153         | 1.076402          | 0.584292          | 0.995851          | 0.943287         | 0.830171         | 0.820991          | 0.584292          |
|         |           | 227 N-acetylmethionine                        | 1.574492         | 0.950742         | 0.800527          | 1.350351          | 1.256783          | 0.843524         | 1.421345         | 0.800527          | 1.185046          |
|         |           | 455 N-acetylneuraminic acid                   | 0.497311         | 1.056485         | 1.021391          | 0.940026          | 1.107883          | 0.371034         | 1.073767         | 0.725931          | 1.412426          |
|         |           | 1221 nicotinamide                             | 0.814811         | 1.011838         | 0.898458          | 0.765642          | 1.170664          | 0.795070         | 1.157654         | 0.970815          | 1.156090          |
|         |           | 1224 nicotinamide adenine dinucleotide (NAD+) | 0.956705         | 1.272578         | 2.370546          | 1.934508          | 1.123941          | 2.371158         | 2.876988         | 0.880158          | 0.742219          |
|         |           | 825 octanoylcarnitine                         | 1.213300         | 1.314767         | 1.210047          | 1.106624          | 1.139082          | 0.836387         | 1.070222         | 1.119745          | 1.260096          |
|         |           | 639 oleate (18:1n9)                           | 0.986547         | 1.005248         | 1.308166          | 1.188103          | 1.170810          | 1.211565         | 1.315366         | 1.203807          | 1.278957          |
|         |           | 835 oleoylcarnitine                           | 0.489242         | 1.528689         | 2.466769          | 1.901271          | 2.201156          | 0.438430         | 4.465172         | 4.405629          | 10.564249         |
|         |           | 285 ophthalmate                               | 3.551742         | 1.265355         | 0.442083          | 0.317707          | 0.252181          | 4.305184         | 1.997412         | 1.021023          | 0.470232          |
|         |           | 244 ornithine                                 | 0.939261         | 1.143336         | 1.192263          | 0.931368          | 0.814906          | 0.869352         | 1.104434         | 1.057265          | 0.910761          |
|         |           | 632 palmitate (16:0)                          | 0.913437         | 0.969764         | 1.017147          | 0.903961          | 1.471748          | 0.676940         | 1.002933         | 0.999613          | 1.101544          |
|         |           | 633 palmitoleate (16:1n7)                     | 0.513091         | 0.815732         | 0.793765          | 1.124851          | 1.185019          | 0.732571         | 1.036071         | 1.231488          | 1.073138          |
|         |           | 1004 palmitoyl sphingomyelin                  | 0.961134         | 1.115795         | 1.186349          | 0.929576          | 1.078754          | 0.898686         | 1.139961         | 1.000592          | 0.874015          |
|         |           | 833 palmitoylcarnitine                        | 0.478760         | 1.196707         | 1.940597          | 1.450066          | 1.780151          | 0.407763         | 3.175823         | 2.972802          | 6.705207          |
|         |           | 1243 pantothenate                             | 0.945577         | 1.082141         | 1.026898          | 0.997117          | 1.059047          | 0.979483         | 1.114799         | 1.046370          | 0.905345          |
|         |           | 1613 paraxanthine                             | 0.758178         | 1.100879         | 1.023721          | 0.871267          | 0.959727          | 0.842121         | 1.043439         | 0.994415          | 0.898474          |
|         |           | 88 p-cresol sulfate                           | 0.759756         | 0.817534         | 0.774604          | 0.710700          | 0.748159          | 0.667677         | 0.813802         | 0.675227          | 0.695812          |
|         |           | 621 pelargonate (9:0)                         | 0.583328         | 1.344405         | 1.071773          | 1.040874          | 1.402575          | 0.410839         | 1.092199         | 0.658950          | 0.603910          |
|         |           | 631 pentadecanoate (15:0)                     | 0.739352         | 0.956042         | 1.038052          | 0.947417          | 1.428828          | 0.765198         | 1.088934         | 0.967923          | 1.196280          |
|         |           | 135 phenol sulfate                            | 0.974653         | 1.009513         | 0.907712          | 0.795517          | 0.979679          | 0.963932         | 1.153787         | 0.951593          | 0.898472          |
|         |           | 128 phenylacetylglutamine                     | 0.695259         | 0.726709         | 0.755868          | 0.584470          | 0.839592          | 0.707988         | 0.761715         | 0.664343          | 0.735338          |
|         |           | 83 phenylalanine                              | 0.727383         | 1.011808         | 0.990709          | 0.871037          | 1.030560          | 0.744195         | 1.023801         | 1.009952          | 0.959216          |
|         |           | 602 phosphate                                 | 0.892017         | 1.168188         | 1.181990          | 1.011836          | 1.172479          | 0.768304         | 0.703605         | 0.610242          | 0.773958          |
|         |           | 534 phosphoenolpyruvate (PEP)                 | 2.126739         | 1.031623         | 0.291297          | 0.193772          | 0.155305          | 4.071632         | 2.866429         | 1.887392          | 0.647512          |
|         |           | 877 phosphoethanolamine                       | 0.923308         | 1.072515         | 1.405192          | 1.003665          | 1.173373          | 1.634368         | 0.815893         | 1.129493          | 0.868065          |

| PATHWAY<br>SORTORDER | BIOCHEMICAL NAME                 | DARM-00016                                                                           | DARM-00017                                                                          | DARM-00018                                                                             | DARM-00019                                                                             | DARM-00020                                                                             | DARM-00021                                                                          | DARM-00022                                                                           | DARM-00023                                                                             | DARM-00024                                                                             |
|----------------------|----------------------------------|--------------------------------------------------------------------------------------|-------------------------------------------------------------------------------------|----------------------------------------------------------------------------------------|----------------------------------------------------------------------------------------|----------------------------------------------------------------------------------------|-------------------------------------------------------------------------------------|--------------------------------------------------------------------------------------|----------------------------------------------------------------------------------------|----------------------------------------------------------------------------------------|
|                      |                                  | NHSCI 1866 T2<br>997715<br>991361<br>NHSCI 1866<br>T2 D0<br>1866<br>T2 D0<br>176.276 | NHSCI 1866 T2<br>997736<br>991362<br>NHSCI 1866<br>T2 D7<br>1866<br>T2 D7<br>164.34 | NHSCI 1866 T2<br>997748<br>991363<br>NHSCI 1866 T2<br>D14<br>1866<br>T2 D14<br>172.339 | NHSCI 1866 T2<br>997740<br>991364<br>NHSCI 1866 T2<br>D21<br>1866<br>T2 D21<br>203.125 | NHSCI 1866 T2<br>997720<br>991365<br>NHSCI 1866 T2<br>D28<br>1866<br>T2 D28<br>169.237 | NHSCI 1866 T1<br>997746<br>991366<br>NHSCI 1866<br>T1 D0<br>1866<br>T1 D0<br>179.08 | NHSCI 1866 T1<br>997738<br>991367<br>NHSCI 1866<br>T1 D7<br>1866<br>T1 D7<br>165.545 | NHSCI 1866 T1<br>997739<br>991368<br>NHSCI 1866 T1<br>D14<br>1866<br>T1 D14<br>173.574 | NHSCI 1866 T1<br>997737<br>991369<br>NHSCI 1866 T1<br>D21<br>1866<br>T1 D21<br>171.422 |
|                      |                                  | T2 D0                                                                                | T2 D7                                                                               | T2 D14                                                                                 | T2 D21                                                                                 | T2 D28                                                                                 | T1 D0                                                                               | T1 D7                                                                                | T1 D14                                                                                 | T1 D21                                                                                 |
|                      | 74 pipercolate                   | 0.795467                                                                             | 1.110439                                                                            | 0.866838                                                                               | 0.747487                                                                               | 1.142169                                                                               | 0.935262                                                                            | 1.097380                                                                             | 0.972062                                                                               | 1.037049                                                                               |
|                      | 1531 piperine                    | 1.794483                                                                             | 1.780262                                                                            | 1.038199                                                                               | 1.033156                                                                               | 0.917698                                                                               | 1.041107                                                                            | 1.759989                                                                             | 1.271048                                                                               | 1.495063                                                                               |
|                      | 246 proline                      | 1.013856                                                                             | 1.046929                                                                            | 0.983892                                                                               | 0.909081                                                                               | 1.180662                                                                               | 0.879096                                                                            | 1.020036                                                                             | 1.005501                                                                               | 1.005694                                                                               |
|                      | 809 propionylcarnitine           | 1.652190                                                                             | 1.517885                                                                            | 1.303306                                                                               | 1.078465                                                                               | 1.254020                                                                               | 1.376766                                                                            | 1.343697                                                                             | 1.097893                                                                               | 1.001871                                                                               |
|                      | 1181 pseudouridine               | 0.918881                                                                             | 1.108099                                                                            | 0.880978                                                                               | 0.734292                                                                               | 1.010960                                                                               | 0.570276                                                                            | 0.967920                                                                             | 1.152684                                                                               | 0.804972                                                                               |
|                      | 45 pyroglutamine*                | 1.505178                                                                             | 1.739141                                                                            | 1.525632                                                                               | 1.340829                                                                               | 1.820351                                                                               | 1.569546                                                                            | 1.742140                                                                             | 1.800413                                                                               | 1.531138                                                                               |
|                      | 603 pyrophosphate (PPi)          | 1.619585                                                                             | 2.014208                                                                            | 0.944148                                                                               | 0.725752                                                                               | 0.421184                                                                               | 2.803005                                                                            | 1.259798                                                                             | 1.055006                                                                               | 0.657354                                                                               |
|                      | 535 pyruvate                     | 2.169760                                                                             | 2.358569                                                                            | 1.015010                                                                               | 0.542479                                                                               | 0.747050                                                                               | 0.065020                                                                            | 0.039915                                                                             | 0.108379                                                                               | 2.064760                                                                               |
|                      | 1469 ranitidine                  | 0.811072                                                                             | 0.811072                                                                            | 0.811072                                                                               | 0.811072                                                                               | 0.811072                                                                               | 0.811072                                                                            | 0.811072                                                                             | 0.811072                                                                               | 0.811072                                                                               |
|                      | 548 ribitol                      | 0.746264                                                                             | 1.290269                                                                            | 0.602225                                                                               | 0.875069                                                                               | 1.077702                                                                               | 0.777809                                                                            | 4.827632                                                                             | 6.291121                                                                               | 5.674953                                                                               |
|                      | 557 ribose 5-phosphate           | 0.941880                                                                             | 0.887955                                                                            | 0.857664                                                                               | 0.877680                                                                               | 0.767096                                                                               | 2.235521                                                                            | 3.494890                                                                             | 1.843313                                                                               | 0.662457                                                                               |
|                      | 559 ribulose                     | 1.233137                                                                             | 0.777685                                                                            | 0.776057                                                                               | 0.705694                                                                               | 1.603587                                                                               | 1.000000                                                                            | 6.182086                                                                             | 4.766923                                                                               | 1.423436                                                                               |
|                      | 224 S-adenosylhomocysteine (SAH) | 0.670923                                                                             | 1.173121                                                                            | 0.990527                                                                               | 0.908534                                                                               | 1.327612                                                                               | 0.585667                                                                            | 1.009473                                                                             | 1.159935                                                                               | 0.868522                                                                               |
|                      | 551 sedoheptulose-7-phosphate    | 0.312007                                                                             | 1.297012                                                                            | 1.479980                                                                               | 0.603954                                                                               | 1.226593                                                                               | 0.074096                                                                            | 0.093846                                                                             | 0.074096                                                                               | 0.594090                                                                               |
|                      | 8 serine                         | 0.961744                                                                             | 1.266789                                                                            | 1.218023                                                                               | 1.025300                                                                               | 1.216261                                                                               | 0.987967                                                                            | 1.253440                                                                             | 1.178263                                                                               | 1.160987                                                                               |
|                      | 216 S-methylcysteine             | 0.562773                                                                             | 0.607159                                                                            | 0.428310                                                                               | 0.887603                                                                               | 0.734662                                                                               | 0.539099                                                                            | 0.677550                                                                             | 0.470051                                                                               | 0.581260                                                                               |
|                      | 281 S-methylglutathione          | 0.690237                                                                             | 1.587726                                                                            | 0.966433                                                                               | 0.923935                                                                               | 0.742056                                                                               | 0.810818                                                                            | 1.399870                                                                             | 1.538145                                                                               | 0.995664                                                                               |
|                      | 270 spermidine                   | 1.062502                                                                             | 1.289947                                                                            | 1.218212                                                                               | 1.044024                                                                               | 1.280570                                                                               | 0.922495                                                                            | 1.182150                                                                             | 1.071928                                                                               | 1.063963                                                                               |
|                      | 1584 stachydrine                 | 2.095102                                                                             | 2.330842                                                                            | 2.110076                                                                               | 1.839202                                                                               | 2.319102                                                                               | 1.922350                                                                            | 2.249901                                                                             | 2.111208                                                                               | 2.184161                                                                               |
|                      | 637 stearate (18:0)              | 0.843957                                                                             | 1.055444                                                                            | 1.084165                                                                               | 0.975553                                                                               | 1.556442                                                                               | 0.642299                                                                            | 1.004454                                                                             | 0.976885                                                                               | 1.077237                                                                               |
|                      | 1005 stearoyl sphingomyelin      | 0.865486                                                                             | 0.911076                                                                            | 1.080005                                                                               | 0.786180                                                                               | 0.917909                                                                               | 0.922069                                                                            | 1.172109                                                                             | 0.914078                                                                               | 0.903442                                                                               |
|                      | 834 stearoylcarnitine            | 0.406720                                                                             | 1.136923                                                                            | 2.020013                                                                               | 1.656963                                                                               | 1.843958                                                                               | 0.310522                                                                            | 3.205297                                                                             | 2.808168                                                                               | 6.886410                                                                               |
|                      | 591 succinylcarnitine            | 1.183375                                                                             | 1.337074                                                                            | 1.301392                                                                               | 1.084051                                                                               | 1.445426                                                                               | 1.037728                                                                            | 1.223270                                                                             | 1.260462                                                                               | 1.322879                                                                               |
|                      | 1662 terephthalic acid           | 1.182466                                                                             | 1.144063                                                                            | 1.345530                                                                               | 1.147011                                                                               | 1.371383                                                                               | 1.214571                                                                            | 1.404467                                                                             | 1.103014                                                                               | 1.189349                                                                               |
|                      | 1614 theobromine                 | 0.686930                                                                             | 0.607131                                                                            | 1.420081                                                                               | 0.695816                                                                               | 1.002863                                                                               | 0.642601                                                                            | 0.744874                                                                             | 0.658977                                                                               | 0.784564                                                                               |
|                      | 1615 theophylline                | 0.857493                                                                             | 0.841441                                                                            | 0.852026                                                                               | 1.044626                                                                               | 1.110884                                                                               | 0.661419                                                                            | 0.868306                                                                             | 0.828888                                                                               | 0.440691                                                                               |
|                      | 549 threitol                     | 0.605065                                                                             | 0.800077                                                                            | 0.887474                                                                               | 0.757795                                                                               | 0.899228                                                                               | 0.740354                                                                            | 1.046007                                                                             | 1.065307                                                                               | 1.030688                                                                               |
|                      | 1199 threonate                   | 0.884623                                                                             | 1.056487                                                                            | 1.001604                                                                               | 0.909616                                                                               | 1.062214                                                                               | 0.921414                                                                            | 0.909397                                                                             | 1.018455                                                                               | 1.052177                                                                               |
|                      | 17 threonine                     | 0.993623                                                                             | 1.330512                                                                            | 1.399478                                                                               | 1.081520                                                                               | 1.268171                                                                               | 1.056761                                                                            | 1.242720                                                                             | 1.244335                                                                               | 1.182913                                                                               |
|                      | 252 trans-4-hydroxyproline       | 0.814001                                                                             | 0.774311                                                                            | 0.829652                                                                               | 0.849252                                                                               | 0.805627                                                                               | 0.572124                                                                            | 0.905691                                                                             | 0.920689                                                                               | 0.768722                                                                               |

|  | DARM-00016       | DARM-00017       | DARM-00018        | DARM-00019        | DARM-00020        | DARM-00021       | DARM-00022       | DARM-00023        | DARM-00024        |
|--|------------------|------------------|-------------------|-------------------|-------------------|------------------|------------------|-------------------|-------------------|
|  | NHSCI 1866 T2    | NHSCI 1866 T2    | NHSCI 1866 T2     | NHSCI 1866 T2     | NHSCI 1866 T2     | NHSCI 1866 T1    | NHSCI 1866 T1    | NHSCI 1866 T1     | NHSCI 1866 T1     |
|  | 997715           | 997736           | 997748            | 997740            | 997720            | 997746           | 997738           | 997739            | 997737            |
|  | 991361           | 991362           | 991363            | 991364            | 991365            | 991366           | 991367           | 991368            | 991369            |
|  | NHSCI 1866 T2 D0 | NHSCI 1866 T2 D7 | NHSCI 1866 T2 D14 | NHSCI 1866 T2 D21 | NHSCI 1866 T2 D28 | NHSCI 1866 T1 D0 | NHSCI 1866 T1 D7 | NHSCI 1866 T1 D14 | NHSCI 1866 T1 D21 |
|  | 1866             | 1866             | 1866              | 1866              | 1866              | 1866             | 1866             | 1866              | 1866              |
|  | T2 D0            | T2 D7            | T2 D14            | T2 D21            | T2 D28            | T1 D0            | T1 D7            | T1 D14            | T1 D21            |
|  | 176.276          | 164.34           | 172.339           | 203.125           | 169.237           | 179.08           | 165.545          | 173.574           | 171.422           |
|  | T2 D0            | T2 D7            | T2 D14            | T2 D21            | T2 D28            | T1 D0            | T1 D7            | T1 D14            | T1 D21            |

**PATHWAY**

**SORTORDER BIOCHEMICAL NAME**

|                                         |          |          |          |          |          |          |          |          |          |
|-----------------------------------------|----------|----------|----------|----------|----------|----------|----------|----------|----------|
| 501 trehalose                           | 0.201019 | 0.850848 | 1.406976 | 1.468295 | 1.387215 | 0.238892 | 0.629188 | 0.817213 | 1.234079 |
| 1242 trigonelline (N'-methylnicotinate) | 1.272694 | 1.372181 | 1.291222 | 1.128886 | 1.249649 | 1.237602 | 1.396669 | 1.306094 | 1.279538 |
| 145 tryptophan                          | 0.817334 | 1.095493 | 1.015031 | 0.924403 | 0.989748 | 0.804220 | 1.055440 | 1.011476 | 0.975269 |
| 151 tryptophan betaine                  | 1.603943 | 1.661904 | 1.530906 | 1.330058 | 1.623229 | 1.330451 | 1.600966 | 1.481023 | 1.493108 |
| 99 tyrosine                             | 0.968936 | 1.194225 | 1.180995 | 1.056896 | 1.208565 | 0.998173 | 1.229578 | 1.191890 | 1.152029 |
| 1149 urate                              | 1.265110 | 1.161604 | 0.988206 | 0.854142 | 1.073201 | 1.089558 | 1.119075 | 0.882419 | 0.904778 |
| 245 urea                                | 0.800316 | 1.026784 | 0.987892 | 0.812787 | 0.956288 | 0.823694 | 0.991944 | 0.845993 | 0.855559 |
| 1180 uridine                            | 0.831653 | 0.991532 | 1.096638 | 1.024148 | 1.473673 | 0.814876 | 1.395201 | 1.248259 | 1.136566 |
| 190 valine                              | 0.972327 | 1.166725 | 1.181283 | 0.977507 | 1.158445 | 0.943391 | 1.185855 | 1.083818 | 1.099776 |
| 565 xylitol                             | 0.127693 | 0.127693 | 0.127693 | 0.176147 | 0.127693 | 0.127693 | 3.035000 | 3.016489 | 1.694447 |
| 570 xylonate                            | 0.859141 | 0.700778 | 1.047475 | 0.881897 | 0.844633 | 0.663354 | 1.184012 | 1.286874 | 1.494055 |
| 569 xylose                              | 0.405368 | 1.222699 | 0.857077 | 0.405368 | 1.423885 | 0.779886 | 1.196334 | 2.876936 | 3.427724 |

|                  | DARM-00025                                        | DARM-00026   | DARM-00027   | DARM-00028   | DARM-00029   | DARM-00030   |          |
|------------------|---------------------------------------------------|--------------|--------------|--------------|--------------|--------------|----------|
|                  | NHSCI 1866 T1                                     | NHSCI 1866 C |          |
|                  | 997732                                            | 997735       | 997723       | 997728       | 997722       | 997744       |          |
|                  | 991370                                            | 991371       | 991372       | 991373       | 991374       | 991375       |          |
|                  | NHSCI 1866 T1                                     | NHSCI 1866 C | NHSCI 1866 C | NHSCI 1866   | NHSCI 1866 C | NHSCI 1866 C |          |
|                  | D28                                               | D0           | D7           | C D14        | D21          | D28          |          |
|                  | 1866                                              | 1866         | 1866         | 1866         | 1866         | 1866         |          |
|                  | T1 D28                                            | C D0         | C D7         | C D14        | C D21        | C D28        |          |
|                  | 155.949                                           | 177.522      | 181.946      | 180.175      | 185.286      | 186.197      |          |
| <b>PATHWAY</b>   | T1 D28                                            | C D0         | C D7         | C D14        | C D21        | C D28        |          |
| <b>SORTORDER</b> | <b>BIOCHEMICAL NAME</b>                           |              |              |              |              |              |          |
| 905              | 1,2-propanediol                                   | 1.962303     | 0.563461     | 0.773673     | 1.188689     | 1.091823     | 1.385370 |
| 532              | 1,3-dihydroxyacetone                              | 0.936173     | 0.879981     | 0.749898     | 0.994428     | 0.706877     | 1.082746 |
| 515              | 1,5-anhydroglucitol (1,5-AG)                      | 1.009787     | 1.012087     | 0.746767     | 0.869682     | 0.821318     | 0.777494 |
| 523              | 1,6-anhydroglucose                                | 1.364420     | 1.297502     | 0.891604     | 0.915285     | 0.763173     | 0.988839 |
| 636              | 10-heptadecenoate (17:1n7)                        | 1.403745     | 0.828227     | 1.043206     | 1.049363     | 1.261397     | 0.927437 |
| 742              | 13-methylmyristic acid                            | 1.530483     | 0.603959     | 1.018858     | 1.136946     | 1.039832     | 0.979638 |
| 744              | 15-methylpalmitate (isobar with 2-                | 1.495298     | 0.533960     | 0.933209     | 0.938384     | 1.364927     | 1.003488 |
| 919              | 1-arachidonoylglycerophosphoethanolamine*         | 0.818711     | 1.309575     | 1.237829     | 1.010712     | 1.061398     | 0.783981 |
| 938              | 1-linoleoylglycerophosphocholine                  | 1.056072     | 0.968415     | 1.238837     | 1.016508     | 1.211700     | 0.809547 |
| 926              | 1-myristoylglycerophosphocholine                  | 0.936136     | 0.416175     | 0.416175     | 0.923876     | 0.678494     | 3.272995 |
| 936              | 1-oleoylglycerophosphocholine                     | 1.791263     | 0.077483     | 0.290619     | 0.924987     | 1.459732     | 5.534157 |
| 915              | 1-oleoylglycerophosphoethanolamine                | 1.366971     | 1.344172     | 1.065000     | 0.798952     | 1.261417     | 0.814458 |
| 970              | 1-palmitoylglycerol (1-monopalmitin)              | 0.861226     | 0.719199     | 0.876449     | 1.356011     | 1.035025     | 1.231294 |
| 929              | 1-palmitoylglycerophosphocholine                  | 1.718517     | 0.043437     | 0.315703     | 0.885723     | 1.491287     | 3.485666 |
| 909              | 1-palmitoylglycerophosphoethanolamine             | 0.561704     | 0.957055     | 0.992772     | 1.007228     | 0.741135     | 0.624214 |
| 934              | 1-stearoylglycerophosphocholine                   | 1.557930     | 0.038298     | 0.255335     | 0.766923     | 1.059703     | 4.757974 |
| 533              | 2,3-diphosphoglycerate                            | 0.260365     | 2.813990     | 1.000000     | 0.192421     | 0.036846     | 0.034709 |
| 263              | 2-aminobutyrate                                   | 1.440552     | 1.146852     | 1.057026     | 1.246625     | 0.998962     | 1.096195 |
| 945              | 2-arachidonoylglycerophosphocholine*              | 1.000000     | 0.185345     | 0.301695     | 0.661601     | 0.866965     | 3.947168 |
| 920              | 2-arachidonoylglycerophosphoethanolamine*         | 1.490698     | 0.067699     | 0.312859     | 0.887969     | 1.189819     | 3.367121 |
| 923              | 2-docosahexaenoylglycerophosphoethanolamine*      | 1.305922     | 0.136031     | 0.529947     | 1.146430     | 1.051838     | 3.821691 |
| 922              | 2-docosapentaenoylglycerophosphoethanolamine*     | 1.294222     | 0.089145     | 0.328395     | 1.000000     | 1.111352     | 3.272113 |
| 1360             | 2-ethylhexanoate (isobar with 2-propylpentanoate) | 0.580689     | 0.854823     | 1.005285     | 0.956193     | 0.542068     | 0.568130 |
| 229              | 2-hydroxybutyrate (AHB)                           | 1.160729     | 1.040493     | 1.021836     | 1.108594     | 0.868716     | 1.077310 |
| 714              | 2-hydroxyglutarate                                | 3.238803     | 0.844283     | 0.759518     | 1.171081     | 1.299516     | 1.817171 |
| 706              | 2-hydroxypalmitate                                | 1.355718     | 0.759887     | 1.030246     | 0.884788     | 1.132533     | 0.823016 |
| 939              | 2-linoleoylglycerophosphocholine*                 | 1.221832     | 0.229996     | 0.528060     | 0.694372     | 1.005246     | 3.306186 |
| 202              | 2-methylbutyrylcarnitine                          | 0.994122     | 1.280913     | 1.280844     | 1.029904     | 1.430659     | 0.715979 |
| 937              | 2-oleoylglycerophosphocholine*                    | 1.015496     | 0.191712     | 0.351808     | 0.683406     | 0.837879     | 3.361709 |
| 930              | 2-palmitoylglycerophosphocholine*                 | 1.189122     | 0.108070     | 0.343618     | 0.804478     | 0.960570     | 4.302079 |

|                  | DARM-00025                         | DARM-00026   | DARM-00027   | DARM-00028   | DARM-00029   | DARM-00030   |          |
|------------------|------------------------------------|--------------|--------------|--------------|--------------|--------------|----------|
|                  | NHSCI 1866 T1                      | NHSCI 1866 C |          |
|                  | 997732                             | 997735       | 997723       | 997728       | 997722       | 997744       |          |
|                  | 991370                             | 991371       | 991372       | 991373       | 991374       | 991375       |          |
|                  | NHSCI 1866 T1                      | NHSCI 1866 C |          |
|                  | D28                                | D0           | D7           | C D14        | D21          | D28          |          |
|                  | 1866                               | 1866         | 1866         | 1866         | 1866         | 1866         |          |
|                  | T1 D28                             | C D0         | C D7         | C D14        | C D21        | C D28        |          |
|                  | 155.949                            | 177.522      | 181.946      | 180.175      | 185.286      | 186.197      |          |
| <b>PATHWAY</b>   | T1 D28                             | C D0         | C D7         | C D14        | C D21        | C D28        |          |
| <b>SORTORDER</b> | <b>BIOCHEMICAL NAME</b>            |              |              |              |              |              |          |
| 935              | 2-stearoylglycerophosphocholine*   | 1.071904     | 0.142354     | 0.142354     | 0.503256     | 0.579957     | 3.726528 |
| 821              | 3-dehydrocarnitine*                | 1.112274     | 0.902835     | 0.999223     | 0.985691     | 0.960373     | 0.956818 |
| 170              | 3-indoxyl sulfate                  | 0.666928     | 0.604031     | 0.615128     | 0.532224     | 0.389686     | 0.720274 |
| 172              | 3-methyl-2-oxobutyrate             | 0.167871     | 1.492745     | 1.369522     | 1.331473     | 0.963997     | 0.869145 |
| 173              | 3-methyl-2-oxovalerate             | 0.486341     | 0.996945     | 1.003055     | 1.166572     | 1.063349     | 0.910344 |
| 529              | 3-phosphoglycerate                 | 0.647234     | 1.177113     | 0.882247     | 0.807327     | 0.436468     | 0.391823 |
| 193              | 4-methyl-2-oxopentanoate           | 0.449847     | 1.070740     | 1.090726     | 1.196609     | 0.894189     | 0.765792 |
| 266              | 5-methylthioadenosine (MTA)        | 1.135995     | 0.433355     | 0.631642     | 1.003590     | 0.854859     | 0.941843 |
| 282              | 5-oxoproline                       | 1.600759     | 0.187985     | 0.602352     | 0.977964     | 1.194557     | 1.410001 |
| 545              | 6-phosphogluconate                 | 0.487973     | 1.565474     | 0.794300     | 0.467849     | 0.467849     | 0.467849 |
| 1024             | 7-beta-hydroxycholesterol          | 0.866651     | 0.666341     | 0.728016     | 1.146114     | 0.995509     | 0.459523 |
| 712.5            | 9,10-epoxyoctadec-12(Z)-enoic acid | 1.720280     | 0.097580     | 0.679865     | 0.867279     | 1.228049     | 1.272163 |
| 672              | 9,10-epoxystearate                 | 1.820843     | 0.057486     | 0.753563     | 0.940167     | 1.264035     | 1.214890 |
| 822              | acetylcarnitine                    | 1.080696     | 1.169595     | 1.123487     | 1.071160     | 1.080324     | 1.000358 |
| 601              | acetylphosphate                    | 1.118297     | 0.885714     | 0.898878     | 1.057195     | 0.821014     | 0.939531 |
| 1105             | adenine                            | 0.538223     | 1.228781     | 1.016980     | 0.744226     | 0.637906     | 0.576433 |
| 1106             | adenosine                          | 1.484763     | 1.519858     | 0.977006     | 0.997186     | 1.758229     | 0.934218 |
| 1116             | adenosine 5'-diphosphate (ADP)     | 0.561842     | 1.144367     | 1.183384     | 1.041595     | 0.821974     | 0.580406 |
| 1232             | adenosine 5'diphosphoribose        | 0.708303     | 0.862716     | 0.900600     | 0.803150     | 0.797305     | 0.643408 |
| 1114             | adenosine 5'-monophosphate (AMP)   | 1.416475     | 0.782735     | 1.014159     | 1.210037     | 1.393270     | 1.260668 |
| 665              | adrenate (22:4n6)                  | 1.653082     | 0.472529     | 0.964801     | 0.866192     | 1.015034     | 1.199391 |
| 27               | alanine                            | 1.205319     | 0.999386     | 1.011664     | 1.222115     | 0.967846     | 1.076178 |
| 1150             | allantoin                          | 1.338042     | 1.943129     | 0.966256     | 0.421193     | 0.614564     | 0.949476 |
| 179              | alpha-hydroxyisocaproate           | 1.767613     | 0.292412     | 0.292412     | 0.497329     | 0.810051     | 1.156211 |
| 198              | alpha-hydroxyisovalerate           | 3.656355     | 0.558210     | 0.529065     | 0.758533     | 0.929130     | 1.172533 |
| 1266             | alpha-tocopherol                   | 1.013168     | 0.904921     | 0.692161     | 0.981713     | 0.568316     | 0.646692 |
| 1034             | androsterone sulfate               | 1.383558     | 0.854975     | 1.245888     | 1.097636     | 1.010608     | 1.409117 |
| 566              | arabinose                          | 1.238260     | 0.836238     | 0.991687     | 0.973576     | 0.760419     | 0.742416 |
| 546              | arabitol                           | 1.807193     | 0.971075     | 0.772679     | 0.834015     | 0.734172     | 0.998135 |
| 1202             | arabonate                          | 0.825139     | 0.639898     | 1.012679     | 0.964548     | 0.658951     | 0.999669 |
| 659              | arachidonate (20:4n6)              | 2.044924     | 0.846104     | 0.978080     | 1.005465     | 1.371726     | 1.095372 |
| 241              | arginine                           | 1.696769     | 0.576222     | 1.317440     | 1.745899     | 1.514322     | 0.569095 |
| 25               | asparagine                         | 1.289376     | 1.143792     | 0.995290     | 1.119770     | 0.782254     | 1.004710 |
| 24               | aspartate                          | 0.830984     | 0.667982     | 0.474023     | 0.627891     | 0.587960     | 0.753229 |

|                  | DARM-00025                         | DARM-00026   | DARM-00027   | DARM-00028   | DARM-00029   | DARM-00030   |          |
|------------------|------------------------------------|--------------|--------------|--------------|--------------|--------------|----------|
|                  | NHSCI 1866 T1                      | NHSCI 1866 C |          |
|                  | 997732                             | 997735       | 997723       | 997728       | 997722       | 997744       |          |
|                  | 991370                             | 991371       | 991372       | 991373       | 991374       | 991375       |          |
|                  | NHSCI 1866 T1                      | NHSCI 1866 C |          |
|                  | D28                                | D0           | D7           | C D14        | D21          | D28          |          |
|                  | 1866                               | 1866         | 1866         | 1866         | 1866         | 1866         |          |
|                  | T1 D28                             | C D0         | C D7         | C D14        | C D21        | C D28        |          |
|                  | 155.949                            | 177.522      | 181.946      | 180.175      | 185.286      | 186.197      |          |
| <b>PATHWAY</b>   | T1 D28                             | C D0         | C D7         | C D14        | C D21        | C D28        |          |
| <b>SORTORDER</b> | <b>BIOCHEMICAL NAME</b>            |              |              |              |              |              |          |
| 721              | azelate (nonanedioate)             | 1.838439     | 0.145765     | 0.453006     | 0.814958     | 1.152765     | 1.340694 |
| 26               | beta-alanine                       | 1.923831     | 1.530797     | 0.767572     | 0.839805     | 0.717139     | 1.777530 |
| 7                | beta-hydroxypyruvate               | 1.016385     | 1.021221     | 0.827159     | 1.119480     | 0.499616     | 0.767661 |
| 22               | betaine                            | 1.333675     | 1.118360     | 1.082670     | 1.161894     | 1.093691     | 1.098355 |
| 1057             | beta-sitosterol                    | 1.139472     | 0.686697     | 1.093839     | 1.275950     | 0.861017     | 0.741912 |
| 1216             | biliverdin                         | 1.070354     | 0.565964     | 0.741221     | 0.522259     | 1.000000     | 1.436399 |
| 811              | butrylcarnitine                    | 0.841708     | 0.952815     | 1.455763     | 0.598389     | 1.058027     | 1.090460 |
| 1612             | caffeine                           | 1.196775     | 1.125601     | 1.108164     | 1.014405     | 1.000686     | 1.007368 |
| 1059             | campesterol                        | 1.872022     | 1.052831     | 0.725153     | 1.483716     | 1.394295     | 1.055198 |
| 622              | caprate (10:0)                     | 1.007579     | 0.532248     | 0.757435     | 1.097380     | 0.830727     | 0.736372 |
| 618              | caproate (6:0)                     | 0.462978     | 0.836562     | 0.844482     | 0.588986     | 0.537642     | 0.495527 |
| 620              | caprylate (8:0)                    | 0.760430     | 0.765345     | 0.888824     | 1.284749     | 0.905589     | 0.791654 |
| 820              | carnitine                          | 1.334424     | 1.089571     | 1.004525     | 1.132457     | 1.009443     | 1.127019 |
| 1300             | catechol sulfate                   | 1.037193     | 0.960727     | 0.968757     | 0.912922     | 0.931018     | 0.871487 |
| 164              | C-glycosyltryptophan*              | 1.073840     | 1.083510     | 1.135640     | 1.101687     | 1.063441     | 1.089226 |
| 1020             | cholesterol                        | 1.155205     | 0.970677     | 0.898323     | 1.093240     | 0.794897     | 0.919676 |
| 881              | choline                            | 1.642235     | 1.430865     | 1.401498     | 1.467480     | 1.407785     | 1.347892 |
| 582              | cis-aconitate                      | 1.152070     | 0.682573     | 0.846721     | 0.908149     | 0.917629     | 0.814284 |
| 641              | cis-vaccenate (18:1n7)             | 2.198575     | 1.211049     | 1.057250     | 0.986304     | 0.990184     | 1.301888 |
| 579              | citrate                            | 0.481910     | 1.038135     | 0.818767     | 0.805495     | 0.588418     | 0.503089 |
| 248              | citruiline                         | 0.999848     | 0.734952     | 0.696646     | 0.838719     | 0.752438     | 0.817569 |
| 259              | creatine                           | 1.221663     | 1.046839     | 1.065430     | 1.044015     | 1.031773     | 1.020537 |
| 260              | creatinine                         | 1.293007     | 1.043565     | 0.737654     | 0.820706     | 0.999497     | 0.998604 |
| 213              | cysteine                           | 1.407057     | 0.543762     | 0.749065     | 1.340087     | 1.105029     | 1.471856 |
| 819              | deoxycarnitine                     | 1.208492     | 1.025422     | 1.039724     | 1.022425     | 0.978811     | 0.943533 |
| 655              | dihomo-linoleate (20:2n6)          | 1.946395     | 0.837818     | 1.410214     | 1.217187     | 1.747208     | 1.218597 |
| 609              | dihomo-linolenate (20:3n3 or n6)   | 1.732804     | 0.894730     | 0.966922     | 1.041964     | 1.290825     | 0.828665 |
| 531              | dihydroxyacetone phosphate (DHAP)  | 0.239333     | 0.507248     | 0.511241     | 0.239333     | 0.239333     | 0.337648 |
| 3                | dimethylglycine                    | 1.406961     | 1.287437     | 1.597749     | 1.231047     | 1.062675     | 1.477251 |
| 613              | docosaheptaenoate (DHA; 22:6n3)    | 1.558157     | 0.699621     | 0.968683     | 0.936022     | 1.329143     | 0.871083 |
| 611              | docosapentaenoate (n3 DPA; 22:5n3) | 1.829772     | 0.598146     | 1.089808     | 1.069857     | 1.579700     | 1.256369 |
| 610              | eicosapentaenoate (EPA; 20:5n3)    | 1.318244     | 0.846667     | 0.794184     | 0.856813     | 1.031976     | 1.013470 |

| DARM-00025      | DARM-00026   | DARM-00027     | DARM-00028   | DARM-00029   | DARM-00030   |
|-----------------|--------------|----------------|--------------|--------------|--------------|
| NHSCI 1866 T1 I | NHSCI 1866 C | NHSCI 1866 C I | NHSCI 1866 C | NHSCI 1866 C | NHSCI 1866 C |
| 997732          | 997735       | 997723         | 997728       | 997722       | 997744       |
| 991370          | 991371       | 991372         | 991373       | 991374       | 991375       |
| NHSCI 1866 T1   | NHSCI 1866 C | NHSCI 1866 C   | NHSCI 1866   | NHSCI 1866 C | NHSCI 1866 C |
| D28             | D0           | D7             | C D14        | D21          | D28          |
| 1866            | 1866         | 1866           | 1866         | 1866         | 1866         |
| T1 D28          | C D0         | C D7           | C D14        | C D21        | C D28        |
| 155.949         | 177.522      | 181.946        | 180.175      | 185.286      | 186.197      |

**PATHWAY**

**SORTORDER BIOCHEMICAL NAME**

|                                    | T1 D28    | C D0     | C D7     | C D14    | C D21    | C D28    |
|------------------------------------|-----------|----------|----------|----------|----------|----------|
| 1565 ergothioneine                 | 1.386868  | 1.331635 | 1.263646 | 1.209918 | 1.218306 | 1.096833 |
| 735 erucamide                      | 0.412254  | 2.048367 | 0.864038 | 1.366639 | 0.412254 | 1.679250 |
| 1632 erythritol                    | 2.824399  | 0.565976 | 0.617972 | 0.946709 | 0.833464 | 1.015656 |
| 453 erythronate*                   | 3.332240  | 0.811976 | 0.813199 | 0.965586 | 0.962365 | 1.306343 |
| 876 ethanolamine                   | 1.369070  | 0.730151 | 0.515675 | 0.723090 | 0.566198 | 1.485089 |
| 472 fructose                       | 1.499154  | 0.831481 | 0.887200 | 1.069168 | 0.904015 | 1.068746 |
| 524 fructose-6-phosphate           | 0.910504  | 1.110631 | 1.081938 | 1.276781 | 0.973879 | 0.908795 |
| 594 fumarate                       | 1.659439  | 1.003627 | 1.230403 | 1.366010 | 1.243402 | 1.153230 |
| 404 gamma-glutamylleucine          | 0.671972  | 0.972415 | 0.861748 | 0.671972 | 0.941181 | 0.723008 |
| 521 glucose                        | 1.073864  | 1.062467 | 0.963776 | 1.020154 | 0.865520 | 0.903436 |
| 519 glucose-6-phosphate (G6P)      | 1.078075  | 1.016150 | 1.054900 | 1.179862 | 1.009265 | 1.039973 |
| 39 glutamate                       | 1.172528  | 1.135226 | 1.018940 | 1.149158 | 0.864379 | 0.955808 |
| 44 glutamine                       | 0.708525  | 1.373010 | 1.189218 | 0.964980 | 0.821338 | 0.798523 |
| 80 glutaroyl carnitine             | 0.814561  | 1.073446 | 0.899838 | 1.049391 | 1.000000 | 1.261064 |
| 283 glutathione, oxidized (GSSG)   | 0.694916  | 1.302133 | 1.094876 | 0.887813 | 0.783689 | 1.011041 |
| 280 glutathione, reduced (GSH)     | 0.980108  | 1.150578 | 0.778673 | 1.077067 | 0.898670 | 0.864791 |
| 517 glycerate                      | 11.667626 | 0.405735 | 0.793935 | 0.996228 | 1.143282 | 1.410938 |
| 882 glycerol 3-phosphate (G3P)     | 0.976814  | 1.240466 | 1.087626 | 1.075427 | 0.859943 | 0.605443 |
| 883 glycerophosphorylcholine (GPC) | 1.235262  | 1.118117 | 0.941748 | 1.079808 | 0.982553 | 0.995264 |
| 1 glycine                          | 1.437647  | 0.644370 | 0.776633 | 1.143726 | 1.050041 | 1.170692 |
| 851 glycochenodeoxycholate         | 2.172812  | 2.433296 | 2.047159 | 1.991974 | 1.813181 | 1.524434 |
| 840 glycocholate                   | 1.326063  | 1.208381 | 1.218318 | 1.000000 | 1.043352 | 0.878028 |
| 849 glycodeoxycholate              | 1.388473  | 0.949834 | 0.751288 | 1.203790 | 0.968444 | 1.177614 |
| 1318 glycolate (hydroxyacetate)    | 1.119927  | 0.946077 | 0.890375 | 1.098857 | 0.819823 | 0.994096 |
| 1128 guanosine                     | 0.673816  | 0.755494 | 0.774575 | 0.822097 | 0.746231 | 0.716737 |
| 1212 heme*                         | 0.653546  | 0.095646 | 0.317162 | 0.958180 | 0.978704 | 4.653585 |
| 619 heptanoate (7:0)               | 0.595348  | 0.623683 | 0.693780 | 0.587462 | 0.609394 | 0.662417 |
| 823 hexanoylcarnitine              | 0.809135  | 1.645624 | 1.131565 | 0.690039 | 0.810615 | 0.840919 |
| 1288 hippurate                     | 1.050381  | 0.898740 | 1.057115 | 0.934900 | 0.852371 | 0.889626 |
| 50 histidine                       | 1.195045  | 0.866347 | 1.015573 | 1.047351 | 0.930853 | 0.873263 |

| PATHWAY<br>SORTORDER | BIOCHEMICAL NAME                                                                      | DARM-00025                        | DARM-00026                       | DARM-00027                       | DARM-00028                        | DARM-00029                       | DARM-00030                       |
|----------------------|---------------------------------------------------------------------------------------|-----------------------------------|----------------------------------|----------------------------------|-----------------------------------|----------------------------------|----------------------------------|
|                      |                                                                                       | NHSCI 1866 T1<br>997732<br>991370 | NHSCI 1866 C<br>997735<br>991371 | NHSCI 1866 C<br>997723<br>991372 | NHSCI 1866 C<br>997728<br>991373  | NHSCI 1866 C<br>997722<br>991374 | NHSCI 1866 C<br>997744<br>991375 |
|                      |                                                                                       | D28<br>1866<br>T1 D28<br>155.949  | D0<br>1866<br>C D0<br>177.522    | D7<br>1866<br>C D7<br>181.946    | C D14<br>1866<br>C D14<br>180.175 | D21<br>1866<br>C D21<br>185.286  | D28<br>1866<br>C D28<br>186.197  |
|                      |                                                                                       | T1 D28                            | C D0                             | C D7                             | C D14                             | C D21                            | C D28                            |
|                      | 231 homocysteine                                                                      | 2.202654                          | 0.399736                         | 0.490051                         | 1.324761                          | 1.078158                         | 1.169184                         |
|                      | 1585 homostachydrine*                                                                 | 1.025057                          | 1.027667                         | 0.676588                         | 0.897241                          | 0.659175                         | 0.772919                         |
|                      | 206 hydroxyisovaleroyl carnitine                                                      | 1.394634                          | 1.289270                         | 1.381048                         | 1.288663                          | 1.243729                         | 1.205365                         |
|                      | 1098 hypoxanthine                                                                     | 6.127630                          | 0.101341                         | 0.083798                         | 0.280312                          | 0.883558                         | 2.099629                         |
|                      | 1101 inosine 5'-monophosphate (IMP)<br>Isobar: fructose 1,6-diphosphate, glucose 1,6- | 2.658472                          | 0.463627                         | 1.102380                         | 1.971251                          | 1.092462                         | 1.112853                         |
|                      | 527 diphosphate, myo-inositol 1,4 or 1,3-diphosphate                                  | 0.494691                          | 0.902267                         | 0.909041                         | 0.844247                          | 0.861112                         | 0.577429                         |
|                      | 561 Isobar: ribulose 5-phosphate, xylulose 5-phosphate                                | 0.535723                          | 0.876557                         | 0.812388                         | 0.909738                          | 0.577133                         | 0.670054                         |
|                      | 496 Isobar: sorbitol, mannitol                                                        | 0.996924                          | 0.951858                         | 0.969587                         | 0.931073                          | 0.942483                         | 0.960446                         |
|                      | 200 isobutyrylcarnitine                                                               | 1.057582                          | 1.016714                         | 1.130305                         | 0.959998                          | 0.942708                         | 0.884175                         |
|                      | 180 isoleucine                                                                        | 1.428627                          | 0.967821                         | 1.004091                         | 0.958783                          | 0.925595                         | 0.977112                         |
|                      | 478 isomaltose                                                                        | 1.227936                          | 1.012143                         | 0.950239                         | 0.959263                          | 0.751023                         | 0.865603                         |
|                      | 205 isovalerylcarnitine                                                               | 1.106746                          | 1.088225                         | 0.999515                         | 1.112517                          | 1.100029                         | 0.861429                         |
|                      | 144 kynurenine                                                                        | 0.976332                          | 1.061583                         | 1.020485                         | 0.916273                          | 1.159457                         | 0.933957                         |
|                      | 536 lactate                                                                           | 2.094846                          | 0.218916                         | 0.559940                         | 0.989142                          | 1.014542                         | 1.206432                         |
|                      | 1018 lathosterol                                                                      | 0.489776                          | 0.489776                         | 0.489776                         | 0.627744                          | 0.489776                         | 0.489776                         |
|                      | 625 laurate (12:0)                                                                    | 0.995648                          | 0.862836                         | 0.993126                         | 1.121053                          | 1.092028                         | 0.922148                         |
|                      | 181 leucine                                                                           | 1.455482                          | 1.004502                         | 1.013630                         | 1.029515                          | 0.979941                         | 1.089607                         |
|                      | 604 linoleate (18:2n6)                                                                | 1.784699                          | 0.934485                         | 1.194274                         | 1.172507                          | 1.429780                         | 1.029350                         |
|                      | 608 linolenate [alpha or gamma; (18:3n3 or 6)]                                        | 1.402727                          | 1.007750                         | 0.937029                         | 1.139813                          | 1.144420                         | 0.943566                         |
|                      | 69 lysine                                                                             | 1.449671                          | 0.983697                         | 0.766798                         | 0.955336                          | 0.613590                         | 1.257529                         |
|                      | 598 malate                                                                            | 1.626989                          | 0.670175                         | 0.887241                         | 1.181244                          | 1.063635                         | 1.451410                         |
|                      | 482 maltose                                                                           | 1.215619                          | 1.109761                         | 0.921452                         | 1.109842                          | 0.878572                         | 0.819446                         |
|                      | 487 mannose                                                                           | 0.999108                          | 1.042200                         | 0.955978                         | 1.081089                          | 0.814603                         | 0.861041                         |
|                      | 489 mannose-6-phosphate                                                               | 1.203799                          | 0.908216                         | 0.804798                         | 1.025133                          | 0.927659                         | 1.043882                         |
|                      | 635 margarate (17:0)                                                                  | 1.352060                          | 0.672355                         | 1.072389                         | 0.969226                          | 1.266985                         | 0.905158                         |



|                  | DARM-00025                               | DARM-00026   | DARM-00027   | DARM-00028   | DARM-00029   | DARM-00030   |          |
|------------------|------------------------------------------|--------------|--------------|--------------|--------------|--------------|----------|
|                  | NHSCI 1866 T1                            | NHSCI 1866 C |          |
|                  | 997732                                   | 997735       | 997723       | 997728       | 997722       | 997744       |          |
|                  | 991370                                   | 991371       | 991372       | 991373       | 991374       | 991375       |          |
|                  | NHSCI 1866 T1                            | NHSCI 1866 C |          |
|                  | D28                                      | D0           | D7           | C D14        | D21          | D28          |          |
|                  | 1866                                     | 1866         | 1866         | 1866         | 1866         | 1866         |          |
|                  | T1 D28                                   | C D0         | C D7         | C D14        | C D21        | C D28        |          |
|                  | 155.949                                  | 177.522      | 181.946      | 180.175      | 185.286      | 186.197      |          |
| <b>PATHWAY</b>   | T1 D28                                   | C D0         | C D7         | C D14        | C D21        | C D28        |          |
| <b>SORTORDER</b> | <b>BIOCHEMICAL NAME</b>                  |              |              |              |              |              |          |
| 658              | mead acid (20:3n9)                       | 1.218585     | 1.172672     | 0.726815     | 1.091334     | 0.676024     | 0.425026 |
| 225              | methionine                               | 0.873652     | 1.491814     | 1.427271     | 1.016848     | 0.720229     | 0.655113 |
| 890              | myo-inositol                             | 1.215006     | 1.138390     | 0.941009     | 1.061353     | 0.841823     | 0.911860 |
| 629              | myristate (14:0)                         | 1.233155     | 0.551269     | 0.893466     | 1.002550     | 1.187990     | 0.929182 |
| 630              | myristoleate (14:1n5)                    | 0.493142     | 1.802446     | 0.705813     | 1.055310     | 1.180227     | 0.860889 |
| 1242.1           | N1-Methyl-2-pyridone-5-carboxamide       | 0.919549     | 0.565019     | 0.827482     | 0.847894     | 0.367389     | 0.703122 |
| 75               | N-6-trimethyllysine                      | 1.276546     | 1.181597     | 1.756851     | 1.180948     | 1.400720     | 1.112876 |
| 4                | N-acetylglycine                          | 1.119319     | 0.929361     | 0.756931     | 0.745083     | 1.107049     | 1.113820 |
| 227              | N-acetylmethionine                       | 1.198684     | 1.151241     | 0.934098     | 1.216606     | 0.989625     | 1.000000 |
| 455              | N-acetylneuraminic acid                  | 1.937645     | 0.364520     | 0.452407     | 1.131994     | 1.036507     | 0.923535 |
| 1221             | nicotinamide                             | 1.128037     | 1.019320     | 0.946052     | 0.988162     | 1.015114     | 0.922631 |
| 1224             | nicotinamide adenine dinucleotide (NAD+) | 0.868102     | 0.997339     | 0.981609     | 1.035125     | 0.951168     | 1.944172 |
| 825              | octanoylcarnitine                        | 1.051807     | 1.065294     | 0.932738     | 0.977123     | 1.008875     | 0.999185 |
| 639              | oleate (18:1n9)                          | 1.528451     | 0.805042     | 0.887890     | 1.026755     | 0.951155     | 1.059180 |
| 835              | oleoylcarnitine                          | 2.779433     | 0.056114     | 0.407851     | 1.164793     | 1.584396     | 9.073618 |
| 285              | ophthalmate                              | 0.252181     | 3.902869     | 0.946024     | 0.535167     | 0.252181     | 0.252181 |
| 244              | ornithine                                | 1.196890     | 0.932498     | 0.797281     | 0.871167     | 0.661629     | 1.006229 |
| 632              | palmitate (16:0)                         | 1.301430     | 0.766287     | 1.007077     | 1.000387     | 1.152141     | 0.949563 |
| 633              | palmitoleate (16:1n7)                    | 1.278836     | 0.956717     | 1.146023     | 0.841215     | 1.020416     | 0.718337 |
| 1004             | palmitoyl sphingomyelin                  | 1.133156     | 1.008461     | 0.935966     | 1.066178     | 0.751650     | 0.901174 |
| 833              | palmitoylcarnitine                       | 2.010902     | 0.059115     | 0.524652     | 0.915916     | 1.110798     | 8.697425 |
| 1243             | pantothenate                             | 1.069212     | 0.907531     | 0.920280     | 0.920629     | 1.398636     | 0.942652 |
| 1613             | paraxanthine                             | 1.085177     | 0.948751     | 0.837932     | 0.881288     | 0.864666     | 0.852477 |
| 88               | p-cresol sulfate                         | 0.789020     | 0.770020     | 0.769045     | 0.725472     | 0.715997     | 0.667300 |
| 621              | pelargonate (9:0)                        | 0.837061     | 0.360075     | 0.700338     | 0.768938     | 0.741228     | 0.599953 |
| 631              | pentadecanoate (15:0)                    | 1.419314     | 0.712829     | 1.024571     | 1.086036     | 1.357093     | 1.003934 |
| 135              | phenol sulfate                           | 1.080150     | 1.039700     | 0.860615     | 1.076993     | 0.978846     | 0.785161 |
| 128              | phenylacetylglutamine                    | 0.680346     | 0.604740     | 0.665487     | 0.688121     | 0.667230     | 0.693889 |
| 83               | phenylalanine                            | 1.132419     | 0.804835     | 0.876091     | 0.877652     | 0.881666     | 0.938853 |
| 602              | phosphate                                | 1.110857     | 0.946588     | 0.949372     | 1.190405     | 0.944489     | 1.020523 |
| 534              | phosphoenolpyruvate (PEP)                | 0.279542     | 2.330041     | 1.000000     | 0.575670     | 0.181336     | 0.155305 |
| 877              | phosphoethanolamine                      | 0.712319     | 0.593700     | 0.593700     | 0.593700     | 0.593700     | 0.593700 |

| PATHWAY   | DARM-00025 DARM-00026 DARM-00027 DARM-00028 DARM-00029 DARM-00030                  |               |              |              |            |              |              |
|-----------|------------------------------------------------------------------------------------|---------------|--------------|--------------|------------|--------------|--------------|
|           | NHSCI 1866 T1 I NHSCI 1866 C NHSCI 1866 C I NHSCI 1866 C NHSCI 1866 C NHSCI 1866 C |               |              |              |            |              |              |
| SORTORDER | BIOCHEMICAL NAME                                                                   | 997732        | 997735       | 997723       | 997728     | 997722       | 997744       |
|           |                                                                                    | 991370        | 991371       | 991372       | 991373     | 991374       | 991375       |
|           |                                                                                    | NHSCI 1866 T1 | NHSCI 1866 C | NHSCI 1866 C | NHSCI 1866 | NHSCI 1866 C | NHSCI 1866 C |
|           |                                                                                    | D28           | D0           | D7           | C D14      | D21          | D28          |
|           |                                                                                    | 1866          | 1866         | 1866         | 1866       | 1866         | 1866         |
|           |                                                                                    | T1 D28        | C D0         | C D7         | C D14      | C D21        | C D28        |
|           |                                                                                    | 155.949       | 177.522      | 181.946      | 180.175    | 185.286      | 186.197      |
|           |                                                                                    | T1 D28        | C D0         | C D7         | C D14      | C D21        | C D28        |
| 74        | pipecolate                                                                         | 1.009720      | 0.898390     | 0.815539     | 0.821096   | 0.873731     | 0.997796     |
| 1531      | piperine                                                                           | 0.958771      | 1.319098     | 1.470407     | 1.615822   | 0.782269     | 0.825044     |
| 246       | proline                                                                            | 1.195957      | 0.942258     | 1.033618     | 0.983038   | 1.045444     | 0.978514     |
| 809       | propionylcarnitine                                                                 | 1.063614      | 1.457202     | 1.446774     | 1.233793   | 1.105600     | 1.125514     |
| 1181      | pseudouridine                                                                      | 1.128058      | 1.095967     | 0.810404     | 0.638275   | 0.790413     | 0.999677     |
| 45        | pyroglutamine*                                                                     | 1.601902      | 1.262071     | 1.827425     | 1.304051   | 1.359677     | 1.632543     |
| 603       | pyrophosphate (PPi)                                                                | 0.761614      | 1.243354     | 1.085167     | 0.990363   | 0.285513     | 0.794945     |
| 535       | pyruvate                                                                           | 4.683874      | 2.276982     | 1.490731     | 0.710654   | 0.596456     | 0.493004     |
| 1469      | ranitidine                                                                         | 0.811072      | 0.811072     | 0.811072     | 0.811072   | 0.811072     | 0.811072     |
| 548       | ribitol                                                                            | 8.146637      | 0.742077     | 0.821356     | 0.652676   | 0.652824     | 1.041283     |
| 557       | ribose 5-phosphate                                                                 | 0.609062      | 0.758696     | 0.754124     | 1.146996   | 1.109373     | 0.461602     |
| 559       | ribulose                                                                           | 2.586649      | 0.240496     | 0.824892     | 1.085540   | 0.912667     | 1.285401     |
| 224       | S-adenosylhomocysteine (SAH)                                                       | 1.306917      | 0.665980     | 1.038199     | 1.065144   | 1.192103     | 1.081832     |
| 551       | sedoheptulose-7-phosphate                                                          | 1.663972      | 0.882284     | 0.561685     | 0.753922   | 1.195141     | 2.407375     |
| 8         | serine                                                                             | 1.464692      | 0.968525     | 0.965250     | 1.198912   | 0.926531     | 1.074484     |
| 216       | S-methylcysteine                                                                   | 0.731956      | 0.453662     | 0.457515     | 0.823196   | 0.438733     | 0.633290     |
| 281       | S-methylglutathione                                                                | 0.811779      | 0.856518     | 1.097021     | 0.837567   | 1.002890     | 1.572077     |
| 270       | spermidine                                                                         | 1.260416      | 1.050133     | 1.067759     | 1.135426   | 1.152412     | 1.121663     |
| 1584      | stachydrine                                                                        | 2.395504      | 2.159253     | 2.096279     | 2.038510   | 1.981464     | 2.006947     |
| 637       | stearate (18:0)                                                                    | 1.289608      | 0.685765     | 0.988116     | 0.976713   | 1.131377     | 0.956837     |
| 1005      | stearoyl sphingomyelin                                                             | 1.077618      | 0.861948     | 0.762315     | 0.861358   | 0.889997     | 0.750174     |
| 834       | stearoylcarnitine                                                                  | 1.762390      | 0.056108     | 0.283844     | 0.924164   | 1.141065     | 6.515597     |
| 591       | succinylcarnitine                                                                  | 1.623486      | 1.094559     | 1.165168     | 1.233136   | 1.269955     | 1.269939     |
| 1662      | terephthalic acid                                                                  | 1.158495      | 1.296798     | 1.150642     | 1.012059   | 1.056469     | 1.091768     |
| 1614      | theobromine                                                                        | 1.074257      | 0.671401     | 0.864160     | 0.825930   | 0.888004     | 0.649509     |
| 1615      | theophylline                                                                       | 1.151086      | 1.300377     | 1.238272     | 0.774866   | 1.379035     | 0.624518     |
| 549       | threitol                                                                           | 1.245565      | 0.590636     | 0.676204     | 0.890473   | 0.657034     | 0.823696     |
| 1199      | threonate                                                                          | 1.293257      | 0.923661     | 0.782371     | 0.869069   | 0.804530     | 0.717342     |
| 17        | threonine                                                                          | 1.551739      | 0.972354     | 0.912796     | 1.029784   | 1.131052     | 1.200651     |
| 252       | trans-4-hydroxyproline                                                             | 0.773043      | 0.683168     | 0.753799     | 0.801991   | 0.796526     | 0.663000     |

|  | DARM-00025      | DARM-00026   | DARM-00027     | DARM-00028   | DARM-00029   | DARM-00030   |
|--|-----------------|--------------|----------------|--------------|--------------|--------------|
|  | NHSCI 1866 T1 I | NHSCI 1866 C | NHSCI 1866 C I | NHSCI 1866 C | NHSCI 1866 C | NHSCI 1866 C |
|  | 997732          | 997735       | 997723         | 997728       | 997722       | 997744       |
|  | 991370          | 991371       | 991372         | 991373       | 991374       | 991375       |
|  | NHSCI 1866 T1   | NHSCI 1866 C | NHSCI 1866 C   | NHSCI 1866   | NHSCI 1866 C | NHSCI 1866 C |
|  | D28             | D0           | D7             | C D14        | D21          | D28          |
|  | 1866            | 1866         | 1866           | 1866         | 1866         | 1866         |
|  | T1 D28          | C D0         | C D7           | C D14        | C D21        | C D28        |
|  | 155.949         | 177.522      | 181.946        | 180.175      | 185.286      | 186.197      |
|  | T1 D28          | C D0         | C D7           | C D14        | C D21        | C D28        |

**PATHWAY**

**SORTORDER BIOCHEMICAL NAME**

|                                         |          |          |          |          |          |          |
|-----------------------------------------|----------|----------|----------|----------|----------|----------|
| 501 trehalose                           | 1.534496 | 0.202847 | 0.589175 | 1.247912 | 0.961607 | 1.668020 |
| 1242 trigonelline (N'-methylnicotinate) | 1.405095 | 1.311146 | 1.197020 | 1.208728 | 1.239240 | 1.197533 |
| 145 tryptophan                          | 1.112154 | 0.904279 | 0.839975 | 0.924663 | 0.888689 | 0.905762 |
| 151 tryptophan betaine                  | 1.763188 | 1.536409 | 1.481729 | 1.504200 | 1.433442 | 1.418162 |
| 99 tyrosine                             | 1.238953 | 1.068877 | 1.011654 | 1.067225 | 1.012833 | 1.136778 |
| 1149 urate                              | 0.925810 | 1.211955 | 1.081120 | 0.996417 | 0.958618 | 0.770822 |
| 245 urea                                | 1.080118 | 0.904948 | 0.786405 | 0.905784 | 0.770561 | 0.826782 |
| 1180 uridine                            | 1.462895 | 0.770914 | 0.875236 | 1.017241 | 1.177429 | 1.186555 |
| 190 valine                              | 1.224885 | 0.998034 | 0.979434 | 1.049638 | 1.002854 | 1.053645 |
| 565 xylitol                             | 1.069224 | 0.127693 | 0.127693 | 0.136454 | 0.127693 | 0.127693 |
| 570 xylonate                            | 1.012615 | 0.764882 | 0.768001 | 1.025344 | 0.723918 | 0.911486 |
| 569 xylose                              | 4.831216 | 1.249813 | 1.338657 | 1.007424 | 0.405368 | 0.755134 |

Shaded cells indicate  $p \leq 0.05$  (red=higher green=lower blue-bold  $0.05 < p < 0.10$ )

T1: anaerobic T2: +CO2

| PATHWAY SORT | SUPER PATHWAY                             | SUB PATHWAY                              | BIOCHEMICAL NAME       | Kegg                      | HMDB                      | T1-0 C-0 |
|--------------|-------------------------------------------|------------------------------------------|------------------------|---------------------------|---------------------------|----------|
| 1            | Amino acid                                | Glycine, serine and threonine metabolism | glycine                | <a href="#">C00037</a>    | <a href="#">HMDB00123</a> | 0.96     |
| 3            |                                           |                                          | dimethylglycine        | <a href="#">C01026</a>    | <a href="#">HMDB00092</a> | 0.75     |
| 4            |                                           |                                          | N-acetylglycine        |                           | <a href="#">HMDB00532</a> | 0.76     |
| 7            |                                           |                                          | beta-hydroxypyruvate   | <a href="#">C00168</a>    | <a href="#">HMDB01352</a> | 0.86     |
| 8            |                                           |                                          | serine                 | <a href="#">C00065</a>    | <a href="#">HMDB03406</a> | 0.96     |
| 17           |                                           |                                          | threonine              | <a href="#">C00188</a>    | <a href="#">HMDB00167</a> | 1.01     |
| 22           |                                           |                                          | betaine                |                           | <a href="#">HMDB00043</a> | 1.01     |
| 24           |                                           |                                          | aspartate              | <a href="#">C00049</a>    | <a href="#">HMDB00191</a> | 1.09     |
| 25           |                                           |                                          | asparagine             | <a href="#">C00152</a>    | <a href="#">HMDB00168</a> | 1.03     |
| 26           |                                           | beta-alanine                             | <a href="#">C00099</a> | <a href="#">HMDB00056</a> | 0.77                      |          |
| 27           |                                           | alanine                                  | <a href="#">C00041</a> | <a href="#">HMDB00161</a> | 0.85                      |          |
| 39           |                                           | Glutamate metabolism                     | glutamate              | <a href="#">C00025</a>    | <a href="#">HMDB03339</a> | 1.06     |
| 44           |                                           |                                          | glutamine              | <a href="#">C00064</a>    | <a href="#">HMDB00641</a> | 1.01     |
| 45           |                                           |                                          | pyroglutamine*         |                           |                           | 1.02     |
| 50           |                                           | Histidine metabolism                     | histidine              | <a href="#">C00135</a>    | <a href="#">HMDB00177</a> | 1.31     |
| 69           |                                           | Lysine metabolism                        | lysine                 | <a href="#">C00047</a>    | <a href="#">HMDB00182</a> | 1.01     |
| 74           |                                           |                                          | pipecolate             | <a href="#">C00408</a>    | <a href="#">HMDB00070</a> | 0.90     |
| 75           |                                           |                                          | N-6-trimethyllysine    | <a href="#">C03793</a>    | <a href="#">HMDB01325</a> | 1.07     |
| 80           |                                           |                                          | glutaroyl carnitine    |                           | <a href="#">HMDB13130</a> | 0.90     |
| 83           |                                           | Phenylalanine & tyrosine metabolism      | phenylalanine          | <a href="#">C00079</a>    | <a href="#">HMDB00159</a> | 1.06     |
| 88           |                                           |                                          | p-cresol sulfate       | <a href="#">C01468</a>    |                           | 0.93     |
| 99           |                                           |                                          | tyrosine               | <a href="#">C00082</a>    | <a href="#">HMDB00158</a> | 1.04     |
| 128          |                                           |                                          | phenylacetylglutamine  | <a href="#">C05597</a>    | <a href="#">HMDB06344</a> | 1.08     |
| 135          |                                           |                                          | phenol sulfate         | <a href="#">C02180</a>    |                           | 1.02     |
| 144          |                                           | Tryptophan metabolism                    | kynurenine             | <a href="#">C00328</a>    | <a href="#">HMDB00684</a> | 1.15     |
| 145          |                                           |                                          | tryptophan             | <a href="#">C00078</a>    | <a href="#">HMDB00929</a> | 0.99     |
| 151          |                                           |                                          | tryptophan betaine     | <a href="#">C09213</a>    |                           | 0.91     |
| 164          |                                           |                                          | C-glycosyltryptophan*  |                           |                           | 0.96     |
| 170          |                                           |                                          | 3-indoxyl sulfate      |                           | <a href="#">HMDB00682</a> | 0.93     |
| 172          |                                           |                                          | 3-methyl-2-oxobutyrate | <a href="#">C00141</a>    | <a href="#">HMDB00019</a> | 0.42     |
| 173          |                                           | 3-methyl-2-oxovalerate                   | <a href="#">C00671</a> | <a href="#">HMDB03736</a> | 0.82                      |          |
| 179          |                                           | alpha-hydroxyisocaproate                 | <a href="#">C03264</a> | <a href="#">HMDB00746</a> | 1.00                      |          |
| 180          |                                           | isoleucine                               | <a href="#">C00407</a> | <a href="#">HMDB00172</a> | 1.06                      |          |
| 181          |                                           | leucine                                  | <a href="#">C00123</a> | <a href="#">HMDB00687</a> | 0.98                      |          |
| 190          | Valine, leucine and isoleucine metabolism | valine                                   | <a href="#">C00183</a> | <a href="#">HMDB00883</a> | 1.04                      |          |
| 193          |                                           | 4-methyl-2-oxopentanoate                 | <a href="#">C00233</a> | <a href="#">HMDB00695</a> | 0.79                      |          |
| 198          |                                           | alpha-hydroxyisovalerate                 |                        | <a href="#">HMDB00407</a> | 1.44                      |          |
| 200          |                                           | isobutyrylcarnitine                      |                        |                           | 1.06                      |          |
| 202          |                                           | 2-methylbutyrylcarnitine                 |                        | <a href="#">HMDB00378</a> | 0.88                      |          |
| 205          |                                           | isovalerylcarnitine                      |                        | <a href="#">HMDB00688</a> | 0.93                      |          |
| 206          |                                           | hydroxyisovaleroyl carnitine             |                        |                           | 0.97                      |          |

Shaded cells indicate  $p \leq 0.05$  (red=higher green=lower blue-bold  $0.05 < p < 0.10$ )

T1: anaerobic T2: +CO2

| PATHWAY SORT | SUPER PATHWAY              | SUB PATHWAY                                   | BIOCHEMICAL NAME                                             | Kegg                                                      | HMDB                      | T1-0 C-0                  |                           |
|--------------|----------------------------|-----------------------------------------------|--------------------------------------------------------------|-----------------------------------------------------------|---------------------------|---------------------------|---------------------------|
| 213          |                            | Cysteine, methionine, SAM, taurine metabolism | cysteine                                                     | <a href="#">C00097</a>                                    | <a href="#">HMDB00574</a> | 0.79                      |                           |
| 216          |                            |                                               | S-methylcysteine                                             |                                                           | <a href="#">HMDB02108</a> | 0.83                      |                           |
| 224          |                            |                                               | S-adenosylhomocysteine (SAH)                                 | <a href="#">C00021</a>                                    | <a href="#">HMDB00939</a> | 0.99                      |                           |
| 225          |                            |                                               | methionine                                                   | <a href="#">C00073</a>                                    | <a href="#">HMDB00696</a> | 1.09                      |                           |
| 227          |                            |                                               | N-acetylmethionine                                           | <a href="#">C02712</a>                                    | <a href="#">HMDB11745</a> | 0.86                      |                           |
| 229          |                            |                                               | 2-hydroxybutyrate (AHB)                                      | <a href="#">C05984</a>                                    | <a href="#">HMDB00008</a> | 1.05                      |                           |
| 231          |                            |                                               | homocysteine                                                 | <a href="#">C00155</a>                                    | <a href="#">HMDB00742</a> | 0.73                      |                           |
| 241          |                            |                                               | Urea cycle; arginine-, proline-, metabolism                  | arginine                                                  | <a href="#">C00062</a>    | <a href="#">HMDB00517</a> | 1.28                      |
| 244          |                            |                                               |                                                              | ornithine                                                 | <a href="#">C00077</a>    | <a href="#">HMDB03374</a> | 0.88                      |
| 245          |                            |                                               |                                                              | urea                                                      | <a href="#">C00086</a>    | <a href="#">HMDB00294</a> | 0.92                      |
| 246          |                            | proline                                       |                                                              | <a href="#">C00148</a>                                    | <a href="#">HMDB00162</a> | 0.94                      |                           |
| 248          |                            | citrulline                                    |                                                              | <a href="#">C00327</a>                                    | <a href="#">HMDB00904</a> | 1.14                      |                           |
| 252          |                            | trans-4-hydroxyproline                        | <a href="#">C01157</a>                                       | <a href="#">HMDB00725</a>                                 | 0.98                      |                           |                           |
| 259          |                            | Creatine metabolism                           | creatine                                                     | <a href="#">C00300</a>                                    | <a href="#">HMDB00064</a> | 0.98                      |                           |
| 260          |                            |                                               | creatinine                                                   | <a href="#">C00791</a>                                    | <a href="#">HMDB00562</a> | 0.98                      |                           |
| 263          |                            | Butanoate metabolism                          | 2-aminobutyrate                                              | <a href="#">C02261</a>                                    | <a href="#">HMDB00650</a> | 0.88                      |                           |
| 266          |                            | Polyamine metabolism                          | 5-methylthioadenosine (MTA)                                  | <a href="#">C00170</a>                                    | <a href="#">HMDB01173</a> | 1.06                      |                           |
| 270          |                            |                                               | spermidine                                                   | <a href="#">C00315</a>                                    | <a href="#">HMDB01257</a> | 0.96                      |                           |
| 280          |                            | Glutathione metabolism                        | glutathione, reduced (GSH)                                   | <a href="#">C00051</a>                                    | <a href="#">HMDB00125</a> | 1.05                      |                           |
| 281          |                            |                                               | S-methylglutathione                                          | <a href="#">C11347</a>                                    |                           | 1.13                      |                           |
| 282          |                            |                                               | 5-oxoproline                                                 | <a href="#">C01879</a>                                    | <a href="#">HMDB00267</a> | 1.05                      |                           |
| 283          |                            |                                               | glutathione, oxidized (GSSG)                                 | <a href="#">C00127</a>                                    | <a href="#">HMDB03337</a> | 1.08                      |                           |
| 285          |                            |                                               | ophthalmate                                                  |                                                           | <a href="#">HMDB05765</a> | 1.20                      |                           |
| 404          |                            |                                               | Peptide                                                      | gamma-glutamyl                                            | gamma-glutamylleucine     |                           | <a href="#">HMDB11171</a> |
| 453          |                            |                                               | Aminosugars metabolism                                       | erythronate*                                              |                           | <a href="#">HMDB00613</a> | <b>0.81</b>               |
| 455          |                            |                                               |                                                              | N-acetylneuramate                                         | <a href="#">C00270</a>    | <a href="#">HMDB00230</a> | 1.20                      |
| 472          |                            |                                               | Fructose, mannose, galactose, starch, and sucrose metabolism | fructose                                                  | <a href="#">C00095</a>    | <a href="#">HMDB00660</a> | 0.84                      |
| 478          |                            |                                               |                                                              | isomaltose                                                | <a href="#">C00252</a>    | <a href="#">HMDB02923</a> | 1.41                      |
| 482          | maltose                    |                                               |                                                              | <a href="#">C00208</a>                                    | <a href="#">HMDB00163</a> | <b>0.77</b>               |                           |
| 487          | mannose                    |                                               |                                                              | <a href="#">C00159</a>                                    | <a href="#">HMDB00169</a> | 0.92                      |                           |
| 489          | mannose-6-phosphate        |                                               |                                                              | <a href="#">C00275</a>                                    | <a href="#">HMDB01078</a> | <b>0.50</b>               |                           |
| 496          | Isobar: sorbitol, mannitol |                                               |                                                              | <a href="#">C00392,C01722,C01697,C01489,C00794,C01507</a> | <a href="#">HMDB00247</a> | <b>1.14</b>               |                           |
| 501          | trehalose                  |                                               |                                                              | <a href="#">C01083</a>                                    | <a href="#">HMDB00975</a> | 1.09                      |                           |

Shaded cells indicate  $p \leq 0.05$  (red=higher green=lower blue-bold  $0.05 < p < 0.10$ )

T1: anaerobic T2: +CO2

| PATHWAY SORT | SUPER PATHWAY | SUB PATHWAY                                        | BIOCHEMICAL NAME                                                                               | Kegg                      | HMDB                                 | T1-0 C-0                  |      |
|--------------|---------------|----------------------------------------------------|------------------------------------------------------------------------------------------------|---------------------------|--------------------------------------|---------------------------|------|
| 515          | Carbohydrate  | Glycolysis, gluconeogenesis, pyruvate metabolism   | 1,5-anhydroglucitol (1,5-AG)                                                                   | <a href="#">C07326</a>    | <a href="#">HMDB02712</a>            | 0.96                      |      |
| 517          |               |                                                    | glycerate                                                                                      | <a href="#">C00258</a>    | <a href="#">HMDB00139</a>            | 1.21                      |      |
| 519          |               |                                                    | glucose-6-phosphate (G6P)                                                                      | <a href="#">C00668</a>    | <a href="#">HMDB01401</a>            | 0.17                      |      |
| 521          |               |                                                    | glucose                                                                                        | <a href="#">C00293</a>    | <a href="#">HMDB00122</a>            | 0.93                      |      |
| 523          |               |                                                    | 1,6-anhydroglucose                                                                             |                           | <a href="#">HMDB00640</a>            | 0.66                      |      |
| 524          |               |                                                    | fructose-6-phosphate                                                                           | <a href="#">C05345</a>    | <a href="#">HMDB00124</a>            | 0.43                      |      |
| 527          |               |                                                    | Isobar: fructose 1,6-diphosphate, glucose 1,6-diphosphate, myo-inositol 1,4 or 1,3-diphosphate |                           |                                      | 4.26                      |      |
| 529          |               |                                                    | 3-phosphoglycerate                                                                             | <a href="#">C00597</a>    | <a href="#">HMDB00807</a>            | 1.98                      |      |
| 531          |               |                                                    | dihydroxyacetone phosphate (DHAP)                                                              | <a href="#">C00111</a>    | <a href="#">HMDB01473</a>            | 29.69                     |      |
| 532          |               |                                                    | 1,3-dihydroxyacetone                                                                           | <a href="#">C00184</a>    | <a href="#">HMDB01882</a>            | 1.06                      |      |
| 533          |               |                                                    | 2,3-diphosphoglycerate                                                                         | <a href="#">C01159</a>    | <a href="#">HMDB01294</a>            | 1.50                      |      |
| 534          |               |                                                    | phosphoenolpyruvate (PEP)                                                                      | <a href="#">C00074</a>    | <a href="#">HMDB00263</a>            | 1.54                      |      |
| 535          |               |                                                    | pyruvate                                                                                       | <a href="#">C00022</a>    | <a href="#">HMDB00243</a>            | 0.03                      |      |
| 536          |               |                                                    | lactate                                                                                        | <a href="#">C00186</a>    | <a href="#">HMDB00190</a>            | 1.44                      |      |
| 545          |               |                                                    | Nucleotide sugars, pentose metabolism                                                          | 6-phosphogluconate        | <a href="#">C00345</a>               | <a href="#">HMDB01316</a> | 0.33 |
| 546          |               |                                                    |                                                                                                | arabitol                  | <a href="#">C00474</a>               | <a href="#">HMDB01851</a> | 0.86 |
| 548          |               |                                                    |                                                                                                | ribitol                   | <a href="#">C00474</a>               | <a href="#">HMDB00508</a> | 0.93 |
| 549          |               |                                                    |                                                                                                | threitol                  | <a href="#">C16884</a>               | <a href="#">HMDB04136</a> | 1.08 |
| 551          |               | sedoheptulose-7-phosphate                          |                                                                                                | <a href="#">C05382</a>    | <a href="#">HMDB01068</a>            | 0.13                      |      |
| 557          |               | ribose 5-phosphate                                 |                                                                                                | <a href="#">C00117</a>    | <a href="#">HMDB00618</a>            | 1.91                      |      |
| 559          |               | ribulose                                           |                                                                                                | <a href="#">C00309</a>    | <a href="#">HMDB00021, HMDB02374</a> | 4.96                      |      |
| 561          |               | Isobar: ribulose 5-phosphate, xylulose 5-phosphate |                                                                                                |                           |                                      | 3.42                      |      |
| 565          |               | xylitol                                            |                                                                                                | <a href="#">C00379</a>    | <a href="#">HMDB00568</a>            | 1.00                      |      |
| 566          |               | arabinose                                          |                                                                                                | <a href="#">C00181</a>    | <a href="#">HMDB00646</a>            | 0.97                      |      |
| 569          |               | xylose                                             | <a href="#">C00181</a>                                                                         | <a href="#">HMDB00098</a> | 0.63                                 |                           |      |

Shaded cells indicate p≤0.05 (red=higher green=lower blue-bold 0.05<p<0.10)

T1: anaerobic T2: +CO2

| PATHWAY SORT | SUPER PATHWAY                      | SUB PATHWAY               | BIOCHEMICAL NAME                           | Kegg                          | HMDB                      | T1-0 C-0                  |
|--------------|------------------------------------|---------------------------|--------------------------------------------|-------------------------------|---------------------------|---------------------------|
| 570          |                                    |                           | xylonate                                   | <a href="#">C00502_C05411</a> |                           | 1.55                      |
| 579          | Energy                             | Krebs cycle               | citrate                                    | <a href="#">C00158</a>        | <a href="#">HMDB00094</a> | 0.94                      |
| 582          |                                    |                           | <b>cis-aconitate</b>                       | <a href="#">C00417</a>        | <a href="#">HMDB00072</a> | 0.98                      |
| 591          |                                    |                           | succinylcarnitine                          |                               |                           | 0.95                      |
| 594          |                                    |                           | fumarate                                   | <a href="#">C00122</a>        | <a href="#">HMDB00134</a> | 0.80                      |
| 598          |                                    |                           | malate                                     | <a href="#">C00149</a>        | <a href="#">HMDB00156</a> | 0.82                      |
| 601          |                                    |                           | Oxidative phosphorylation                  | acetylphosphate               | <a href="#">C00227</a>    | <a href="#">HMDB01494</a> |
| 602          |                                    | <b>phosphate</b>          |                                            | <a href="#">C00009</a>        | <a href="#">HMDB01429</a> | 0.76                      |
| 603          |                                    | pyrophosphate (PPi)       |                                            | <a href="#">C00013</a>        | <a href="#">HMDB00250</a> | 1.39                      |
| 604          |                                    | linoleate (18:2n6)        |                                            | <a href="#">C01595</a>        | <a href="#">HMDB00673</a> | 0.92                      |
| 608          |                                    | Essential fatty acid      | linolenate [alpha or gamma; (18:3n3 or 6)] | <a href="#">C06427</a>        | <a href="#">HMDB01388</a> | 1.19                      |
| 609          | dihomo-linolenate (20:3n3 or n6)   |                           | <a href="#">C03242</a>                     | <a href="#">HMDB02925</a>     | 0.98                      |                           |
| 610          | eicosapentaenoate (EPA; 20:5n3)    |                           | <a href="#">C06428</a>                     | <a href="#">HMDB01999</a>     | 1.29                      |                           |
| 611          | docosapentaenoate (n3 DPA; 22:5n3) |                           | <a href="#">C16513</a>                     | <a href="#">HMDB01976</a>     | 1.14                      |                           |
| 613          | docosahexaenoate (DHA; 22:6n3)     |                           | <a href="#">C06429</a>                     | <a href="#">HMDB02183</a>     | 1.08                      |                           |
| 618          | Medium chain fatty acid            |                           | caproate (6:0)                             | <a href="#">C01585</a>        | <a href="#">HMDB00535</a> | 0.85                      |
| 619          |                                    |                           | heptanoate (7:0)                           | <a href="#">C17714</a>        | <a href="#">HMDB00666</a> | 1.03                      |
| 620          |                                    |                           | caprylate (8:0)                            | <a href="#">C06423</a>        | <a href="#">HMDB00482</a> | 0.77                      |
| 621          |                                    | pelargonate (9:0)         | <a href="#">C01601</a>                     | <a href="#">HMDB00847</a>     | 1.05                      |                           |
| 622          |                                    | caprate (10:0)            | <a href="#">C01571</a>                     | <a href="#">HMDB00511</a>     | 0.98                      |                           |
| 625          |                                    | laurate (12:0)            | <a href="#">C02679</a>                     | <a href="#">HMDB00638</a>     | 1.07                      |                           |
| 629          |                                    | Long chain fatty acid     | myristate (14:0)                           | <a href="#">C06424</a>        | <a href="#">HMDB00806</a> | 0.93                      |
| 630          | myristoleate (14:1n5)              |                           | <a href="#">C08322</a>                     | <a href="#">HMDB02000</a>     | 0.49                      |                           |
| 631          | pentadecanoate (15:0)              |                           | <a href="#">C16537</a>                     | <a href="#">HMDB00826</a>     | 1.06                      |                           |
| 632          | palmitate (16:0)                   |                           | <a href="#">C00249</a>                     | <a href="#">HMDB00220</a>     | 0.93                      |                           |
| 633          | palmitoleate (16:1n7)              |                           | <a href="#">C08362</a>                     | <a href="#">HMDB03229</a>     | 1.00                      |                           |
| 635          | margarate (17:0)                   |                           |                                            | <a href="#">HMDB02259</a>     | 1.03                      |                           |
| 636          | 10-heptadecenoate (17:1n7)         |                           |                                            |                               | 1.06                      |                           |
| 637          | stearate (18:0)                    |                           | <a href="#">C01530</a>                     | <a href="#">HMDB00827</a>     | 0.97                      |                           |
| 639          | oleate (18:1n9)                    |                           | <a href="#">C00712</a>                     | <a href="#">HMDB00207</a>     | 0.91                      |                           |
| 641          | cis-vaccenate (18:1n7)             |                           | <a href="#">C08367</a>                     |                               | 0.83                      |                           |
| 655          | dihomo-linoleate (20:2n6)          |                           | <a href="#">C16525</a>                     |                               | 0.96                      |                           |
| 658          | mead acid (20:3n9)                 |                           |                                            | <a href="#">HMDB10378</a>     | 0.62                      |                           |
| 659          | arachidonate (20:4n6)              |                           | <a href="#">C00219</a>                     | <a href="#">HMDB01043</a>     | 1.04                      |                           |
| 665          | adrenate (22:4n6)                  |                           | <a href="#">C16527</a>                     | <a href="#">HMDB02226</a>     | 1.00                      |                           |
| 670.01       |                                    |                           | 9,10-epoxyoctadec-12(Z)-enoic acid         | <a href="#">C14825</a>        | <a href="#">HMDB04701</a> | 0.98                      |
| 672          | Fatty acid, oxidized               |                           | 9,10-epoxystearate                         |                               |                           | 0.87                      |
| 706          | Fatty acid, monohydroxy            |                           | 2-hydroxypalmitate                         |                               |                           | 0.60                      |
| 714          | Fatty acid, dicarboxylate          | <b>2-hydroxyglutarate</b> | <a href="#">C02630</a>                     | <a href="#">HMDB00606</a>     | 0.94                      |                           |
| 721          |                                    | azelate (nonanedioate)    | <a href="#">C08261</a>                     | <a href="#">HMDB00784</a>     | 1.27                      |                           |
| 735          | Fatty acid, amide                  | erucamide                 |                                            |                               | 1.18                      |                           |

Shaded cells indicate p≤0.05 (red=higher green=lower blue-bold 0.05<p<0.10)

T1: anaerobic T2: +CO2

| PATHWAY SORT | SUPER PATHWAY | SUB PATHWAY                                  | BIOCHEMICAL NAME                                   | Kegg                                          | HMDB                                               | T1-0 C-0                  |                        |
|--------------|---------------|----------------------------------------------|----------------------------------------------------|-----------------------------------------------|----------------------------------------------------|---------------------------|------------------------|
| 742          | Lipid         | Fatty acid, branched                         | 13-methylmyristic acid                             |                                               |                                                    | 0.90                      |                        |
| 744          |               |                                              | 15-methylpalmitate (isobar with 2-methylpalmitate) |                                               |                                                    | 1.01                      |                        |
| 809          |               | Fatty acid metabolism (also BCAA metabolism) | propionylcarnitine                                 | <a href="#">C03017</a>                        | <a href="#">HMDB00824</a>                          | 0.97                      |                        |
| 811          |               |                                              | butyrylcarnitine                                   |                                               |                                                    | 1.39                      |                        |
| 819          |               | Carnitine metabolism                         |                                                    | deoxycarnitine                                | <a href="#">C01181</a>                             | <a href="#">HMDB01161</a> | 1.03                   |
| 820          |               |                                              |                                                    | carnitine                                     |                                                    |                           | 1.07                   |
| 821          |               |                                              |                                                    | 3-dehydrocarnitine*                           | <a href="#">C02636</a>                             | <a href="#">HMDB12154</a> | 1.05                   |
| 822          |               |                                              |                                                    | acetylcarnitine                               | <a href="#">C02571</a>                             | <a href="#">HMDB00201</a> | 0.95                   |
| 823          |               |                                              |                                                    | hexanoylcarnitine                             | <a href="#">C01585</a>                             | <a href="#">HMDB00705</a> | <b>0.72</b>            |
| 825          |               |                                              |                                                    | octanoylcarnitine                             |                                                    |                           | 0.89                   |
| 833          |               |                                              |                                                    | palmitoylcarnitine                            |                                                    |                           | <b>4.95</b>            |
| 834          |               |                                              |                                                    | stearoylcarnitine                             |                                                    | <a href="#">HMDB00848</a> | 2.33                   |
| 835          |               |                                              |                                                    | oleoylcarnitine                               |                                                    | <a href="#">HMDB05065</a> | 3.40                   |
| 840          |               |                                              |                                                    | Bile acid metabolism                          |                                                    | glycocholate              | <a href="#">C01921</a> |
| 849          |               | glycodeoxycholate                            | <a href="#">C05464</a>                             |                                               |                                                    | <a href="#">HMDB00631</a> | 0.85                   |
| 851          |               | glycochenodeoxycholate                       | <a href="#">C05466</a>                             |                                               |                                                    | <a href="#">HMDB00637</a> | <b>0.78</b>            |
| 876          |               | Glycerolipid metabolism                      |                                                    | ethanolamine                                  | <a href="#">C00189</a>                             | <a href="#">HMDB00149</a> | 0.88                   |
| 877          |               |                                              |                                                    | phosphoethanolamine                           | <a href="#">C00346</a>                             | <a href="#">HMDB00224</a> | <b>2.29</b>            |
| 881          |               |                                              |                                                    | choline                                       |                                                    |                           | 1.03                   |
| 882          |               |                                              |                                                    | glycerol 3-phosphate (G3P)                    | <a href="#">C00093</a>                             | <a href="#">HMDB00126</a> | <b>2.58</b>            |
| 883          |               |                                              |                                                    | glycerophosphorylcholine (GPC)                | <a href="#">C00670</a>                             | <a href="#">HMDB00086</a> | 0.90                   |
| 890          |               | Inositol metabolism                          |                                                    | myo-inositol                                  | <a href="#">C00137</a>                             | <a href="#">HMDB00211</a> | 0.98                   |
| 905          |               | Ketone bodies                                |                                                    | 1,2-propanediol                               | <a href="#">C00717,C02912,C00583,C01506,C02917</a> | <a href="#">HMDB01881</a> | 0.89                   |
| 909          |               | Lysolipid                                    |                                                    | 1-palmitoylglycerophosphoethanolamine         |                                                    | <a href="#">HMDB11503</a> | <b>0.44</b>            |
| 915          |               |                                              |                                                    | 1-oleoylglycerophosphoethanolamine            |                                                    | <a href="#">HMDB11506</a> | 0.62                   |
| 919          |               |                                              |                                                    | 1-arachidonoylglycerophosphoethanolamine*     |                                                    | <a href="#">HMDB11517</a> | <b>0.53</b>            |
| 920          |               |                                              |                                                    | 2-arachidonoylglycerophosphoethanolamine*     |                                                    |                           | 2.90                   |
| 922          |               |                                              |                                                    | 2-docosapentaenoylglycerophosphoethanolamine* |                                                    |                           | 2.70                   |
| 923          |               |                                              |                                                    | 2-docosahexaenoylglycerophosphoethanolamine*  |                                                    |                           | 2.09                   |
| 926          |               |                                              |                                                    | 1-myristoylglycerophosphocholine              |                                                    | <a href="#">HMDB10379</a> | 1.00                   |
| 929          |               |                                              |                                                    | 1-palmitoylglycerophosphocholine              |                                                    |                           | 2.76                   |
| 930          |               |                                              |                                                    | 2-palmitoylglycerophosphocholine*             |                                                    |                           | 1.05                   |
| 934          |               |                                              |                                                    | 1-stearoylglycerophosphocholine               |                                                    |                           | 2.34                   |
| 935          |               |                                              |                                                    | 2-stearoylglycerophosphocholine*              |                                                    |                           | 1.00                   |
| 936          |               |                                              |                                                    | 1-oleoylglycerophosphocholine                 |                                                    |                           | 2.32                   |
| 937          |               |                                              |                                                    | 2-oleoylglycerophosphocholine*                |                                                    |                           | 1.66                   |
| 938          |               |                                              |                                                    | 1-linoleoylglycerophosphocholine              | <a href="#">C04100</a>                             |                           | 0.75                   |
| 939          |               |                                              |                                                    | 2-linoleoylglycerophosphocholine*             |                                                    |                           | 1.00                   |



Shaded cells indicate  $p \leq 0.05$  (red=higher green=lower blue-bold  $0.05 < p < 0.10$ )

T1: anaerobic T2: +CO2

| PATHWAY SORT | SUPER PATHWAY                            | SUB PATHWAY                              | BIOCHEMICAL NAME                                     | Kegg                        | HMDB                      | T1-0 C-0                  |      |
|--------------|------------------------------------------|------------------------------------------|------------------------------------------------------|-----------------------------|---------------------------|---------------------------|------|
| 945          |                                          |                                          | 2-arachidonoylglycerophosphocholine*                 |                             |                           | 1.78                      |      |
| 970          |                                          | Monoacylglycerol                         | 1-palmitoylglycerol (1-monopalmitin)                 |                             |                           | 0.82                      |      |
| 1004         |                                          | Sphingolipid                             | palmitoyl sphingomyelin                              |                             |                           | 0.85                      |      |
| 1005         | stearyl sphingomyelin                    |                                          | <a href="#">C00550</a>                               | <a href="#">HMDB01348</a>   | 0.92                      |                           |      |
| 1018         |                                          | Sterol/Steroid                           | lathosterol                                          | <a href="#">C01189</a>      | <a href="#">HMDB01170</a> | 0.70                      |      |
| 1020         | cholesterol                              |                                          | <a href="#">C00187</a>                               | <a href="#">HMDB00067</a>   | 0.94                      |                           |      |
| 1024         | 7-beta-hydroxycholesterol                |                                          | <a href="#">C03594</a>                               | <a href="#">HMDB06119</a>   | 1.20                      |                           |      |
| 1034         | androsterone sulfate                     |                                          | <a href="#">C00523</a>                               | <a href="#">HMDB02759</a>   | 1.25                      |                           |      |
| 1057         | beta-sitosterol                          |                                          | <a href="#">C01753</a>                               | <a href="#">HMDB00852</a>   | 1.48                      |                           |      |
| 1059         | campesterol                              |                                          | <a href="#">C01789</a>                               | <a href="#">HMDB02869</a>   | 1.03                      |                           |      |
| 1098         |                                          |                                          | Purine metabolism, (hypo)xanthine/inosine containing | hypoxanthine                | <a href="#">C00262</a>    | <a href="#">HMDB00157</a> | 0.91 |
| 1101         | inosine 5'-monophosphate (IMP)           | <a href="#">C00130</a>                   |                                                      | <a href="#">HMDB00175</a>   | 1.10                      |                           |      |
| 1105         |                                          | Purine metabolism, adenine containing    | adenine                                              | <a href="#">C00147</a>      | <a href="#">HMDB00034</a> | 0.93                      |      |
| 1106         | adenosine                                |                                          | <a href="#">C00212</a>                               | <a href="#">HMDB00050</a>   | 0.64                      |                           |      |
| 1114         | adenosine 5'-monophosphate (AMP)         |                                          | <a href="#">C00020</a>                               | <a href="#">HMDB00045</a>   | 1.19                      |                           |      |
| 1116         | adenosine 5'-diphosphate (ADP)           |                                          | <a href="#">C00008</a>                               | <a href="#">HMDB01341</a>   | 1.05                      |                           |      |
| 1128         |                                          | Purine metabolism, guanine containing    | guanosine                                            | <a href="#">C00387</a>      | <a href="#">HMDB00133</a> | 1.20                      |      |
| 1149         |                                          | Purine metabolism, urate metabolism      | urate                                                | <a href="#">C00366</a>      | <a href="#">HMDB00289</a> | 0.96                      |      |
| 1150         | allantoin                                |                                          | <a href="#">C02350</a>                               | <a href="#">HMDB00462</a>   | 0.62                      |                           |      |
| 1180         |                                          | Pyrimidine metabolism, uracil containing | uridine                                              | <a href="#">C00299</a>      | <a href="#">HMDB00296</a> | 1.15                      |      |
| 1181         | pseudouridine                            |                                          | <a href="#">C02067</a>                               | <a href="#">HMDB00767</a>   | <b>0.64</b>               |                           |      |
| 1199         |                                          | Ascorbate and aldarate metabolism        | threonate                                            | <a href="#">C01620</a>      | <a href="#">HMDB00943</a> | 0.83                      |      |
| 1202         | arabonate                                |                                          |                                                      | <a href="#">HMDB00539</a>   | 1.12                      |                           |      |
| 1212         |                                          | Hemoglobin and porphyrin metabolism      | heme*                                                |                             |                           | 3.72                      |      |
| 1216         | biliverdin                               |                                          | <a href="#">C00500</a>                               | <a href="#">HMDB01008</a>   | 0.99                      |                           |      |
| 1221         |                                          | Cofactors and vitamins                   | nicotinamide                                         | <a href="#">C00153</a>      | <a href="#">HMDB01406</a> | 0.87                      |      |
| 1224         | nicotinamide adenine dinucleotide (NAD+) |                                          | <a href="#">C00003</a>                               | <a href="#">HMDB00902</a>   | <b>2.14</b>               |                           |      |
| 1232         |                                          |                                          | Nicotinate and nicotinamide metabolism               | adenosine 5'diphosphoribose | <a href="#">C00301</a>    | <a href="#">HMDB01178</a> | 1.08 |
| 1242         | trigonelline (N'-methylnicotinate)       |                                          |                                                      |                             | <a href="#">HMDB00875</a> | 0.97                      |      |

Shaded cells indicate  $p \leq 0.05$  (red=higher green=lower blue-bold  $0.05 < p < 0.10$ )

T1: anaerobic T2: +CO2

| PATHWAY SORT | SUPER PATHWAY | SUB PATHWAY                     | BIOCHEMICAL NAME                                  | Kegg                   | HMDB                      | T1-0<br>C-0 |
|--------------|---------------|---------------------------------|---------------------------------------------------|------------------------|---------------------------|-------------|
| 1242.1       |               |                                 | N1-Methyl-2-pyridone-5-carboxamide                | <a href="#">C05842</a> | <a href="#">HMDB04193</a> | 1.14        |
| 1243         |               | Pantothenate and CoA metabolism | pantothenate                                      | <a href="#">C00864</a> | <a href="#">HMDB00210</a> | 0.99        |
| 1266         |               | Tocopherol metabolism           | alpha-tocopherol                                  | <a href="#">C02477</a> | <a href="#">HMDB01893</a> | 0.71        |
| 1288         | Xenobiotics   | Benzoate metabolism             | hippurate                                         | <a href="#">C01586</a> | <a href="#">HMDB00714</a> | 0.99        |
| 1300         |               |                                 | catechol sulfate                                  | <a href="#">C00090</a> |                           | 1.02        |
| 1318         |               |                                 | glycolate (hydroxyacetate)                        | <a href="#">C00160</a> | <a href="#">HMDB00115</a> | 0.87        |
| 1360         |               | Chemical                        | 2-ethylhexanoate (isobar with 2-propylpentanoate) |                        |                           | 0.89        |
| 1469         |               | Drug                            | ranitidine                                        | <a href="#">422</a>    | <a href="#">HMDB01930</a> | 0.97        |
| 1531         |               | Food component/Plant            | piperine                                          | <a href="#">C03882</a> |                           | 0.76        |
| 1565         |               |                                 | ergothioneine                                     | <a href="#">C05570</a> | <a href="#">HMDB03045</a> | 0.87        |
| 1584         |               |                                 | stachydrine                                       | <a href="#">C10172</a> | <a href="#">HMDB04827</a> | 0.90        |
| 1585         |               |                                 | homostachydrine*                                  | <a href="#">C08283</a> |                           | 1.04        |
| 1612         |               | Xanthine metabolism             | caffeine                                          | <a href="#">C07481</a> | <a href="#">HMDB01847</a> | 0.93        |
| 1613         |               |                                 | paraxanthine                                      | <a href="#">C13747</a> | <a href="#">HMDB01860</a> | 1.02        |
| 1614         |               |                                 | theobromine                                       | <a href="#">C07480</a> | <a href="#">HMDB02825</a> | 0.97        |
| 1615         |               |                                 | theophylline                                      | <a href="#">C07130</a> | <a href="#">HMDB01889</a> | 0.90        |
| 1632         |               | Sugar, sugar substitute, starch | <b>erythritol</b>                                 | <a href="#">C00503</a> | <a href="#">HMDB02994</a> | 0.99        |
| 1662         |               | Phthalate                       | terephthalic acid                                 | <a href="#">C06337</a> | <a href="#">HMDB02428</a> | 0.84        |

| PATHWAY<br>SORT | ANVOA Contrasts |               |               |               | ANVOA Contrasts |             |               |               |               | ANVOA Contrasts |              |                |                |
|-----------------|-----------------|---------------|---------------|---------------|-----------------|-------------|---------------|---------------|---------------|-----------------|--------------|----------------|----------------|
|                 | T1-7<br>C-7     | T1-14<br>C-14 | T1-21<br>C-21 | T1-28<br>C-28 | T2-0<br>C-0     | T2-7<br>C-7 | T2-14<br>C-14 | T2-21<br>C-21 | T2-28<br>C-28 | T2-0<br>T1-0    | T2-7<br>T1-7 | T2-14<br>T1-14 | T2-21<br>T1-21 |
| 1               | 1.08            | 0.77          | 1.03          | 1.04          | 1.03            | 1.06        | 0.96          | 1.02          | 1.23          | 1.07            | 0.98         | 1.25           | 0.99           |
| 3               | 0.85            | 1.03          | 0.74          | 0.79          | 0.81            | 0.88        | 0.89          | 1.39          | 0.91          | 1.07            | 1.04         | 0.86           | 1.88           |
| 4               | 1.04            | 0.86          | 1.13          | 1.22          | 0.76            | 0.78        | 1.24          | 0.81          | 0.99          | 1.00            | 0.75         | 1.44           | 0.72           |
| 7               | 1.18            | 0.94          | 1.19          | 1.07          | 0.86            | 1.09        | 1.00          | 0.89          | 1.17          | 1.01            | 0.92         | 1.07           | 0.75           |
| 8               | 1.20            | 0.97          | 1.37          | 1.23          | 1.04            | 1.14        | 0.95          | 1.05          | 1.01          | 1.08            | 0.95         | 0.98           | 0.77           |
| 17              | 1.28            | 1.27          | 1.06          | 1.13          | 1.05            | 1.28        | 1.21          | 0.91          | 1.02          | 1.04            | 1.00         | 0.95           | 0.86           |
| 22              | 1.14            | 1.08          | 1.09          | 1.12          | 1.01            | 0.98        | 1.01          | 0.90          | 0.95          | 1.00            | 0.86         | 0.94           | 0.83           |
| 24              | 1.38            | 1.22          | 1.53          | 1.09          | 0.93            | 0.88        | 0.93          | 1.07          | 0.88          | 0.85            | 0.64         | 0.76           | 0.70           |
| 25              | 1.25            | 0.94          | 1.36          | 1.20          | 1.13            | 1.17        | 1.03          | 1.17          | 0.88          | 1.09            | 0.94         | 1.09           | 0.86           |
| 26              | 1.23            | 1.10          | 1.98          | 1.06          | 1.02            | 1.47        | 1.48          | 1.85          | 0.47          | 1.32            | 1.20         | 1.35           | 0.94           |
| 27              | 0.96            | 0.73          | 1.06          | 0.97          | 1.02            | 1.06        | 0.96          | 1.05          | 1.06          | 1.20            | 1.11         | 1.31           | 0.99           |
| 39              | 1.37            | 0.93          | 1.19          | 1.12          | 1.01            | 1.08        | 1.01          | 1.07          | 1.26          | 0.96            | 0.79         | 1.09           | 0.90           |
| 44              | 0.90            | 0.87          | 0.80          | 0.83          | 1.05            | 1.01        | 1.07          | 1.03          | 0.98          | 1.04            | 1.12         | 1.23           | 1.29           |
| 45              | 1.04            | 1.10          | 1.17          | 1.06          | 1.17            | 1.02        | 0.99          | 0.95          | 1.04          | 1.15            | 0.98         | 0.90           | 0.82           |
| 50              | 1.01            | 0.98          | 1.42          | 1.28          | 1.17            | 1.07        | 0.98          | 1.09          | 1.12          | 0.89            | 1.06         | 1.00           | 0.77           |
| 69              | 1.18            | 0.86          | 1.75          | 1.55          | 1.09            | 1.20        | 0.81          | 1.75          | 0.96          | 1.08            | 1.02         | 0.93           | 1.00           |
| 74              | 1.08            | 1.11          | 1.00          | 0.99          | 0.99            | 1.00        | 0.89          | 0.94          | 1.00          | 1.11            | 0.92         | 0.80           | 0.94           |
| 75              | 0.76            | 0.91          | 0.88          | 1.04          | 1.12            | 0.74        | 0.93          | 0.87          | 0.90          | 1.04            | 0.96         | 1.02           | 0.99           |
| 80              | 0.74            | 1.20          | 0.87          | 0.59          | 1.35            | 1.17        | 0.92          | 0.71          | 0.70          | 1.50            | 1.58         | 0.76           | 0.81           |
| 83              | 1.17            | 1.12          | 1.07          | 1.11          | 1.10            | 1.00        | 1.11          | 0.99          | 0.98          | 1.04            | 0.85         | 0.99           | 0.92           |
| 88              | 1.07            | 0.93          | 1.13          | 1.05          | 1.08            | 1.01        | 0.95          | 0.89          | 1.03          | 1.16            | 0.94         | 1.02           | 0.79           |
| 99              | 1.18            | 1.10          | 1.06          | 1.13          | 1.06            | 1.01        | 1.09          | 0.99          | 1.06          | 1.02            | 0.85         | 0.99           | 0.93           |
| 128             | 1.22            | 0.99          | 1.09          | 0.94          | 1.21            | 1.02        | 0.97          | 0.94          | 1.05          | 1.13            | 0.83         | 0.98           | 0.86           |
| 135             | 1.23            | 0.92          | 0.89          | 1.18          | 1.09            | 1.15        | 0.88          | 0.77          | 1.09          | 1.07            | 0.94         | 0.96           | 0.87           |
| 144             | 1.29            | 1.35          | 0.98          | 1.05          | 0.93            | 1.14        | 1.10          | 1.01          | 0.93          | 0.81            | 0.88         | 0.81           | 1.03           |
| 145             | 1.21            | 1.08          | 1.09          | 1.12          | 1.12            | 1.07        | 1.08          | 1.01          | 0.99          | 1.13            | 0.88         | 1.00           | 0.93           |
| 151             | 1.10            | 0.96          | 1.07          | 1.16          | 1.09            | 1.10        | 1.00          | 0.90          | 1.09          | 1.19            | 1.00         | 1.04           | 0.84           |
| 164             | 0.86            | 0.93          | 0.91          | 0.84          | 1.04            | 0.83        | 1.19          | 0.92          | 0.78          | 1.08            | 0.96         | 1.28           | 1.01           |
| 170             | 0.96            | 1.02          | 1.33          | 0.94          | 1.29            | 0.99        | 0.98          | 1.19          | 1.13          | 1.39            | 1.03         | 0.96           | 0.89           |
| 172             | 0.20            | 0.13          | 0.17          | 0.27          | 0.93            | 1.23        | 1.03          | 0.71          | 0.95          | 2.23            | 6.06         | 8.18           | 4.10           |
| 173             | 0.49            | 0.22          | 0.25          | 0.34          | 1.09            | 1.01        | 0.92          | 0.89          | 1.04          | 1.34            | 2.09         | 4.16           | 3.60           |
| 179             | 2.80            | 2.20          | 1.42          | 1.19          | 1.00            | 1.00        | 1.00          | 0.96          | 1.22          | 1.00            | 0.36         | 0.46           | 0.67           |
| 180             | 1.33            | 1.33          | 1.38          | 1.32          | 1.11            | 0.97        | 1.04          | 1.00          | 1.04          | 1.04            | 0.73         | 0.78           | 0.72           |
| 181             | 1.31            | 1.22          | 1.35          | 1.23          | 1.08            | 1.04        | 1.03          | 1.01          | 1.09          | 1.10            | 0.80         | 0.84           | 0.75           |
| 190             | 1.18            | 1.07          | 1.09          | 1.09          | 1.09            | 1.07        | 1.10          | 0.96          | 1.02          | 1.05            | 0.90         | 1.03           | 0.88           |
| 193             | 0.42            | 0.18          | 0.27          | 0.38          | 1.20            | 1.17        | 1.10          | 0.88          | 1.12          | 1.50            | 2.77         | 6.13           | 3.27           |
| 198             | 3.79            | 3.11          | 3.27          | 2.58          | 1.15            | 1.00        | 0.86          | 0.91          | 1.13          | 0.80            | 0.26         | 0.28           | 0.28           |
| 200             | 1.02            | 0.99          | 1.05          | 0.99          | 1.18            | 1.09        | 1.13          | 0.92          | 1.03          | 1.11            | 1.07         | 1.14           | 0.88           |
| 202             | 0.83            | 0.58          | 0.85          | 0.97          | 0.96            | 0.86        | 0.88          | 0.70          | 1.23          | 1.10            | 1.05         | 1.51           | 0.82           |
| 205             | 1.10            | 0.87          | 0.98          | 1.08          | 0.99            | 0.96        | 0.81          | 0.83          | 1.13          | 1.06            | 0.87         | 0.93           | 0.84           |
| 206             | 1.06            | 0.98          | 1.04          | 1.09          | 1.23            | 0.99        | 1.01          | 0.95          | 1.08          | 1.27            | 0.93         | 1.03           | 0.92           |

| PATHWAY<br>SORT | ANOVA Contrasts |               |               |               | ANOVA Contrasts |             |               |               |               | ANOVA Contrasts |              |                |                |
|-----------------|-----------------|---------------|---------------|---------------|-----------------|-------------|---------------|---------------|---------------|-----------------|--------------|----------------|----------------|
|                 | T1-7<br>C-7     | T1-14<br>C-14 | T1-21<br>C-21 | T1-28<br>C-28 | T2-0<br>C-0     | T2-7<br>C-7 | T2-14<br>C-14 | T2-21<br>C-21 | T2-28<br>C-28 | T2-0<br>T1-0    | T2-7<br>T1-7 | T2-14<br>T1-14 | T2-21<br>T1-21 |
| 213             | 0.66            | 0.73          | 1.21          | 0.88          | 0.98            | 0.89        | 0.92          | 1.29          | 1.12          | 1.24            | 1.34         | 1.26           | 1.07           |
| 216             | 0.80            | 0.83          | 1.43          | 1.09          | 1.06            | 0.84        | 0.68          | 1.17          | 1.01          | 1.28            | 1.05         | 0.82           | 0.82           |
| 224             | 1.01            | 0.93          | 0.78          | 0.99          | 1.15            | 1.07        | 0.94          | 0.72          | 1.08          | 1.16            | 1.06         | 1.02           | 0.91           |
| 225             | 1.02            | 1.08          | 1.02          | 1.14          | 1.13            | 0.98        | 1.11          | 0.93          | 1.09          | 1.03            | 0.96         | 1.03           | 0.91           |
| 227             | 1.28            | 0.76          | 1.06          | 0.94          | 1.14            | 1.07        | 0.76          | 1.01          | 0.98          | 1.32            | 0.83         | 1.00           | 0.95           |
| 229             | 1.15            | 0.96          | 1.27          | 1.00          | 1.03            | 1.05        | 0.97          | 1.08          | 0.93          | 0.98            | 0.91         | 1.02           | 0.85           |
| 231             | 0.77            | 1.24          | 1.54          | 1.25          | 0.58            | 0.59        | 0.80          | 0.92          | 0.77          | 0.79            | 0.76         | 0.64           | 0.60           |
| 241             | 1.06            | 0.81          | 0.77          | 1.44          | 1.36            | 0.77        | 0.69          | 0.45          | 2.07          | 1.06            | 0.73         | 0.86           | 0.59           |
| 244             | 1.12            | 0.99          | 1.55          | 1.15          | 1.02            | 1.13        | 1.06          | 1.29          | 0.82          | 1.16            | 1.02         | 1.07           | 0.83           |
| 245             | 1.17            | 0.95          | 1.28          | 1.10          | 1.02            | 1.06        | 1.03          | 1.03          | 0.99          | 1.10            | 0.90         | 1.09           | 0.80           |
| 246             | 1.05            | 0.94          | 1.09          | 1.10          | 1.09            | 1.11        | 0.95          | 0.88          | 1.10          | 1.15            | 1.06         | 1.01           | 0.81           |
| 248             | 1.08            | 1.01          | 1.08          | 1.14          | 1.09            | 1.08        | 0.96          | 0.95          | 1.01          | 0.96            | 1.00         | 0.95           | 0.88           |
| 252             | 1.06            | 1.17          | 0.98          | 1.06          | 1.17            | 0.89        | 0.94          | 1.03          | 0.96          | 1.20            | 0.84         | 0.80           | 1.05           |
| 259             | 1.09            | 1.01          | 1.06          | 1.07          | 1.10            | 1.06        | 1.00          | 0.90          | 1.02          | 1.12            | 0.97         | 0.99           | 0.85           |
| 260             | 1.22            | 1.16          | 1.08          | 1.17          | 1.00            | 1.43        | 1.07          | 1.00          | 0.96          | 1.02            | 1.17         | 0.92           | 0.92           |
| 263             | 1.09            | 0.93          | 1.30          | 1.19          | 0.92            | 1.15        | 0.97          | 1.13          | 1.01          | 1.05            | 1.05         | 1.05           | 0.87           |
| 266             | 1.49            | 1.38          | 1.27          | 1.14          | 1.14            | 1.15        | 1.23          | 1.24          | 1.05          | 1.07            | 0.78         | 0.89           | 0.98           |
| 270             | 1.05            | 0.93          | 0.95          | 0.97          | 1.11            | 1.09        | 1.06          | 0.88          | 1.01          | 1.16            | 1.03         | 1.14           | 0.93           |
| 280             | 1.02            | 0.98          | 0.89          | 0.93          | 1.11            | 0.90        | 1.07          | 0.97          | 0.90          | 1.06            | 0.88         | 1.10           | 1.08           |
| 281             | 1.33            | 1.48          | 1.03          | 0.59          | 1.15            | 1.13        | 1.01          | 1.09          | 0.68          | 1.02            | 0.85         | 0.68           | 1.06           |
| 282             | 1.49            | 1.24          | 1.29          | 1.09          | 1.05            | 1.09        | 1.05          | 1.00          | 1.26          | 1.00            | 0.73         | 0.85           | 0.77           |
| 283             | 0.99            | 0.93          | 0.91          | 0.79          | 1.07            | 0.93        | 1.01          | 0.97          | 0.88          | 0.99            | 0.94         | 1.09           | 1.07           |
| 285             | 2.19            | 1.75          | 1.43          | 1.00          | 1.09            | 1.23        | 0.88          | 1.13          | 1.00          | 0.91            | 0.56         | 0.50           | 0.79           |
| 404             | 1.33            | 1.44          | 1.10          | 1.12          | 1.30            | 0.84        | 1.06          | 0.93          | 1.06          | 1.11            | 0.63         | 0.74           | 0.85           |
| 453             | 1.43            | 1.68          | 3.18          | 2.48          | 0.87            | 1.06        | 0.98          | 1.01          | 0.94          | 1.08            | 0.74         | 0.58           | 0.32           |
| 455             | 1.84            | 0.64          | 1.58          | 1.44          | 1.24            | 1.38        | 0.79          | 1.06          | 0.76          | 1.04            | 0.75         | 1.23           | 0.67           |
| 472             | 0.74            | 0.63          | 1.24          | 1.23          | 1.02            | 1.03        | 0.94          | 1.04          | 0.91          | 1.20            | 1.38         | 1.51           | 0.84           |
| 478             | 1.47            | 0.72          | 1.23          | 1.09          | 1.06            | 1.36        | 0.91          | 1.02          | 0.90          | 0.75            | 0.93         | 1.26           | 0.83           |
| 482             | 1.20            | 0.87          | 1.31          | 1.12          | 0.80            | 1.04        | 0.92          | 0.97          | 0.94          | 1.04            | 0.87         | 1.06           | 0.74           |
| 487             | 0.94            | 0.80          | 1.19          | 1.03          | 0.99            | 0.97        | 0.92          | 1.01          | 1.01          | 1.07            | 1.03         | 1.14           | 0.85           |
| 489             | 1.03            | 0.87          | 1.18          | 0.91          | 1.01            | 1.12        | 0.77          | 0.64          | 0.83          | 2.01            | 1.08         | 0.88           | 0.54           |
| 496             | 1.15            | 1.14          | 1.09          | 1.04          | 1.13            | 1.01        | 1.07          | 1.00          | 1.02          | 0.99            | 0.88         | 0.94           | 0.92           |
| 501             | 0.80            | 0.67          | 1.36          | 1.00          | 0.98            | 1.18        | 0.90          | 1.34          | 0.83          | 0.90            | 1.47         | 1.34           | 0.99           |

| PATHWAY<br>SORT | ANVOA Contrasts |               |               |               | ANVOA Contrasts |             |               |               |               | ANVOA Contrasts |              |                |                |
|-----------------|-----------------|---------------|---------------|---------------|-----------------|-------------|---------------|---------------|---------------|-----------------|--------------|----------------|----------------|
|                 | T1-7<br>C-7     | T1-14<br>C-14 | T1-21<br>C-21 | T1-28<br>C-28 | T2-0<br>C-0     | T2-7<br>C-7 | T2-14<br>C-14 | T2-21<br>C-21 | T2-28<br>C-28 | T2-0<br>T1-0    | T2-7<br>T1-7 | T2-14<br>T1-14 | T2-21<br>T1-21 |
| 515             | 1.12            | 0.73          | 1.55          | 0.91          | 1.09            | 1.18        | 0.91          | 1.01          | 0.91          | 1.13            | 1.05         | 1.24           | 0.65           |
| 517             | 3.99            | 4.75          | 6.84          | 5.85          | 0.99            | 0.83        | 0.67          | 0.87          | 0.73          | 0.81            | 0.21         | 0.14           | 0.13           |
| 519             | 0.15            | 0.50          | 1.02          | 0.87          | 1.05            | 1.07        | 0.75          | 0.54          | 0.91          | 6.31            | 7.07         | 1.50           | 0.52           |
| 521             | 1.09            | 0.90          | 1.12          | 1.05          | 1.00            | 1.02        | 0.97          | 0.98          | 1.07          | 1.08            | 0.93         | 1.07           | 0.87           |
| 523             | 1.58            | 1.19          | 1.33          | 1.08          | 0.80            | 1.00        | 0.70          | 1.11          | 0.92          | 1.23            | 0.63         | 0.59           | 0.84           |
| 524             | 0.79            | 0.90          | 0.83          | 0.92          | 0.93            | 0.99        | 0.69          | 0.57          | 0.94          | 2.15            | 1.25         | 0.77           | 0.69           |
| 527             | 9.29            | 1.51          | 0.70          | 0.70          | 1.27            | 1.26        | 1.07          | 0.84          | 1.22          | 0.30            | 0.14         | 0.71           | 1.20           |
| 529             | 2.57            | 2.08          | 1.71          | 1.22          | 1.08            | 1.09        | 0.67          | 0.59          | 0.78          | 0.54            | 0.43         | 0.32           | 0.35           |
| 531             | 159.45          | 6.22          | 6.38          | 2.15          | 0.26            | 2.19        | 0.15          | 2.32          | 0.83          | 0.01            | 0.01         | 0.02           | 0.36           |
| 532             | 1.00            | 1.11          | 1.61          | 1.16          | 0.96            | 1.26        | 1.30          | 1.06          | 0.97          | 0.90            | 1.26         | 1.17           | 0.66           |
| 533             | 3.69            | 10.24         | 21.23         | 5.29          | 1.29            | 0.97        | 0.70          | 0.56          | 0.52          | 0.86            | 0.26         | 0.07           | 0.03           |
| 534             | 2.25            | 3.74          | 3.57          | 2.01          | 1.20            | 0.82        | 0.60          | 0.52          | 0.90          | 0.78            | 0.37         | 0.16           | 0.14           |
| 535             | 0.05            | 0.08          | 2.72          | 6.13          | 0.88            | 1.38        | 1.06          | 0.86          | 0.95          | 27.14           | 30.41        | 12.94          | 0.31           |
| 536             | 1.74            | 1.28          | 1.61          | 1.47          | 1.08            | 1.14        | 0.94          | 0.94          | 0.95          | 0.75            | 0.65         | 0.73           | 0.58           |
| 545             | 0.77            | 1.49          | 1.75          | 1.10          | 0.75            | 0.93        | 0.84          | 0.88          | 1.46          | 2.27            | 1.22         | 0.57           | 0.50           |
| 546             | 1.82            | 1.35          | 1.87          | 1.49          | 1.04            | 1.10        | 0.91          | 1.14          | 0.87          | 1.20            | 0.61         | 0.68           | 0.61           |
| 548             | 6.11            | 6.08          | 8.14          | 6.35          | 0.96            | 1.31        | 0.93          | 1.00          | 1.01          | 1.03            | 0.21         | 0.15           | 0.12           |
| 549             | 1.28            | 1.05          | 1.76          | 1.25          | 1.04            | 1.00        | 0.91          | 1.07          | 0.93          | 0.96            | 0.78         | 0.87           | 0.61           |
| 551             | 0.06            | 0.11          | 0.40          | 0.72          | 1.30            | 0.57        | 3.02          | 1.00          | 0.44          | 10.24           | 9.93         | 27.71          | 2.48           |
| 557             | 3.04            | 1.78          | 1.22          | 0.97          | 0.99            | 1.05        | 0.74          | 0.86          | 0.95          | 0.52            | 0.34         | 0.42           | 0.70           |
| 559             | 5.41            | 3.90          | 1.79          | 1.75          | 4.31            | 0.57        | 1.00          | 1.10          | 0.91          | 0.87            | 0.10         | 0.26           | 0.62           |
| 561             | 6.45            | 2.51          | 0.87          | 0.59          | 0.68            | 1.35        | 0.59          | 0.92          | 0.90          | 0.20            | 0.21         | 0.24           | 1.07           |
| 565             | 15.80           | 15.59         | 8.80          | 5.09          | 1.00            | 1.00        | 0.97          | 1.19          | 1.00          | 1.00            | 0.06         | 0.06           | 0.14           |
| 566             | 1.43            | 0.87          | 1.59          | 1.30          | 1.07            | 0.97        | 0.96          | 1.01          | 1.18          | 1.09            | 0.68         | 1.10           | 0.63           |
| 569             | 1.12            | 2.60          | 6.53          | 5.57          | 0.77            | 0.87        | 0.69          | 0.85          | 1.53          | 1.21            | 0.77         | 0.26           | 0.13           |

| PATHWAY<br>SORT | ANVOA Contrasts |               |               |               | ANVOA Contrasts |             |               |               |               | ANVOA Contrasts |              |                |                |
|-----------------|-----------------|---------------|---------------|---------------|-----------------|-------------|---------------|---------------|---------------|-----------------|--------------|----------------|----------------|
|                 | T1-7<br>C-7     | T1-14<br>C-14 | T1-21<br>C-21 | T1-28<br>C-28 | T2-0<br>C-0     | T2-7<br>C-7 | T2-14<br>C-14 | T2-21<br>C-21 | T2-28<br>C-28 | T2-0<br>T1-0    | T2-7<br>T1-7 | T2-14<br>T1-14 | T2-21<br>T1-21 |
| 570             | 1.46            | 1.07          | 1.74          | 1.17          | 1.32            | 0.99        | 0.89          | 0.88          | 1.04          | 0.85            | 0.68         | 0.83           | 0.50           |
| 579             | 1.12            | 0.88          | 1.16          | 0.83          | 1.01            | 1.00        | 0.92          | 1.03          | 1.06          | 1.08            | 0.89         | 1.04           | 0.88           |
| 582             | 1.28            | 1.08          | 1.32          | 1.48          | 1.08            | 1.25        | 1.08          | 1.04          | 1.54          | 1.11            | 0.98         | 1.00           | 0.79           |
| 591             | 1.11            | 0.98          | 1.07          | 1.14          | 1.09            | 1.14        | 1.03          | 0.85          | 1.07          | 1.15            | 1.03         | 1.05           | 0.80           |
| 594             | 1.28            | 1.10          | 1.51          | 1.19          | 0.85            | 0.88        | 0.70          | 0.69          | 1.21          | 1.05            | 0.69         | 0.64           | 0.45           |
| 598             | 1.67            | 1.30          | 1.87          | 1.08          | 1.02            | 1.12        | 0.75          | 0.84          | 0.92          | 1.24            | 0.67         | 0.57           | 0.45           |
| 601             | 1.09            | 0.93          | 1.30          | 1.05          | 1.09            | 1.13        | 1.07          | 1.18          | 0.99          | 1.21            | 1.04         | 1.16           | 0.91           |
| 602             | 0.74            | 0.53          | 0.94          | 0.95          | 0.99            | 1.07        | 0.91          | 1.00          | 1.00          | 1.29            | 1.46         | 1.70           | 1.07           |
| 603             | 0.68            | 1.24          | 3.53          | 0.98          | 1.13            | 1.11        | 1.44          | 3.70          | 0.68          | 0.81            | 1.64         | 1.16           | 1.05           |
| 604             | 1.25            | 1.09          | 1.15          | 1.35          | 1.02            | 1.15        | 0.93          | 0.73          | 1.38          | 1.11            | 0.92         | 0.85           | 0.63           |
| 608             | 1.31            | 1.08          | 1.21          | 1.18          | 0.96            | 1.26        | 1.04          | 0.85          | 1.26          | 0.80            | 0.96         | 0.96           | 0.70           |
| 609             | 1.32            | 0.95          | 1.06          | 1.43          | 1.14            | 1.44        | 0.84          | 0.75          | 1.61          | 1.16            | 1.09         | 0.89           | 0.70           |
| 610             | 1.35            | 1.29          | 1.00          | 1.06          | 0.96            | 1.29        | 0.97          | 0.81          | 1.08          | 0.75            | 0.95         | 0.75           | 0.81           |
| 611             | 0.95            | 1.14          | 0.89          | 1.16          | 1.17            | 1.00        | 1.17          | 0.71          | 1.37          | 1.02            | 1.04         | 1.02           | 0.79           |
| 613             | 1.24            | 1.18          | 1.04          | 1.44          | 1.14            | 1.17        | 1.23          | 0.87          | 1.79          | 1.06            | 0.95         | 1.04           | 0.84           |
| 618             | 1.30            | 0.89          | 1.09          | 0.60          | 1.05            | 1.19        | 1.17          | 1.07          | 1.15          | 1.23            | 0.92         | 1.31           | 0.98           |
| 619             | 1.27            | 0.92          | 1.08          | 0.60          | 1.06            | 1.27        | 1.33          | 1.01          | 1.11          | 1.02            | 1.00         | 1.45           | 0.94           |
| 620             | 1.82            | 0.95          | 1.11          | 0.88          | 0.58            | 1.19        | 1.27          | 1.22          | 1.73          | 0.75            | 0.65         | 1.34           | 1.10           |
| 621             | 1.40            | 1.07          | 1.17          | 1.01          | 1.12            | 1.25        | 1.41          | 1.26          | 1.56          | 1.07            | 0.89         | 1.31           | 1.08           |
| 622             | 1.15            | 0.88          | 0.96          | 1.03          | 1.13            | 1.14        | 1.08          | 0.93          | 1.13          | 1.15            | 0.99         | 1.23           | 0.98           |
| 625             | 1.14            | 1.22          | 0.93          | 1.01          | 1.03            | 1.00        | 1.11          | 0.90          | 1.16          | 0.96            | 0.88         | 0.91           | 0.97           |
| 629             | 1.07            | 0.95          | 0.91          | 1.02          | 1.13            | 1.08        | 1.03          | 0.78          | 1.21          | 1.22            | 1.01         | 1.08           | 0.85           |
| 630             | 1.31            | 1.44          | 0.53          | 0.78          | 0.60            | 0.96        | 1.00          | 0.54          | 1.58          | 1.21            | 0.73         | 0.70           | 1.02           |
| 631             | 1.02            | 0.96          | 1.00          | 1.15          | 1.13            | 1.03        | 0.99          | 0.74          | 1.36          | 1.07            | 1.01         | 1.04           | 0.73           |
| 632             | 1.06            | 1.01          | 1.20          | 1.12          | 1.16            | 1.16        | 0.95          | 0.79          | 1.33          | 1.24            | 1.09         | 0.94           | 0.66           |
| 633             | 1.04            | 1.45          | 1.43          | 1.11          | 0.90            | 0.96        | 1.02          | 0.87          | 1.17          | 0.90            | 0.92         | 0.70           | 0.61           |
| 635             | 1.10            | 1.03          | 1.03          | 1.07          | 1.17            | 1.13        | 1.04          | 0.76          | 1.51          | 1.14            | 1.02         | 1.01           | 0.74           |
| 636             | 1.21            | 1.13          | 1.00          | 1.04          | 1.06            | 1.21        | 0.98          | 0.73          | 1.32          | 0.99            | 1.00         | 0.86           | 0.73           |
| 637             | 1.15            | 1.00          | 1.17          | 1.11          | 1.20            | 1.25        | 1.00          | 0.83          | 1.40          | 1.23            | 1.09         | 1.00           | 0.71           |
| 639             | 1.25            | 1.23          | 1.35          | 1.32          | 0.84            | 1.08        | 0.91          | 1.10          | 1.10          | 0.93            | 0.86         | 0.74           | 0.81           |
| 641             | 1.56            | 0.54          | 1.31          | 1.64          | 1.28            | 1.41        | 0.53          | 0.78          | 0.82          | 1.54            | 0.90         | 0.98           | 0.60           |
| 655             | 1.10            | 1.19          | 1.12          | 1.28          | 1.17            | 1.02        | 0.98          | 0.73          | 1.46          | 1.22            | 0.93         | 0.82           | 0.65           |
| 658             | 1.89            | 0.95          | 1.35          | 1.07          | 0.88            | 1.94        | 0.47          | 1.12          | 1.30          | 1.43            | 1.02         | 0.50           | 0.83           |
| 659             | 1.17            | 0.97          | 1.05          | 1.41          | 1.17            | 1.35        | 0.97          | 0.77          | 1.58          | 1.12            | 1.15         | 1.01           | 0.73           |
| 665             | 1.31            | 0.77          | 1.43          | 1.48          | 0.49            | 1.83        | 0.84          | 1.70          | 1.88          | 0.49            | 1.40         | 1.09           | 1.19           |
| 670.01          | 0.98            | 1.09          | 0.80          | 0.91          | 1.03            | 0.94        | 0.98          | 0.75          | 0.92          | 1.06            | 0.95         | 0.90           | 0.94           |
| 672             | 0.97            | 0.89          | 0.94          | 0.94          | 1.00            | 0.93        | 0.75          | 0.66          | 0.87          | 1.15            | 0.96         | 0.84           | 0.70           |
| 706             | 0.99            | 0.76          | 1.82          | 1.29          | 1.23            | 1.06        | 0.73          | 0.70          | 1.32          | 2.05            | 1.07         | 0.96           | 0.38           |
| 714             | 2.37            | 1.65          | 1.96          | 1.67          | 1.13            | 1.03        | 1.17          | 0.94          | 1.20          | 1.20            | 0.44         | 0.71           | 0.48           |
| 721             | 1.12            | 0.80          | 0.95          | 0.96          | 1.36            | 1.07        | 0.80          | 0.86          | 0.92          | 1.07            | 0.96         | 0.99           | 0.90           |
| 735             | 1.02            | 1.07          | 2.07          | 1.11          | 1.39            | 0.62        | 0.62          | 3.38          | 0.51          | 1.17            | 0.61         | 0.58           | 1.64           |

| PATHWAY<br>SORT | ANVOA Contrasts |               |               |               | ANVOA Contrasts |             |               |               |               | ANVOA Contrasts |              |                |                |
|-----------------|-----------------|---------------|---------------|---------------|-----------------|-------------|---------------|---------------|---------------|-----------------|--------------|----------------|----------------|
|                 | T1-7<br>C-7     | T1-14<br>C-14 | T1-21<br>C-21 | T1-28<br>C-28 | T2-0<br>C-0     | T2-7<br>C-7 | T2-14<br>C-14 | T2-21<br>C-21 | T2-28<br>C-28 | T2-0<br>T1-0    | T2-7<br>T1-7 | T2-14<br>T1-14 | T2-21<br>T1-21 |
| 742             | 0.94            | 1.03          | 1.01          | 1.13          | 0.88            | 0.92        | 0.90          | 0.68          | 1.23          | 0.98            | 0.97         | 0.88           | 0.68           |
| 744             | 1.01            | 0.98          | 0.91          | 0.99          | 1.09            | 1.27        | 1.11          | 0.72          | 1.41          | 1.07            | 1.26         | 1.12           | 0.80           |
| 809             | 1.00            | 0.84          | 0.93          | 0.84          | 1.18            | 1.07        | 1.03          | 0.92          | 1.06          | 1.21            | 1.07         | 1.23           | 0.99           |
| 811             | 1.08            | 1.00          | 1.49          | 0.69          | 0.86            | 0.87        | 2.70          | 0.83          | 0.70          | 0.62            | 0.80         | 2.70           | 0.56           |
| 819             | 1.18            | 1.10          | 1.03          | 1.09          | 1.17            | 1.12        | 1.19          | 0.83          | 1.08          | 1.14            | 0.95         | 1.08           | 0.80           |
| 820             | 1.18            | 1.10          | 1.13          | 1.18          | 1.13            | 1.10        | 1.06          | 0.99          | 1.15          | 1.06            | 0.93         | 0.96           | 0.87           |
| 821             | 1.10            | 0.99          | 1.04          | 1.02          | 1.22            | 1.05        | 1.01          | 0.91          | 1.07          | 1.16            | 0.95         | 1.01           | 0.88           |
| 822             | 1.15            | 0.97          | 0.97          | 0.95          | 1.14            | 1.05        | 1.02          | 0.86          | 1.04          | 1.19            | 0.91         | 1.05           | 0.89           |
| 823             | 0.99            | 1.02          | 1.30          | 1.04          | 0.92            | 0.83        | 1.19          | 0.73          | 1.08          | 1.28            | 0.84         | 1.16           | 0.56           |
| 825             | 1.04            | 1.08          | 1.15          | 1.04          | 1.24            | 1.18        | 1.16          | 0.97          | 1.03          | 1.38            | 1.13         | 1.07           | 0.85           |
| 833             | 4.50            | 3.93          | 4.57          | 0.66          | 5.22            | 1.59        | 1.63          | 1.47          | 0.24          | 1.06            | 0.35         | 0.41           | 0.32           |
| 834             | 7.21            | 4.31          | 5.17          | 0.83          | 2.94            | 2.50        | 1.80          | 1.71          | 0.31          | 1.26            | 0.35         | 0.42           | 0.33           |
| 835             | 6.99            | 4.80          | 5.68          | 0.76          | 4.00            | 2.41        | 1.72          | 1.46          | 0.27          | 1.18            | 0.34         | 0.36           | 0.26           |
| 840             | 1.02            | 0.98          | 0.98          | 1.43          | 1.03            | 0.92        | 1.09          | 1.06          | 1.36          | 1.12            | 0.90         | 1.11           | 1.07           |
| 849             | 1.29            | 1.21          | 1.34          | 1.12          | 1.26            | 1.53        | 0.95          | 1.30          | 1.16          | 1.48            | 1.18         | 0.78           | 0.97           |
| 851             | 1.14            | 1.02          | 1.06          | 1.35          | 1.22            | 1.07        | 0.93          | 0.96          | 1.25          | 1.55            | 0.94         | 0.91           | 0.90           |
| 876             | 1.37            | 0.98          | 2.19          | 1.20          | 1.04            | 1.42        | 1.21          | 1.61          | 0.63          | 1.18            | 1.03         | 1.24           | 0.74           |
| 877             | 0.99            | 0.77          | 1.57          | 0.92          | 1.68            | 1.37        | 1.18          | 1.35          | 1.39          | 0.74            | 1.38         | 1.53           | 0.86           |
| 881             | 1.19            | 1.04          | 1.09          | 1.15          | 1.01            | 1.10        | 0.91          | 0.89          | 1.08          | 0.99            | 0.93         | 0.87           | 0.82           |
| 882             | 4.54            | 2.07          | 1.52          | 1.22          | 0.98            | 0.95        | 0.83          | 0.87          | 1.17          | 0.38            | 0.21         | 0.40           | 0.57           |
| 883             | 0.96            | 0.99          | 1.11          | 1.12          | 1.04            | 1.00        | 0.94          | 0.91          | 0.99          | 1.16            | 1.04         | 0.95           | 0.82           |
| 890             | 1.15            | 0.89          | 1.25          | 1.16          | 0.88            | 1.03        | 1.00          | 1.13          | 0.91          | 0.91            | 0.89         | 1.12           | 0.91           |
| 905             | 1.36            | 0.77          | 1.14          | 1.01          | 0.94            | 1.04        | 0.84          | 0.84          | 0.98          | 1.05            | 0.77         | 1.09           | 0.74           |
| 909             | 0.92            | 0.58          | 1.66          | 0.79          | 0.99            | 1.01        | 0.70          | 0.96          | 1.31          | 2.25            | 1.10         | 1.20           | 0.58           |
| 915             | 0.82            | 0.59          | 0.96          | 1.15          | 1.39            | 1.39        | 0.60          | 0.60          | 1.07          | 2.23            | 1.69         | 1.02           | 0.63           |
| 919             | 0.82            | 0.83          | 1.15          | 1.02          | 1.15            | 1.18        | 0.87          | 0.98          | 1.36          | 2.17            | 1.43         | 1.05           | 0.85           |
| 920             | 4.29            | 4.11          | 2.97          | 0.97          | 2.62            | 1.85        | 1.48          | 1.56          | 0.48          | 0.90            | 0.43         | 0.36           | 0.52           |
| 922             | 6.92            | 3.72          | 3.33          | 0.88          | 1.83            | 2.14        | 1.07          | 1.32          | 0.49          | 0.68            | 0.31         | 0.29           | 0.40           |
| 923             | 4.25            | 3.49          | 3.59          | 1.02          | 2.34            | 1.33        | 1.11          | 1.31          | 0.39          | 1.12            | 0.31         | 0.32           | 0.36           |
| 926             | 1.60            | 2.54          | 3.28          | 1.32          | 1.00            | 1.31        | 0.86          | 1.72          | 0.39          | 1.00            | 0.82         | 0.34           | 0.52           |
| 929             | 6.38            | 2.35          | 2.92          | 0.87          | 3.81            | 2.14        | 0.63          | 1.09          | 0.60          | 1.38            | 0.34         | 0.27           | 0.37           |
| 930             | 3.92            | 3.69          | 3.18          | 0.97          | 2.15            | 1.65        | 0.99          | 1.69          | 0.42          | 2.04            | 0.42         | 0.27           | 0.53           |
| 934             | 5.63            | 3.63          | 3.51          | 0.93          | 3.77            | 2.01        | 0.85          | 1.38          | 0.42          | 1.61            | 0.36         | 0.23           | 0.39           |
| 935             | 4.47            | 2.75          | 2.87          | 0.85          | 2.51            | 2.61        | 0.74          | 1.91          | 0.47          | 2.51            | 0.58         | 0.27           | 0.67           |
| 936             | 8.51            | 2.99          | 4.20          | 0.79          | 3.92            | 2.52        | 0.70          | 1.23          | 0.44          | 1.69            | 0.30         | 0.23           | 0.29           |
| 937             | 4.35            | 2.54          | 3.47          | 0.84          | 1.83            | 2.15        | 0.95          | 1.24          | 0.40          | 1.10            | 0.49         | 0.38           | 0.36           |
| 938             | 0.91            | 0.85          | 1.38          | 1.09          | 1.21            | 1.09        | 0.77          | 0.78          | 1.45          | 1.62            | 1.20         | 0.91           | 0.57           |
| 939             | 2.54            | 3.97          | 2.24          | 0.83          | 1.00            | 1.62        | 1.15          | 1.25          | 0.34          | 1.00            | 0.64         | 0.29           | 0.56           |

| PATHWAY<br>SORT | ANVOA Contrasts |               |               |               | ANVOA Contrasts |             |               |               |               | ANVOA Contrasts |              |                |                |
|-----------------|-----------------|---------------|---------------|---------------|-----------------|-------------|---------------|---------------|---------------|-----------------|--------------|----------------|----------------|
|                 | T1-7<br>C-7     | T1-14<br>C-14 | T1-21<br>C-21 | T1-28<br>C-28 | T2-0<br>C-0     | T2-7<br>C-7 | T2-14<br>C-14 | T2-21<br>C-21 | T2-28<br>C-28 | T2-0<br>T1-0    | T2-7<br>T1-7 | T2-14<br>T1-14 | T2-21<br>T1-21 |
| 945             | 4.42            | 4.94          | 3.93          | 1.12          | 1.05            | 1.87        | 1.37          | 1.83          | 0.29          | 0.59            | 0.42         | 0.28           | 0.47           |
| 970             | 0.77            | 1.21          | 1.06          | 0.96          | 0.90            | 0.57        | 0.96          | 1.06          | 1.30          | 1.09            | 0.74         | 0.80           | 1.00           |
| 1004            | 1.15            | 0.86          | 1.33          | 1.10          | 0.98            | 1.07        | 0.93          | 1.10          | 1.01          | 1.15            | 0.92         | 1.08           | 0.83           |
| 1005            | 1.25            | 0.98          | 1.19          | 1.10          | 1.09            | 1.00        | 0.96          | 0.92          | 1.05          | 1.19            | 0.80         | 0.98           | 0.78           |
| 1018            | 1.18            | 0.93          | 1.22          | 1.33          | 0.82            | 1.10        | 1.19          | 1.14          | 0.97          | 1.16            | 0.93         | 1.28           | 0.93           |
| 1020            | 1.08            | 0.86          | 1.29          | 1.17          | 0.98            | 1.04        | 0.91          | 1.08          | 1.03          | 1.04            | 0.96         | 1.06           | 0.84           |
| 1024            | 1.35            | 0.80          | 1.96          | 2.51          | 2.07            | 1.15        | 0.89          | 1.38          | 2.12          | 1.72            | 0.86         | 1.12           | 0.70           |
| 1034            | 1.13            | 0.73          | 1.23          | 1.08          | 1.50            | 0.95        | 1.09          | 1.17          | 1.04          | 1.20            | 0.84         | 1.48           | 0.95           |
| 1057            | 0.80            | 1.01          | 1.40          | 1.64          | 1.88            | 0.39        | 0.28          | 1.09          | 1.31          | 1.27            | 0.48         | 0.28           | 0.78           |
| 1059            | 0.98            | 0.78          | 1.49          | 1.01          | 1.37            | 1.07        | 1.21          | 0.89          | 0.40          | 1.33            | 1.09         | 1.55           | 0.60           |
| 1098            | 59.92           | 16.58         | 8.61          | 3.60          | 0.75            | 0.77        | 0.95          | 1.25          | 1.20          | 0.82            | 0.01         | 0.06           | 0.15           |
| 1101            | 0.82            | 0.79          | 2.13          | 2.13          | 1.12            | 1.05        | 0.88          | 1.07          | 1.35          | 1.01            | 1.29         | 1.11           | 0.50           |
| 1105            | 1.21            | 1.14          | 1.08          | 0.77          | 1.06            | 0.93        | 0.75          | 0.59          | 0.54          | 1.13            | 0.77         | 0.66           | 0.54           |
| 1106            | 2.26            | 1.32          | 1.37          | 1.82          | 0.46            | 0.98        | 0.48          | 0.69          | 1.43          | 0.72            | 0.43         | 0.36           | 0.51           |
| 1114            | 1.14            | 0.46          | 0.81          | 0.83          | 1.20            | 1.31        | 0.82          | 0.69          | 1.22          | 1.01            | 1.15         | 1.80           | 0.85           |
| 1116            | 0.86            | 0.57          | 0.77          | 0.72          | 1.22            | 1.14        | 0.81          | 0.86          | 1.33          | 1.15            | 1.32         | 1.41           | 1.13           |
| 1128            | 1.42            | 1.06          | 1.30          | 0.78          | 1.42            | 1.16        | 1.06          | 0.76          | 0.99          | 1.19            | 0.82         | 1.00           | 0.59           |
| 1149            | 1.15            | 0.79          | 1.02          | 1.01          | 1.09            | 1.10        | 0.92          | 0.86          | 1.24          | 1.13            | 0.96         | 1.18           | 0.85           |
| 1150            | 0.89            | 1.13          | 0.89          | 0.70          | 1.50            | 0.92        | 1.88          | 0.62          | 1.04          | 2.41            | 1.04         | 1.67           | 0.69           |
| 1180            | 1.55            | 1.36          | 1.13          | 1.42          | 1.00            | 1.05        | 1.07          | 0.92          | 1.38          | 0.86            | 0.68         | 0.78           | 0.81           |
| 1181            | 1.05            | 1.24          | 0.95          | 0.96          | 1.19            | 1.42        | 1.08          | 0.67          | 0.98          | 1.88            | 1.36         | 0.87           | 0.70           |
| 1199            | 1.24            | 1.03          | 1.49          | 1.46          | 1.00            | 1.17        | 1.01          | 1.03          | 1.21          | 1.20            | 0.94         | 0.99           | 0.69           |
| 1202            | 1.12            | 0.78          | 1.47          | 0.76          | 1.07            | 0.98        | 0.71          | 0.99          | 0.95          | 0.96            | 0.88         | 0.91           | 0.67           |
| 1212            | 4.95            | 5.83          | 3.95          | 0.96          | 4.28            | 1.71        | 1.72          | 2.29          | 0.32          | 1.15            | 0.35         | 0.30           | 0.58           |
| 1216            | 2.48            | 4.30          | 2.84          | 1.51          | 1.21            | 1.00        | 2.22          | 1.65          | 1.03          | 1.22            | 0.40         | 0.52           | 0.58           |
| 1221            | 1.35            | 0.88          | 0.87          | 1.16          | 0.93            | 1.09        | 0.91          | 0.82          | 1.07          | 1.06            | 0.81         | 1.03           | 0.94           |
| 1224            | 2.24            | 0.99          | 0.87          | 0.62          | 1.18            | 1.03        | 1.78          | 2.03          | 0.81          | 0.55            | 0.46         | 1.80           | 2.33           |
| 1232            | 1.27            | 1.14          | 1.08          | 0.99          | 1.18            | 1.04        | 1.03          | 0.89          | 0.99          | 1.09            | 0.82         | 0.91           | 0.82           |
| 1242            | 1.17            | 1.05          | 1.08          | 1.06          | 1.03            | 1.11        | 1.02          | 0.90          | 1.01          | 1.05            | 0.94         | 0.97           | 0.83           |



| PATHWAY<br>SORT | ANVOA Contrasts |               |               |               | ANVOA Contrasts |             |               |               |               | ANVOA Contrasts |              |                |                |
|-----------------|-----------------|---------------|---------------|---------------|-----------------|-------------|---------------|---------------|---------------|-----------------|--------------|----------------|----------------|
|                 | T1-7<br>C-7     | T1-14<br>C-14 | T1-21<br>C-21 | T1-28<br>C-28 | T2-0<br>C-0     | T2-7<br>C-7 | T2-14<br>C-14 | T2-21<br>C-21 | T2-28<br>C-28 | T2-0<br>T1-0    | T2-7<br>T1-7 | T2-14<br>T1-14 | T2-21<br>T1-21 |
| 1242.1          | 0.85            | 1.24          | 1.09          | 1.07          | 1.16            | 0.88        | 1.18          | 1.18          | 0.98          | 1.02            | 1.04         | 0.95           | 1.08           |
| 1243            | 1.22            | 0.99          | 0.88          | 1.13          | 1.04            | 1.14        | 0.94          | 0.74          | 0.95          | 1.05            | 0.93         | 0.95           | 0.84           |
| 1266            | 0.81            | 0.82          | 1.60          | 1.22          | 0.89            | 0.99        | 0.85          | 1.26          | 1.02          | 1.27            | 1.22         | 1.04           | 0.79           |
| 1288            | 0.99            | 1.03          | 1.09          | 1.11          | 1.21            | 0.88        | 0.97          | 0.85          | 1.07          | 1.21            | 0.88         | 0.94           | 0.78           |
| 1300            | 1.10            | 0.99          | 1.06          | 1.12          | 1.13            | 1.03        | 1.02          | 0.89          | 1.04          | 1.11            | 0.94         | 1.02           | 0.84           |
| 1318            | 1.02            | 0.76          | 1.24          | 1.11          | 0.95            | 1.00        | 0.92          | 1.01          | 0.91          | 1.09            | 0.98         | 1.20           | 0.81           |
| 1360            | 1.17            | 0.85          | 0.85          | 0.73          | 0.94            | 1.02        | 1.00          | 0.60          | 0.88          | 1.06            | 0.87         | 1.17           | 0.70           |
| 1469            | 1.13            | 0.93          | 1.11          | 0.94          | 1.06            | 1.08        | 0.91          | 0.88          | 1.00          | 1.09            | 0.96         | 0.97           | 0.79           |
| 1531            | 1.24            | 0.85          | 1.58          | 1.01          | 1.12            | 1.31        | 0.71          | 1.10          | 0.91          | 1.46            | 1.06         | 0.84           | 0.70           |
| 1565            | 1.09            | 0.92          | 1.03          | 1.10          | 1.10            | 1.12        | 0.98          | 0.84          | 1.18          | 1.27            | 1.02         | 1.07           | 0.82           |
| 1584            | 1.08            | 1.03          | 1.09          | 1.17          | 0.98            | 1.09        | 1.04          | 0.92          | 1.16          | 1.09            | 1.01         | 1.00           | 0.85           |
| 1585            | 0.94            | 1.12          | 1.23          | 1.23          | 1.06            | 1.15        | 1.05          | 1.15          | 0.88          | 1.02            | 1.23         | 0.94           | 0.93           |
| 1612            | 1.07            | 0.99          | 1.12          | 1.15          | 1.15            | 1.05        | 1.03          | 0.95          | 1.04          | 1.23            | 0.98         | 1.04           | 0.85           |
| 1613            | 1.06            | 1.16          | 1.08          | 1.18          | 1.06            | 0.97        | 1.10          | 1.08          | 1.02          | 1.03            | 0.91         | 0.94           | 1.00           |
| 1614            | 0.99            | 0.81          | 0.98          | 0.96          | 1.08            | 0.92        | 1.39          | 0.80          | 1.01          | 1.11            | 0.94         | 1.72           | 0.82           |
| 1615            | 0.91            | 1.18          | 0.53          | 1.14          | 1.07            | 1.17        | 0.79          | 0.62          | 1.16          | 1.19            | 1.30         | 0.67           | 1.18           |
| 1632            | 1.41            | 1.44          | 2.34          | 2.17          | 0.98            | 1.07        | 0.96          | 1.02          | 0.95          | 0.99            | 0.76         | 0.67           | 0.44           |
| 1662            | 1.11            | 1.09          | 1.20          | 0.99          | 0.99            | 0.89        | 1.13          | 1.01          | 1.12          | 1.18            | 0.80         | 1.04           | 0.84           |

| PATHWAY<br>SORT | ANVOA Contrasts |            |             |             |             |             |              |              | ANVOA Contrasts |               |               |               |               |
|-----------------|-----------------|------------|-------------|-------------|-------------|-------------|--------------|--------------|-----------------|---------------|---------------|---------------|---------------|
|                 | T2-28<br>T1-28  | C-7<br>C-0 | C-14<br>C-0 | C-21<br>C-0 | C-28<br>C-0 | C-14<br>C-7 | C-21<br>C-14 | C-28<br>C-21 | T1-7<br>T1-0    | T1-14<br>T1-0 | T1-21<br>T1-0 | T1-28<br>T1-0 | T1-14<br>T1-7 |
| 1               | 1.19            | 1.21       | 1.74        | 1.81        | 1.98        | 1.44        | 1.04         | 1.10         | 1.36            | 1.40          | 1.93          | 2.14          | 1.03          |
| 3               | 1.15            | 1.06       | 1.01        | 1.05        | 1.23        | 0.95        | 1.04         | 1.17         | 1.20            | 1.39          | 1.04          | 1.29          | 1.16          |
| 4               | 0.81            | 0.94       | 0.85        | 0.81        | 0.68        | 0.90        | 0.95         | 0.85         | 1.29            | 0.97          | 1.20          | 1.10          | 0.75          |
| 7               | 1.09            | 0.88       | 1.04        | 0.79        | 0.87        | 1.17        | 0.77         | 1.10         | 1.22            | 1.13          | 1.10          | 1.09          | 0.93          |
| 8               | 0.82            | 1.02       | 1.26        | 1.06        | 1.16        | 1.23        | 0.84         | 1.10         | 1.28            | 1.27          | 1.50          | 1.49          | 0.99          |
| 17              | 0.90            | 0.93       | 1.04        | 1.19        | 1.20        | 1.12        | 1.14         | 1.01         | 1.18            | 1.31          | 1.24          | 1.34          | 1.11          |
| 22              | 0.85            | 1.03       | 1.07        | 1.09        | 1.09        | 1.04        | 1.02         | 1.00         | 1.16            | 1.14          | 1.17          | 1.21          | 0.98          |
| 24              | 0.81            | 1.00       | 1.15        | 1.08        | 1.20        | 1.16        | 0.94         | 1.11         | 1.26            | 1.29          | 1.52          | 1.19          | 1.02          |
| 25              | 0.73            | 0.90       | 1.00        | 0.75        | 0.82        | 1.11        | 0.75         | 1.10         | 1.08            | 0.91          | 0.99          | 0.96          | 0.84          |
| 26              | 0.44            | 0.68       | 0.77        | 0.46        | 1.01        | 1.13        | 0.59         | 2.20         | 1.09            | 1.10          | 1.18          | 1.39          | 1.01          |
| 27              | 1.09            | 1.07       | 1.34        | 1.13        | 1.20        | 1.25        | 0.84         | 1.06         | 1.21            | 1.15          | 1.41          | 1.37          | 0.95          |
| 39              | 1.13            | 0.84       | 1.01        | 0.81        | 0.84        | 1.20        | 0.80         | 1.04         | 1.09            | 0.89          | 0.91          | 0.89          | 0.82          |
| 44              | 1.18            | 0.91       | 0.76        | 0.69        | 0.64        | 0.84        | 0.91         | 0.93         | 0.81            | 0.65          | 0.54          | 0.53          | 0.80          |
| 45              | 0.98            | 1.18       | 1.02        | 0.98        | 1.14        | 0.87        | 0.96         | 1.16         | 1.20            | 1.11          | 1.13          | 1.18          | 0.92          |
| 50              | 0.88            | 1.10       | 1.10        | 1.10        | 1.03        | 1.00        | 1.00         | 0.94         | 0.85            | 0.82          | 1.20          | 1.01          | 0.97          |
| 69              | 0.62            | 1.01       | 1.53        | 0.80        | 0.97        | 1.51        | 0.53         | 1.21         | 1.18            | 1.31          | 1.39          | 1.50          | 1.11          |
| 74              | 1.01            | 1.05       | 0.99        | 1.05        | 1.07        | 0.95        | 1.06         | 1.01         | 1.26            | 1.23          | 1.17          | 1.17          | 0.97          |
| 75              | 0.86            | 1.50       | 1.10        | 1.19        | 1.09        | 0.74        | 1.08         | 0.91         | 1.07            | 0.94          | 0.98          | 1.06          | 0.88          |
| 80              | 1.20            | 1.11       | 1.07        | 1.43        | 1.44        | 0.96        | 1.34         | 1.01         | 0.92            | 1.43          | 1.38          | 0.94          | 1.55          |
| 83              | 0.89            | 1.20       | 1.24        | 1.29        | 1.33        | 1.03        | 1.04         | 1.03         | 1.33            | 1.31          | 1.31          | 1.40          | 0.99          |
| 88              | 0.98            | 0.99       | 1.08        | 1.05        | 0.97        | 1.09        | 0.97         | 0.92         | 1.14            | 1.09          | 1.28          | 1.10          | 0.95          |
| 99              | 0.94            | 1.09       | 1.15        | 1.16        | 1.18        | 1.05        | 1.00         | 1.02         | 1.24            | 1.21          | 1.18          | 1.28          | 0.98          |
| 128             | 1.12            | 1.09       | 1.21        | 1.22        | 1.15        | 1.11        | 1.01         | 0.94         | 1.23            | 1.11          | 1.24          | 1.00          | 0.90          |
| 135             | 0.93            | 0.90       | 1.13        | 1.16        | 0.89        | 1.25        | 1.03         | 0.77         | 1.09            | 1.02          | 1.02          | 1.03          | 0.94          |
| 144             | 0.89            | 0.96       | 0.94        | 1.05        | 0.96        | 0.97        | 1.12         | 0.92         | 1.08            | 1.10          | 0.89          | 0.88          | 1.01          |
| 145             | 0.89            | 1.06       | 1.17        | 1.16        | 1.17        | 1.10        | 0.99         | 1.02         | 1.30            | 1.28          | 1.27          | 1.33          | 0.98          |
| 151             | 0.95            | 0.99       | 1.03        | 1.01        | 0.98        | 1.05        | 0.98         | 0.97         | 1.19            | 1.09          | 1.19          | 1.24          | 0.92          |
| 164             | 0.93            | 1.16       | 1.06        | 1.12        | 1.25        | 0.91        | 1.06         | 1.12         | 1.04            | 1.03          | 1.07          | 1.10          | 0.99          |
| 170             | 1.20            | 1.15       | 1.15        | 1.00        | 1.13        | 1.00        | 0.88         | 1.12         | 1.18            | 1.26          | 1.44          | 1.14          | 1.06          |
| 172             | 3.57            | 0.88       | 1.02        | 1.07        | 0.74        | 1.17        | 1.04         | 0.70         | 0.42            | 0.31          | 0.45          | 0.47          | 0.73          |
| 173             | 3.01            | 1.19       | 1.45        | 1.43        | 1.20        | 1.22        | 0.99         | 0.84         | 0.71            | 0.39          | 0.43          | 0.50          | 0.55          |
| 179             | 1.02            | 1.00       | 1.91        | 3.10        | 4.15        | 1.91        | 1.62         | 1.34         | 2.80            | 4.20          | 4.40          | 4.95          | 1.50          |
| 180             | 0.79            | 1.14       | 1.15        | 1.13        | 1.18        | 1.01        | 0.98         | 1.05         | 1.44            | 1.45          | 1.47          | 1.47          | 1.01          |
| 181             | 0.88            | 1.09       | 1.17        | 1.15        | 1.22        | 1.08        | 0.98         | 1.07         | 1.45            | 1.46          | 1.59          | 1.54          | 1.00          |
| 190             | 0.93            | 1.07       | 1.14        | 1.15        | 1.17        | 1.07        | 1.01         | 1.02         | 1.21            | 1.17          | 1.20          | 1.23          | 0.96          |
| 193             | 2.91            | 1.18       | 1.36        | 1.29        | 0.99        | 1.16        | 0.94         | 0.77         | 0.62            | 0.31          | 0.44          | 0.48          | 0.49          |
| 198             | 0.44            | 1.01       | 1.47        | 1.77        | 2.20        | 1.45        | 1.20         | 1.25         | 2.66            | 3.17          | 4.00          | 3.94          | 1.19          |
| 200             | 1.04            | 1.00       | 0.87        | 0.95        | 0.90        | 0.87        | 1.09         | 0.94         | 0.96            | 0.82          | 0.94          | 0.84          | 0.85          |
| 202             | 1.27            | 0.98       | 0.93        | 1.00        | 0.77        | 0.95        | 1.07         | 0.77         | 0.93            | 0.62          | 0.97          | 0.85          | 0.67          |
| 205             | 1.05            | 0.97       | 1.14        | 1.06        | 0.98        | 1.17        | 0.93         | 0.92         | 1.15            | 1.07          | 1.12          | 1.13          | 0.93          |
| 206             | 0.99            | 1.10       | 1.12        | 1.09        | 1.04        | 1.01        | 0.98         | 0.95         | 1.22            | 1.13          | 1.17          | 1.16          | 0.93          |

| PATHWAY<br>SORT | ANVOA Contrasts |            |             |             |             |             |              |              | ANVOA Contrasts |               |               |               |               |
|-----------------|-----------------|------------|-------------|-------------|-------------|-------------|--------------|--------------|-----------------|---------------|---------------|---------------|---------------|
|                 | T2-28<br>T1-28  | C-7<br>C-0 | C-14<br>C-0 | C-21<br>C-0 | C-28<br>C-0 | C-14<br>C-7 | C-21<br>C-14 | C-28<br>C-21 | T1-7<br>T1-0    | T1-14<br>T1-0 | T1-21<br>T1-0 | T1-28<br>T1-0 | T1-14<br>T1-7 |
| 213             | 1.28            | 1.33       | 1.84        | 2.04        | 2.48        | 1.38        | 1.11         | 1.22         | 1.11            | 1.69          | 3.12          | 2.75          | 1.52          |
| 216             | 0.92            | 1.26       | 1.50        | 1.13        | 1.13        | 1.19        | 0.75         | 1.01         | 1.23            | 1.51          | 1.94          | 1.50          | 1.23          |
| 224             | 1.09            | 1.62       | 1.81        | 2.07        | 1.89        | 1.11        | 1.14         | 0.92         | 1.65            | 1.69          | 1.64          | 1.89          | 1.02          |
| 225             | 0.96            | 0.98       | 0.71        | 0.61        | 0.51        | 0.72        | 0.86         | 0.83         | 0.92            | 0.70          | 0.57          | 0.53          | 0.77          |
| 227             | 1.04            | 0.83       | 1.01        | 1.02        | 1.02        | 1.22        | 1.01         | 1.00         | 1.23            | 0.89          | 1.26          | 1.11          | 0.72          |
| 229             | 0.93            | 0.99       | 1.14        | 0.98        | 1.06        | 1.15        | 0.85         | 1.08         | 1.09            | 1.05          | 1.18          | 1.01          | 0.96          |
| 231             | 0.61            | 1.53       | 2.33        | 2.63        | 2.91        | 1.52        | 1.13         | 1.11         | 1.62            | 3.95          | 5.57          | 4.98          | 2.44          |
| 241             | 1.44            | 1.72       | 2.11        | 2.92        | 1.60        | 1.23        | 1.38         | 0.55         | 1.42            | 1.34          | 1.75          | 1.79          | 0.95          |
| 244             | 0.71            | 0.96       | 1.09        | 0.80        | 1.02        | 1.14        | 0.73         | 1.29         | 1.21            | 1.23          | 1.41          | 1.34          | 1.02          |
| 245             | 0.90            | 0.95       | 1.08        | 0.97        | 1.03        | 1.14        | 0.89         | 1.07         | 1.20            | 1.11          | 1.34          | 1.24          | 0.92          |
| 246             | 1.00            | 1.05       | 1.14        | 1.16        | 1.12        | 1.08        | 1.02         | 0.97         | 1.17            | 1.14          | 1.35          | 1.31          | 0.98          |
| 248             | 0.88            | 1.07       | 1.17        | 1.16        | 1.18        | 1.10        | 0.99         | 1.02         | 1.02            | 1.04          | 1.10          | 1.18          | 1.02          |
| 252             | 0.90            | 1.18       | 1.15        | 1.17        | 1.13        | 0.98        | 1.01         | 0.97         | 1.28            | 1.39          | 1.18          | 1.23          | 1.08          |
| 259             | 0.95            | 1.04       | 1.08        | 1.08        | 1.05        | 1.04        | 1.00         | 0.97         | 1.15            | 1.11          | 1.16          | 1.14          | 0.96          |
| 260             | 0.83            | 0.74       | 0.95        | 1.04        | 1.02        | 1.28        | 1.10         | 0.97         | 0.93            | 1.13          | 1.15          | 1.21          | 1.22          |
| 263             | 0.85            | 0.96       | 1.17        | 0.93        | 1.02        | 1.21        | 0.80         | 1.10         | 1.20            | 1.24          | 1.38          | 1.38          | 1.03          |
| 266             | 0.92            | 2.10       | 2.68        | 2.58        | 2.67        | 1.28        | 0.96         | 1.04         | 2.94            | 3.49          | 3.08          | 2.88          | 1.19          |
| 270             | 1.04            | 1.10       | 1.22        | 1.30        | 1.28        | 1.11        | 1.07         | 0.98         | 1.20            | 1.17          | 1.28          | 1.29          | 0.98          |
| 280             | 0.97            | 0.94       | 1.04        | 0.96        | 0.88        | 1.11        | 0.92         | 0.92         | 0.91            | 0.97          | 0.81          | 0.78          | 1.06          |
| 281             | 1.16            | 1.17       | 1.03        | 1.12        | 1.40        | 0.88        | 1.09         | 1.25         | 1.38            | 1.35          | 1.02          | 0.73          | 0.98          |
| 282             | 1.15            | 3.30       | 5.54        | 7.26        | 8.56        | 1.68        | 1.31         | 1.18         | 4.69            | 6.52          | 8.93          | 8.91          | 1.39          |
| 283             | 1.11            | 0.92       | 0.76        | 0.68        | 0.70        | 0.82        | 0.91         | 1.02         | 0.84            | 0.65          | 0.58          | 0.51          | 0.77          |
| 285             | 1.00            | 0.25       | 0.15        | 0.09        | 0.09        | 0.58        | 0.64         | 1.00         | 0.46            | 0.21          | 0.11          | 0.08          | 0.46          |
| 404             | 0.95            | 1.09       | 0.94        | 1.16        | 0.83        | 0.86        | 1.24         | 0.72         | 1.24            | 1.14          | 1.08          | 0.79          | 0.92          |
| 453             | 0.38            | 0.98       | 1.33        | 1.23        | 1.53        | 1.37        | 0.92         | 1.24         | 1.73            | 2.78          | 4.85          | 4.70          | 1.60          |
| 455             | 0.53            | 1.67       | 3.68        | 3.09        | 3.93        | 2.20        | 0.84         | 1.27         | 2.57            | 1.96          | 4.06          | 4.70          | 0.77          |
| 472             | 0.74            | 1.07       | 1.33        | 1.19        | 1.33        | 1.24        | 0.89         | 1.12         | 0.94            | 0.99          | 1.75          | 1.94          | 1.04          |
| 478             | 0.83            | 0.88       | 1.34        | 0.99        | 1.06        | 1.53        | 0.74         | 1.07         | 0.91            | 0.69          | 0.87          | 0.82          | 0.75          |
| 482             | 0.84            | 0.77       | 0.95        | 0.79        | 0.81        | 1.23        | 0.84         | 1.02         | 1.20            | 1.07          | 1.36          | 1.18          | 0.89          |
| 487             | 0.97            | 0.96       | 1.05        | 0.86        | 0.86        | 1.10        | 0.82         | 1.00         | 0.98            | 0.91          | 1.11          | 0.97          | 0.93          |
| 489             | 0.90            | 1.04       | 1.48        | 1.36        | 1.26        | 1.42        | 0.92         | 0.92         | 2.15            | 2.57          | 3.20          | 2.29          | 1.19          |
| 496             | 0.98            | 1.07       | 1.07        | 1.08        | 1.06        | 1.00        | 1.01         | 0.98         | 1.08            | 1.08          | 1.04          | 0.97          | 0.99          |
| 501             | 0.82            | 3.92       | 8.46        | 6.60        | 9.32        | 2.16        | 0.78         | 1.41         | 2.89            | 5.26          | 8.28          | 8.62          | 1.82          |

| PATHWAY<br>SORT | ANVOA Contrasts |            |             |             |             |             |              |              | ANVOA Contrasts |               |               |               |               |
|-----------------|-----------------|------------|-------------|-------------|-------------|-------------|--------------|--------------|-----------------|---------------|---------------|---------------|---------------|
|                 | T2-28<br>T1-28  | C-7<br>C-0 | C-14<br>C-0 | C-21<br>C-0 | C-28<br>C-0 | C-14<br>C-7 | C-21<br>C-14 | C-28<br>C-21 | T1-7<br>T1-0    | T1-14<br>T1-0 | T1-21<br>T1-0 | T1-28<br>T1-0 | T1-14<br>T1-7 |
| 515             | 0.99            | 0.99       | 1.27        | 0.97        | 1.07        | 1.28        | 0.77         | 1.10         | 1.15            | 0.96          | 1.57          | 1.02          | 0.84          |
| 517             | 0.12            | 1.90       | 2.91        | 2.72        | 3.54        | 1.54        | 0.93         | 1.30         | 6.24            | 11.39         | 15.34         | 17.06         | 1.83          |
| 519             | 1.05            | 1.10       | 1.49        | 1.30        | 1.27        | 1.35        | 0.87         | 0.98         | 1.01            | 4.50          | 7.99          | 6.65          | 4.46          |
| 521             | 1.02            | 0.95       | 1.04        | 0.91        | 0.92        | 1.09        | 0.88         | 1.01         | 1.11            | 1.00          | 1.10          | 1.05          | 0.91          |
| 523             | 0.85            | 0.65       | 0.87        | 0.63        | 0.77        | 1.33        | 0.72         | 1.22         | 1.57            | 1.58          | 1.28          | 1.28          | 1.01          |
| 524             | 1.02            | 1.01       | 1.42        | 1.19        | 1.05        | 1.40        | 0.84         | 0.88         | 1.86            | 2.96          | 2.30          | 2.24          | 1.59          |
| 527             | 1.74            | 1.03       | 1.09        | 1.09        | 0.88        | 1.06        | 1.00         | 0.81         | 2.24            | 0.38          | 0.18          | 0.14          | 0.17          |
| 529             | 0.64            | 0.63       | 0.61        | 0.37        | 0.34        | 0.97        | 0.61         | 0.91         | 0.81            | 0.64          | 0.32          | 0.21          | 0.78          |
| 531             | 0.39            | 0.32       | 1.57        | 0.20        | 0.24        | 4.94        | 0.13         | 1.21         | 1.71            | 0.33          | 0.04          | 0.02          | 0.19          |
| 532             | 0.84            | 0.92       | 1.08        | 0.86        | 1.03        | 1.17        | 0.79         | 1.21         | 0.87            | 1.13          | 1.30          | 1.13          | 1.30          |
| 533             | 0.10            | 0.46       | 0.12        | 0.03        | 0.03        | 0.26        | 0.28         | 1.01         | 1.13            | 0.82          | 0.47          | 0.12          | 0.72          |
| 534             | 0.45            | 0.56       | 0.24        | 0.14        | 0.10        | 0.43        | 0.59         | 0.72         | 0.82            | 0.59          | 0.33          | 0.13          | 0.72          |
| 535             | 0.16            | 0.83       | 0.78        | 0.42        | 0.35        | 0.94        | 0.54         | 0.83         | 1.17            | 1.98          | 35.49         | 66.45         | 1.69          |
| 536             | 0.65            | 2.86       | 5.40        | 5.99        | 6.99        | 1.89        | 1.11         | 1.17         | 3.46            | 4.82          | 6.72          | 7.12          | 1.39          |
| 545             | 1.33            | 0.59       | 0.42        | 0.37        | 0.24        | 0.72        | 0.88         | 0.66         | 1.37            | 1.90          | 1.96          | 0.81          | 1.39          |
| 546             | 0.58            | 0.83       | 1.09        | 0.89        | 1.10        | 1.32        | 0.82         | 1.23         | 1.74            | 1.70          | 1.93          | 1.90          | 0.98          |
| 548             | 0.16            | 0.90       | 1.11        | 0.95        | 1.28        | 1.23        | 0.86         | 1.35         | 5.91            | 7.24          | 8.32          | 8.74          | 1.22          |
| 549             | 0.75            | 1.18       | 1.56        | 1.26        | 1.45        | 1.32        | 0.81         | 1.15         | 1.40            | 1.51          | 2.06          | 1.68          | 1.08          |
| 551             | 0.61            | 2.49       | 1.16        | 2.04        | 3.29        | 0.47        | 1.76         | 1.61         | 1.13            | 1.00          | 6.51          | 18.77         | 0.88          |
| 557             | 0.98            | 0.87       | 1.04        | 0.84        | 0.65        | 1.19        | 0.81         | 0.77         | 1.39            | 0.96          | 0.54          | 0.33          | 0.69          |
| 559             | 0.52            | 3.73       | 3.48        | 3.64        | 4.20        | 0.93        | 1.05         | 1.15         | 4.06            | 2.73          | 1.31          | 1.48          | 0.67          |
| 561             | 1.53            | 0.62       | 0.93        | 0.63        | 0.62        | 1.49        | 0.67         | 0.99         | 1.18            | 0.68          | 0.16          | 0.11          | 0.58          |
| 565             | 0.20            | 1.00       | 1.03        | 1.00        | 1.00        | 1.03        | 0.97         | 1.00         | 15.80           | 16.12         | 8.80          | 5.09          | 1.02          |
| 566             | 0.91            | 0.97       | 1.27        | 0.89        | 0.91        | 1.31        | 0.70         | 1.02         | 1.43            | 1.14          | 1.46          | 1.22          | 0.80          |
| 569             | 0.27            | 1.00       | 1.06        | 0.70        | 0.81        | 1.06        | 0.65         | 1.16         | 1.78            | 4.38          | 7.21          | 7.15          | 2.46          |

| PATHWAY<br>SORT | ANVOA Contrasts |            |             |             |             |             |              |              | ANVOA Contrasts |               |               |               |               |
|-----------------|-----------------|------------|-------------|-------------|-------------|-------------|--------------|--------------|-----------------|---------------|---------------|---------------|---------------|
|                 | T2-28<br>T1-28  | C-7<br>C-0 | C-14<br>C-0 | C-21<br>C-0 | C-28<br>C-0 | C-14<br>C-7 | C-21<br>C-14 | C-28<br>C-21 | T1-7<br>T1-0    | T1-14<br>T1-0 | T1-21<br>T1-0 | T1-28<br>T1-0 | T1-14<br>T1-7 |
| 570             | 0.89            | 1.16       | 1.97        | 1.73        | 1.72        | 1.70        | 0.88         | 0.99         | 1.09            | 1.36          | 1.94          | 1.29          | 1.25          |
| 579             | 1.27            | 0.86       | 0.89        | 0.67        | 0.61        | 1.03        | 0.76         | 0.90         | 1.03            | 0.83          | 0.83          | 0.54          | 0.81          |
| 582             | 1.03            | 1.27       | 1.53        | 1.49        | 1.22        | 1.20        | 0.97         | 0.82         | 1.66            | 1.69          | 2.01          | 1.86          | 1.02          |
| 591             | 0.94            | 1.02       | 1.15        | 1.23        | 1.21        | 1.13        | 1.07         | 0.98         | 1.19            | 1.19          | 1.39          | 1.46          | 1.00          |
| 594             | 1.02            | 1.08       | 1.35        | 1.39        | 1.28        | 1.25        | 1.03         | 0.92         | 1.71            | 1.84          | 2.61          | 1.89          | 1.07          |
| 598             | 0.85            | 1.28       | 1.87        | 1.70        | 2.12        | 1.47        | 0.91         | 1.25         | 2.61            | 2.99          | 3.88          | 2.81          | 1.14          |
| 601             | 0.94            | 1.04       | 1.13        | 0.92        | 1.03        | 1.09        | 0.81         | 1.12         | 1.26            | 1.17          | 1.33          | 1.20          | 0.93          |
| 602             | 1.05            | 1.03       | 1.36        | 1.14        | 1.18        | 1.32        | 0.84         | 1.03         | 1.00            | 0.95          | 1.40          | 1.47          | 0.95          |
| 603             | 0.70            | 0.92       | 0.49        | 0.15        | 0.37        | 0.54        | 0.30         | 2.50         | 0.45            | 0.44          | 0.38          | 0.26          | 0.98          |
| 604             | 1.03            | 1.24       | 1.38        | 1.85        | 1.49        | 1.11        | 1.34         | 0.80         | 1.67            | 1.63          | 2.30          | 2.16          | 0.98          |
| 608             | 1.07            | 1.21       | 1.32        | 1.51        | 1.54        | 1.09        | 1.15         | 1.02         | 1.33            | 1.20          | 1.54          | 1.54          | 0.90          |
| 609             | 1.12            | 0.94       | 1.27        | 1.71        | 1.30        | 1.34        | 1.35         | 0.76         | 1.27            | 1.22          | 1.85          | 1.90          | 0.96          |
| 610             | 1.02            | 1.18       | 1.17        | 1.83        | 1.86        | 1.00        | 1.56         | 1.02         | 1.24            | 1.18          | 1.43          | 1.53          | 0.95          |
| 611             | 1.18            | 1.78       | 1.83        | 3.08        | 2.71        | 1.03        | 1.68         | 0.88         | 1.49            | 1.84          | 2.42          | 2.76          | 1.23          |
| 613             | 1.25            | 1.53       | 1.49        | 2.39        | 1.87        | 0.98        | 1.60         | 0.78         | 1.75            | 1.64          | 2.31          | 2.49          | 0.94          |
| 618             | 1.92            | 0.77       | 0.61        | 0.52        | 0.57        | 0.79        | 0.86         | 1.08         | 1.18            | 0.64          | 0.67          | 0.40          | 0.54          |
| 619             | 1.85            | 1.31       | 1.28        | 1.12        | 1.32        | 0.98        | 0.88         | 1.17         | 1.61            | 1.13          | 1.17          | 0.77          | 0.71          |
| 620             | 1.98            | 0.97       | 1.30        | 1.23        | 0.96        | 1.34        | 0.95         | 0.78         | 2.29            | 1.60          | 1.77          | 1.09          | 0.70          |
| 621             | 1.55            | 1.75       | 1.94        | 1.68        | 1.62        | 1.11        | 0.86         | 0.97         | 2.35            | 1.99          | 1.88          | 1.56          | 0.84          |
| 622             | 1.10            | 1.76       | 2.38        | 2.16        | 1.98        | 1.36        | 0.91         | 0.92         | 2.06            | 2.12          | 2.10          | 2.08          | 1.03          |
| 625             | 1.15            | 1.19       | 1.14        | 1.37        | 1.23        | 0.96        | 1.20         | 0.90         | 1.26            | 1.29          | 1.18          | 1.16          | 1.03          |
| 629             | 1.18            | 1.78       | 2.03        | 2.47        | 1.99        | 1.14        | 1.22         | 0.81         | 2.04            | 2.08          | 2.43          | 2.19          | 1.02          |
| 630             | 2.01            | 0.52       | 0.67        | 1.30        | 0.80        | 1.29        | 1.92         | 0.62         | 1.39            | 1.97          | 1.39          | 1.27          | 1.42          |
| 631             | 1.17            | 1.52       | 1.56        | 1.95        | 1.51        | 1.03        | 1.25         | 0.77         | 1.45            | 1.41          | 1.84          | 1.64          | 0.97          |
| 632             | 1.19            | 1.26       | 1.44        | 1.58        | 1.42        | 1.15        | 1.09         | 0.90         | 1.43            | 1.57          | 2.02          | 1.70          | 1.10          |
| 633             | 1.06            | 1.42       | 1.12        | 1.56        | 1.46        | 0.79        | 1.39         | 0.94         | 1.48            | 1.64          | 2.24          | 1.62          | 1.11          |
| 635             | 1.41            | 1.45       | 1.65        | 1.92        | 1.64        | 1.14        | 1.16         | 0.85         | 1.56            | 1.65          | 1.93          | 1.71          | 1.06          |
| 636             | 1.27            | 1.27       | 1.35        | 1.89        | 1.59        | 1.06        | 1.41         | 0.84         | 1.44            | 1.44          | 1.78          | 1.55          | 0.99          |
| 637             | 1.27            | 1.35       | 1.60        | 1.71        | 1.52        | 1.19        | 1.07         | 0.89         | 1.59            | 1.65          | 2.05          | 1.73          | 1.04          |
| 639             | 0.83            | 0.90       | 1.08        | 0.95        | 0.94        | 1.20        | 0.88         | 0.99         | 1.25            | 1.47          | 1.42          | 1.38          | 1.17          |
| 641             | 0.50            | 0.91       | 1.14        | 1.23        | 1.24        | 1.26        | 1.08         | 1.01         | 1.71            | 0.74          | 1.94          | 2.45          | 0.43          |
| 655             | 1.14            | 1.56       | 1.50        | 2.02        | 1.77        | 0.96        | 1.35         | 0.87         | 1.78            | 1.85          | 2.36          | 2.35          | 1.04          |
| 658             | 1.22            | 0.47       | 0.95        | 0.75        | 0.89        | 2.03        | 0.78         | 1.19         | 1.43            | 1.46          | 1.63          | 1.53          | 1.02          |
| 659             | 1.12            | 1.15       | 1.26        | 1.92        | 1.64        | 1.10        | 1.52         | 0.86         | 1.30            | 1.18          | 1.94          | 2.22          | 0.91          |
| 665             | 1.27            | 0.52       | 0.53        | 0.47        | 0.44        | 1.02        | 0.88         | 0.94         | 0.68            | 0.41          | 0.67          | 0.65          | 0.60          |
| 670.01          | 1.01            | 9.57       | 12.97       | 17.93       | 19.42       | 1.36        | 1.38         | 1.08         | 9.63            | 14.52         | 14.71         | 18.06         | 1.51          |
| 672             | 0.93            | 21.88      | 34.28       | 39.21       | 40.88       | 1.57        | 1.14         | 1.04         | 24.53           | 35.00         | 42.49         | 44.03         | 1.43          |
| 706             | 1.03            | 0.94       | 1.31        | 1.08        | 0.89        | 1.40        | 0.82         | 0.82         | 1.55            | 1.66          | 3.29          | 1.90          | 1.07          |
| 714             | 0.72            | 1.18       | 1.64        | 1.74        | 2.18        | 1.39        | 1.06         | 1.25         | 2.95            | 2.85          | 3.61          | 3.84          | 0.97          |
| 721             | 0.96            | 3.49       | 7.46        | 9.03        | 11.32       | 2.14        | 1.21         | 1.25         | 3.08            | 4.73          | 6.79          | 8.60          | 1.54          |
| 735             | 0.46            | 0.61       | 0.97        | 0.28        | 1.00        | 1.59        | 0.29         | 3.57         | 0.52            | 0.87          | 0.49          | 0.93          | 1.67          |

| PATHWAY<br>SORT | ANVOA Contrasts |            |             |             |             |             |              |              | ANVOA Contrasts |               |               |               |               |
|-----------------|-----------------|------------|-------------|-------------|-------------|-------------|--------------|--------------|-----------------|---------------|---------------|---------------|---------------|
|                 | T2-28<br>T1-28  | C-7<br>C-0 | C-14<br>C-0 | C-21<br>C-0 | C-28<br>C-0 | C-14<br>C-7 | C-21<br>C-14 | C-28<br>C-21 | T1-7<br>T1-0    | T1-14<br>T1-0 | T1-21<br>T1-0 | T1-28<br>T1-0 | T1-14<br>T1-7 |
| 742             | 1.09            | 1.71       | 1.99        | 2.36        | 2.13        | 1.16        | 1.18         | 0.90         | 1.80            | 2.28          | 2.66          | 2.68          | 1.27          |
| 744             | 1.43            | 1.67       | 2.03        | 2.76        | 2.43        | 1.22        | 1.36         | 0.88         | 1.66            | 1.97          | 2.47          | 2.37          | 1.19          |
| 809             | 1.27            | 0.96       | 0.91        | 0.85        | 0.82        | 0.95        | 0.93         | 0.97         | 0.99            | 0.79          | 0.81          | 0.71          | 0.79          |
| 811             | 1.02            | 1.08       | 0.63        | 0.99        | 1.10        | 0.58        | 1.58         | 1.11         | 0.84            | 0.45          | 1.06          | 0.54          | 0.54          |
| 819             | 0.99            | 0.97       | 1.04        | 1.15        | 1.04        | 1.07        | 1.11         | 0.90         | 1.11            | 1.12          | 1.16          | 1.10          | 1.00          |
| 820             | 0.97            | 1.05       | 1.14        | 1.08        | 1.06        | 1.09        | 0.95         | 0.97         | 1.16            | 1.18          | 1.15          | 1.16          | 1.01          |
| 821             | 1.04            | 1.12       | 1.19        | 1.23        | 1.21        | 1.05        | 1.03         | 0.99         | 1.18            | 1.12          | 1.22          | 1.18          | 0.95          |
| 822             | 1.09            | 0.95       | 0.95        | 0.96        | 0.89        | 0.99        | 1.01         | 0.93         | 1.15            | 0.96          | 0.97          | 0.89          | 0.84          |
| 823             | 1.04            | 0.61       | 0.48        | 0.60        | 0.70        | 0.78        | 1.26         | 1.15         | 0.84            | 0.68          | 1.09          | 1.01          | 0.81          |
| 825             | 0.99            | 1.07       | 1.12        | 1.29        | 1.20        | 1.05        | 1.16         | 0.93         | 1.24            | 1.35          | 1.66          | 1.40          | 1.09          |
| 833             | 0.36            | 6.66       | 11.08       | 14.45       | 81.48       | 1.66        | 1.30         | 5.64         | 6.07            | 8.79          | 13.36         | 10.83         | 1.45          |
| 834             | 0.38            | 3.03       | 7.91        | 9.88        | 47.10       | 2.61        | 1.25         | 4.77         | 9.39            | 14.61         | 21.89         | 16.73         | 1.56          |
| 835             | 0.36            | 4.52       | 10.06       | 13.93       | 66.06       | 2.23        | 1.39         | 4.74         | 9.27            | 14.18         | 23.23         | 14.68         | 1.53          |
| 840             | 0.95            | 0.99       | 0.89        | 0.87        | 0.78        | 0.89        | 0.98         | 0.90         | 1.11            | 0.95          | 0.93          | 1.21          | 0.86          |
| 849             | 1.03            | 0.81       | 1.19        | 0.99        | 1.20        | 1.48        | 0.83         | 1.21         | 1.23            | 1.69          | 1.56          | 1.58          | 1.38          |
| 851             | 0.93            | 0.83       | 0.83        | 0.79        | 0.66        | 1.00        | 0.95         | 0.83         | 1.20            | 1.08          | 1.07          | 1.13          | 0.90          |
| 876             | 0.52            | 1.07       | 1.62        | 0.99        | 1.83        | 1.52        | 0.61         | 1.85         | 1.67            | 1.80          | 2.45          | 2.49          | 1.08          |
| 877             | 1.50            | 1.20       | 1.88        | 1.00        | 1.19        | 1.56        | 0.53         | 1.19         | 0.52            | 0.63          | 0.69          | 0.48          | 1.22          |
| 881             | 0.94            | 1.02       | 1.11        | 1.10        | 1.05        | 1.09        | 0.99         | 0.96         | 1.18            | 1.13          | 1.16          | 1.18          | 0.95          |
| 882             | 0.96            | 0.86       | 0.98        | 0.78        | 0.67        | 1.14        | 0.80         | 0.86         | 1.51            | 0.78          | 0.46          | 0.32          | 0.52          |
| 883             | 0.89            | 0.95       | 0.97        | 0.94        | 0.96        | 1.02        | 0.97         | 1.02         | 1.01            | 1.06          | 1.15          | 1.19          | 1.05          |
| 890             | 0.79            | 0.90       | 1.04        | 0.79        | 0.87        | 1.15        | 0.76         | 1.10         | 1.06            | 0.95          | 1.01          | 1.03          | 0.90          |
| 905             | 0.96            | 2.12       | 3.84        | 3.73        | 4.68        | 1.81        | 0.97         | 1.25         | 3.24            | 3.31          | 4.75          | 5.31          | 1.02          |
| 909             | 1.65            | 0.67       | 0.75        | 0.60        | 0.56        | 1.12        | 0.80         | 0.94         | 1.40            | 0.99          | 2.27          | 1.01          | 0.70          |
| 915             | 0.93            | 0.85       | 0.80        | 0.95        | 0.63        | 0.93        | 1.19         | 0.66         | 1.12            | 0.75          | 1.46          | 1.16          | 0.67          |
| 919             | 1.33            | 0.68       | 0.68        | 0.61        | 0.47        | 1.00        | 0.91         | 0.77         | 1.05            | 1.06          | 1.33          | 0.91          | 1.01          |
| 920             | 0.49            | 5.76       | 9.20        | 13.64       | 35.01       | 1.60        | 1.48         | 2.57         | 8.54            | 13.05         | 14.00         | 11.73         | 1.53          |
| 922             | 0.56            | 2.84       | 7.25        | 9.12        | 24.26       | 2.55        | 1.26         | 2.66         | 7.30            | 10.02         | 11.26         | 7.91          | 1.37          |
| 923             | 0.39            | 3.40       | 6.52        | 7.20        | 21.36       | 1.92        | 1.10         | 2.97         | 6.91            | 10.88         | 12.35         | 10.37         | 1.58          |
| 926             | 0.29            | 1.28       | 2.06        | 2.02        | 5.76        | 1.60        | 0.98         | 2.86         | 2.06            | 5.22          | 6.62          | 7.59          | 2.54          |
| 929             | 0.68            | 4.44       | 13.73       | 20.75       | 43.62       | 3.09        | 1.51         | 2.10         | 10.27           | 11.68         | 21.94         | 13.82         | 1.14          |
| 930             | 0.43            | 3.32       | 6.52        | 8.98        | 27.45       | 1.96        | 1.38         | 3.06         | 12.38           | 22.87         | 27.13         | 25.19         | 1.85          |
| 934             | 0.45            | 4.27       | 11.26       | 16.01       | 49.02       | 2.64        | 1.42         | 3.06         | 10.28           | 17.49         | 24.04         | 19.45         | 1.70          |
| 935             | 0.55            | 1.55       | 4.31        | 5.40        | 16.42       | 2.78        | 1.25         | 3.04         | 6.94            | 11.86         | 15.48         | 13.89         | 1.71          |
| 936             | 0.55            | 3.66       | 11.74       | 17.24       | 51.40       | 3.21        | 1.47         | 2.98         | 13.39           | 15.11         | 31.18         | 17.59         | 1.13          |
| 937             | 0.47            | 1.62       | 3.26        | 3.99        | 11.41       | 2.01        | 1.22         | 2.86         | 4.23            | 4.98          | 8.32          | 5.76          | 1.18          |
| 938             | 1.33            | 0.88       | 0.94        | 0.95        | 0.71        | 1.07        | 1.00         | 0.75         | 1.07            | 1.08          | 1.75          | 1.04          | 1.00          |
| 939             | 0.41            | 1.65       | 2.01        | 3.80        | 9.61        | 1.22        | 1.89         | 2.53         | 4.19            | 7.98          | 8.53          | 7.94          | 1.90          |

| PATHWAY<br>SORT | ANVOA Contrasts |            |             |             |             |             |              |              | ANVOA Contrasts |               |               |               |               |
|-----------------|-----------------|------------|-------------|-------------|-------------|-------------|--------------|--------------|-----------------|---------------|---------------|---------------|---------------|
|                 | T2-28<br>T1-28  | C-7<br>C-0 | C-14<br>C-0 | C-21<br>C-0 | C-28<br>C-0 | C-14<br>C-7 | C-21<br>C-14 | C-28<br>C-21 | T1-7<br>T1-0    | T1-14<br>T1-0 | T1-21<br>T1-0 | T1-28<br>T1-0 | T1-14<br>T1-7 |
| 945             | 0.26            | 1.78       | 2.71        | 3.81        | 13.65       | 1.52        | 1.41         | 3.58         | 4.42            | 7.52          | 8.41          | 8.59          | 1.70          |
| 970             | 1.35            | 1.69       | 1.24        | 1.21        | 1.26        | 0.73        | 0.98         | 1.04         | 1.58            | 1.82          | 1.57          | 1.47          | 1.15          |
| 1004            | 0.92            | 0.92       | 1.17        | 0.87        | 0.96        | 1.26        | 0.74         | 1.11         | 1.26            | 1.18          | 1.36          | 1.25          | 0.94          |
| 1005            | 0.95            | 0.93       | 1.09        | 1.02        | 0.97        | 1.18        | 0.93         | 0.95         | 1.27            | 1.17          | 1.32          | 1.17          | 0.92          |
| 1018            | 0.73            | 0.83       | 0.99        | 0.76        | 0.81        | 1.19        | 0.77         | 1.07         | 1.39            | 1.30          | 1.31          | 1.53          | 0.94          |
| 1020            | 0.88            | 0.96       | 1.19        | 0.91        | 0.97        | 1.23        | 0.76         | 1.07         | 1.11            | 1.09          | 1.24          | 1.21          | 0.98          |
| 1024            | 0.85            | 0.97       | 1.71        | 0.97        | 0.72        | 1.75        | 0.57         | 0.74         | 1.09            | 1.13          | 1.59          | 1.51          | 1.04          |
| 1034            | 0.96            | 1.23       | 1.23        | 1.03        | 1.33        | 1.00        | 0.84         | 1.29         | 1.11            | 0.72          | 1.01          | 1.15          | 0.65          |
| 1057            | 0.80            | 1.75       | 2.37        | 1.56        | 1.05        | 1.36        | 0.66         | 0.68         | 0.94            | 1.62          | 1.48          | 1.17          | 1.71          |
| 1059            | 0.40            | 0.97       | 1.28        | 1.22        | 1.52        | 1.33        | 0.95         | 1.24         | 0.91            | 0.96          | 1.76          | 1.49          | 1.06          |
| 1098            | 0.33            | 1.10       | 3.84        | 9.09        | 19.10       | 3.49        | 2.36         | 2.10         | 72.66           | 70.11         | 86.08         | 75.62         | 0.96          |
| 1101            | 0.63            | 2.13       | 3.73        | 2.11        | 2.17        | 1.75        | 0.56         | 1.03         | 1.58            | 2.67          | 4.07          | 4.19          | 1.69          |
| 1105            | 0.70            | 0.85       | 0.73        | 0.68        | 0.63        | 0.85        | 0.94         | 0.92         | 1.11            | 0.89          | 0.80          | 0.52          | 0.80          |
| 1106            | 0.79            | 0.55       | 1.08        | 1.06        | 0.73        | 1.96        | 0.99         | 0.69         | 1.94            | 2.23          | 2.28          | 2.08          | 1.15          |
| 1114            | 1.46            | 1.05       | 1.68        | 1.96        | 1.87        | 1.60        | 1.17         | 0.96         | 1.00            | 0.64          | 1.33          | 1.31          | 0.64          |
| 1116            | 1.84            | 0.97       | 1.06        | 0.94        | 0.74        | 1.10        | 0.88         | 0.79         | 0.79            | 0.58          | 0.68          | 0.51          | 0.74          |
| 1128            | 1.27            | 1.08       | 1.19        | 1.15        | 1.15        | 1.10        | 0.96         | 1.01         | 1.28            | 1.06          | 1.24          | 0.75          | 0.82          |
| 1149            | 1.23            | 0.91       | 0.97        | 0.92        | 0.77        | 1.07        | 0.94         | 0.84         | 1.08            | 0.80          | 0.97          | 0.81          | 0.73          |
| 1150            | 1.49            | 0.74       | 0.39        | 1.22        | 1.03        | 0.53        | 3.09         | 0.84         | 1.06            | 0.71          | 1.75          | 1.15          | 0.67          |
| 1180            | 0.97            | 1.23       | 1.32        | 1.55        | 1.43        | 1.07        | 1.18         | 0.92         | 1.65            | 1.56          | 1.52          | 1.76          | 0.94          |
| 1181            | 1.02            | 0.80       | 0.88        | 1.23        | 1.06        | 1.09        | 1.40         | 0.86         | 1.32            | 1.71          | 1.84          | 1.60          | 1.30          |
| 1199            | 0.83            | 0.85       | 1.04        | 0.92        | 0.88        | 1.22        | 0.89         | 0.95         | 1.26            | 1.28          | 1.64          | 1.53          | 1.01          |
| 1202            | 1.25            | 1.19       | 1.41        | 1.06        | 1.32        | 1.18        | 0.75         | 1.25         | 1.20            | 0.99          | 1.40          | 0.90          | 0.83          |
| 1212            | 0.33            | 3.22       | 4.05        | 4.83        | 15.46       | 1.26        | 1.19         | 3.20         | 4.28            | 6.33          | 5.14          | 4.00          | 1.48          |
| 1216            | 0.68            | 1.29       | 0.96        | 1.50        | 1.89        | 0.75        | 1.57         | 1.26         | 3.22            | 4.16          | 4.31          | 2.88          | 1.29          |
| 1221            | 0.93            | 0.96       | 1.15        | 1.34        | 1.05        | 1.20        | 1.16         | 0.79         | 1.48            | 1.17          | 1.35          | 1.40          | 0.79          |
| 1224            | 1.30            | 1.20       | 1.10        | 1.15        | 1.50        | 0.92        | 1.05         | 1.30         | 1.25            | 0.51          | 0.47          | 0.44          | 0.41          |
| 1232            | 1.00            | 1.11       | 1.08        | 1.08        | 0.95        | 0.98        | 0.99         | 0.88         | 1.29            | 1.14          | 1.07          | 0.87          | 0.88          |
| 1242            | 0.95            | 0.93       | 0.98        | 1.03        | 0.97        | 1.06        | 1.05         | 0.94         | 1.12            | 1.06          | 1.14          | 1.06          | 0.94          |

| PATHWAY<br>AY<br>SORT | ANVOA Contrasts       |                   |                    |                    |                    |                    |                     |                     | ANVOA Contrasts     |                      |                      |                      |                      |
|-----------------------|-----------------------|-------------------|--------------------|--------------------|--------------------|--------------------|---------------------|---------------------|---------------------|----------------------|----------------------|----------------------|----------------------|
|                       | <u>T2-28</u><br>T1-28 | <u>C-7</u><br>C-0 | <u>C-14</u><br>C-0 | <u>C-21</u><br>C-0 | <u>C-28</u><br>C-0 | <u>C-14</u><br>C-7 | <u>C-21</u><br>C-14 | <u>C-28</u><br>C-21 | <u>T1-7</u><br>T1-0 | <u>T1-14</u><br>T1-0 | <u>T1-21</u><br>T1-0 | <u>T1-28</u><br>T1-0 | <u>T1-14</u><br>T1-7 |
| 1242.1                | 0.92                  | 1.21              | 0.97               | 0.89               | 0.97               | 0.80               | 0.92                | 1.10                | 0.91                | 1.05                 | 0.85                 | 0.91                 | 1.17                 |
| 1243                  | 0.84                  | 0.92              | 1.12               | 1.33               | 1.09               | 1.22               | 1.19                | 0.82                | 1.14                | 1.12                 | 1.19                 | 1.25                 | 0.99                 |
| 1266                  | 0.84                  | 0.84              | 1.03               | 0.68               | 0.72               | 1.22               | 0.67                | 1.06                | 0.97                | 1.19                 | 1.55                 | 1.25                 | 1.23                 |
| 1288                  | 0.96                  | 1.23              | 1.12               | 1.19               | 1.05               | 0.91               | 1.06                | 0.88                | 1.23                | 1.17                 | 1.30                 | 1.17                 | 0.95                 |
| 1300                  | 0.93                  | 1.04              | 1.08               | 1.09               | 1.01               | 1.03               | 1.01                | 0.92                | 1.12                | 1.05                 | 1.13                 | 1.11                 | 0.93                 |
| 1318                  | 0.82                  | 1.05              | 1.23               | 0.98               | 1.02               | 1.17               | 0.80                | 1.04                | 1.23                | 1.08                 | 1.40                 | 1.29                 | 0.88                 |
| 1360                  | 1.20                  | 0.94              | 0.86               | 0.86               | 0.62               | 0.92               | 1.00                | 0.73                | 1.24                | 0.82                 | 0.82                 | 0.51                 | 0.66                 |
| 1469                  | 1.07                  | 0.93              | 1.12               | 1.10               | 1.06               | 1.20               | 0.98                | 0.97                | 1.09                | 1.07                 | 1.26                 | 1.02                 | 0.99                 |
| 1531                  | 0.90                  | 0.86              | 0.93               | 0.66               | 0.70               | 1.08               | 0.71                | 1.06                | 1.39                | 1.03                 | 1.36                 | 0.92                 | 0.74                 |
| 1565                  | 1.08                  | 0.91              | 0.98               | 1.00               | 0.91               | 1.08               | 1.01                | 0.91                | 1.15                | 1.04                 | 1.18                 | 1.15                 | 0.90                 |
| 1584                  | 0.99                  | 0.97              | 0.95               | 0.94               | 0.93               | 0.98               | 1.00                | 0.99                | 1.17                | 1.09                 | 1.14                 | 1.22                 | 0.94                 |
| 1585                  | 0.71                  | 0.82              | 0.95               | 0.81               | 0.89               | 1.16               | 0.86                | 1.10                | 0.74                | 1.02                 | 0.96                 | 1.06                 | 1.39                 |
| 1612                  | 0.91                  | 0.98              | 1.01               | 1.02               | 0.92               | 1.03               | 1.01                | 0.91                | 1.13                | 1.08                 | 1.22                 | 1.13                 | 0.95                 |
| 1613                  | 0.87                  | 1.17              | 1.14               | 1.09               | 1.08               | 0.97               | 0.96                | 0.99                | 1.21                | 1.29                 | 1.15                 | 1.24                 | 1.07                 |
| 1614                  | 1.05                  | 0.98              | 1.08               | 1.16               | 1.13               | 1.10               | 1.07                | 0.97                | 1.00                | 0.90                 | 1.16                 | 1.11                 | 0.90                 |
| 1615                  | 1.02                  | 1.12              | 1.28               | 1.41               | 0.94               | 1.15               | 1.10                | 0.67                | 1.13                | 1.69                 | 0.83                 | 1.20                 | 1.49                 |
| 1632                  | 0.44                  | 1.19              | 1.72               | 1.79               | 2.21               | 1.45               | 1.04                | 1.24                | 1.68                | 2.49                 | 4.21                 | 4.84                 | 1.48                 |
| 1662                  | 1.13                  | 0.92              | 0.82               | 0.86               | 0.84               | 0.90               | 1.04                | 0.99                | 1.21                | 1.07                 | 1.23                 | 1.00                 | 0.89                 |



| PATHWAY<br>SORT | ANOVA Contrasts       |                       |                     |                      |                      |                      |                      |                       |                       |
|-----------------|-----------------------|-----------------------|---------------------|----------------------|----------------------|----------------------|----------------------|-----------------------|-----------------------|
|                 | <u>T1-21</u><br>T1-14 | <u>T1-28</u><br>T1-21 | <u>T2-7</u><br>T2-0 | <u>T2-14</u><br>T2-0 | <u>T2-21</u><br>T2-0 | <u>T2-28</u><br>T2-0 | <u>T2-14</u><br>T2-7 | <u>T2-21</u><br>T2-14 | <u>T2-28</u><br>T2-21 |
| 1               | 1.38                  | 1.11                  | 1.24                | 1.63                 | 1.78                 | 2.38                 | 1.31                 | 1.10                  | 1.33                  |
| 3               | 0.75                  | 1.25                  | 1.16                | 1.11                 | 1.81                 | 1.39                 | 0.96                 | 1.63                  | 0.76                  |
| 4               | 1.24                  | 0.91                  | 0.97                | 1.39                 | 0.87                 | 0.90                 | 1.43                 | 0.62                  | 1.03                  |
| 7               | 0.97                  | 0.99                  | 1.11                | 1.20                 | 0.82                 | 1.18                 | 1.08                 | 0.68                  | 1.45                  |
| 8               | 1.18                  | 0.99                  | 1.13                | 1.16                 | 1.07                 | 1.14                 | 1.03                 | 0.93                  | 1.06                  |
| 17              | 0.94                  | 1.08                  | 1.14                | 1.19                 | 1.02                 | 1.16                 | 1.05                 | 0.86                  | 1.14                  |
| 22              | 1.03                  | 1.03                  | 1.00                | 1.07                 | 0.97                 | 1.02                 | 1.07                 | 0.90                  | 1.05                  |
| 24              | 1.18                  | 0.79                  | 0.95                | 1.14                 | 1.24                 | 1.13                 | 1.21                 | 1.08                  | 0.91                  |
| 25              | 1.09                  | 0.97                  | 0.93                | 0.91                 | 0.78                 | 0.64                 | 0.97                 | 0.86                  | 0.82                  |
| 26              | 1.07                  | 1.18                  | 0.99                | 1.13                 | 0.84                 | 0.46                 | 1.15                 | 0.74                  | 0.55                  |
| 27              | 1.23                  | 0.97                  | 1.12                | 1.26                 | 1.17                 | 1.25                 | 1.13                 | 0.92                  | 1.07                  |
| 39              | 1.02                  | 0.98                  | 0.90                | 1.01                 | 0.85                 | 1.04                 | 1.12                 | 0.85                  | 1.22                  |
| 44              | 0.83                  | 0.96                  | 0.88                | 0.78                 | 0.68                 | 0.60                 | 0.88                 | 0.87                  | 0.88                  |
| 45              | 1.02                  | 1.05                  | 1.02                | 0.87                 | 0.80                 | 1.01                 | 0.85                 | 0.92                  | 1.26                  |
| 50              | 1.46                  | 0.84                  | 1.01                | 0.92                 | 1.03                 | 0.99                 | 0.91                 | 1.12                  | 0.96                  |
| 69              | 1.06                  | 1.07                  | 1.11                | 1.13                 | 1.29                 | 0.86                 | 1.02                 | 1.14                  | 0.67                  |
| 74              | 0.96                  | 1.00                  | 1.05                | 0.89                 | 0.99                 | 1.07                 | 0.84                 | 1.12                  | 1.08                  |
| 75              | 1.03                  | 1.09                  | 0.98                | 0.92                 | 0.92                 | 0.87                 | 0.93                 | 1.00                  | 0.95                  |
| 80              | 0.97                  | 0.68                  | 0.97                | 0.72                 | 0.75                 | 0.75                 | 0.75                 | 1.03                  | 1.00                  |
| 83              | 0.99                  | 1.07                  | 1.09                | 1.24                 | 1.16                 | 1.19                 | 1.14                 | 0.93                  | 1.03                  |
| 88              | 1.18                  | 0.86                  | 0.93                | 0.95                 | 0.87                 | 0.93                 | 1.02                 | 0.92                  | 1.07                  |
| 99              | 0.97                  | 1.09                  | 1.04                | 1.18                 | 1.08                 | 1.18                 | 1.14                 | 0.91                  | 1.09                  |
| 128             | 1.11                  | 0.81                  | 0.91                | 0.97                 | 0.94                 | 0.99                 | 1.07                 | 0.97                  | 1.06                  |
| 135             | 1.00                  | 1.01                  | 0.96                | 0.92                 | 0.82                 | 0.89                 | 0.96                 | 0.90                  | 1.09                  |
| 144             | 0.81                  | 0.99                  | 1.18                | 1.10                 | 1.14                 | 0.97                 | 0.94                 | 1.04                  | 0.85                  |
| 145             | 1.00                  | 1.04                  | 1.02                | 1.13                 | 1.05                 | 1.05                 | 1.11                 | 0.93                  | 1.00                  |
| 151             | 1.09                  | 1.05                  | 1.00                | 0.95                 | 0.84                 | 0.99                 | 0.95                 | 0.89                  | 1.17                  |
| 164             | 1.04                  | 1.03                  | 0.92                | 1.21                 | 1.00                 | 0.94                 | 1.31                 | 0.82                  | 0.95                  |
| 170             | 1.14                  | 0.79                  | 0.88                | 0.87                 | 0.92                 | 0.98                 | 0.99                 | 1.06                  | 1.06                  |
| 172             | 1.44                  | 1.06                  | 1.16                | 1.14                 | 0.82                 | 0.76                 | 0.98                 | 0.72                  | 0.92                  |
| 173             | 1.10                  | 1.17                  | 1.11                | 1.22                 | 1.17                 | 1.14                 | 1.10                 | 0.96                  | 0.98                  |
| 179             | 1.05                  | 1.13                  | 1.00                | 1.91                 | 2.97                 | 5.07                 | 1.91                 | 1.55                  | 1.71                  |
| 180             | 1.01                  | 1.00                  | 1.00                | 1.08                 | 1.01                 | 1.11                 | 1.08                 | 0.94                  | 1.10                  |
| 181             | 1.08                  | 0.97                  | 1.05                | 1.12                 | 1.08                 | 1.23                 | 1.06                 | 0.96                  | 1.14                  |
| 190             | 1.02                  | 1.03                  | 1.04                | 1.15                 | 1.01                 | 1.09                 | 1.10                 | 0.88                  | 1.09                  |
| 193             | 1.41                  | 1.10                  | 1.15                | 1.26                 | 0.95                 | 0.92                 | 1.09                 | 0.75                  | 0.98                  |
| 198             | 1.26                  | 0.98                  | 0.87                | 1.10                 | 1.40                 | 2.16                 | 1.26                 | 1.27                  | 1.55                  |
| 200             | 1.15                  | 0.89                  | 0.92                | 0.84                 | 0.74                 | 0.79                 | 0.91                 | 0.88                  | 1.06                  |
| 202             | 1.57                  | 0.87                  | 0.88                | 0.86                 | 0.73                 | 0.98                 | 0.97                 | 0.85                  | 1.35                  |
| 205             | 1.05                  | 1.01                  | 0.94                | 0.93                 | 0.89                 | 1.12                 | 0.99                 | 0.95                  | 1.26                  |
| 206             | 1.04                  | 0.99                  | 0.89                | 0.91                 | 0.85                 | 0.91                 | 1.02                 | 0.93                  | 1.07                  |

| PATHWAY<br>SORT | ANOVA Contrasts       |                       |                     |                      |                      |                      |                      |                       |                       |
|-----------------|-----------------------|-----------------------|---------------------|----------------------|----------------------|----------------------|----------------------|-----------------------|-----------------------|
|                 | <u>T1-21</u><br>T1-14 | <u>T1-28</u><br>T1-21 | <u>T2-7</u><br>T2-0 | <u>T2-14</u><br>T2-0 | <u>T2-21</u><br>T2-0 | <u>T2-28</u><br>T2-0 | <u>T2-14</u><br>T2-7 | <u>T2-21</u><br>T2-14 | <u>T2-28</u><br>T2-21 |
| 213             | 1.84                  | 0.88                  | 1.21                | 1.73                 | 2.69                 | 2.84                 | 1.43                 | 1.56                  | 1.05                  |
| 216             | 1.28                  | 0.77                  | 1.01                | 0.97                 | 1.25                 | 1.08                 | 0.96                 | 1.29                  | 0.87                  |
| 224             | 0.97                  | 1.16                  | 1.51                | 1.49                 | 1.29                 | 1.79                 | 0.98                 | 0.87                  | 1.39                  |
| 225             | 0.81                  | 0.92                  | 0.85                | 0.70                 | 0.51                 | 0.49                 | 0.82                 | 0.72                  | 0.97                  |
| 227             | 1.41                  | 0.89                  | 0.78                | 0.67                 | 0.91                 | 0.88                 | 0.86                 | 1.34                  | 0.97                  |
| 229             | 1.13                  | 0.85                  | 1.02                | 1.08                 | 1.03                 | 0.96                 | 1.07                 | 0.95                  | 0.93                  |
| 231             | 1.41                  | 0.89                  | 1.56                | 3.20                 | 4.19                 | 3.86                 | 2.05                 | 1.31                  | 0.92                  |
| 241             | 1.30                  | 1.03                  | 0.97                | 1.08                 | 0.97                 | 2.44                 | 1.11                 | 0.90                  | 2.51                  |
| 244             | 1.14                  | 0.96                  | 1.07                | 1.14                 | 1.01                 | 0.83                 | 1.07                 | 0.88                  | 0.82                  |
| 245             | 1.21                  | 0.92                  | 0.99                | 1.10                 | 0.98                 | 1.01                 | 1.11                 | 0.89                  | 1.03                  |
| 246             | 1.18                  | 0.97                  | 1.08                | 1.00                 | 0.95                 | 1.13                 | 0.93                 | 0.95                  | 1.20                  |
| 248             | 1.06                  | 1.07                  | 1.06                | 1.03                 | 1.01                 | 1.09                 | 0.98                 | 0.98                  | 1.08                  |
| 252             | 0.85                  | 1.04                  | 0.90                | 0.93                 | 1.03                 | 0.92                 | 1.03                 | 1.11                  | 0.90                  |
| 259             | 1.05                  | 0.98                  | 1.00                | 0.98                 | 0.88                 | 0.97                 | 0.99                 | 0.90                  | 1.09                  |
| 260             | 1.02                  | 1.05                  | 1.06                | 1.01                 | 1.04                 | 0.98                 | 0.96                 | 1.02                  | 0.94                  |
| 263             | 1.11                  | 1.00                  | 1.19                | 1.23                 | 1.14                 | 1.12                 | 1.03                 | 0.93                  | 0.98                  |
| 266             | 0.88                  | 0.94                  | 2.13                | 2.91                 | 2.82                 | 2.47                 | 1.36                 | 0.97                  | 0.88                  |
| 270             | 1.10                  | 1.01                  | 1.07                | 1.15                 | 1.03                 | 1.16                 | 1.07                 | 0.89                  | 1.13                  |
| 280             | 0.84                  | 0.96                  | 0.76                | 1.00                 | 0.83                 | 0.71                 | 1.32                 | 0.83                  | 0.86                  |
| 281             | 0.75                  | 0.72                  | 1.15                | 0.91                 | 1.05                 | 0.83                 | 0.79                 | 1.16                  | 0.79                  |
| 282             | 1.37                  | 1.00                  | 3.45                | 5.56                 | 6.89                 | 10.26                | 1.61                 | 1.24                  | 1.49                  |
| 283             | 0.89                  | 0.89                  | 0.80                | 0.72                 | 0.62                 | 0.58                 | 0.90                 | 0.87                  | 0.92                  |
| 285             | 0.52                  | 0.70                  | 0.28                | 0.12                 | 0.10                 | 0.09                 | 0.41                 | 0.82                  | 0.89                  |
| 404             | 0.95                  | 0.73                  | 0.71                | 0.77                 | 0.83                 | 0.67                 | 1.08                 | 1.08                  | 0.81                  |
| 453             | 1.74                  | 0.97                  | 1.19                | 1.50                 | 1.42                 | 1.65                 | 1.26                 | 0.95                  | 1.16                  |
| 455             | 2.07                  | 1.16                  | 1.87                | 2.34                 | 2.63                 | 2.39                 | 1.25                 | 1.12                  | 0.91                  |
| 472             | 1.78                  | 1.11                  | 1.08                | 1.23                 | 1.21                 | 1.19                 | 1.14                 | 0.98                  | 0.98                  |
| 478             | 1.26                  | 0.94                  | 1.13                | 1.15                 | 0.95                 | 0.90                 | 1.02                 | 0.82                  | 0.94                  |
| 482             | 1.26                  | 0.87                  | 1.00                | 1.10                 | 0.96                 | 0.96                 | 1.10                 | 0.88                  | 0.99                  |
| 487             | 1.22                  | 0.87                  | 0.94                | 0.97                 | 0.88                 | 0.88                 | 1.03                 | 0.90                  | 1.00                  |
| 489             | 1.25                  | 0.72                  | 1.16                | 1.13                 | 0.86                 | 1.03                 | 0.98                 | 0.76                  | 1.20                  |
| 496             | 0.96                  | 0.94                  | 0.96                | 1.02                 | 0.96                 | 0.96                 | 1.07                 | 0.94                  | 1.00                  |
| 501             | 1.58                  | 1.04                  | 4.73                | 7.83                 | 9.08                 | 7.87                 | 1.66                 | 1.16                  | 0.87                  |

| PATHWAY<br>SORT | ANVOA Contrasts       |                       |                     |                      |                      |                      |                      |                       |                       |
|-----------------|-----------------------|-----------------------|---------------------|----------------------|----------------------|----------------------|----------------------|-----------------------|-----------------------|
|                 | <u>T1-21</u><br>T1-14 | <u>T1-28</u><br>T1-21 | <u>T2-7</u><br>T2-0 | <u>T2-14</u><br>T2-0 | <u>T2-21</u><br>T2-0 | <u>T2-28</u><br>T2-0 | <u>T2-14</u><br>T2-7 | <u>T2-21</u><br>T2-14 | <u>T2-28</u><br>T2-21 |
| 515             | 1.63                  | 0.65                  | 1.08                | 1.06                 | 0.91                 | 0.90                 | 0.98                 | 0.86                  | 0.99                  |
| 517             | 1.35                  | 1.11                  | 1.60                | 1.97                 | 2.39                 | 2.61                 | 1.24                 | 1.21                  | 1.09                  |
| 519             | 1.78                  | 0.83                  | 1.13                | 1.07                 | 0.66                 | 1.10                 | 0.95                 | 0.62                  | 1.66                  |
| 521             | 1.09                  | 0.95                  | 0.96                | 1.00                 | 0.89                 | 0.98                 | 1.04                 | 0.89                  | 1.11                  |
| 523             | 0.81                  | 1.00                  | 0.81                | 0.76                 | 0.87                 | 0.88                 | 0.94                 | 1.14                  | 1.02                  |
| 524             | 0.78                  | 0.97                  | 1.08                | 1.06                 | 0.74                 | 1.06                 | 0.98                 | 0.70                  | 1.44                  |
| 527             | 0.47                  | 0.81                  | 1.02                | 0.92                 | 0.73                 | 0.85                 | 0.89                 | 0.79                  | 1.17                  |
| 529             | 0.50                  | 0.64                  | 0.64                | 0.38                 | 0.21                 | 0.25                 | 0.59                 | 0.55                  | 1.20                  |
| 531             | 0.13                  | 0.41                  | 2.65                | 0.90                 | 1.78                 | 0.77                 | 0.34                 | 1.98                  | 0.43                  |
| 532             | 1.15                  | 0.87                  | 1.21                | 1.46                 | 0.95                 | 1.04                 | 1.20                 | 0.65                  | 1.10                  |
| 533             | 0.58                  | 0.25                  | 0.35                | 0.07                 | 0.01                 | 0.01                 | 0.19                 | 0.22                  | 0.95                  |
| 534             | 0.56                  | 0.40                  | 0.38                | 0.12                 | 0.06                 | 0.08                 | 0.32                 | 0.50                  | 1.25                  |
| 535             | 17.89                 | 1.87                  | 1.32                | 0.95                 | 0.41                 | 0.38                 | 0.72                 | 0.44                  | 0.93                  |
| 536             | 1.39                  | 1.06                  | 3.01                | 4.71                 | 5.21                 | 6.14                 | 1.56                 | 1.11                  | 1.18                  |
| 545             | 1.03                  | 0.41                  | 0.73                | 0.47                 | 0.43                 | 0.47                 | 0.65                 | 0.91                  | 1.09                  |
| 546             | 1.13                  | 0.99                  | 0.88                | 0.96                 | 0.98                 | 0.92                 | 1.09                 | 1.03                  | 0.93                  |
| 548             | 1.15                  | 1.05                  | 1.23                | 1.08                 | 1.00                 | 1.35                 | 0.88                 | 0.92                  | 1.36                  |
| 549             | 1.36                  | 0.82                  | 1.13                | 1.36                 | 1.31                 | 1.31                 | 1.20                 | 0.96                  | 1.00                  |
| 551             | 6.51                  | 2.88                  | 1.10                | 2.71                 | 1.58                 | 1.11                 | 2.46                 | 0.58                  | 0.71                  |
| 557             | 0.56                  | 0.61                  | 0.93                | 0.78                 | 0.73                 | 0.62                 | 0.84                 | 0.94                  | 0.85                  |
| 559             | 0.48                  | 1.13                  | 0.49                | 0.81                 | 0.93                 | 0.89                 | 1.64                 | 1.16                  | 0.95                  |
| 561             | 0.23                  | 0.68                  | 1.24                | 0.81                 | 0.85                 | 0.82                 | 0.65                 | 1.05                  | 0.97                  |
| 565             | 0.55                  | 0.58                  | 1.00                | 1.00                 | 1.19                 | 1.00                 | 1.00                 | 1.19                  | 0.84                  |
| 566             | 1.28                  | 0.84                  | 0.89                | 1.14                 | 0.85                 | 1.01                 | 1.29                 | 0.74                  | 1.20                  |
| 569             | 1.64                  | 0.99                  | 1.13                | 0.95                 | 0.77                 | 1.61                 | 0.84                 | 0.81                  | 2.08                  |

| PATHWAY<br>AY<br>SORT | ANVOA Contrasts       |                       |                     |                      |                      |                      |                      |                       |                       |
|-----------------------|-----------------------|-----------------------|---------------------|----------------------|----------------------|----------------------|----------------------|-----------------------|-----------------------|
|                       | <u>T1-21</u><br>T1-14 | <u>T1-28</u><br>T1-21 | <u>T2-7</u><br>T2-0 | <u>T2-14</u><br>T2-0 | <u>T2-21</u><br>T2-0 | <u>T2-28</u><br>T2-0 | <u>T2-14</u><br>T2-7 | <u>T2-21</u><br>T2-14 | <u>T2-28</u><br>T2-21 |
| 570                   | 1.43                  | 0.66                  | 0.87                | 1.32                 | 1.15                 | 1.35                 | 1.52                 | 0.87                  | 1.17                  |
| 579                   | 1.00                  | 0.65                  | 0.85                | 0.80                 | 0.68                 | 0.63                 | 0.94                 | 0.85                  | 0.93                  |
| 582                   | 1.19                  | 0.93                  | 1.47                | 1.51                 | 1.43                 | 1.73                 | 1.03                 | 0.95                  | 1.21                  |
| 591                   | 1.17                  | 1.05                  | 1.06                | 1.08                 | 0.96                 | 1.19                 | 1.02                 | 0.89                  | 1.24                  |
| 594                   | 1.42                  | 0.72                  | 1.12                | 1.12                 | 1.13                 | 1.83                 | 1.00                 | 1.01                  | 1.62                  |
| 598                   | 1.30                  | 0.72                  | 1.40                | 1.38                 | 1.40                 | 1.91                 | 0.98                 | 1.02                  | 1.36                  |
| 601                   | 1.14                  | 0.90                  | 1.08                | 1.12                 | 1.00                 | 0.93                 | 1.03                 | 0.89                  | 0.93                  |
| 602                   | 1.47                  | 1.05                  | 1.13                | 1.25                 | 1.16                 | 1.19                 | 1.11                 | 0.92                  | 1.03                  |
| 603                   | 0.86                  | 0.69                  | 0.90                | 0.63                 | 0.49                 | 0.23                 | 0.69                 | 0.78                  | 0.46                  |
| 604                   | 1.41                  | 0.94                  | 1.38                | 1.25                 | 1.31                 | 2.00                 | 0.90                 | 1.06                  | 1.52                  |
| 608                   | 1.28                  | 1.00                  | 1.60                | 1.44                 | 1.34                 | 2.03                 | 0.90                 | 0.93                  | 1.52                  |
| 609                   | 1.52                  | 1.02                  | 1.19                | 0.94                 | 1.13                 | 1.84                 | 0.79                 | 1.20                  | 1.63                  |
| 610                   | 1.21                  | 1.07                  | 1.58                | 1.18                 | 1.55                 | 2.09                 | 0.75                 | 1.31                  | 1.35                  |
| 611                   | 1.31                  | 1.14                  | 1.52                | 1.84                 | 1.87                 | 3.19                 | 1.21                 | 1.01                  | 1.71                  |
| 613                   | 1.41                  | 1.08                  | 1.57                | 1.62                 | 1.83                 | 2.94                 | 1.03                 | 1.13                  | 1.61                  |
| 618                   | 1.05                  | 0.60                  | 0.88                | 0.68                 | 0.53                 | 0.62                 | 0.77                 | 0.79                  | 1.17                  |
| 619                   | 1.04                  | 0.65                  | 1.57                | 1.61                 | 1.08                 | 1.39                 | 1.02                 | 0.67                  | 1.29                  |
| 620                   | 1.11                  | 0.62                  | 1.99                | 2.85                 | 2.60                 | 2.87                 | 1.44                 | 0.91                  | 1.10                  |
| 621                   | 0.94                  | 0.83                  | 1.95                | 2.44                 | 1.89                 | 2.26                 | 1.25                 | 0.77                  | 1.20                  |
| 622                   | 0.99                  | 0.99                  | 1.77                | 2.27                 | 1.78                 | 1.98                 | 1.28                 | 0.79                  | 1.11                  |
| 625                   | 0.91                  | 0.98                  | 1.15                | 1.23                 | 1.20                 | 1.40                 | 1.07                 | 0.98                  | 1.16                  |
| 629                   | 1.17                  | 0.90                  | 1.69                | 1.84                 | 1.69                 | 2.12                 | 1.09                 | 0.92                  | 1.25                  |
| 630                   | 0.71                  | 0.91                  | 0.84                | 1.13                 | 1.17                 | 2.11                 | 1.35                 | 1.03                  | 1.80                  |
| 631                   | 1.31                  | 0.89                  | 1.38                | 1.37                 | 1.27                 | 1.80                 | 0.99                 | 0.93                  | 1.42                  |
| 632                   | 1.29                  | 0.84                  | 1.26                | 1.18                 | 1.08                 | 1.63                 | 0.94                 | 0.91                  | 1.52                  |
| 633                   | 1.37                  | 0.72                  | 1.51                | 1.28                 | 1.51                 | 1.90                 | 0.85                 | 1.18                  | 1.26                  |
| 635                   | 1.17                  | 0.88                  | 1.40                | 1.47                 | 1.25                 | 2.11                 | 1.05                 | 0.86                  | 1.68                  |
| 636                   | 1.24                  | 0.87                  | 1.45                | 1.25                 | 1.31                 | 1.99                 | 0.86                 | 1.05                  | 1.52                  |
| 637                   | 1.24                  | 0.84                  | 1.40                | 1.34                 | 1.19                 | 1.78                 | 0.95                 | 0.89                  | 1.50                  |
| 639                   | 0.97                  | 0.97                  | 1.16                | 1.16                 | 1.25                 | 1.23                 | 1.01                 | 1.07                  | 0.99                  |
| 641                   | 2.62                  | 1.26                  | 1.00                | 0.47                 | 0.76                 | 0.79                 | 0.47                 | 1.60                  | 1.05                  |
| 655                   | 1.27                  | 1.00                  | 1.35                | 1.25                 | 1.25                 | 2.20                 | 0.92                 | 1.00                  | 1.75                  |
| 658                   | 1.11                  | 0.94                  | 1.03                | 0.51                 | 0.94                 | 1.31                 | 0.50                 | 1.85                  | 1.39                  |
| 659                   | 1.65                  | 1.14                  | 1.34                | 1.06                 | 1.26                 | 2.22                 | 0.79                 | 1.20                  | 1.75                  |
| 665                   | 1.64                  | 0.98                  | 1.93                | 0.91                 | 1.62                 | 1.69                 | 0.47                 | 1.79                  | 1.04                  |
| 670.01                | 1.01                  | 1.23                  | 8.66                | 12.28                | 13.05                | 17.23                | 1.42                 | 1.06                  | 1.32                  |
| 672                   | 1.21                  | 1.04                  | 20.38               | 25.50                | 25.76                | 35.35                | 1.25                 | 1.01                  | 1.37                  |
| 706                   | 1.98                  | 0.58                  | 0.81                | 0.78                 | 0.62                 | 0.95                 | 0.96                 | 0.79                  | 1.55                  |
| 714                   | 1.27                  | 1.06                  | 1.07                | 1.70                 | 1.44                 | 2.31                 | 1.59                 | 0.85                  | 1.61                  |
| 721                   | 1.44                  | 1.27                  | 2.76                | 4.39                 | 5.74                 | 7.70                 | 1.59                 | 1.31                  | 1.34                  |
| 735                   | 0.56                  | 1.92                  | 0.27                | 0.43                 | 0.68                 | 0.36                 | 1.59                 | 1.57                  | 0.54                  |

| PATHWAY<br>SORT | ANVOA Contrasts       |                       |                     |                      |                      |                      |                      |                       |                       |
|-----------------|-----------------------|-----------------------|---------------------|----------------------|----------------------|----------------------|----------------------|-----------------------|-----------------------|
|                 | <u>T1-21</u><br>T1-14 | <u>T1-28</u><br>T1-21 | <u>T2-7</u><br>T2-0 | <u>T2-14</u><br>T2-0 | <u>T2-21</u><br>T2-0 | <u>T2-28</u><br>T2-0 | <u>T2-14</u><br>T2-7 | <u>T2-21</u><br>T2-14 | <u>T2-28</u><br>T2-21 |
| 742             | 1.17                  | 1.01                  | 1.79                | 2.05                 | 1.84                 | 3.00                 | 1.14                 | 0.90                  | 1.63                  |
| 744             | 1.25                  | 0.96                  | 1.95                | 2.06                 | 1.83                 | 3.14                 | 1.06                 | 0.89                  | 1.72                  |
| 809             | 1.03                  | 0.87                  | 0.87                | 0.80                 | 0.66                 | 0.74                 | 0.91                 | 0.83                  | 1.12                  |
| 811             | 2.34                  | 0.51                  | 1.09                | 1.97                 | 0.95                 | 0.90                 | 1.81                 | 0.48                  | 0.94                  |
| 819             | 1.03                  | 0.95                  | 0.93                | 1.06                 | 0.82                 | 0.96                 | 1.14                 | 0.77                  | 1.17                  |
| 820             | 0.97                  | 1.02                  | 1.02                | 1.07                 | 0.95                 | 1.07                 | 1.05                 | 0.88                  | 1.13                  |
| 821             | 1.09                  | 0.97                  | 0.96                | 0.98                 | 0.92                 | 1.06                 | 1.01                 | 0.94                  | 1.16                  |
| 822             | 1.01                  | 0.92                  | 0.88                | 0.85                 | 0.73                 | 0.82                 | 0.96                 | 0.85                  | 1.13                  |
| 823             | 1.61                  | 0.92                  | 0.55                | 0.62                 | 0.48                 | 0.82                 | 1.12                 | 0.77                  | 1.72                  |
| 825             | 1.23                  | 0.84                  | 1.01                | 1.05                 | 1.01                 | 1.00                 | 1.03                 | 0.97                  | 0.99                  |
| 833             | 1.52                  | 0.81                  | 2.03                | 3.45                 | 4.07                 | 3.72                 | 1.70                 | 1.18                  | 0.91                  |
| 834             | 1.50                  | 0.76                  | 2.58                | 4.84                 | 5.74                 | 5.02                 | 1.88                 | 1.19                  | 0.88                  |
| 835             | 1.64                  | 0.63                  | 2.72                | 4.32                 | 5.10                 | 4.49                 | 1.59                 | 1.18                  | 0.88                  |
| 840             | 0.98                  | 1.30                  | 0.88                | 0.93                 | 0.89                 | 1.03                 | 1.06                 | 0.95                  | 1.16                  |
| 849             | 0.92                  | 1.02                  | 0.98                | 0.90                 | 1.02                 | 1.11                 | 0.91                 | 1.14                  | 1.08                  |
| 851             | 0.98                  | 1.06                  | 0.73                | 0.63                 | 0.62                 | 0.68                 | 0.87                 | 0.98                  | 1.09                  |
| 876             | 1.36                  | 1.02                  | 1.45                | 1.88                 | 1.52                 | 1.09                 | 1.29                 | 0.81                  | 0.72                  |
| 877             | 1.08                  | 0.70                  | 0.98                | 1.32                 | 0.80                 | 0.98                 | 1.35                 | 0.61                  | 1.23                  |
| 881             | 1.03                  | 1.01                  | 1.11                | 1.00                 | 0.96                 | 1.12                 | 0.90                 | 0.97                  | 1.16                  |
| 882             | 0.59                  | 0.70                  | 0.83                | 0.83                 | 0.69                 | 0.80                 | 0.99                 | 0.84                  | 1.16                  |
| 883             | 1.08                  | 1.04                  | 0.91                | 0.87                 | 0.82                 | 0.91                 | 0.95                 | 0.94                  | 1.12                  |
| 890             | 1.06                  | 1.02                  | 1.04                | 1.17                 | 1.01                 | 0.90                 | 1.12                 | 0.86                  | 0.89                  |
| 905             | 1.44                  | 1.12                  | 2.37                | 3.43                 | 3.36                 | 4.88                 | 1.45                 | 0.98                  | 1.45                  |
| 909             | 2.30                  | 0.45                  | 0.69                | 0.53                 | 0.59                 | 0.75                 | 0.77                 | 1.11                  | 1.27                  |
| 915             | 1.95                  | 0.79                  | 0.85                | 0.34                 | 0.41                 | 0.48                 | 0.40                 | 1.20                  | 1.17                  |
| 919             | 1.26                  | 0.68                  | 0.69                | 0.51                 | 0.52                 | 0.56                 | 0.74                 | 1.02                  | 1.07                  |
| 920             | 1.07                  | 0.84                  | 4.08                | 5.20                 | 8.12                 | 6.42                 | 1.27                 | 1.56                  | 0.79                  |
| 922             | 1.12                  | 0.70                  | 3.34                | 4.26                 | 6.59                 | 6.56                 | 1.28                 | 1.55                  | 1.00                  |
| 923             | 1.14                  | 0.84                  | 1.93                | 3.11                 | 4.03                 | 3.60                 | 1.61                 | 1.30                  | 0.89                  |
| 926             | 1.27                  | 1.15                  | 1.69                | 1.78                 | 3.46                 | 2.22                 | 1.05                 | 1.94                  | 0.64                  |
| 929             | 1.88                  | 0.63                  | 2.49                | 2.26                 | 5.93                 | 6.83                 | 0.90                 | 2.63                  | 1.15                  |
| 930             | 1.19                  | 0.93                  | 2.56                | 3.00                 | 7.07                 | 5.34                 | 1.17                 | 2.36                  | 0.75                  |
| 934             | 1.37                  | 0.81                  | 2.27                | 2.54                 | 5.85                 | 5.47                 | 1.12                 | 2.31                  | 0.93                  |
| 935             | 1.31                  | 0.90                  | 1.61                | 1.28                 | 4.11                 | 3.04                 | 0.79                 | 3.22                  | 0.74                  |
| 936             | 2.06                  | 0.56                  | 2.35                | 2.09                 | 5.40                 | 5.77                 | 0.89                 | 2.59                  | 1.07                  |
| 937             | 1.67                  | 0.69                  | 1.90                | 1.70                 | 2.69                 | 2.46                 | 0.89                 | 1.59                  | 0.92                  |
| 938             | 1.63                  | 0.60                  | 0.80                | 0.60                 | 0.61                 | 0.86                 | 0.76                 | 1.02                  | 1.40                  |
| 939             | 1.07                  | 0.93                  | 2.66                | 2.31                 | 4.75                 | 3.27                 | 0.87                 | 2.06                  | 0.69                  |

| PATHWAY<br>SORT | ANVOA Contrasts       |                       |                     |                      |                      |                      |                      |                       |                       |
|-----------------|-----------------------|-----------------------|---------------------|----------------------|----------------------|----------------------|----------------------|-----------------------|-----------------------|
|                 | <u>T1-21</u><br>T1-14 | <u>T1-28</u><br>T1-21 | <u>T2-7</u><br>T2-0 | <u>T2-14</u><br>T2-0 | <u>T2-21</u><br>T2-0 | <u>T2-28</u><br>T2-0 | <u>T2-14</u><br>T2-7 | <u>T2-21</u><br>T2-14 | <u>T2-28</u><br>T2-21 |
| 945             | 1.12                  | 1.02                  | 3.16                | 3.53                 | 6.63                 | 3.77                 | 1.12                 | 1.88                  | 0.57                  |
| 970             | 0.86                  | 0.94                  | 1.08                | 1.33                 | 1.44                 | 1.83                 | 1.23                 | 1.08                  | 1.28                  |
| 1004            | 1.15                  | 0.92                  | 1.00                | 1.10                 | 0.98                 | 0.99                 | 1.10                 | 0.89                  | 1.01                  |
| 1005            | 1.13                  | 0.89                  | 0.85                | 0.96                 | 0.86                 | 0.93                 | 1.13                 | 0.90                  | 1.08                  |
| 1018            | 1.01                  | 1.17                  | 1.11                | 1.43                 | 1.05                 | 0.96                 | 1.29                 | 0.73                  | 0.92                  |
| 1020            | 1.14                  | 0.97                  | 1.02                | 1.11                 | 1.00                 | 1.02                 | 1.09                 | 0.90                  | 1.02                  |
| 1024            | 1.40                  | 0.95                  | 0.54                | 0.73                 | 0.65                 | 0.74                 | 1.36                 | 0.88                  | 1.14                  |
| 1034            | 1.41                  | 1.13                  | 0.78                | 0.89                 | 0.80                 | 0.92                 | 1.14                 | 0.90                  | 1.14                  |
| 1057            | 0.92                  | 0.79                  | 0.36                | 0.36                 | 0.90                 | 0.73                 | 1.00                 | 2.52                  | 0.81                  |
| 1059            | 1.82                  | 0.85                  | 0.75                | 1.13                 | 0.79                 | 0.45                 | 1.51                 | 0.70                  | 0.57                  |
| 1098            | 1.23                  | 0.88                  | 1.13                | 4.90                 | 15.19                | 30.64                | 4.33                 | 3.10                  | 2.02                  |
| 1101            | 1.53                  | 1.03                  | 2.01                | 2.94                 | 2.01                 | 2.62                 | 1.46                 | 0.69                  | 1.30                  |
| 1105            | 0.90                  | 0.66                  | 0.75                | 0.52                 | 0.38                 | 0.32                 | 0.69                 | 0.73                  | 0.84                  |
| 1106            | 1.02                  | 0.92                  | 1.17                | 1.13                 | 1.60                 | 2.27                 | 0.97                 | 1.42                  | 1.42                  |
| 1114            | 2.07                  | 0.98                  | 1.15                | 1.15                 | 1.13                 | 1.90                 | 1.00                 | 0.98                  | 1.68                  |
| 1116            | 1.18                  | 0.74                  | 0.90                | 0.71                 | 0.67                 | 0.81                 | 0.79                 | 0.94                  | 1.22                  |
| 1128            | 1.18                  | 0.61                  | 0.89                | 0.89                 | 0.62                 | 0.81                 | 1.01                 | 0.69                  | 1.31                  |
| 1149            | 1.22                  | 0.83                  | 0.92                | 0.83                 | 0.73                 | 0.88                 | 0.90                 | 0.88                  | 1.21                  |
| 1150            | 2.45                  | 0.66                  | 0.46                | 0.49                 | 0.50                 | 0.71                 | 1.08                 | 1.01                  | 1.42                  |
| 1180            | 0.97                  | 1.16                  | 1.29                | 1.42                 | 1.43                 | 1.98                 | 1.10                 | 1.01                  | 1.39                  |
| 1181            | 1.07                  | 0.87                  | 0.96                | 0.79                 | 0.69                 | 0.87                 | 0.83                 | 0.87                  | 1.27                  |
| 1199            | 1.28                  | 0.93                  | 0.99                | 1.05                 | 0.95                 | 1.06                 | 1.06                 | 0.90                  | 1.12                  |
| 1202            | 1.41                  | 0.65                  | 1.09                | 0.94                 | 0.98                 | 1.17                 | 0.86                 | 1.04                  | 1.20                  |
| 1212            | 0.81                  | 0.78                  | 1.29                | 1.63                 | 2.59                 | 1.14                 | 1.26                 | 1.59                  | 0.44                  |
| 1216            | 1.04                  | 0.67                  | 1.06                | 1.75                 | 2.04                 | 1.60                 | 1.65                 | 1.16                  | 0.78                  |
| 1221            | 1.15                  | 1.04                  | 1.13                | 1.13                 | 1.18                 | 1.22                 | 1.00                 | 1.04                  | 1.03                  |
| 1224            | 0.92                  | 0.93                  | 1.04                | 1.66                 | 1.98                 | 1.03                 | 1.59                 | 1.19                  | 0.52                  |
| 1232            | 0.94                  | 0.81                  | 0.98                | 0.95                 | 0.81                 | 0.80                 | 0.97                 | 0.85                  | 0.99                  |
| 1242            | 1.08                  | 0.93                  | 1.01                | 0.98                 | 0.90                 | 0.95                 | 0.97                 | 0.93                  | 1.05                  |

| PATHWAY<br>AY<br>SORT | ANVOA Contrasts       |                       |                     |                      |                      |                      |                      |                       |                       |
|-----------------------|-----------------------|-----------------------|---------------------|----------------------|----------------------|----------------------|----------------------|-----------------------|-----------------------|
|                       | <u>T1-21</u><br>T1-14 | <u>T1-28</u><br>T1-21 | <u>T2-7</u><br>T2-0 | <u>T2-14</u><br>T2-0 | <u>T2-21</u><br>T2-0 | <u>T2-28</u><br>T2-0 | <u>T2-14</u><br>T2-7 | <u>T2-21</u><br>T2-14 | <u>T2-28</u><br>T2-21 |
| 1242.1                | 0.81                  | 1.07                  | 0.92                | 0.98                 | 0.90                 | 0.82                 | 1.07                 | 0.91                  | 0.91                  |
| 1243                  | 1.06                  | 1.05                  | 1.01                | 1.01                 | 0.95                 | 1.00                 | 1.00                 | 0.94                  | 1.05                  |
| 1266                  | 1.30                  | 0.81                  | 0.93                | 0.97                 | 0.97                 | 0.83                 | 1.05                 | 0.99                  | 0.86                  |
| 1288                  | 1.11                  | 0.90                  | 0.90                | 0.91                 | 0.84                 | 0.93                 | 1.01                 | 0.92                  | 1.12                  |
| 1300                  | 1.08                  | 0.98                  | 0.95                | 0.97                 | 0.86                 | 0.93                 | 1.01                 | 0.89                  | 1.08                  |
| 1318                  | 1.30                  | 0.93                  | 1.11                | 1.19                 | 1.04                 | 0.97                 | 1.08                 | 0.87                  | 0.94                  |
| 1360                  | 1.00                  | 0.62                  | 1.01                | 0.90                 | 0.54                 | 0.58                 | 0.89                 | 0.60                  | 1.07                  |
| 1469                  | 1.17                  | 0.81                  | 0.95                | 0.95                 | 0.91                 | 1.00                 | 1.00                 | 0.95                  | 1.10                  |
| 1531                  | 1.33                  | 0.68                  | 1.01                | 0.59                 | 0.65                 | 0.57                 | 0.59                 | 1.10                  | 0.87                  |
| 1565                  | 1.14                  | 0.97                  | 0.93                | 0.88                 | 0.76                 | 0.97                 | 0.95                 | 0.87                  | 1.27                  |
| 1584                  | 1.04                  | 1.07                  | 1.09                | 1.01                 | 0.89                 | 1.11                 | 0.93                 | 0.88                  | 1.25                  |
| 1585                  | 0.94                  | 1.10                  | 0.89                | 0.94                 | 0.88                 | 0.74                 | 1.06                 | 0.93                  | 0.84                  |
| 1612                  | 1.14                  | 0.93                  | 0.90                | 0.91                 | 0.84                 | 0.84                 | 1.01                 | 0.93                  | 1.00                  |
| 1613                  | 0.89                  | 1.08                  | 1.07                | 1.18                 | 1.11                 | 1.05                 | 1.10                 | 0.94                  | 0.94                  |
| 1614                  | 1.29                  | 0.96                  | 0.84                | 1.40                 | 0.86                 | 1.06                 | 1.66                 | 0.61                  | 1.23                  |
| 1615                  | 0.49                  | 1.45                  | 1.23                | 0.95                 | 0.82                 | 1.02                 | 0.77                 | 0.86                  | 1.24                  |
| 1632                  | 1.69                  | 1.15                  | 1.29                | 1.69                 | 1.87                 | 2.15                 | 1.31                 | 1.11                  | 1.15                  |
| 1662                  | 1.15                  | 0.81                  | 0.82                | 0.94                 | 0.87                 | 0.95                 | 1.15                 | 0.93                  | 1.09                  |
